# Supplementary material for: Co-expression network analysis predicts a key role of microRNAs in the adaptation of the porcine skeletal muscle to nutrient supply
Source: J Anim Sci Biotechnol. 2020 Jan 17;11:10. doi: 10.1186/s40104-019-0412-z (PMC6966835; doi:10.1186/s40104-019-0412-z)
Supplement: Supplementary file 1 — Additional file 1: Table S1. Meat quality and gluteus medius fatty acids composition traits recorded in AL-T0, AL-T1 and AL-T2 Duroc gilts. [file 40104_2019_412_MOESM1_ESM.xlsx]

## Sheet: table
Table S1: Means and standard deviations (SD) of meat qualitiy and gluteus medius (GM) fatty acids composition traits recorded in Duroc gilts belonging to AL-T0, AL-T1 and AL-T2 groups.
Trait	Units	Mean(AL-T0)	SD(AL-T0)	Mean(AL-T1)	SD(AL-T1)	Mean(AL-T2)	SD(AL-T2)	Data
GMIMF	%	3.68636	0.668988	3.54667	0.82798	4.00167	0.878365	Intramuscular fat content in GM
GM_Cholest	mg/100g	58.33	6.27868	59.8358	6.27151	58.6475	3.47486	Total cholesterol content in GM
PH45GM	-	6.58545	0.107365	6.51583	0.218984	6.46083	0.157795	GM pH measured 45 minutes post-mortem
PHGM	-	5.67	0.0715542	5.6225	0.0733764	5.615	0.061865	GM pH last measure
ECGM	-	3.79636	0.63797	4.52167	1.20924	4.21583	0.589768	GM electric conductivity
L	-	45.2309	1.19094	44.6408	2.53833	45.4625	2.22114	GM lightness measured with Minolta Chroma-Meter CR-200
a*	-	11.2482	1.08295	10.4525	1.02751	10.8392	1.24774	GM redness measured with Minolta Chroma-Meter CR-200
b*	-	2.07091	1.77018	1.19417	0.765607	1.4125	0.50321	GM yellowness measured with Minolta Chroma-Meter CR-200
C14:0	%	1.33636	0.136182	1.28333	0.12673	1.33333	0.0887625	Myristic acid content in GM
C15:1	%	0.00909091	0.0301511	0	0	0	0	Pentadecylic acid content in GM
C16:0	%	23.9	0.72111	23.325	0.888436	23.875	0.982691	Palmitic acid content in GM
C16:1_n9	%	2.96364	0.338446	2.65	0.3371	2.86667	0.270801	Palmitoleic acid content in GM
C17:0	%	0.209091	0.0301511	0.241667	0.0792961	0.208333	0.0514929	Margaric acid content in GM
C17:1	%	0.218182	0.098165	0.233333	0.0492366	0.2	0.0603023	Heptadecenoic acid (cis-10) content in GM
C18:0	%	13.8636	1.20023	14.375	1.60121	14.4167	0.574984	Stearic acid content in GM
C18:1_trans	%	0.8	0.289828	0.891667	0.271221	0.908333	0.0900337	Elaidic acid content in GM
C18:1_n9	%	39.8455	2.15098	39.2	1.67766	39.775	1.24545	Oleic acid content in GM
C18:1_n7	%	3.93636	0.229228	3.86667	0.305505	3.89167	0.215146	Vaccenic acid content in GM
C18:2_ω6	%	8.6	0.750999	9.39167	1.37475	8.10833	1.26236	Linoleic acid content in GM
C18:3_ω3	%	0.418182	0.0750757	0.458333	0.0514929	0.433333	0.0778499	α-Linolenic acid content in GM
C20:0	%	0.309091	0.0301511	0.308333	0.108362	0.333333	0.0492366	Arachidic acid content in GM
C20:4	%	1.48182	0.384235	1.61667	0.450925	1.28333	0.406388	Arachidonic acid content in GM
SFA	%	39.6182	1.97069	39.55	2.37583	40.1583	1.2774	Saturated fatty acids content in GM
MUFA	%	48.9182	2.44165	47.9667	2.065	48.85	1.28664	Monounstaturated fatty acids content in GM
PUFA	%	11.4545	1.36775	12.5167	2.01667	10.975	1.67773	Polyunsaturated fatty acids content in GM
ω6	%	8.90909	0.879152	9.70833	1.41	8.54167	1.34195	Omega-6 fatty acids content in GM
ω3	%	0.972727	0.303615	0.975	0.209436	1.125	0.561046	Omega-3 fatty acids content in GM
ω6/ω3	%	9.83636	1.79347	10.0583	1.23984	8.75	2.98405	Omega-6/Omega-3 ratio
FAT_trans	%	0.8	0.289828	0.891667	0.271221	0.908333	0.0900337	Trans fatty acids content in GM
UFA	%	58.9	1.96825	58.8333	2.25523	58.5333	1.08739	Unsaturated fatty acids content in GM
SFA/UFA	-	0.674545	0.055383	0.674167	0.0659832	0.688333	0.034859	Saturated/Unsaturated fatty acids ratio
PUFA/SFA	-	0.289091	0.0378033	0.319167	0.0638832	0.275	0.0479583	Polyunsaturated/Saturated fatty acids ratio
