# Supplementary material for: Co-expression network analysis predicts a key role of microRNAs in the adaptation of the porcine skeletal muscle to nutrient supply
Source: J Anim Sci Biotechnol. 2020 Jan 17;11:10. doi: 10.1186/s40104-019-0412-z (PMC6966835; doi:10.1186/s40104-019-0412-z)
Supplement: Supplementary file 2 — Additional file 2: Table S2. Differentially expressed mRNAs in the AL-T0/AL-T1 and AL-T0/AL-T2 contrasts. [file 40104_2019_412_MOESM2_ESM.xlsx]

## Sheet: ALT0ALT1_DE_proteincodings
Table S2: Differentially Expressed (DE) mRNAs in the AL-T0/AL-T1 contrast.
ID	gene	log2FC	P-value	q-value	log2CPM ALT0	log2CPM ALT1
ENSSSCG00000035037		-1.91082	1.75199e-14	1.87e-10	4.33375	2.60505
ENSSSCG00000017983		-1.33262	2.29449e-11	1.22e-07	6.83653	5.44621
ENSSSCG00000038500	TRIB1	-1.19854	3.74036e-11	1.33e-07	6.57163	5.34506
ENSSSCG00000039419	SLCO4A1	-1.95555	3.13504e-10	8.35e-07	2.11446	0.869637
ENSSSCG00000032527	FOSL2	-1.08249	7.14515e-10	1.52e-06	6.45866	5.34182
ENSSSCG00000032367	CEBPD	-1.56453	4.05995e-09	7.21e-06	2.79615	1.5949
ENSSSCG00000017986	NDEL1	-0.984826	6.15478e-09	9.36e-06	5.38097	4.36179
ENSSSCG00000025698	SERPINE1	-2.15961	7.10427e-09	9.46e-06	4.03861	2.16092
ENSSSCG00000021638	NEU3	1.51076	2.24133e-08	2.65e-05	4.09715	5.30196
ENSSSCG00000038727	GDNF	-1.34847	5.011e-08	5.29e-05	4.24694	2.99528
ENSSSCG00000036742	KLF15	-1.22146	5.46375e-08	5.29e-05	4.94668	3.75039
ENSSSCG00000031262	TXNIP	-1.35304	7.05573e-08	5.78e-05	9.4264	7.95595
ENSSSCG00000034207	CEBPB	-1.11679	7.02581e-08	5.78e-05	6.47604	5.34705
ENSSSCG00000006277	SPIDR	-1.24415	8.63383e-08	6.57e-05	3.75895	2.63247
ENSSSCG00000029507	RASGEF1B	-1.40139	9.76933e-08	6.93e-05	3.99771	2.71422
ENSSSCG00000038911	KLF2	-0.952268	1.0448e-07	6.95e-05	4.30707	3.37454
ENSSSCG00000031321	NR4A1	-1.13828	1.1593e-07	7.26e-05	8.23856	7.04097
ENSSSCG00000037766	NR3C2	-1.27693	1.4515e-07	8.18e-05	3.22424	2.13294
ENSSSCG00000010626	RBM20	-1.20001	1.45882e-07	8.18e-05	6.10416	4.89484
ENSSSCG00000023133	OSBPL6	-1.22289	1.66143e-07	8.42e-05	3.95106	2.92915
ENSSSCG00000006231	CHD7	-1.01544	1.5975e-07	8.42e-05	4.59492	3.5812
ENSSSCG00000011076	OTUD1	-1.35856	2.67471e-07	0.00010954	8.00191	6.43215
ENSSSCG00000015871	NR4A2	-1.25577	2.58302e-07	0.00010954	3.45622	2.43
ENSSSCG00000005437		-1.20691	2.54109e-07	0.00010954	4.55523	3.37837
ENSSSCG00000028056	ZFP36	-1.20033	2.38139e-07	0.00010954	7.60844	6.27511
ENSSSCG00000038374	CIART	-1.17662	2.38055e-07	0.00010954	4.46186	3.3661
ENSSSCG00000011133	PFKFB3	-1.87856	3.24537e-07	0.000127988	6.15988	4.24237
ENSSSCG00000038149	KCNE4	-1.68699	5.35631e-07	0.000196669	1.67883	0.733802
ENSSSCG00000036030	INKA2	1.80813	5.32232e-07	0.000196669	2.30765	3.544
ENSSSCG00000011125	GATA3	-1.24971	6.5892e-07	0.000233873	1.43169	0.751999
ENSSSCG00000032320	TCIM	-1.65467	8.32323e-07	0.00028177	3.29384	1.92267
ENSSSCG00000014168	ELL2	-1.5671	8.4679e-07	0.00028177	4.21329	2.81397
ENSSSCG00000010224	EGR2	-1.20393	1.00264e-06	0.000323517	2.14875	1.27747
ENSSSCG00000030095	ZBTB16	-0.799005	1.77727e-06	0.0005566	6.87745	6.03182
ENSSSCG00000004789	THBS1	-1.57764	2.02465e-06	0.000579945	5.45362	4.02741
ENSSSCG00000023806	LRRN1	-1.21372	2.03044e-06	0.000579945	1.74577	1.02392
ENSSSCG00000031154	ACKR2	-1.16351	2.03608e-06	0.000579945	3.24344	2.25031
ENSSSCG00000022256	DEPP1	-1.06134	2.06968e-06	0.000579945	3.45175	2.48792
ENSSSCG00000022925		-1.38589	2.47007e-06	0.000641495	4.81536	3.51497
ENSSSCG00000028322	BTG2	-1.09153	2.37788e-06	0.000641495	8.80392	7.62402
ENSSSCG00000013397	ARNTL	0.992065	2.46008e-06	0.000641495	2.93358	3.78936
ENSSSCG00000023031	TNNT2	-1.46651	2.60438e-06	0.000660273	2.99846	1.87578
ENSSSCG00000024416	MYH13	-0.866846	2.71908e-06	0.00067332	8.52705	7.62077
ENSSSCG00000015541	IER5	-0.800697	3.03883e-06	0.000720463	5.65465	4.8598
ENSSSCG00000004399	SLC22A16	1.07454	3.04478e-06	0.000720463	2.64959	3.46479
ENSSSCG00000024219	TIGAR	1.15527	3.32961e-06	0.000770732	3.71113	4.68524
ENSSSCG00000037201	MPV17	-0.907758	3.88004e-06	0.000879035	3.53632	2.71878
ENSSSCG00000012026	ADAMTS1	-1.25668	5.28472e-06	0.00117233	4.38911	3.20606
ENSSSCG00000015519	RASAL2	-1.02784	5.47941e-06	0.00119071	2.60526	1.77141
ENSSSCG00000033032	ZBTB14	0.935195	6.37074e-06	0.00135671	1.24487	1.80894
ENSSSCG00000011075	KIAA1217	-0.830956	6.85584e-06	0.00143139	5.57225	4.69056
ENSSSCG00000036787	APOLD1	-1.5291	7.27209e-06	0.0014891	3.38402	2.15738
ENSSSCG00000015037	IL18	-1.1679	8.52079e-06	0.00171188	1.55859	0.91701
ENSSSCG00000006290	SLC19A2	-1.36532	9.66404e-06	0.00190561	4.90899	3.61865
ENSSSCG00000014156	ARRDC3	-1.70532	1.02107e-05	0.00190742	6.07314	4.09782
ENSSSCG00000006698	BCL9	0.892238	1.01044e-05	0.00190742	3.61607	4.41565
ENSSSCG00000004154	TNFAIP3	0.93144	1.0077e-05	0.00190742	2.20073	2.88651
ENSSSCG00000004012	THBS2	2.11653	1.03968e-05	0.00190871	3.65129	5.47219
ENSSSCG00000006018	TRPS1	-1.32174	1.21526e-05	0.0021585	1.87045	1.02636
ENSSSCG00000010456	PANK1	1.20756	1.21628e-05	0.0021585	1.67341	2.49483
ENSSSCG00000006023	SYBU	-1.02329	1.42256e-05	0.00248318	2.6171	1.82115
ENSSSCG00000001347	PPP1R10	-0.959364	1.51582e-05	0.00260331	4.40102	3.45008
ENSSSCG00000038594	SDC4	-0.815624	2.07775e-05	0.00351173	5.3864	4.58168
ENSSSCG00000015986	HOXD1	1.34813	2.2425e-05	0.00373096	1.85482	2.78641
ENSSSCG00000002383	FOS	-1.06735	2.30513e-05	0.00377616	8.49449	7.27619
ENSSSCG00000023105	NET1	-0.753134	2.58164e-05	0.00416504	4.22015	3.46782
ENSSSCG00000004490	SETBP1	-1.15849	2.79584e-05	0.0044433	2.27904	1.47978
ENSSSCG00000009865	TBX3	-0.879656	2.85962e-05	0.00447784	2.84591	2.10579
ENSSSCG00000015550	RGS16	-1.08946	3.32937e-05	0.00513784	2.02903	1.25165
ENSSSCG00000017885	SMTNL2	0.941512	3.96895e-05	0.00603734	6.37051	7.1576
ENSSSCG00000015814		-1.13484	4.11314e-05	0.00613852	2.80216	1.92567
ENSSSCG00000034708	PITX2	0.713479	4.15077e-05	0.00613852	2.62587	3.20223
ENSSSCG00000006331	PBX1	-0.896717	4.32486e-05	0.00630837	4.27917	3.33556
ENSSSCG00000002252	ARRDC4	-1.53755	4.57349e-05	0.00656564	3.79411	2.59839
ENSSSCG00000038948	ETS2	-0.713128	4.62456e-05	0.00656564	6.86969	6.15948
ENSSSCG00000011496	ADAMTS9	-1.12812	4.78513e-05	0.00670422	4.28868	3.24641
ENSSSCG00000014336	EGR1	-1.38166	5.07615e-05	0.0070196	6.7257	5.17526
ENSSSCG00000009370	FOXO1	-0.791914	5.29057e-05	0.00722231	5.06382	4.28147
ENSSSCG00000005669	MIGA2	0.977322	5.43369e-05	0.00732378	3.39748	4.21849
ENSSSCG00000023714	SLC31A2	0.660735	5.68272e-05	0.0075637	3.87444	4.46144
ENSSSCG00000000078	TNRC6B	-0.841249	5.78131e-05	0.00759992	3.94512	3.17878
ENSSSCG00000000504	PTPRB	-0.755727	5.85614e-05	0.00760442	4.98733	4.26116
ENSSSCG00000001892	SCAMP2	0.791888	6.98779e-05	0.00896458	4.42864	5.06055
ENSSSCG00000001921	NEO1	-0.667179	7.19284e-05	0.00911778	5.34195	4.6231
ENSSSCG00000031744		-0.765264	7.38665e-05	0.0092533	2.96842	2.27416
ENSSSCG00000009152	SGMS2	-1.25753	7.51044e-05	0.00929897	3.08141	2.16247
ENSSSCG00000010517	PGAM1	0.792421	7.76939e-05	0.00950902	4.8187	5.47531
ENSSSCG00000017068	FAXDC2	-2.64996	8.23298e-05	0.0099619	2.17899	1.47228
ENSSSCG00000009216	SPP1	-2.52111	9.79873e-05	0.0117232	2.18567	0.79342
ENSSSCG00000038132	IRF2BP2	-0.777392	0.000100616	0.0119039	6.60076	5.82075
ENSSSCG00000006970	DLC1	-0.916525	0.000112962	0.0132177	4.50147	3.60213
ENSSSCG00000033175	SASH1	-0.797102	0.000121425	0.0140537	4.47947	3.72704
ENSSSCG00000016338	PER2	-0.772362	0.00014049	0.0160854	4.74536	3.95534
ENSSSCG00000029226	UBC	-0.772047	0.00014382	0.0162915	11.4954	10.7034
ENSSSCG00000021436	DFFB	0.817404	0.000154416	0.0169649	1.18347	1.64291
ENSSSCG00000017528	SNX11	0.817725	0.000151882	0.0169649	2.49383	3.13086
ENSSSCG00000002392	IRF2BPL	1.04581	0.000154545	0.0169649	2.90589	3.65288
ENSSSCG00000005648	SLC27A4	0.966788	0.000156448	0.0169986	2.59245	3.34778
ENSSSCG00000008349	CNRIP1	0.708453	0.000158593	0.0170576	3.70307	4.29968
ENSSSCG00000005636	SLC25A25	-0.829594	0.000180416	0.0190205	6.42338	5.50688
ENSSSCG00000022687	NAA40	0.848034	0.00018502	0.0193147	2.16684	2.75171
ENSSSCG00000017414	KAT2A	0.716208	0.000208134	0.0214012	3.18508	3.77116
ENSSSCG00000016824	RAI14	-0.966859	0.000241013	0.024441	2.15661	1.43009
ENSSSCG00000034494	MARS2	0.782834	0.000248379	0.0249239	1.79553	2.36767
ENSSSCG00000005672	PTPA	0.865241	0.000250456	0.0249239	5.12285	5.82287
ENSSSCG00000016605	LMOD2	-0.78292	0.000264571	0.0258454	8.01788	7.24762
ENSSSCG00000009605	GFRA2	1.08988	0.000263033	0.0258454	1.32891	2.06303
ENSSSCG00000029571	AVIL	-0.649572	0.000269072	0.0260462	4.87959	4.1996
ENSSSCG00000004215	KIAA0408	-1.45348	0.000287025	0.0273272	3.1046	1.80141
ENSSSCG00000022322	BCL2L11	-1.146	0.000287438	0.0273272	1.23215	0.660898
ENSSSCG00000021273		-0.903264	0.000290894	0.0274109	1.47182	0.94055
ENSSSCG00000006359	ADAMTS4	-1.48401	0.000296984	0.0277394	3.07396	1.94599
ENSSSCG00000004138	HIVEP2	-0.785844	0.000300401	0.0278146	6.80024	5.90242
ENSSSCG00000002283	FUT8	-0.833037	0.000305182	0.0280136	3.86476	2.97609
ENSSSCG00000040366	ADAMTSL1	-0.78419	0.000307852	0.0280172	3.79009	2.96456
ENSSSCG00000036555	PRDM8	-0.902663	0.000313826	0.0283188	1.41379	0.88321
ENSSSCG00000016898		-0.982456	0.000340377	0.0302028	2.52098	1.76719
ENSSSCG00000034654	MYOG	0.838521	0.000339966	0.0302028	5.61536	6.39375
ENSSSCG00000005965	MYC	-0.715782	0.000374792	0.0329817	4.09349	3.3631
ENSSSCG00000011264	CSRNP1	-0.862873	0.000385576	0.0336526	5.9032	4.85653
ENSSSCG00000026533	MYF6	-0.601656	0.000391203	0.0338661	8.50025	7.83434
ENSSSCG00000010455	SLC16A12	-1.22491	0.00039745	0.0341294	1.56767	0.890391
ENSSSCG00000001411	APOM	0.816728	0.000414242	0.0352868	1.67832	2.23239
ENSSSCG00000034763	IRS2	-0.812037	0.000423548	0.0355113	3.35441	2.65968
ENSSSCG00000006940	CCN1	-0.710444	0.00042348	0.0355113	5.06286	4.36379
ENSSSCG00000024428	CHRNA9	1.05059	0.000444754	0.0367112	1.67051	2.37825
ENSSSCG00000013178	ZDHHC5	0.693518	0.000449664	0.036831	5.52396	6.08924
ENSSSCG00000011451	ITIH3	-0.961688	0.000462595	0.0375979	3.17397	2.37542
ENSSSCG00000028190	HOMEZ	0.716257	0.00046609	0.0375979	2.22898	2.76031
ENSSSCG00000035212	KLF6	-1.41658	0.000473508	0.0379092	2.89257	1.72454
ENSSSCG00000011951	NFKBIZ	-1.69969	0.000477095	0.0379112	2.00412	1.01112
ENSSSCG00000005385	NR4A3	-1.38186	0.000484399	0.0379676	6.53017	4.99967
ENSSSCG00000010464	PPP1R3C	-0.683055	0.000484936	0.0379676	9.28804	8.51098
ENSSSCG00000007484	ZNF217	-0.988031	0.000490603	0.0380772	2.16195	1.45713
ENSSSCG00000009801	BCL7A	0.682445	0.000493487	0.0380772	3.21942	3.80949
ENSSSCG00000015595	ATF3	-0.86844	0.000498349	0.0381757	9.70436	8.65142
ENSSSCG00000021359	CDC42EP3	0.597538	0.000513025	0.0387425	5.01832	5.52183
ENSSSCG00000040728	EYA1	-0.9562	0.000535443	0.0401507	2.67823	1.90807
ENSSSCG00000013351	NAV2	-0.757365	0.000555811	0.0410992	3.16521	2.41007
ENSSSCG00000007993	CAPN15	0.731852	0.000552074	0.0410992	3.16672	3.75787
ENSSSCG00000039867	UCK2	0.779026	0.000566514	0.0416017	3.92231	4.58792
ENSSSCG00000017727	TMEM98	0.655786	0.000573968	0.0417797	3.23479	3.74922
ENSSSCG00000036933	NR1D1	0.794631	0.000576785	0.0417797	5.2848	6.02968
ENSSSCG00000010219	ARID5B	-1.21687	0.000618343	0.0441887	5.96791	4.53535
ENSSSCG00000008374	B3GNT2	-1.35764	0.000629368	0.0446099	1.73379	0.930279
ENSSSCG00000012110	MID1	-1.02043	0.000632616	0.0446099	1.37072	0.817122
ENSSSCG00000017607	TMEM100	-0.980128	0.000644003	0.0451141	2.97285	2.28105
ENSSSCG00000014251		-0.77508	0.000713751	0.0494539	1.49607	1.02853
ENSSSCG00000015283	PIK3C2B	0.638308	0.000715242	0.0494539	4.42353	4.92943

## Sheet: ALT0ALT2_DE_proteincodings
Table S2: Differentially Expressed (DE) mRNAs in the AL-T0/AL-T2 contrast.
ID	gene	log2FC	P-value	q-value	log2CPM ALT0	log2CPM ALT2
ENSSSCG00000015334	PDK4	-4.94029	1.86366e-22	2e-18	8.85161	3.81692
ENSSSCG00000021638	NEU3	1.9862	6.49799e-18	3.48e-14	4.09715	5.98331
ENSSSCG00000010219	ARID5B	-2.59509	1.49338e-17	5.33e-14	5.96791	3.60283
ENSSSCG00000038500	TRIB1	-1.62765	3.17029e-17	8.49e-14	6.57163	5.04767
ENSSSCG00000039419	SLCO4A1	-2.39438	2.44439e-16	5.24e-13	2.11446	0.755767
ENSSSCG00000015595	ATF3	-1.93847	2.30821e-15	4.12e-12	9.70436	7.72797
ENSSSCG00000017986	NDEL1	-1.49253	3.33129e-15	5.1e-12	5.38097	3.97434
ENSSSCG00000005589	NR6A1	-2.01147	7.72489e-15	1.03e-11	3.7141	2.0265
ENSSSCG00000030165	MAFF	-2.08542	9.07426e-15	1.08e-11	5.98056	4.00984
ENSSSCG00000027684	TRIM63	-1.73404	1.14664e-14	1.23e-11	9.56714	7.95991
ENSSSCG00000011076	OTUD1	-2.099	8.28467e-14	8.07e-11	8.00191	5.78856
ENSSSCG00000022687	NAA40	1.73266	9.1314e-14	8.15e-11	2.16684	3.64125
ENSSSCG00000013397	ARNTL	1.39647	1.41518e-13	1.17e-10	2.93358	4.32953
ENSSSCG00000004332	BACH2	-2.09795	4.28702e-13	3.28e-10	3.09558	1.50037
ENSSSCG00000010464	PPP1R3C	-1.36055	5.73539e-13	4.1e-10	9.28804	7.96533
ENSSSCG00000010626	RBM20	-1.38219	1.78848e-12	1.2e-09	6.10416	4.89715
ENSSSCG00000031262	TXNIP	-1.51464	4.14542e-12	2.61e-09	9.4264	8.02494
ENSSSCG00000029507	RASGEF1B	-1.71564	1.02808e-11	6.12e-09	3.99771	2.56001
ENSSSCG00000028322	BTG2	-1.61799	1.1531e-11	6.5e-09	8.80392	7.21763
ENSSSCG00000016338	PER2	-1.35962	1.40931e-11	7.55e-09	4.74536	3.5207
ENSSSCG00000016605	LMOD2	-1.44574	2.48855e-11	1.27e-08	8.01788	6.69814
ENSSSCG00000005288	TLE4	-1.2554	2.87136e-11	1.4e-08	6.19565	5.011
ENSSSCG00000025698	SERPINE1	-2.36833	4.28952e-11	2e-08	4.03861	2.17083
ENSSSCG00000005631	FAM102A	-1.45852	5.3342e-11	2.38e-08	3.41649	2.28216
ENSSSCG00000006290	SLC19A2	-2.15999	6.53715e-11	2.8e-08	4.90899	3.02149
ENSSSCG00000010992		1.33915	2.48621e-10	1.02e-07	2.89459	4.11541
ENSSSCG00000036030	INKA2	2.15679	2.65756e-10	1.05e-07	2.30765	4.05288
ENSSSCG00000035537	RUNX1	-1.56064	4.71135e-10	1.68e-07	5.50044	4.06576
ENSSSCG00000022256	DEPP1	-1.28016	4.4445e-10	1.68e-07	3.45175	2.43471
ENSSSCG00000023714	SLC31A2	1.20492	4.67231e-10	1.68e-07	3.87444	5.05263
ENSSSCG00000002283	FUT8	-1.21823	8.35352e-10	2.89e-07	3.86476	2.81615
ENSSSCG00000040412		-1.27205	9.7615e-10	3.17e-07	5.26108	4.13888
ENSSSCG00000032527	FOSL2	-1.15087	9.65333e-10	3.17e-07	6.45866	5.37894
ENSSSCG00000026533	MYF6	-1.04129	1.04661e-09	3.3e-07	8.50025	7.52149
ENSSSCG00000036742	KLF15	-1.26099	1.18319e-09	3.62e-07	4.94668	3.85729
ENSSSCG00000005965	MYC	-1.22063	1.43489e-09	4.27e-07	4.09349	3.03854
ENSSSCG00000013351	NAV2	-1.17096	1.54828e-09	4.48e-07	3.16521	2.22154
ENSSSCG00000005981	FBXO32	-2.0784	1.96515e-09	5.5e-07	8.62922	6.63095
ENSSSCG00000001892	SCAMP2	1.02923	2.00075e-09	5.5e-07	4.42864	5.46218
ENSSSCG00000031728	ABRA	-1.42202	2.21694e-09	5.94e-07	9.09373	7.71058
ENSSSCG00000009801	BCL7A	1.15786	4.59835e-09	1.2e-06	3.21942	4.38047
ENSSSCG00000017885	SMTNL2	1.13749	4.97136e-09	1.27e-06	6.37051	7.53897
ENSSSCG00000010456	PANK1	1.40362	5.10932e-09	1.27e-06	1.67341	2.84273
ENSSSCG00000005514	RAB14	1.48523	1.10166e-08	2.68e-06	3.26832	4.63008
ENSSSCG00000035400	YPEL2	1.36912	1.36225e-08	3.24e-06	3.7816	5.12551
ENSSSCG00000035774	ERRFI1	-1.01697	1.62696e-08	3.79e-06	4.57794	3.7023
ENSSSCG00000037201	MPV17	-1.21457	1.85809e-08	4.24e-06	3.53632	2.55728
ENSSSCG00000009364	FREM2	-1.17275	2.00626e-08	4.48e-06	2.78898	1.91471
ENSSSCG00000027628	IL6R	-1.19163	2.05689e-08	4.5e-06	4.62608	3.62564
ENSSSCG00000004399	SLC22A16	1.30225	2.20241e-08	4.72e-06	2.64959	3.79501
ENSSSCG00000038038	SBK1	1.48568	2.59617e-08	5.45e-06	1.6047	2.75941
ENSSSCG00000001723	PLA2G7	1.21982	2.85089e-08	5.87e-06	3.04645	4.15404
ENSSSCG00000010118	HIRA	0.931642	3.04947e-08	6.16e-06	4.77271	5.73903
ENSSSCG00000017251	SOX9	-1.42086	3.23391e-08	6.42e-06	2.29695	1.38218
ENSSSCG00000006277	SPIDR	-1.2499	5.56512e-08	1.08e-05	3.75895	2.74725
ENSSSCG00000008171	NPAS2	1.13253	6.04401e-08	1.16e-05	1.52669	2.38598
ENSSSCG00000006331	PBX1	-1.27799	6.89454e-08	1.25e-05	4.27917	3.09207
ENSSSCG00000009370	FOXO1	-1.02576	6.69568e-08	1.25e-05	5.06382	4.18758
ENSSSCG00000005669	MIGA2	1.26521	6.83255e-08	1.25e-05	3.39748	4.62256
ENSSSCG00000015283	PIK3C2B	0.92246	8.32731e-08	1.49e-05	4.42353	5.35053
ENSSSCG00000002392	IRF2BPL	1.26936	8.55156e-08	1.5e-05	2.90589	4.06255
ENSSSCG00000017518		1.01625	1.04452e-07	1.81e-05	1.56105	2.36298
ENSSSCG00000014156	ARRDC3	-1.92382	1.17641e-07	1.96e-05	6.07314	4.13299
ENSSSCG00000003148	DBP	-1.49879	1.19067e-07	1.96e-05	2.98029	1.93353
ENSSSCG00000012315	SYNJ2	1.55317	1.18296e-07	1.96e-05	1.44196	2.59288
ENSSSCG00000036340	ZBTB5	0.92434	1.39803e-07	2.27e-05	3.08995	4.01085
ENSSSCG00000011133	PFKFB3	-2.02668	1.64094e-07	2.62e-05	6.15988	4.17765
ENSSSCG00000010210	SLC16A9	-2.08764	1.97513e-07	3.11e-05	2.13931	0.967628
ENSSSCG00000006740	ATP1A1	0.933179	2.07864e-07	3.23e-05	5.9209	6.87897
ENSSSCG00000012361	AMER1	0.937425	2.23515e-07	3.42e-05	3.2148	4.13354
ENSSSCG00000035037		-1.46957	2.8203e-07	4.26e-05	4.33375	3.02913
ENSSSCG00000036136	BHLHE40	-0.969687	3.14293e-07	4.68e-05	8.04915	7.17927
ENSSSCG00000035101	KLF5	-1.62727	3.48271e-07	5.11e-05	4.54186	3.31134
ENSSSCG00000014168	ELL2	-1.71429	4.28478e-07	6.12e-05	4.21329	2.80433
ENSSSCG00000004138	HIVEP2	-1.39429	4.25679e-07	6.12e-05	6.80024	5.31219
ENSSSCG00000006231	CHD7	-1.02361	4.73781e-07	6.65e-05	4.59492	3.68319
ENSSSCG00000009605	GFRA2	1.48462	4.77914e-07	6.65e-05	1.32891	2.46515
ENSSSCG00000001921	NEO1	-0.763211	5.96937e-07	8.2e-05	5.34195	4.67511
ENSSSCG00000024960	PDGFC	-0.922123	7.88235e-07	0.000105564	4.05144	3.29416
ENSSSCG00000017682	MYO19	1.11066	7.80147e-07	0.000105564	2.28627	3.22542
ENSSSCG00000005385	NR4A3	-2.17379	8.6661e-07	0.000111866	6.53017	4.24888
ENSSSCG00000003805	PDE4B	-1.02433	8.54302e-07	0.000111866	6.01498	5.06651
ENSSSCG00000007317	DLGAP4	0.77674	8.60957e-07	0.000111866	6.85878	7.69894
ENSSSCG00000015519	RASAL2	-1.1032	9.87351e-07	0.000125934	2.60526	1.81671
ENSSSCG00000028056	ZFP36	-0.946746	1.09569e-06	0.000138109	7.60844	6.74354
ENSSSCG00000006698	BCL9	1.01714	1.12302e-06	0.000139907	3.61607	4.62461
ENSSSCG00000026196		-1.58738	1.16044e-06	0.000142907	3.07768	1.99193
ENSSSCG00000010529	SFRP5	1.44251	1.26605e-06	0.000154142	2.0899	3.1818
ENSSSCG00000031321	NR4A1	-1.1537	1.42995e-06	0.000170228	8.23856	7.07561
ENSSSCG00000017391	PLEKHH3	1.25699	1.42512e-06	0.000170228	2.48125	3.54522
ENSSSCG00000032053	ST8SIA5	1.07258	1.58519e-06	0.000186635	2.9573	3.93513
ENSSSCG00000032367	CEBPD	-1.33607	1.70837e-06	0.000198951	2.79615	1.82202
ENSSSCG00000004918	ALPK2	-0.815806	1.80462e-06	0.0002079	5.23765	4.49097
ENSSSCG00000038374	CIART	-1.11964	1.88723e-06	0.000215104	4.46186	3.52709
ENSSSCG00000038594	SDC4	-0.97482	1.92889e-06	0.000217538	5.3864	4.5311
ENSSSCG00000032043	SLC35D1	0.813548	2.0275e-06	0.000226277	4.18808	5.04034
ENSSSCG00000032835	TMEM268	0.856396	2.18874e-06	0.000239982	2.2323	2.98568
ENSSSCG00000025822	SFRP1	1.87396	2.19509e-06	0.000239982	2.43343	3.66619
ENSSSCG00000025943	C6orf136	0.957299	2.39685e-06	0.000259392	3.19438	4.1727
ENSSSCG00000023133	OSBPL6	-1.20819	2.6938e-06	0.000288614	3.95106	3.00925
ENSSSCG00000001471	BRD2	-0.709583	2.73769e-06	0.000290412	7.56135	6.96788
ENSSSCG00000015872	GPD2	-0.748372	2.79157e-06	0.000293225	7.09096	6.43039
ENSSSCG00000013784	DNAJB1	1.29355	3.03274e-06	0.000315464	5.6875	7.16191
ENSSSCG00000004012	THBS2	2.3258	3.1162e-06	0.000321029	3.65129	5.75618
ENSSSCG00000015774	TENM3	-1.05859	3.22566e-06	0.00032914	1.89902	1.271
ENSSSCG00000010822	BPNT1	0.787208	3.35826e-06	0.000339437	2.89918	3.6611
ENSSSCG00000036223	ACKR1	-0.855077	3.66778e-06	0.000366111	3.88165	3.17145
ENSSSCG00000017414	KAT2A	0.91242	3.71591e-06	0.000366111	3.18508	4.05022
ENSSSCG00000007993	CAPN15	0.964643	3.72467e-06	0.000366111	3.16672	4.08228
ENSSSCG00000003369	ICMT	0.762527	4.16275e-06	0.000405452	6.27879	7.07111
ENSSSCG00000030303	ACHE	-1.21759	4.36156e-06	0.000420989	3.12579	2.15126
ENSSSCG00000024219	TIGAR	1.26013	4.54404e-06	0.000434686	3.71113	4.85294
ENSSSCG00000033822	THRSP	2.45803	4.61941e-06	0.000437986	1.8706	3.73833
ENSSSCG00000011499	LRIG1	-0.667191	4.7593e-06	0.00044729	4.79899	4.23176
ENSSSCG00000021436	DFFB	1.03342	4.81349e-06	0.00044845	1.18347	1.87548
ENSSSCG00000038763	CERK	1.0866	4.86868e-06	0.000449682	2.12767	3.09544
ENSSSCG00000005648	SLC27A4	1.09753	5.60676e-06	0.000513426	2.59245	3.59488
ENSSSCG00000029687	TMEM246	1.00151	5.68799e-06	0.00051645	3.47024	4.38287
ENSSSCG00000030095	ZBTB16	-0.908553	5.73806e-06	0.000516618	6.87745	5.99691
ENSSSCG00000002806	MMP15	1.15364	5.84945e-06	0.000522258	4.83501	5.93991
ENSSSCG00000029226	UBC	-0.916321	6.40517e-06	0.000564018	11.4954	10.6668
ENSSSCG00000010330	PPIF	0.829475	6.42246e-06	0.000564018	4.08602	4.93064
ENSSSCG00000011646	KY	-0.981932	6.57301e-06	0.000567911	9.11205	8.25222
ENSSSCG00000012875	TPCN2	0.965809	6.62581e-06	0.000567911	1.36588	2.09605
ENSSSCG00000025448	SERTAD3	0.984368	6.53511e-06	0.000567911	3.25876	4.1603
ENSSSCG00000013599	ANGPTL4	-1.54935	6.75669e-06	0.000574533	4.1455	3.00922
ENSSSCG00000009152	SGMS2	-1.46016	7.50906e-06	0.000620442	3.08141	2.12858
ENSSSCG00000035940	SPSB1	-0.920646	7.46422e-06	0.000620442	3.87546	3.1627
ENSSSCG00000038948	ETS2	-0.856138	7.56368e-06	0.000620442	6.86969	6.11395
ENSSSCG00000039348	H1F0	-0.846697	7.58614e-06	0.000620442	5.2706	4.57065
ENSSSCG00000004154	TNFAIP3	1.09331	7.47911e-06	0.000620442	2.20073	3.07424
ENSSSCG00000029711	ZNF518B	0.728443	8.49632e-06	0.000689618	3.30149	4.05444
ENSSSCG00000008349	CNRIP1	0.846476	8.77206e-06	0.000706645	3.70307	4.53836
ENSSSCG00000016835	SKP2	1.44805	9.39769e-06	0.000751394	1.9823	3.08513
ENSSSCG00000009464	COMMD6	-0.956896	9.49258e-06	0.000753359	6.37407	5.47921
ENSSSCG00000023105	NET1	-0.841885	9.82819e-06	0.000774259	4.22015	3.49154
ENSSSCG00000007094	DZANK1	1.04626	1.04815e-05	0.000819698	1.82848	2.67588
ENSSSCG00000017506	FBXL20	-0.891266	1.08882e-05	0.000845337	3.1188	2.45603
ENSSSCG00000009808	TMEM120B	0.821931	1.10451e-05	0.00085135	3.81851	4.68239
ENSSSCG00000009676	ZNF395	0.824073	1.15622e-05	0.000884841	3.3348	4.16263
ENSSSCG00000015969	CHRNA1	-1.52052	1.23434e-05	0.000936734	3.45947	2.4005
ENSSSCG00000021586	ZHX2	-0.877499	1.25348e-05	0.000936734	4.88132	4.18883
ENSSSCG00000024416	MYH13	-0.838784	1.259e-05	0.000936734	8.52705	7.75279
ENSSSCG00000024954	FGF1	0.879519	1.24817e-05	0.000936734	2.52523	3.3109
ENSSSCG00000010329	ZMIZ1	-0.852944	1.39841e-05	0.00103328	4.6931	3.94925
ENSSSCG00000009029	ARHGAP10	-0.700607	1.42145e-05	0.00104311	5.63945	4.99777
ENSSSCG00000016068	HECW2	-1.37308	1.62091e-05	0.00118139	2.38059	1.43221
ENSSSCG00000014878	PAK1	-0.888845	1.64431e-05	0.00119035	6.69525	5.89858
ENSSSCG00000005301	FAM214B	0.71916	1.65835e-05	0.00119246	3.45223	4.18266
ENSSSCG00000004347	FBXL4	-1.11596	1.71603e-05	0.0012257	5.01817	4.05417
ENSSSCG00000017477	CASC3	0.650569	1.80888e-05	0.00128346	5.28109	6.00637
ENSSSCG00000000014	FAM118A	0.795137	1.84933e-05	0.0012989	2.68988	3.43353
ENSSSCG00000034102	DGAT2	1.70035	1.85565e-05	0.0012989	2.90829	4.35031
ENSSSCG00000017801	TRARG1	1.72781	1.867e-05	0.0012989	3.05823	4.36814
ENSSSCG00000008162	IL1R1	-0.954027	2.02625e-05	0.00138275	4.25396	3.51051
ENSSSCG00000014056	RNF44	0.656205	2.02303e-05	0.00138275	3.43131	4.11039
ENSSSCG00000038967	NADK	0.754639	2.0063e-05	0.00138275	4.35684	5.11369
ENSSSCG00000026446		0.632552	2.10837e-05	0.00142969	4.24532	4.909
ENSSSCG00000010517	PGAM1	0.837355	2.18592e-05	0.00147295	4.8187	5.64806
ENSSSCG00000011641	SLCO2A1	-0.799665	2.31864e-05	0.00155262	3.75172	3.1206
ENSSSCG00000030268	ZFAND5	-0.800037	2.34253e-05	0.00155887	9.32494	8.60845
ENSSSCG00000003747	KIAA1328	-0.903513	2.54632e-05	0.00168403	1.9662	1.39732
ENSSSCG00000005636	SLC25A25	-0.7135	2.58036e-05	0.00169607	6.42338	5.84155
ENSSSCG00000011264	CSRNP1	-1.30726	2.63228e-05	0.00169743	5.9032	4.38044
ENSSSCG00000008443	EPAS1	-0.630271	2.66164e-05	0.00169743	6.41071	5.86789
ENSSSCG00000002412	STON2	0.775785	2.63813e-05	0.00169743	3.15172	3.93971
ENSSSCG00000036401		0.817568	2.61104e-05	0.00169743	3.33078	4.19642
ENSSSCG00000031159	BEND3	0.973579	2.64813e-05	0.00169743	1.19901	1.89557
ENSSSCG00000038598	ADRB2	-1.04266	2.85453e-05	0.00180967	4.74608	3.82776
ENSSSCG00000037066	GADD45A	-1.25322	3.09236e-05	0.00194891	4.86107	3.78805
ENSSSCG00000040334	CBX6	0.929283	3.23115e-05	0.00202448	3.04125	3.91597
ENSSSCG00000004789	THBS1	-1.44818	3.3514e-05	0.00207554	5.45362	4.22326
ENSSSCG00000017759	ALDOC	1.56837	3.34367e-05	0.00207554	3.48553	4.70204
ENSSSCG00000002993	CYP2A19	1.91251	3.41425e-05	0.00210231	1.73931	2.87415
ENSSSCG00000026894	NFE2L3	-0.94191	3.69086e-05	0.00225965	2.58845	1.91039
ENSSSCG00000025194	ZSWIM6	-1.42755	3.76562e-05	0.00229232	2.79247	1.78537
ENSSSCG00000015659	YOD1	-2.10014	3.8854e-05	0.00235188	2.18342	1.18685
ENSSSCG00000025240	DDIT4L	-1.24669	4.04707e-05	0.00243597	7.53021	6.45837
ENSSSCG00000012941	SLC29A2	0.836238	4.09286e-05	0.00244977	3.84657	4.7395
ENSSSCG00000011433	WDR82	0.728102	4.13558e-05	0.00246159	5.90535	6.66537
ENSSSCG00000011670	PXYLP1	0.904182	4.18743e-05	0.00247868	2.03219	2.82087
ENSSSCG00000033032	ZBTB14	0.855177	4.32261e-05	0.00254464	1.24487	1.8472
ENSSSCG00000017195	TRIM65	0.850944	4.40954e-05	0.00258163	1.11443	1.68597
ENSSSCG00000034278	SLC31A1	0.919464	4.51162e-05	0.00262704	3.86382	4.69663
ENSSSCG00000022347	WNT11	0.939658	4.63375e-05	0.00268121	1.70434	2.47521
ENSSSCG00000009245	SCD5	1.21994	4.6547e-05	0.00268121	0.675924	1.30628
ENSSSCG00000040559	ZNF691	0.735443	4.82213e-05	0.0027628	2.28424	2.97774
ENSSSCG00000022413	TIRAP	0.893196	4.8661e-05	0.00277316	1.11696	1.72191
ENSSSCG00000006218	PDE7A	-0.867271	5.03114e-05	0.00285205	5.114	4.43476
ENSSSCG00000004929	PARP16	0.776566	5.63246e-05	0.00317611	1.8118	2.48756
ENSSSCG00000038521	CHAC1	-1.30921	6.11607e-05	0.00343076	2.76997	1.72392
ENSSSCG00000027105	TUBGCP5	-1.13793	6.24722e-05	0.00348608	2.2897	1.52551
ENSSSCG00000034654	MYOG	0.743515	6.38699e-05	0.00354561	5.61536	6.50193
ENSSSCG00000011075	KIAA1217	-0.748812	6.47976e-05	0.00357856	5.57225	4.89527
ENSSSCG00000036956		-1.45863	6.70804e-05	0.00366684	4.55902	3.45161
ENSSSCG00000037835	TRIM7	-0.861841	6.78012e-05	0.00368742	5.73107	5.03662
ENSSSCG00000004980	THSD4	-0.793364	7.11246e-05	0.00382929	3.76525	3.07266
ENSSSCG00000012241	BCOR	0.889046	7.08038e-05	0.00382929	2.97513	3.74825
ENSSSCG00000014399	ARHGAP26	-1.01758	7.17719e-05	0.00384482	2.97622	2.27964
ENSSSCG00000025638	UBE2Z	0.629674	7.26774e-05	0.00387396	4.91069	5.58019
ENSSSCG00000031592	ZNF462	-0.902561	7.43891e-05	0.00394557	4.85653	4.04893
ENSSSCG00000028572	PER3	-0.658449	7.75763e-05	0.00409363	3.91827	3.38544
ENSSSCG00000000971	HDAC10	0.904887	7.79448e-05	0.00409363	1.65891	2.38734
ENSSSCG00000017254	MAP2K6	-0.700349	7.83506e-05	0.00409487	3.3423	2.79733
ENSSSCG00000001898	ULK3	0.717369	8.57162e-05	0.0044247	2.79151	3.49048
ENSSSCG00000027251	CDC7	0.900037	8.59004e-05	0.0044247	1.14126	1.74098
ENSSSCG00000017498	PPP1R1B	1.25429	8.72997e-05	0.00447526	1.92882	2.77093
ENSSSCG00000002140		-0.747952	8.84907e-05	0.00451471	6.07364	5.37304
ENSSSCG00000017260	WIPI1	0.713891	9.04264e-05	0.0045916	5.18375	5.9383
ENSSSCG00000005501	TRIM32	0.674228	9.27377e-05	0.00468676	2.94614	3.61184
ENSSSCG00000013178	ZDHHC5	0.64626	9.43814e-05	0.00474705	5.52396	6.214
ENSSSCG00000003428	MTHFR	0.701722	9.48169e-05	0.00474705	3.17948	3.89442
ENSSSCG00000015715	EN1	0.8947	9.72464e-05	0.00484604	0.925751	1.46733
ENSSSCG00000009807	RHOF	0.711035	9.81576e-05	0.0048688	3.16768	3.89959
ENSSSCG00000039867	UCK2	0.967392	9.89201e-05	0.00488401	3.92231	4.83471
ENSSSCG00000004215	KIAA0408	-1.49461	0.000100514	0.00493992	3.1046	1.88314
ENSSSCG00000016436	CHPF2	0.660653	0.000102457	0.00501242	3.87544	4.62056
ENSSSCG00000016462	CLCN1	-0.834503	0.000119651	0.00582702	6.09787	5.37666
ENSSSCG00000003527	EPHB2	1.14491	0.00012104	0.00586797	1.21763	1.94995
ENSSSCG00000030118	SAP30	0.699277	0.000122892	0.00593094	2.12712	2.75201
ENSSSCG00000037292	PLA2G4E	0.978016	0.000124443	0.00597887	1.31237	2.0234
ENSSSCG00000005233	DMRT2	0.971833	0.000131449	0.00628723	1.07532	1.70397
ENSSSCG00000010554	SCD	1.91871	0.000132682	0.00631802	4.54023	6.15506
ENSSSCG00000036403	FAM180A	-1.2227	0.000140417	0.00662744	1.56156	0.852843
ENSSSCG00000022837	TMUB2	0.634758	0.000140353	0.00662744	3.91178	4.59228
ENSSSCG00000011125	GATA3	-0.897641	0.000151927	0.00707714	1.43169	0.961359
ENSSSCG00000009814	ANAPC5	-0.651765	0.000151288	0.00707714	4.00641	3.47736
ENSSSCG00000016134	FASTKD2	-0.62583	0.000151347	0.00707714	3.44388	2.98583
ENSSSCG00000017528	SNX11	0.895807	0.000153334	0.00711176	2.49383	3.26097
ENSSSCG00000011106	CREM	-0.797758	0.000161447	0.0074558	5.05027	4.38312
ENSSSCG00000021232	SYNC	-0.698048	0.000168406	0.00774379	5.24208	4.65035
ENSSSCG00000026741	TBCC	0.708349	0.000173421	0.00794032	3.47734	4.1666
ENSSSCG00000013292	PRR5L	1.12052	0.000180283	0.00821938	1.15011	1.81416
ENSSSCG00000000063	POLR3H	0.635635	0.000188811	0.00853554	3.74162	4.39973
ENSSSCG00000013056	LGALS12	1.64599	0.000188088	0.00853554	1.01025	1.84006
ENSSSCG00000005303	PIGO	0.82009	0.000190409	0.00857162	3.07584	3.82304
ENSSSCG00000001844	PLIN1	1.44265	0.000192802	0.00864302	3.32246	4.42269
ENSSSCG00000000759		-0.815922	0.000199142	0.00889003	3.56669	2.94105
ENSSSCG00000016792	RETREG1	-1.64685	0.000202463	0.00897204	6.7658	4.82608
ENSSSCG00000033196	MYORG	0.66759	0.000202654	0.00897204	6.49223	7.17074
ENSSSCG00000014132		-0.912171	0.000205474	0.00905946	1.3972	0.946804
ENSSSCG00000007874	ABCC1	-0.623715	0.000208009	0.00913363	6.38682	5.83758
ENSSSCG00000017983		-0.909316	0.000208904	0.00913552	6.83653	5.88529
ENSSSCG00000002917		0.799932	0.000211287	0.00920217	1.33357	1.91292
ENSSSCG00000024644	CIDEA	1.25164	0.000212869	0.0092335	2.33452	3.13997
ENSSSCG00000015037	IL18	-1.23279	0.000217924	0.00941468	1.55859	0.938516
ENSSSCG00000034994	AKAP1	0.798238	0.000219365	0.00943886	5.25562	6.05343
ENSSSCG00000026724	PLBD1	-0.656402	0.000225727	0.00967375	4.54871	4.00735
ENSSSCG00000034049		-0.872545	0.000227767	0.0097223	2.42416	1.89375
ENSSSCG00000013667	COL5A3	0.687826	0.000233934	0.00994592	6.12092	6.85457
ENSSSCG00000003558	RPS6KA1	-0.782364	0.000236908	0.0100326	2.65834	2.13357
ENSSSCG00000009243	THAP9	0.965156	0.000241672	0.010194	2.177	2.95505
ENSSSCG00000024596	NOCT	-0.831114	0.000244373	0.0102675	3.63438	2.99532
ENSSSCG00000000209	NCKAP5L	0.724188	0.000248791	0.0103718	2.64668	3.34995
ENSSSCG00000009927	FAM222A	0.927078	0.000255826	0.0106237	1.91072	2.74997
ENSSSCG00000033146	CD163	-1.16992	0.000259281	0.0107256	3.82339	2.97631
ENSSSCG00000002315	SLC8A3	-0.624718	0.000261096	0.0107592	5.72509	5.23416
ENSSSCG00000013375	MYOD1	1.0745	0.00026289	0.0107916	3.3372	4.26468
ENSSSCG00000023373	ZNHIT3	0.617932	0.000267224	0.0109276	3.87514	4.51715
ENSSSCG00000039986	RGS8	-1.1332	0.000271452	0.011039	1.67201	1.0208
ENSSSCG00000035518		0.596427	0.000272007	0.011039	3.67135	4.29887
ENSSSCG00000039681	B9D1	0.902226	0.000279581	0.0113035	2.39223	3.19105
ENSSSCG00000016606	ASB15	-0.949686	0.000286389	0.0115352	5.01586	4.17271
ENSSSCG00000005503	TLR4	-1.08355	0.00029276	0.0117003	2.04688	1.40917
ENSSSCG00000000741	NRIP2	1.1636	0.000293764	0.0117003	0.897092	1.56983
ENSSSCG00000028190	HOMEZ	0.710759	0.000299136	0.0118264	2.22898	2.88037
ENSSSCG00000005449	PTPN3	0.657835	0.000301883	0.0118911	3.54683	4.20655
ENSSSCG00000008374	B3GNT2	-1.06348	0.00030499	0.0119258	1.73379	1.16966
ENSSSCG00000040464	LEP	1.6068	0.000304746	0.0119258	0.83117	1.65923
ENSSSCG00000003579	AHDC1	0.62421	0.000310712	0.0121054	5.01356	5.66728
ENSSSCG00000015550	RGS16	-0.792201	0.000312014	0.012112	2.02903	1.54286
ENSSSCG00000015242	NFRKB	0.595635	0.000323715	0.0124758	4.49097	5.13468
ENSSSCG00000004954	C15orf61	0.659671	0.000322773	0.0124758	1.66769	2.21863
ENSSSCG00000034207	CEBPB	-0.785357	0.000327183	0.0125643	6.47604	5.74001
ENSSSCG00000017584	PPP1R9B	0.794816	0.000337526	0.0129152	3.8175	4.60301
ENSSSCG00000034262	FIGN	1.22395	0.000342462	0.0130574	1.42403	2.37271
ENSSSCG00000031866	TIMP3	-0.65989	0.000345428	0.0130774	7.54651	7.00839
ENSSSCG00000008132	STARD7	0.940547	0.000344399	0.0130774	4.57905	5.47583
ENSSSCG00000010639	HABP2	-0.722084	0.00034771	0.0131175	7.70288	6.99302
ENSSSCG00000028045	MUL1	0.7752	0.000354477	0.0133258	5.0949	5.88617
ENSSSCG00000025021	MALL	-0.622829	0.000360868	0.0134902	3.3416	2.89012
ENSSSCG00000024907	SDHAF1	0.714801	0.000362627	0.0134902	3.33925	4.04877
ENSSSCG00000000695	IFFO1	0.720652	0.000361523	0.0134902	1.81283	2.4377
ENSSSCG00000011199	TBC1D5	-1.09952	0.000370009	0.013602	2.83169	1.89028
ENSSSCG00000017274	PITPNC1	-0.961581	0.00037071	0.013602	1.47113	0.973704
ENSSSCG00000013655	ICAM1	-0.722696	0.000368645	0.013602	3.24003	2.67802
ENSSSCG00000034192	GNAO1	1.01472	0.000379518	0.0138777	0.946833	1.60456
ENSSSCG00000007465	B4GALT5	-0.753686	0.000389923	0.0142096	4.80597	4.13854
ENSSSCG00000002852	PLEKHF1	-0.892994	0.000394372	0.0143231	5.23512	4.52516
ENSSSCG00000006340	UAP1	-0.679714	0.000406226	0.0147037	5.28064	4.69594
ENSSSCG00000036933	NR1D1	0.782219	0.000409147	0.0147596	5.2848	6.13773
ENSSSCG00000002252	ARRDC4	-1.39629	0.000410623	0.0147631	3.79411	2.81494
ENSSSCG00000015814		-1.12746	0.000415838	0.0149006	2.80216	1.96286
ENSSSCG00000017366	HDAC5	-0.663375	0.0004283	0.015296	6.95719	6.36908
ENSSSCG00000000958	DYRK2	0.721574	0.00043783	0.0155844	4.68398	5.36712
ENSSSCG00000032115	OSGIN1	-0.842432	0.000444366	0.0157647	6.0071	5.36506
ENSSSCG00000008690	RNF4	0.784033	0.000453858	0.0159955	4.39689	5.23838
ENSSSCG00000037912	FITM2	0.660487	0.000472611	0.0166018	4.55504	5.26545
ENSSSCG00000009672	SCARA5	0.677913	0.000476576	0.0166864	2.82886	3.47691
ENSSSCG00000035212	KLF6	-1.18739	0.000483481	0.0166912	2.89257	1.97056
ENSSSCG00000023031	TNNT2	-1.0846	0.000481575	0.0166912	2.99846	2.27227
ENSSSCG00000027646	TIPARP	-0.941596	0.000485328	0.0166912	5.54354	4.54134
ENSSSCG00000026248	PAQR4	0.735898	0.000479583	0.0166912	2.47546	3.13437
ENSSSCG00000008625	NTSR2	-1.7485	0.000514249	0.0176028	1.87808	0.934655
ENSSSCG00000016851	OSMR	-0.89809	0.000517599	0.017661	3.31996	2.70719
ENSSSCG00000003407	CASZ1	0.658149	0.000522598	0.017775	4.45172	5.12191
ENSSSCG00000008337	AAK1	0.693212	0.000553973	0.0186644	2.8676	3.52288
ENSSSCG00000033786		0.754359	0.000559742	0.0187996	4.12317	4.93238
ENSSSCG00000011496	ADAMTS9	-0.948453	0.000569699	0.0190742	4.28868	3.54428
ENSSSCG00000037190	TAGLN3	-0.698742	0.00057954	0.0193433	2.26239	1.81374
ENSSSCG00000003253		-0.609406	0.000595852	0.0198259	6.14102	5.6605
ENSSSCG00000040751	DDIT3	-0.65431	0.000598837	0.0198636	5.16101	4.57592
ENSSSCG00000004520	MAPK4	-0.799426	0.000601654	0.0198954	1.37434	0.99917
ENSSSCG00000004856	NFATC1	-0.821849	0.000608917	0.0200663	7.72191	7.00548
ENSSSCG00000014915	EED	0.735635	0.000610566	0.0200663	3.1247	3.86146
ENSSSCG00000032164	PEA15	-0.943541	0.000622955	0.0203486	8.64892	7.71381
ENSSSCG00000040890	ABHD14B	0.677782	0.000622701	0.0203486	3.09631	3.74335
ENSSSCG00000026006	KLF13	-0.754548	0.000624932	0.0203511	2.49854	1.9622
ENSSSCG00000004803	ACTC1	-1.16037	0.000632566	0.0205373	5.06122	4.41152
ENSSSCG00000000645	GABARAPL1	-0.630069	0.000638244	0.0205792	5.03854	4.5126
ENSSSCG00000002305	EXD2	0.722888	0.000639617	0.0205792	1.81942	2.42596
ENSSSCG00000015986	HOXD1	1.17565	0.000637582	0.0205792	1.85482	2.68916
ENSSSCG00000017723	CCL2	-0.928736	0.000662412	0.0212487	2.9664	2.34862
ENSSSCG00000017987		0.779154	0.000673647	0.0215446	4.7379	5.54085
ENSSSCG00000000504	PTPRB	-0.77995	0.000676643	0.021576	4.98733	4.29509
ENSSSCG00000032094	DKK2	-1.33105	0.000691583	0.0217397	2.76662	1.74842
ENSSSCG00000011350	CCDC51	0.608594	0.000693948	0.0217397	2.38483	2.95812
ENSSSCG00000010537	GOT1	0.619532	0.000692556	0.0217397	6.62221	7.28509
ENSSSCG00000017214	ARMC7	0.679813	0.00069229	0.0217397	1.22353	1.70361
ENSSSCG00000029944	FASN	1.41272	0.000692248	0.0217397	6.13106	7.11676
ENSSSCG00000011604	CHCHD4	0.680903	0.000706709	0.0220749	2.59954	3.22459
ENSSSCG00000010461	ANKRD1	-1.01119	0.000710569	0.0221309	8.57636	7.58095
ENSSSCG00000017134	FN3KRP	0.64505	0.00071678	0.0221953	1.12665	1.5628
ENSSSCG00000012844	SLC25A22	0.827046	0.000722893	0.0223201	1.80913	2.4321
ENSSSCG00000027480	KLF10	-0.696266	0.000730573	0.0224924	6.34655	5.71209
ENSSSCG00000007034	PSD3	-1.16358	0.00073666	0.0226148	1.78752	1.03431
ENSSSCG00000032728	EFNB1	0.890241	0.000776471	0.0237689	1.57151	2.26893
ENSSSCG00000004142	CITED2	-0.831231	0.000783412	0.0238361	4.34517	3.56511
ENSSSCG00000016956	MAST4	-0.724101	0.000787138	0.0238361	6.5691	5.92006
ENSSSCG00000017137	METRNL	0.907331	0.000786096	0.0238361	3.5554	4.45886
ENSSSCG00000027952	ADCY5	0.762286	0.000801922	0.0242022	1.77305	2.37257
ENSSSCG00000028277		-0.669365	0.000814119	0.0245013	4.2669	3.73853
ENSSSCG00000038423	GLA	-0.659856	0.000819749	0.0245329	2.48816	2.04425
ENSSSCG00000025647	SLC35C1	0.70471	0.000835965	0.0248793	1.55419	2.12228
ENSSSCG00000034708	PITX2	0.651146	0.000845218	0.0250157	2.62587	3.23122
ENSSSCG00000023181	ZNF385B	-0.966024	0.000853224	0.0251139	1.95661	1.36366
ENSSSCG00000001988	ADCY4	-0.609889	0.000852677	0.0251139	3.62958	3.12983
ENSSSCG00000012135	VEGFD	0.730016	0.000858538	0.025201	1.9761	2.61928
ENSSSCG00000001137	HIST1H1D	-0.634892	0.00086837	0.0253546	3.88051	3.38189
ENSSSCG00000033541	NAT8L	0.872336	0.000868503	0.0253546	3.17401	4.04747
ENSSSCG00000011849	TNK2	0.593866	0.000876036	0.025505	4.70895	5.34459
ENSSSCG00000037501	FANCF	0.856814	0.000887176	0.0257594	1.53106	2.1819
ENSSSCG00000029838	FZD2	0.772587	0.000891059	0.0258022	1.42961	1.9877
ENSSSCG00000002383	FOS	-0.786472	0.00090566	0.0261543	8.49449	7.70548
ENSSSCG00000013501	CREB3L3	0.752512	0.00092389	0.0265377	1.28412	1.84407
ENSSSCG00000028117		-0.624551	0.000939075	0.0269017	2.89832	2.42506
ENSSSCG00000029275	PPARGC1A	-1.49823	0.000996837	0.0283292	6.74912	5.1875
ENSSSCG00000002281		0.744567	0.00100747	0.0284802	5.71015	6.48825
ENSSSCG00000008985	SOWAHB	-1.12111	0.00101431	0.0285983	1.51885	0.917081
ENSSSCG00000013113	TMEM132A	0.731434	0.00102006	0.0286848	3.14697	3.84674
ENSSSCG00000030277	ENDOV	0.612653	0.00108366	0.0300787	1.7632	2.30346
ENSSSCG00000022933	EFR3B	0.704887	0.00108014	0.0300787	1.74291	2.33292
ENSSSCG00000003549	LDLRAP1	0.69198	0.0010885	0.030135	2.48929	3.15097
ENSSSCG00000037970	SOX8	0.738791	0.00111335	0.0307435	1.90104	2.52765
ENSSSCG00000012769	ATP2B3	0.703723	0.00112434	0.0309669	3.0634	3.77385
ENSSSCG00000012663	ENOX2	-0.764177	0.00113055	0.0309787	4.17387	3.47404
ENSSSCG00000040445	RND3	-1.16828	0.00114026	0.0311653	5.41284	4.37668
ENSSSCG00000014336	EGR1	-1.01058	0.0011498	0.0313458	6.7257	5.72576
ENSSSCG00000037520		0.769291	0.0011622	0.0316036	2.83945	3.58139
ENSSSCG00000013028	ESRRA	0.621236	0.0012045	0.0326708	5.76419	6.42724
ENSSSCG00000039587		-0.666185	0.00125942	0.0340743	2.839	2.38571
ENSSSCG00000015589	VASH2	1.09777	0.00127411	0.034385	2.52106	3.46861
ENSSSCG00000021386	PTGR1	0.830129	0.0012784	0.0344141	2.50772	3.16516
ENSSSCG00000000499	BEST3	-0.736433	0.00128177	0.0344182	4.79841	4.10234
ENSSSCG00000008464	MTA3	-0.611435	0.00129843	0.0345659	1.69113	1.34703
ENSSSCG00000008881	RAPGEF2	0.770923	0.00129695	0.0345659	4.08736	4.91259
ENSSSCG00000026784	LMNB2	0.597147	0.00131289	0.0348175	4.31924	4.94193
ENSSSCG00000022846	SLC4A3	0.669362	0.00133454	0.0353043	2.06878	2.68116
ENSSSCG00000006893	BCAR3	0.604478	0.00135316	0.0357088	2.83093	3.40672
ENSSSCG00000000487	SLC35E3	1.27974	0.00136432	0.0358268	1.04079	1.81051
ENSSSCG00000029533	SEMA4G	0.683812	0.00137405	0.0359941	1.17502	1.65506
ENSSSCG00000029371	C5AR1	-0.957442	0.00138378	0.0361041	1.89342	1.39003
ENSSSCG00000028606	ZBTB7B	0.87351	0.00138499	0.0361041	4.78054	5.65835
ENSSSCG00000032366	MOB3A	0.600359	0.00141066	0.0365067	3.06408	3.65454
ENSSSCG00000028878	BCAR1	0.730734	0.00143886	0.0371277	4.01555	4.81283
ENSSSCG00000025578	ALDH1A2	0.964858	0.00145813	0.0374637	1.08915	1.71708
ENSSSCG00000002812	KIFC3	0.624771	0.00151541	0.0387496	2.7776	3.41813
ENSSSCG00000023806	LRRN1	-1.05363	0.00152911	0.0389122	1.74577	1.13235
ENSSSCG00000000419	RDH16	0.740104	0.00153229	0.0389122	3.25957	4.03767
ENSSSCG00000007710	MLXIPL	0.965935	0.00153266	0.0389122	2.23942	2.93465
ENSSSCG00000014875	CAPN5	0.711633	0.00153977	0.0390002	2.73564	3.44079
ENSSSCG00000015559	NCF2	-0.871095	0.00156197	0.0394692	1.45761	1.029
ENSSSCG00000010509	PIK3AP1	-1.09284	0.00159316	0.0399686	1.66992	1.1141
ENSSSCG00000027762	TNFRSF11B	-1.02545	0.00159666	0.0399686	2.31609	1.69034
ENSSSCG00000009755	AACS	0.693458	0.00160469	0.040076	2.55966	3.1938
ENSSSCG00000025652	CDH1	-1.04901	0.00160956	0.0401042	2.2684	1.69614
ENSSSCG00000033489	C10orf71	-0.879337	0.00162187	0.0403172	8.98082	8.23413
ENSSSCG00000031420		0.660138	0.00163926	0.0405612	1.76008	2.34114
ENSSSCG00000038727	GDNF	-1.27099	0.00166728	0.0411596	4.24694	2.73466
ENSSSCG00000035863	PLIN2	-0.699765	0.00170345	0.0418596	5.73396	5.12746
ENSSSCG00000021408	TKT	0.727875	0.0017121	0.0419758	4.1228	4.78445
ENSSSCG00000007235	TPX2	-0.855999	0.00173182	0.0422973	2.30162	1.67571
ENSSSCG00000015613	C1orf74	0.615635	0.00173311	0.0422973	3.10758	3.71738
ENSSSCG00000010429	PRKG1	-1.4595	0.0017425	0.0424299	2.39016	1.51146
ENSSSCG00000038132	IRF2BP2	-0.652151	0.00179256	0.0433533	6.60076	6.07428
ENSSSCG00000003590	PTPRU	0.862929	0.00180457	0.0434917	1.26104	1.80535
ENSSSCG00000034494	MARS2	0.681386	0.00181625	0.0436306	1.79553	2.37955
ENSSSCG00000016191		0.592181	0.00182526	0.0436515	3.82523	4.43328
ENSSSCG00000009716	SH3RF1	-0.635813	0.00186148	0.0444184	2.06043	1.68638
ENSSSCG00000032450		0.65057	0.00187019	0.0445272	2.41293	3.06224
ENSSSCG00000007484	ZNF217	-0.86932	0.00188541	0.0447901	2.16195	1.61977
ENSSSCG00000017475	RARA	0.63511	0.00189449	0.044906	3.76393	4.38413
ENSSSCG00000017573	XYLT2	0.63797	0.00190298	0.0449087	2.297	2.8809
ENSSSCG00000013110	TMEM109	0.612363	0.00190773	0.0449219	7.12442	7.78949
ENSSSCG00000036723	EMP1	-0.821595	0.00192154	0.0451477	6.15709	5.55521
ENSSSCG00000015545		-0.814331	0.00193055	0.0451613	8.82474	8.15743
ENSSSCG00000039998	CLIC2	-0.753507	0.00192817	0.0451613	2.93505	2.39959
ENSSSCG00000027342	BAZ1B	0.586106	0.00194173	0.045324	4.97923	5.59151
ENSSSCG00000012029	BACH1	-1.13554	0.00197242	0.0459403	4.12782	3.26566
ENSSSCG00000003616	FAM167B	-0.819958	0.00200391	0.0464036	2.52304	1.96989
ENSSSCG00000008593	KLHL29	0.727741	0.00200531	0.0464036	4.37211	5.15653
ENSSSCG00000012966	C11orf68	0.618931	0.00202315	0.046615	4.88021	5.54461
ENSSSCG00000030626	ALDH1L1	1.0018	0.00203979	0.0468977	2.2813	2.92677
ENSSSCG00000032877		-0.64073	0.00208498	0.0477317	3.63723	3.07734
ENSSSCG00000037766	NR3C2	-0.87554	0.00209672	0.0478981	3.22424	2.49565
ENSSSCG00000015270	FMOD	0.946556	0.00211966	0.0481145	3.76083	4.44128
ENSSSCG00000000571	ABCC9	-0.751051	0.00212447	0.0481216	4.89626	4.19425
ENSSSCG00000006018	TRPS1	-0.932045	0.00214011	0.0483737	1.87045	1.28025
ENSSSCG00000007350	PPP1R16B	0.688877	0.0021475	0.0484385	2.20073	2.89415
ENSSSCG00000011379	KLHDC8B	0.667313	0.00215644	0.0485379	4.03342	4.7037
ENSSSCG00000036331		-0.622561	0.0021816	0.048842	4.85043	4.32469
ENSSSCG00000011401	LSMEM2	0.604301	0.00217949	0.048842	3.58696	4.17491
ENSSSCG00000038144		0.857053	0.00218362	0.048842	2.2303	2.96756
ENSSSCG00000010224	EGR2	-0.880199	0.00224368	0.0499767	2.14875	1.50799
ENSSSCG00000001885	C15orf39	0.759052	0.00224092	0.0499767	2.68029	3.4298
