# Supplementary material for: Co-expression network analysis predicts a key role of microRNAs in the adaptation of the porcine skeletal muscle to nutrient supply
Source: J Anim Sci Biotechnol. 2020 Jan 17;11:10. doi: 10.1186/s40104-019-0412-z (PMC6966835; doi:10.1186/s40104-019-0412-z)
Supplement: Supplementary file 7 — Additional file 7: Table S7. mRNA-to-mRNA significant interactions detected with the PCIT algorithm in the AL-T0/AL-T1 and AL-T0/AL-T2 contrasts. [file 40104_2019_412_MOESM7_ESM.xlsx]

## Sheet: PCIT_ALT0ALT1_mRNAs
Table S7: mRNA-to-mRNA interactions detected as relevant by PCIT in the AL-T0/AL-T1 contrast.
From	To	Weight
ENSSSCG00000000078	ENSSSCG00000004490	0.856603
ENSSSCG00000000078	ENSSSCG00000013351	0.718062
ENSSSCG00000000078	ENSSSCG00000017983	0.719604
ENSSSCG00000000078	ENSSSCG00000021273	0.731805
ENSSSCG00000000078	ENSSSCG00000023806	0.704876
ENSSSCG00000000078	ENSSSCG00000028056	0.734339
ENSSSCG00000000078	ENSSSCG00000031744	0.741683
ENSSSCG00000000078	ENSSSCG00000035037	0.768798
ENSSSCG00000000078	ENSSSCG00000040366	0.72009
ENSSSCG00000000078	ENSSSCG00000040728	0.71055
ENSSSCG00000000078	ENSSSCG00000006331	0.715164
ENSSSCG00000000078	ENSSSCG00000010739	0.834047
ENSSSCG00000000078	ENSSSCG00000015871	0.846854
ENSSSCG00000000078	ENSSSCG00000017546	0.792306
ENSSSCG00000000078	ENSSSCG00000026006	0.715914
ENSSSCG00000000078	ENSSSCG00000030095	0.714853
ENSSSCG00000000078	ENSSSCG00000037766	0.761661
ENSSSCG00000000078	ENSSSCG00000038911	0.710019
ENSSSCG00000000078	ENSSSCG00000040607	0.719948
ENSSSCG00000000504	ENSSSCG00000001921	0.723706
ENSSSCG00000000504	ENSSSCG00000002252	0.726323
ENSSSCG00000000504	ENSSSCG00000002283	0.792702
ENSSSCG00000000504	ENSSSCG00000004789	0.782535
ENSSSCG00000000504	ENSSSCG00000005437	0.813285
ENSSSCG00000000504	ENSSSCG00000006023	0.813451
ENSSSCG00000000504	ENSSSCG00000006231	0.849169
ENSSSCG00000000504	ENSSSCG00000006277	0.709653
ENSSSCG00000000504	ENSSSCG00000006290	0.75606
ENSSSCG00000000504	ENSSSCG00000006970	0.919744
ENSSSCG00000000504	ENSSSCG00000008374	0.723203
ENSSSCG00000000504	ENSSSCG00000009152	0.712107
ENSSSCG00000000504	ENSSSCG00000010455	0.804703
ENSSSCG00000000504	ENSSSCG00000011075	0.708542
ENSSSCG00000000504	ENSSSCG00000011496	0.917955
ENSSSCG00000000504	ENSSSCG00000012026	0.853374
ENSSSCG00000000504	ENSSSCG00000012110	0.824332
ENSSSCG00000000504	ENSSSCG00000014156	0.755848
ENSSSCG00000000504	ENSSSCG00000014168	0.796234
ENSSSCG00000000504	ENSSSCG00000014251	0.764432
ENSSSCG00000000504	ENSSSCG00000015037	0.794134
ENSSSCG00000000504	ENSSSCG00000015519	0.885458
ENSSSCG00000000504	ENSSSCG00000015814	0.858447
ENSSSCG00000000504	ENSSSCG00000016824	0.883828
ENSSSCG00000000504	ENSSSCG00000016898	0.881512
ENSSSCG00000000504	ENSSSCG00000017607	0.786785
ENSSSCG00000000504	ENSSSCG00000021273	0.756801
ENSSSCG00000000504	ENSSSCG00000022925	0.742217
ENSSSCG00000000504	ENSSSCG00000023105	0.84762
ENSSSCG00000000504	ENSSSCG00000023133	0.759936
ENSSSCG00000000504	ENSSSCG00000025698	0.79039
ENSSSCG00000000504	ENSSSCG00000031744	0.803534
ENSSSCG00000000504	ENSSSCG00000032320	0.887611
ENSSSCG00000000504	ENSSSCG00000033175	0.832832
ENSSSCG00000000504	ENSSSCG00000036555	0.810779
ENSSSCG00000000504	ENSSSCG00000036787	0.855546
ENSSSCG00000000504	ENSSSCG00000037201	0.700814
ENSSSCG00000000504	ENSSSCG00000038132	0.83924
ENSSSCG00000000504	ENSSSCG00000038149	0.797269
ENSSSCG00000000504	ENSSSCG00000038500	0.714712
ENSSSCG00000000504	ENSSSCG00000038594	0.730042
ENSSSCG00000000504	ENSSSCG00000040728	0.75378
ENSSSCG00000000504	ENSSSCG00000001049	0.718435
ENSSSCG00000000504	ENSSSCG00000001061	0.730054
ENSSSCG00000000504	ENSSSCG00000001611	0.764841
ENSSSCG00000000504	ENSSSCG00000004127	0.700677
ENSSSCG00000000504	ENSSSCG00000004387	0.75387
ENSSSCG00000000504	ENSSSCG00000004505	0.705701
ENSSSCG00000000504	ENSSSCG00000007484	0.8876
ENSSSCG00000000504	ENSSSCG00000009682	0.746043
ENSSSCG00000000504	ENSSSCG00000009865	0.838996
ENSSSCG00000000504	ENSSSCG00000010224	0.780612
ENSSSCG00000000504	ENSSSCG00000011125	0.749959
ENSSSCG00000000504	ENSSSCG00000011594	0.753005
ENSSSCG00000000504	ENSSSCG00000013501	-0.705176
ENSSSCG00000000504	ENSSSCG00000015235	0.757739
ENSSSCG00000000504	ENSSSCG00000015237	0.833914
ENSSSCG00000000504	ENSSSCG00000015357	0.763951
ENSSSCG00000000504	ENSSSCG00000021646	0.7855
ENSSSCG00000000504	ENSSSCG00000022760	0.81291
ENSSSCG00000000504	ENSSSCG00000024970	0.773178
ENSSSCG00000000504	ENSSSCG00000029998	0.788167
ENSSSCG00000000504	ENSSSCG00000030095	0.724498
ENSSSCG00000000504	ENSSSCG00000032527	0.706447
ENSSSCG00000000504	ENSSSCG00000039161	0.700115
ENSSSCG00000000504	ENSSSCG00000039568	0.76463
ENSSSCG00000001347	ENSSSCG00000001921	0.732684
ENSSSCG00000001347	ENSSSCG00000011133	0.70203
ENSSSCG00000001347	ENSSSCG00000013351	0.782563
ENSSSCG00000001347	ENSSSCG00000015541	0.876398
ENSSSCG00000001347	ENSSSCG00000015550	0.738355
ENSSSCG00000001347	ENSSSCG00000017983	0.75346
ENSSSCG00000001347	ENSSSCG00000028056	0.800058
ENSSSCG00000001347	ENSSSCG00000028322	0.750497
ENSSSCG00000001347	ENSSSCG00000035037	0.823801
ENSSSCG00000001347	ENSSSCG00000038374	0.733688
ENSSSCG00000001347	ENSSSCG00000038500	0.709516
ENSSSCG00000001347	ENSSSCG00000039419	0.760264
ENSSSCG00000001347	ENSSSCG00000040366	0.833956
ENSSSCG00000001347	ENSSSCG00000000396	0.716703
ENSSSCG00000001347	ENSSSCG00000002383	0.724984
ENSSSCG00000001347	ENSSSCG00000005965	0.710102
ENSSSCG00000001347	ENSSSCG00000008443	0.741656
ENSSSCG00000001347	ENSSSCG00000010638	0.710929
ENSSSCG00000001347	ENSSSCG00000012656	0.763694
ENSSSCG00000001347	ENSSSCG00000026006	0.800112
ENSSSCG00000001347	ENSSSCG00000031321	0.805922
ENSSSCG00000001347	ENSSSCG00000031616	0.718817
ENSSSCG00000001347	ENSSSCG00000032171	0.754284
ENSSSCG00000001347	ENSSSCG00000038911	0.820286
ENSSSCG00000001347	ENSSSCG00000038948	0.731899
ENSSSCG00000001411	ENSSSCG00000005669	0.757375
ENSSSCG00000001411	ENSSSCG00000010517	0.736652
ENSSSCG00000001411	ENSSSCG00000013178	0.782043
ENSSSCG00000001411	ENSSSCG00000017528	0.720331
ENSSSCG00000001411	ENSSSCG00000034494	0.773646
ENSSSCG00000001411	ENSSSCG00000039867	0.750871
ENSSSCG00000001411	ENSSSCG00000007117	0.741497
ENSSSCG00000001411	ENSSSCG00000015112	0.711995
ENSSSCG00000001411	ENSSSCG00000016690	-0.706107
ENSSSCG00000001411	ENSSSCG00000017950	0.710493
ENSSSCG00000001411	ENSSSCG00000028190	0.896181
ENSSSCG00000001411	ENSSSCG00000034708	0.716997
ENSSSCG00000001411	ENSSSCG00000036340	0.75806
ENSSSCG00000001892	ENSSSCG00000002392	0.867494
ENSSSCG00000001892	ENSSSCG00000004215	-0.744755
ENSSSCG00000001892	ENSSSCG00000005648	0.837027
ENSSSCG00000001892	ENSSSCG00000005669	0.765396
ENSSSCG00000001892	ENSSSCG00000006698	0.783376
ENSSSCG00000001892	ENSSSCG00000007993	0.757702
ENSSSCG00000001892	ENSSSCG00000008349	0.794278
ENSSSCG00000001892	ENSSSCG00000009605	0.713786
ENSSSCG00000001892	ENSSSCG00000009801	0.714617
ENSSSCG00000001892	ENSSSCG00000010517	0.806017
ENSSSCG00000001892	ENSSSCG00000013178	0.902107
ENSSSCG00000001892	ENSSSCG00000015283	0.870705
ENSSSCG00000001892	ENSSSCG00000017414	0.932097
ENSSSCG00000001892	ENSSSCG00000017528	0.942059
ENSSSCG00000001892	ENSSSCG00000017727	0.836042
ENSSSCG00000001892	ENSSSCG00000017885	0.808628
ENSSSCG00000001892	ENSSSCG00000021436	0.805622
ENSSSCG00000001892	ENSSSCG00000021638	0.883511
ENSSSCG00000001892	ENSSSCG00000022687	0.817139
ENSSSCG00000001892	ENSSSCG00000034494	0.730227
ENSSSCG00000001892	ENSSSCG00000036030	0.843177
ENSSSCG00000001892	ENSSSCG00000000258	0.733563
ENSSSCG00000001892	ENSSSCG00000000702	0.733097
ENSSSCG00000001892	ENSSSCG00000000736	0.702654
ENSSSCG00000001892	ENSSSCG00000001438	0.704161
ENSSSCG00000001892	ENSSSCG00000001474	0.717989
ENSSSCG00000001892	ENSSSCG00000001619	0.8114
ENSSSCG00000001892	ENSSSCG00000002769	0.738469
ENSSSCG00000001892	ENSSSCG00000003030	0.700644
ENSSSCG00000001892	ENSSSCG00000003407	0.74592
ENSSSCG00000001892	ENSSSCG00000005318	0.706214
ENSSSCG00000001892	ENSSSCG00000007958	0.720456
ENSSSCG00000001892	ENSSSCG00000012029	-0.701931
ENSSSCG00000001892	ENSSSCG00000012287	0.835264
ENSSSCG00000001892	ENSSSCG00000012981	0.765985
ENSSSCG00000001892	ENSSSCG00000013764	0.730357
ENSSSCG00000001892	ENSSSCG00000015987	-0.7128
ENSSSCG00000001892	ENSSSCG00000016690	-0.712336
ENSSSCG00000001892	ENSSSCG00000017475	0.824754
ENSSSCG00000001892	ENSSSCG00000017516	0.743281
ENSSSCG00000001892	ENSSSCG00000017950	0.75824
ENSSSCG00000001892	ENSSSCG00000026103	0.780341
ENSSSCG00000001892	ENSSSCG00000028104	0.778136
ENSSSCG00000001892	ENSSSCG00000028190	0.703208
ENSSSCG00000001892	ENSSSCG00000029998	-0.727141
ENSSSCG00000001892	ENSSSCG00000034654	0.806717
ENSSSCG00000001892	ENSSSCG00000034708	0.78352
ENSSSCG00000001892	ENSSSCG00000036340	0.711605
ENSSSCG00000001892	ENSSSCG00000036933	0.729672
ENSSSCG00000001892	ENSSSCG00000037762	0.794177
ENSSSCG00000001892	ENSSSCG00000037970	0.772074
ENSSSCG00000001921	ENSSSCG00000004490	0.728429
ENSSSCG00000001921	ENSSSCG00000005437	0.787122
ENSSSCG00000001921	ENSSSCG00000006023	0.757977
ENSSSCG00000001921	ENSSSCG00000006231	0.703389
ENSSSCG00000001921	ENSSSCG00000009216	0.702659
ENSSSCG00000001921	ENSSSCG00000010464	0.753134
ENSSSCG00000001921	ENSSSCG00000011075	0.750053
ENSSSCG00000001921	ENSSSCG00000011076	0.810796
ENSSSCG00000001921	ENSSSCG00000013351	0.862953
ENSSSCG00000001921	ENSSSCG00000015037	0.762007
ENSSSCG00000001921	ENSSSCG00000015519	0.793266
ENSSSCG00000001921	ENSSSCG00000015541	0.764389
ENSSSCG00000001921	ENSSSCG00000015550	0.733176
ENSSSCG00000001921	ENSSSCG00000017986	0.705388
ENSSSCG00000001921	ENSSSCG00000021273	0.706685
ENSSSCG00000001921	ENSSSCG00000023105	0.80656
ENSSSCG00000001921	ENSSSCG00000023133	0.746044
ENSSSCG00000001921	ENSSSCG00000024416	0.714371
ENSSSCG00000001921	ENSSSCG00000028056	0.736507
ENSSSCG00000001921	ENSSSCG00000028322	0.801525
ENSSSCG00000001921	ENSSSCG00000029507	0.753442
ENSSSCG00000001921	ENSSSCG00000031262	0.711071
ENSSSCG00000001921	ENSSSCG00000031744	0.803342
ENSSSCG00000001921	ENSSSCG00000035037	0.842856
ENSSSCG00000001921	ENSSSCG00000036555	0.749403
ENSSSCG00000001921	ENSSSCG00000037201	0.733421
ENSSSCG00000001921	ENSSSCG00000038132	0.73463
ENSSSCG00000001921	ENSSSCG00000038149	0.834798
ENSSSCG00000001921	ENSSSCG00000038500	0.772463
ENSSSCG00000001921	ENSSSCG00000038594	0.71071
ENSSSCG00000001921	ENSSSCG00000038727	0.836401
ENSSSCG00000001921	ENSSSCG00000040366	0.762203
ENSSSCG00000001921	ENSSSCG00000002838	0.744537
ENSSSCG00000001921	ENSSSCG00000006625	0.746985
ENSSSCG00000001921	ENSSSCG00000006646	0.776607
ENSSSCG00000001921	ENSSSCG00000008443	0.712675
ENSSSCG00000001921	ENSSSCG00000009865	0.752357
ENSSSCG00000001921	ENSSSCG00000010224	0.851999
ENSSSCG00000001921	ENSSSCG00000010638	0.712925
ENSSSCG00000001921	ENSSSCG00000011125	0.724226
ENSSSCG00000001921	ENSSSCG00000015595	0.722099
ENSSSCG00000001921	ENSSSCG00000015871	0.774645
ENSSSCG00000001921	ENSSSCG00000017376	0.762551
ENSSSCG00000001921	ENSSSCG00000017546	0.787651
ENSSSCG00000001921	ENSSSCG00000026533	0.766814
ENSSSCG00000001921	ENSSSCG00000029578	0.767467
ENSSSCG00000001921	ENSSSCG00000031321	0.737681
ENSSSCG00000001921	ENSSSCG00000032527	0.70092
ENSSSCG00000001921	ENSSSCG00000038911	0.870981
ENSSSCG00000001921	ENSSSCG00000038948	0.751996
ENSSSCG00000001921	ENSSSCG00000039161	0.704384
ENSSSCG00000002252	ENSSSCG00000002283	0.737544
ENSSSCG00000002252	ENSSSCG00000004215	0.725567
ENSSSCG00000002252	ENSSSCG00000004490	0.720521
ENSSSCG00000002252	ENSSSCG00000005437	0.782714
ENSSSCG00000002252	ENSSSCG00000006231	0.789246
ENSSSCG00000002252	ENSSSCG00000006970	0.844191
ENSSSCG00000002252	ENSSSCG00000008374	0.815025
ENSSSCG00000002252	ENSSSCG00000009152	0.714385
ENSSSCG00000002252	ENSSSCG00000010455	0.794963
ENSSSCG00000002252	ENSSSCG00000011451	0.726092
ENSSSCG00000002252	ENSSSCG00000011496	0.799567
ENSSSCG00000002252	ENSSSCG00000012026	0.736803
ENSSSCG00000002252	ENSSSCG00000014156	0.769026
ENSSSCG00000002252	ENSSSCG00000014168	0.898131
ENSSSCG00000002252	ENSSSCG00000015037	0.708075
ENSSSCG00000002252	ENSSSCG00000015814	0.757114
ENSSSCG00000002252	ENSSSCG00000016824	0.789691
ENSSSCG00000002252	ENSSSCG00000016898	0.7849
ENSSSCG00000002252	ENSSSCG00000017607	0.749787
ENSSSCG00000002252	ENSSSCG00000031262	0.758538
ENSSSCG00000002252	ENSSSCG00000031744	0.718078
ENSSSCG00000002252	ENSSSCG00000032320	0.808393
ENSSSCG00000002252	ENSSSCG00000033175	0.838115
ENSSSCG00000002252	ENSSSCG00000034494	-0.703337
ENSSSCG00000002252	ENSSSCG00000038132	0.760484
ENSSSCG00000002252	ENSSSCG00000040728	0.898539
ENSSSCG00000002252	ENSSSCG00000000902	0.731101
ENSSSCG00000002252	ENSSSCG00000001708	0.744725
ENSSSCG00000002252	ENSSSCG00000002254	0.722937
ENSSSCG00000002252	ENSSSCG00000004127	0.744885
ENSSSCG00000002252	ENSSSCG00000004505	0.750083
ENSSSCG00000002252	ENSSSCG00000004600	0.834341
ENSSSCG00000002252	ENSSSCG00000004739	0.713685
ENSSSCG00000002252	ENSSSCG00000005096	0.812427
ENSSSCG00000002252	ENSSSCG00000005604	0.739773
ENSSSCG00000002252	ENSSSCG00000006018	0.763455
ENSSSCG00000002252	ENSSSCG00000006155	0.70437
ENSSSCG00000002252	ENSSSCG00000006331	0.762059
ENSSSCG00000002252	ENSSSCG00000006346	0.748308
ENSSSCG00000002252	ENSSSCG00000007311	0.828979
ENSSSCG00000002252	ENSSSCG00000007484	0.765204
ENSSSCG00000002252	ENSSSCG00000008099	0.700851
ENSSSCG00000002252	ENSSSCG00000009440	0.759369
ENSSSCG00000002252	ENSSSCG00000009865	0.771264
ENSSSCG00000002252	ENSSSCG00000011810	0.742574
ENSSSCG00000002252	ENSSSCG00000011951	0.80157
ENSSSCG00000002252	ENSSSCG00000012029	0.706037
ENSSSCG00000002252	ENSSSCG00000012620	0.751979
ENSSSCG00000002252	ENSSSCG00000013501	-0.713424
ENSSSCG00000002252	ENSSSCG00000015235	0.882904
ENSSSCG00000002252	ENSSSCG00000015357	0.766999
ENSSSCG00000002252	ENSSSCG00000015568	0.730648
ENSSSCG00000002252	ENSSSCG00000015871	0.775147
ENSSSCG00000002252	ENSSSCG00000016057	0.720223
ENSSSCG00000002252	ENSSSCG00000021343	0.745615
ENSSSCG00000002252	ENSSSCG00000021646	0.823789
ENSSSCG00000002252	ENSSSCG00000022318	0.786219
ENSSSCG00000002252	ENSSSCG00000023357	0.776811
ENSSSCG00000002252	ENSSSCG00000024970	0.747026
ENSSSCG00000002252	ENSSSCG00000025182	0.735913
ENSSSCG00000002252	ENSSSCG00000025777	0.753915
ENSSSCG00000002252	ENSSSCG00000026894	0.701864
ENSSSCG00000002252	ENSSSCG00000027017	0.740357
ENSSSCG00000002252	ENSSSCG00000029920	0.756434
ENSSSCG00000002252	ENSSSCG00000029998	0.823732
ENSSSCG00000002252	ENSSSCG00000032080	0.713963
ENSSSCG00000002252	ENSSSCG00000032372	0.812534
ENSSSCG00000002252	ENSSSCG00000034395	0.705728
ENSSSCG00000002252	ENSSSCG00000035212	0.78356
ENSSSCG00000002252	ENSSSCG00000036546	0.78817
ENSSSCG00000002252	ENSSSCG00000037647	0.714034
ENSSSCG00000002252	ENSSSCG00000037766	0.764232
ENSSSCG00000002283	ENSSSCG00000005437	0.71126
ENSSSCG00000002283	ENSSSCG00000006231	0.829452
ENSSSCG00000002283	ENSSSCG00000006277	0.727431
ENSSSCG00000002283	ENSSSCG00000006970	0.805721
ENSSSCG00000002283	ENSSSCG00000008374	0.797021
ENSSSCG00000002283	ENSSSCG00000010455	0.757847
ENSSSCG00000002283	ENSSSCG00000011496	0.804307
ENSSSCG00000002283	ENSSSCG00000012026	0.738578
ENSSSCG00000002283	ENSSSCG00000014156	0.823222
ENSSSCG00000002283	ENSSSCG00000014168	0.75395
ENSSSCG00000002283	ENSSSCG00000014251	0.746164
ENSSSCG00000002283	ENSSSCG00000015814	0.727169
ENSSSCG00000002283	ENSSSCG00000016824	0.884042
ENSSSCG00000002283	ENSSSCG00000023105	0.83256
ENSSSCG00000002283	ENSSSCG00000025698	0.704802
ENSSSCG00000002283	ENSSSCG00000031262	0.769015
ENSSSCG00000002283	ENSSSCG00000031744	0.713629
ENSSSCG00000002283	ENSSSCG00000032320	0.817978
ENSSSCG00000002283	ENSSSCG00000033175	0.714939
ENSSSCG00000002283	ENSSSCG00000036555	0.714485
ENSSSCG00000002283	ENSSSCG00000001061	0.752964
ENSSSCG00000002283	ENSSSCG00000001611	0.724561
ENSSSCG00000002283	ENSSSCG00000004138	0.720434
ENSSSCG00000002283	ENSSSCG00000004332	0.755675
ENSSSCG00000002283	ENSSSCG00000004739	0.712888
ENSSSCG00000002283	ENSSSCG00000006018	0.774275
ENSSSCG00000002283	ENSSSCG00000007484	0.797921
ENSSSCG00000002283	ENSSSCG00000009865	0.777415
ENSSSCG00000002283	ENSSSCG00000010224	0.755179
ENSSSCG00000002283	ENSSSCG00000011125	0.742998
ENSSSCG00000002283	ENSSSCG00000015235	0.713712
ENSSSCG00000002283	ENSSSCG00000021646	0.778566
ENSSSCG00000002283	ENSSSCG00000022760	0.744609
ENSSSCG00000002283	ENSSSCG00000024970	0.724721
ENSSSCG00000002283	ENSSSCG00000029998	0.753513
ENSSSCG00000002283	ENSSSCG00000035673	0.712921
ENSSSCG00000002283	ENSSSCG00000039161	0.708809
ENSSSCG00000002392	ENSSSCG00000004215	-0.761238
ENSSSCG00000002392	ENSSSCG00000005648	0.700359
ENSSSCG00000002392	ENSSSCG00000007993	0.772984
ENSSSCG00000002392	ENSSSCG00000008349	0.704751
ENSSSCG00000002392	ENSSSCG00000009605	0.703225
ENSSSCG00000002392	ENSSSCG00000009801	0.715016
ENSSSCG00000002392	ENSSSCG00000010517	0.745377
ENSSSCG00000002392	ENSSSCG00000013178	0.81366
ENSSSCG00000002392	ENSSSCG00000015283	0.836761
ENSSSCG00000002392	ENSSSCG00000017414	0.866285
ENSSSCG00000002392	ENSSSCG00000017528	0.781813
ENSSSCG00000002392	ENSSSCG00000017727	0.814955
ENSSSCG00000002392	ENSSSCG00000017885	0.755962
ENSSSCG00000002392	ENSSSCG00000021359	0.712378
ENSSSCG00000002392	ENSSSCG00000021436	0.763584
ENSSSCG00000002392	ENSSSCG00000021638	0.863832
ENSSSCG00000002392	ENSSSCG00000022687	0.884464
ENSSSCG00000002392	ENSSSCG00000036030	0.889721
ENSSSCG00000002392	ENSSSCG00000000258	0.748779
ENSSSCG00000002392	ENSSSCG00000001619	0.70428
ENSSSCG00000002392	ENSSSCG00000003407	0.726422
ENSSSCG00000002392	ENSSSCG00000005589	-0.729955
ENSSSCG00000002392	ENSSSCG00000012287	0.733725
ENSSSCG00000002392	ENSSSCG00000013375	0.771666
ENSSSCG00000002392	ENSSSCG00000013764	0.701837
ENSSSCG00000002392	ENSSSCG00000013873	0.728272
ENSSSCG00000002392	ENSSSCG00000017475	0.770802
ENSSSCG00000002392	ENSSSCG00000020801	0.747298
ENSSSCG00000002392	ENSSSCG00000026103	0.724952
ENSSSCG00000002392	ENSSSCG00000031562	0.735184
ENSSSCG00000002392	ENSSSCG00000034654	0.787886
ENSSSCG00000002392	ENSSSCG00000037762	0.705736
ENSSSCG00000002392	ENSSSCG00000037970	0.819588
ENSSSCG00000004012	ENSSSCG00000004399	0.716445
ENSSSCG00000004012	ENSSSCG00000023714	0.729991
ENSSSCG00000004154	ENSSSCG00000006698	0.706412
ENSSSCG00000004154	ENSSSCG00000008349	0.738219
ENSSSCG00000004154	ENSSSCG00000021638	0.729367
ENSSSCG00000004154	ENSSSCG00000023714	0.737823
ENSSSCG00000004154	ENSSSCG00000013397	0.770203
ENSSSCG00000004215	ENSSSCG00000005437	0.818615
ENSSSCG00000004215	ENSSSCG00000005648	-0.770905
ENSSSCG00000004215	ENSSSCG00000005669	-0.77325
ENSSSCG00000004215	ENSSSCG00000006231	0.703032
ENSSSCG00000004215	ENSSSCG00000006970	0.742918
ENSSSCG00000004215	ENSSSCG00000007993	-0.728283
ENSSSCG00000004215	ENSSSCG00000008374	0.778555
ENSSSCG00000004215	ENSSSCG00000011076	0.771863
ENSSSCG00000004215	ENSSSCG00000012026	0.776207
ENSSSCG00000004215	ENSSSCG00000013178	-0.726459
ENSSSCG00000004215	ENSSSCG00000014156	0.793887
ENSSSCG00000004215	ENSSSCG00000014168	0.811859
ENSSSCG00000004215	ENSSSCG00000016824	0.735398
ENSSSCG00000004215	ENSSSCG00000017414	-0.791924
ENSSSCG00000004215	ENSSSCG00000017528	-0.773648
ENSSSCG00000004215	ENSSSCG00000017727	-0.764021
ENSSSCG00000004215	ENSSSCG00000017885	-0.738791
ENSSSCG00000004215	ENSSSCG00000021436	-0.776966
ENSSSCG00000004215	ENSSSCG00000021638	-0.727564
ENSSSCG00000004215	ENSSSCG00000031744	0.791549
ENSSSCG00000004215	ENSSSCG00000032320	0.771622
ENSSSCG00000004215	ENSSSCG00000038149	0.727549
ENSSSCG00000004215	ENSSSCG00000004138	0.717486
ENSSSCG00000004215	ENSSSCG00000004535	0.726316
ENSSSCG00000004215	ENSSSCG00000004576	0.819537
ENSSSCG00000004215	ENSSSCG00000004739	0.764603
ENSSSCG00000004215	ENSSSCG00000006018	0.896007
ENSSSCG00000004215	ENSSSCG00000006155	0.802985
ENSSSCG00000004215	ENSSSCG00000006331	0.714902
ENSSSCG00000004215	ENSSSCG00000007767	-0.703374
ENSSSCG00000004215	ENSSSCG00000008099	0.797284
ENSSSCG00000004215	ENSSSCG00000008334	0.708716
ENSSSCG00000004215	ENSSSCG00000008388	0.773055
ENSSSCG00000004215	ENSSSCG00000009865	0.755273
ENSSSCG00000004215	ENSSSCG00000010219	0.798189
ENSSSCG00000004215	ENSSSCG00000010224	0.72894
ENSSSCG00000004215	ENSSSCG00000011025	0.753121
ENSSSCG00000004215	ENSSSCG00000011125	0.780503
ENSSSCG00000004215	ENSSSCG00000011743	0.713639
ENSSSCG00000004215	ENSSSCG00000011951	0.841767
ENSSSCG00000004215	ENSSSCG00000012029	0.79927
ENSSSCG00000004215	ENSSSCG00000014149	0.711463
ENSSSCG00000004215	ENSSSCG00000014401	0.708422
ENSSSCG00000004215	ENSSSCG00000015235	0.768018
ENSSSCG00000004215	ENSSSCG00000015393	0.712002
ENSSSCG00000004215	ENSSSCG00000015871	0.726634
ENSSSCG00000004215	ENSSSCG00000015987	0.722701
ENSSSCG00000004215	ENSSSCG00000016690	0.804817
ENSSSCG00000004215	ENSSSCG00000017475	-0.704513
ENSSSCG00000004215	ENSSSCG00000021343	0.759683
ENSSSCG00000004215	ENSSSCG00000021646	0.752487
ENSSSCG00000004215	ENSSSCG00000026894	0.70975
ENSSSCG00000004215	ENSSSCG00000027017	0.778174
ENSSSCG00000004215	ENSSSCG00000029998	0.860727
ENSSSCG00000004215	ENSSSCG00000032372	0.799321
ENSSSCG00000004215	ENSSSCG00000034654	-0.754042
ENSSSCG00000004215	ENSSSCG00000035212	0.857776
ENSSSCG00000004215	ENSSSCG00000037762	-0.758758
ENSSSCG00000004215	ENSSSCG00000037766	0.784245
ENSSSCG00000004399	ENSSSCG00000009801	0.748275
ENSSSCG00000004399	ENSSSCG00000021359	0.762887
ENSSSCG00000004399	ENSSSCG00000023714	0.748751
ENSSSCG00000004399	ENSSSCG00000034708	0.709806
ENSSSCG00000004490	ENSSSCG00000005437	0.707875
ENSSSCG00000004490	ENSSSCG00000006023	0.793311
ENSSSCG00000004490	ENSSSCG00000006231	0.75479
ENSSSCG00000004490	ENSSSCG00000006970	0.754131
ENSSSCG00000004490	ENSSSCG00000014168	0.743228
ENSSSCG00000004490	ENSSSCG00000016898	0.725199
ENSSSCG00000004490	ENSSSCG00000021273	0.802524
ENSSSCG00000004490	ENSSSCG00000023806	0.840194
ENSSSCG00000004490	ENSSSCG00000031744	0.818656
ENSSSCG00000004490	ENSSSCG00000033175	0.717014
ENSSSCG00000004490	ENSSSCG00000038132	0.73609
ENSSSCG00000004490	ENSSSCG00000038149	0.702674
ENSSSCG00000004490	ENSSSCG00000038500	0.713221
ENSSSCG00000004490	ENSSSCG00000040728	0.79283
ENSSSCG00000004490	ENSSSCG00000002752	0.722969
ENSSSCG00000004490	ENSSSCG00000006018	0.80187
ENSSSCG00000004490	ENSSSCG00000006331	0.814712
ENSSSCG00000004490	ENSSSCG00000015871	0.842685
ENSSSCG00000004490	ENSSSCG00000016690	0.719094
ENSSSCG00000004490	ENSSSCG00000017546	0.730434
ENSSSCG00000004490	ENSSSCG00000025777	0.738774
ENSSSCG00000004490	ENSSSCG00000029998	0.7694
ENSSSCG00000004490	ENSSSCG00000037766	0.785494
ENSSSCG00000004789	ENSSSCG00000005437	0.770418
ENSSSCG00000004789	ENSSSCG00000006231	0.741624
ENSSSCG00000004789	ENSSSCG00000006277	0.705594
ENSSSCG00000004789	ENSSSCG00000006359	0.833951
ENSSSCG00000004789	ENSSSCG00000006970	0.803118
ENSSSCG00000004789	ENSSSCG00000008374	0.762142
ENSSSCG00000004789	ENSSSCG00000009152	0.761033
ENSSSCG00000004789	ENSSSCG00000009216	0.72493
ENSSSCG00000004789	ENSSSCG00000010455	0.75132
ENSSSCG00000004789	ENSSSCG00000011496	0.875186
ENSSSCG00000004789	ENSSSCG00000012026	0.893491
ENSSSCG00000004789	ENSSSCG00000012110	0.743006
ENSSSCG00000004789	ENSSSCG00000014168	0.768145
ENSSSCG00000004789	ENSSSCG00000015037	0.79949
ENSSSCG00000004789	ENSSSCG00000015519	0.80486
ENSSSCG00000004789	ENSSSCG00000015550	0.716845
ENSSSCG00000004789	ENSSSCG00000015814	0.824677
ENSSSCG00000004789	ENSSSCG00000016824	0.820947
ENSSSCG00000004789	ENSSSCG00000017607	0.78628
ENSSSCG00000004789	ENSSSCG00000022925	0.901254
ENSSSCG00000004789	ENSSSCG00000023133	0.718132
ENSSSCG00000004789	ENSSSCG00000025698	0.866057
ENSSSCG00000004789	ENSSSCG00000032320	0.780985
ENSSSCG00000004789	ENSSSCG00000033175	0.79521
ENSSSCG00000004789	ENSSSCG00000036555	0.748416
ENSSSCG00000004789	ENSSSCG00000036787	0.756655
ENSSSCG00000004789	ENSSSCG00000038149	0.788939
ENSSSCG00000004789	ENSSSCG00000038500	0.727158
ENSSSCG00000004789	ENSSSCG00000001049	0.721913
ENSSSCG00000004789	ENSSSCG00000004332	0.701422
ENSSSCG00000004789	ENSSSCG00000005965	0.759486
ENSSSCG00000004789	ENSSSCG00000006018	0.727046
ENSSSCG00000004789	ENSSSCG00000006625	0.703848
ENSSSCG00000004789	ENSSSCG00000007477	0.712861
ENSSSCG00000004789	ENSSSCG00000007484	0.751262
ENSSSCG00000004789	ENSSSCG00000009865	0.779043
ENSSSCG00000004789	ENSSSCG00000010224	0.859314
ENSSSCG00000004789	ENSSSCG00000011125	0.726756
ENSSSCG00000004789	ENSSSCG00000011810	0.751323
ENSSSCG00000004789	ENSSSCG00000011951	0.771583
ENSSSCG00000004789	ENSSSCG00000016573	0.70273
ENSSSCG00000004789	ENSSSCG00000024152	0.725906
ENSSSCG00000004789	ENSSSCG00000032367	0.717411
ENSSSCG00000004789	ENSSSCG00000032527	0.704248
ENSSSCG00000004789	ENSSSCG00000035212	0.7277
ENSSSCG00000005437	ENSSSCG00000005669	-0.732636
ENSSSCG00000005437	ENSSSCG00000006023	0.751512
ENSSSCG00000005437	ENSSSCG00000006231	0.763078
ENSSSCG00000005437	ENSSSCG00000006277	0.731339
ENSSSCG00000005437	ENSSSCG00000006290	0.831546
ENSSSCG00000005437	ENSSSCG00000006359	0.713429
ENSSSCG00000005437	ENSSSCG00000006970	0.815017
ENSSSCG00000005437	ENSSSCG00000008374	0.773238
ENSSSCG00000005437	ENSSSCG00000009152	0.852069
ENSSSCG00000005437	ENSSSCG00000011075	0.749673
ENSSSCG00000005437	ENSSSCG00000011076	0.828435
ENSSSCG00000005437	ENSSSCG00000011496	0.793397
ENSSSCG00000005437	ENSSSCG00000012026	0.866725
ENSSSCG00000005437	ENSSSCG00000014156	0.770381
ENSSSCG00000005437	ENSSSCG00000014168	0.852902
ENSSSCG00000005437	ENSSSCG00000015037	0.832701
ENSSSCG00000005437	ENSSSCG00000015519	0.823159
ENSSSCG00000005437	ENSSSCG00000015814	0.768516
ENSSSCG00000005437	ENSSSCG00000016824	0.838285
ENSSSCG00000005437	ENSSSCG00000016898	0.771743
ENSSSCG00000005437	ENSSSCG00000017607	0.76732
ENSSSCG00000005437	ENSSSCG00000022925	0.79343
ENSSSCG00000005437	ENSSSCG00000023105	0.764717
ENSSSCG00000005437	ENSSSCG00000023133	0.761423
ENSSSCG00000005437	ENSSSCG00000025698	0.817057
ENSSSCG00000005437	ENSSSCG00000028056	0.778791
ENSSSCG00000005437	ENSSSCG00000031262	0.777503
ENSSSCG00000005437	ENSSSCG00000031744	0.839433
ENSSSCG00000005437	ENSSSCG00000032320	0.863951
ENSSSCG00000005437	ENSSSCG00000033175	0.734363
ENSSSCG00000005437	ENSSSCG00000035037	0.785976
ENSSSCG00000005437	ENSSSCG00000036787	0.787335
ENSSSCG00000005437	ENSSSCG00000037201	0.712581
ENSSSCG00000005437	ENSSSCG00000038132	0.82276
ENSSSCG00000005437	ENSSSCG00000038149	0.826626
ENSSSCG00000005437	ENSSSCG00000038500	0.724046
ENSSSCG00000005437	ENSSSCG00000038727	0.717817
ENSSSCG00000005437	ENSSSCG00000040366	0.707699
ENSSSCG00000005437	ENSSSCG00000040728	0.768541
ENSSSCG00000005437	ENSSSCG00000005965	0.738919
ENSSSCG00000005437	ENSSSCG00000006018	0.764183
ENSSSCG00000005437	ENSSSCG00000006331	0.703492
ENSSSCG00000005437	ENSSSCG00000007484	0.732721
ENSSSCG00000005437	ENSSSCG00000008334	0.800144
ENSSSCG00000005437	ENSSSCG00000009865	0.895347
ENSSSCG00000005437	ENSSSCG00000010219	0.819578
ENSSSCG00000005437	ENSSSCG00000010224	0.884601
ENSSSCG00000005437	ENSSSCG00000011125	0.900284
ENSSSCG00000005437	ENSSSCG00000011264	0.716232
ENSSSCG00000005437	ENSSSCG00000011951	0.768486
ENSSSCG00000005437	ENSSSCG00000015235	0.772661
ENSSSCG00000005437	ENSSSCG00000015595	0.742967
ENSSSCG00000005437	ENSSSCG00000015871	0.842928
ENSSSCG00000005437	ENSSSCG00000017546	0.717819
ENSSSCG00000005437	ENSSSCG00000021646	0.757768
ENSSSCG00000005437	ENSSSCG00000024152	0.80728
ENSSSCG00000005437	ENSSSCG00000026533	0.704712
ENSSSCG00000005437	ENSSSCG00000029998	0.85432
ENSSSCG00000005437	ENSSSCG00000032527	0.745575
ENSSSCG00000005437	ENSSSCG00000035212	0.754733
ENSSSCG00000005437	ENSSSCG00000037762	-0.703148
ENSSSCG00000005437	ENSSSCG00000037766	0.792832
ENSSSCG00000005437	ENSSSCG00000038911	0.729554
ENSSSCG00000005636	ENSSSCG00000010464	0.759234
ENSSSCG00000005636	ENSSSCG00000010626	0.842227
ENSSSCG00000005636	ENSSSCG00000011075	0.753961
ENSSSCG00000005636	ENSSSCG00000017986	0.811586
ENSSSCG00000005636	ENSSSCG00000023105	0.736803
ENSSSCG00000005636	ENSSSCG00000029226	0.826699
ENSSSCG00000005636	ENSSSCG00000029507	0.803457
ENSSSCG00000005636	ENSSSCG00000029571	0.706338
ENSSSCG00000005636	ENSSSCG00000037201	0.772497
ENSSSCG00000005636	ENSSSCG00000038374	0.775486
ENSSSCG00000005636	ENSSSCG00000038594	0.710609
ENSSSCG00000005636	ENSSSCG00000005385	0.850077
ENSSSCG00000005636	ENSSSCG00000006725	0.704593
ENSSSCG00000005636	ENSSSCG00000009370	0.80728
ENSSSCG00000005636	ENSSSCG00000009974	0.717119
ENSSSCG00000005636	ENSSSCG00000010994	0.823935
ENSSSCG00000005636	ENSSSCG00000011125	0.737756
ENSSSCG00000005636	ENSSSCG00000011264	0.796898
ENSSSCG00000005636	ENSSSCG00000023660	0.70856
ENSSSCG00000005636	ENSSSCG00000032527	0.727122
ENSSSCG00000005636	ENSSSCG00000034207	0.740899
ENSSSCG00000005636	ENSSSCG00000036136	0.764435
ENSSSCG00000005636	ENSSSCG00000036742	0.740548
ENSSSCG00000005636	ENSSSCG00000040751	0.90893
ENSSSCG00000005648	ENSSSCG00000005669	0.836617
ENSSSCG00000005648	ENSSSCG00000005672	0.734034
ENSSSCG00000005648	ENSSSCG00000006970	-0.745125
ENSSSCG00000005648	ENSSSCG00000007993	0.786895
ENSSSCG00000005648	ENSSSCG00000009152	-0.712309
ENSSSCG00000005648	ENSSSCG00000010517	0.789686
ENSSSCG00000005648	ENSSSCG00000013178	0.838665
ENSSSCG00000005648	ENSSSCG00000014156	-0.763728
ENSSSCG00000005648	ENSSSCG00000014168	-0.815063
ENSSSCG00000005648	ENSSSCG00000017414	0.87394
ENSSSCG00000005648	ENSSSCG00000017528	0.879439
ENSSSCG00000005648	ENSSSCG00000017727	0.748751
ENSSSCG00000005648	ENSSSCG00000017885	0.829291
ENSSSCG00000005648	ENSSSCG00000021436	0.740015
ENSSSCG00000005648	ENSSSCG00000032320	-0.761909
ENSSSCG00000005648	ENSSSCG00000034494	0.759674
ENSSSCG00000005648	ENSSSCG00000000258	0.767088
ENSSSCG00000005648	ENSSSCG00000000702	0.717188
ENSSSCG00000005648	ENSSSCG00000000736	0.775419
ENSSSCG00000005648	ENSSSCG00000001474	0.789597
ENSSSCG00000005648	ENSSSCG00000001539	0.70873
ENSSSCG00000005648	ENSSSCG00000001619	0.785509
ENSSSCG00000005648	ENSSSCG00000001661	0.735612
ENSSSCG00000005648	ENSSSCG00000002388	0.751094
ENSSSCG00000005648	ENSSSCG00000002769	0.830936
ENSSSCG00000005648	ENSSSCG00000002885	0.770843
ENSSSCG00000005648	ENSSSCG00000003030	0.728477
ENSSSCG00000005648	ENSSSCG00000003211	0.778419
ENSSSCG00000005648	ENSSSCG00000004576	-0.725253
ENSSSCG00000005648	ENSSSCG00000004739	-0.741984
ENSSSCG00000005648	ENSSSCG00000004938	-0.700895
ENSSSCG00000005648	ENSSSCG00000005318	0.806185
ENSSSCG00000005648	ENSSSCG00000005917	0.802845
ENSSSCG00000005648	ENSSSCG00000006018	-0.740804
ENSSSCG00000005648	ENSSSCG00000006468	0.807051
ENSSSCG00000005648	ENSSSCG00000007559	0.825442
ENSSSCG00000005648	ENSSSCG00000007767	0.789293
ENSSSCG00000005648	ENSSSCG00000008553	0.762858
ENSSSCG00000005648	ENSSSCG00000011025	-0.71916
ENSSSCG00000005648	ENSSSCG00000011951	-0.752779
ENSSSCG00000005648	ENSSSCG00000012029	-0.837778
ENSSSCG00000005648	ENSSSCG00000012287	0.845307
ENSSSCG00000005648	ENSSSCG00000012850	0.750324
ENSSSCG00000005648	ENSSSCG00000012981	0.745793
ENSSSCG00000005648	ENSSSCG00000013028	0.846603
ENSSSCG00000005648	ENSSSCG00000013241	0.825141
ENSSSCG00000005648	ENSSSCG00000013501	0.727861
ENSSSCG00000005648	ENSSSCG00000013873	0.765186
ENSSSCG00000005648	ENSSSCG00000014319	-0.702936
ENSSSCG00000005648	ENSSSCG00000015211	0.721584
ENSSSCG00000005648	ENSSSCG00000015235	-0.733345
ENSSSCG00000005648	ENSSSCG00000015393	-0.760885
ENSSSCG00000005648	ENSSSCG00000015982	0.808436
ENSSSCG00000005648	ENSSSCG00000015987	-0.712685
ENSSSCG00000005648	ENSSSCG00000017397	0.71795
ENSSSCG00000005648	ENSSSCG00000017475	0.868452
ENSSSCG00000005648	ENSSSCG00000017516	0.77411
ENSSSCG00000005648	ENSSSCG00000017604	-0.708807
ENSSSCG00000005648	ENSSSCG00000017950	0.835598
ENSSSCG00000005648	ENSSSCG00000021646	-0.789244
ENSSSCG00000005648	ENSSSCG00000022343	0.705654
ENSSSCG00000005648	ENSSSCG00000022728	0.714713
ENSSSCG00000005648	ENSSSCG00000024672	0.788456
ENSSSCG00000005648	ENSSSCG00000025321	0.854114
ENSSSCG00000005648	ENSSSCG00000026103	0.749267
ENSSSCG00000005648	ENSSSCG00000026894	-0.709528
ENSSSCG00000005648	ENSSSCG00000027017	-0.807187
ENSSSCG00000005648	ENSSSCG00000028190	0.702919
ENSSSCG00000005648	ENSSSCG00000028606	0.740773
ENSSSCG00000005648	ENSSSCG00000029998	-0.848065
ENSSSCG00000005648	ENSSSCG00000030947	0.740729
ENSSSCG00000005648	ENSSSCG00000031562	0.748538
ENSSSCG00000005648	ENSSSCG00000032080	-0.708958
ENSSSCG00000005648	ENSSSCG00000032242	0.795853
ENSSSCG00000005648	ENSSSCG00000032372	-0.806112
ENSSSCG00000005648	ENSSSCG00000034191	-0.748285
ENSSSCG00000005648	ENSSSCG00000034395	-0.742049
ENSSSCG00000005648	ENSSSCG00000034654	0.756683
ENSSSCG00000005648	ENSSSCG00000035212	-0.712189
ENSSSCG00000005648	ENSSSCG00000035253	0.70852
ENSSSCG00000005648	ENSSSCG00000035952	0.822072
ENSSSCG00000005648	ENSSSCG00000036308	0.74056
ENSSSCG00000005648	ENSSSCG00000036933	0.848243
ENSSSCG00000005648	ENSSSCG00000037762	0.851812
ENSSSCG00000005648	ENSSSCG00000038076	-0.725785
ENSSSCG00000005648	ENSSSCG00000038220	0.764643
ENSSSCG00000005648	ENSSSCG00000038253	-0.739961
ENSSSCG00000005648	ENSSSCG00000040107	0.766421
ENSSSCG00000005648	ENSSSCG00000040959	-0.74333
ENSSSCG00000005669	ENSSSCG00000005672	0.755885
ENSSSCG00000005669	ENSSSCG00000006698	0.762759
ENSSSCG00000005669	ENSSSCG00000007993	0.774261
ENSSSCG00000005669	ENSSSCG00000008349	0.727206
ENSSSCG00000005669	ENSSSCG00000009152	-0.752647
ENSSSCG00000005669	ENSSSCG00000013178	0.790775
ENSSSCG00000005669	ENSSSCG00000014168	-0.773068
ENSSSCG00000005669	ENSSSCG00000015283	0.70209
ENSSSCG00000005669	ENSSSCG00000017414	0.766955
ENSSSCG00000005669	ENSSSCG00000017528	0.809383
ENSSSCG00000005669	ENSSSCG00000017727	0.819119
ENSSSCG00000005669	ENSSSCG00000017885	0.838261
ENSSSCG00000005669	ENSSSCG00000021436	0.757855
ENSSSCG00000005669	ENSSSCG00000024428	0.769146
ENSSSCG00000005669	ENSSSCG00000034494	0.792142
ENSSSCG00000005669	ENSSSCG00000000702	0.701714
ENSSSCG00000005669	ENSSSCG00000000937	-0.727367
ENSSSCG00000005669	ENSSSCG00000001474	0.734651
ENSSSCG00000005669	ENSSSCG00000001539	0.708995
ENSSSCG00000005669	ENSSSCG00000001619	0.723146
ENSSSCG00000005669	ENSSSCG00000002388	0.700285
ENSSSCG00000005669	ENSSSCG00000002769	0.801384
ENSSSCG00000005669	ENSSSCG00000006018	-0.713435
ENSSSCG00000005669	ENSSSCG00000007559	0.759922
ENSSSCG00000005669	ENSSSCG00000007767	0.715099
ENSSSCG00000005669	ENSSSCG00000008334	-0.704556
ENSSSCG00000005669	ENSSSCG00000008388	-0.70548
ENSSSCG00000005669	ENSSSCG00000011951	-0.718354
ENSSSCG00000005669	ENSSSCG00000012981	0.741439
ENSSSCG00000005669	ENSSSCG00000013028	0.813627
ENSSSCG00000005669	ENSSSCG00000013501	0.701156
ENSSSCG00000005669	ENSSSCG00000015982	0.722039
ENSSSCG00000005669	ENSSSCG00000016701	0.773895
ENSSSCG00000005669	ENSSSCG00000017475	0.791636
ENSSSCG00000005669	ENSSSCG00000017516	0.762313
ENSSSCG00000005669	ENSSSCG00000026103	0.773416
ENSSSCG00000005669	ENSSSCG00000028190	0.790032
ENSSSCG00000005669	ENSSSCG00000029998	-0.78623
ENSSSCG00000005669	ENSSSCG00000034654	0.715474
ENSSSCG00000005669	ENSSSCG00000036340	0.754058
ENSSSCG00000005669	ENSSSCG00000036933	0.803796
ENSSSCG00000005669	ENSSSCG00000037762	0.829001
ENSSSCG00000005672	ENSSSCG00000007993	0.731226
ENSSSCG00000005672	ENSSSCG00000017885	0.731896
ENSSSCG00000005672	ENSSSCG00000022322	-0.729746
ENSSSCG00000005672	ENSSSCG00000038149	-0.735739
ENSSSCG00000005672	ENSSSCG00000007559	0.739212
ENSSSCG00000005672	ENSSSCG00000008334	-0.773791
ENSSSCG00000005672	ENSSSCG00000013028	0.744641
ENSSSCG00000005672	ENSSSCG00000032080	-0.723308
ENSSSCG00000006023	ENSSSCG00000006231	0.772881
ENSSSCG00000006023	ENSSSCG00000006970	0.792248
ENSSSCG00000006023	ENSSSCG00000009152	0.75787
ENSSSCG00000006023	ENSSSCG00000011075	0.723126
ENSSSCG00000006023	ENSSSCG00000011451	0.744256
ENSSSCG00000006023	ENSSSCG00000011496	0.751318
ENSSSCG00000006023	ENSSSCG00000012110	0.729795
ENSSSCG00000006023	ENSSSCG00000014168	0.721837
ENSSSCG00000006023	ENSSSCG00000015037	0.718995
ENSSSCG00000006023	ENSSSCG00000015519	0.820255
ENSSSCG00000006023	ENSSSCG00000015814	0.757996
ENSSSCG00000006023	ENSSSCG00000016898	0.822398
ENSSSCG00000006023	ENSSSCG00000017607	0.788919
ENSSSCG00000006023	ENSSSCG00000023105	0.774762
ENSSSCG00000006023	ENSSSCG00000023133	0.776069
ENSSSCG00000006023	ENSSSCG00000023806	0.760611
ENSSSCG00000006023	ENSSSCG00000031744	0.766209
ENSSSCG00000006023	ENSSSCG00000032320	0.777688
ENSSSCG00000006023	ENSSSCG00000035037	0.736993
ENSSSCG00000006023	ENSSSCG00000036555	0.765134
ENSSSCG00000006023	ENSSSCG00000036787	0.72357
ENSSSCG00000006023	ENSSSCG00000037201	0.768852
ENSSSCG00000006023	ENSSSCG00000038132	0.830704
ENSSSCG00000006023	ENSSSCG00000038149	0.800494
ENSSSCG00000006023	ENSSSCG00000038500	0.819871
ENSSSCG00000006023	ENSSSCG00000038594	0.743681
ENSSSCG00000006023	ENSSSCG00000002838	0.701575
ENSSSCG00000006023	ENSSSCG00000007484	0.78782
ENSSSCG00000006023	ENSSSCG00000009865	0.825851
ENSSSCG00000006023	ENSSSCG00000010224	0.714991
ENSSSCG00000006023	ENSSSCG00000011125	0.71383
ENSSSCG00000006023	ENSSSCG00000017376	0.728943
ENSSSCG00000006023	ENSSSCG00000029998	0.715455
ENSSSCG00000006023	ENSSSCG00000030095	0.731369
ENSSSCG00000006231	ENSSSCG00000006970	0.890181
ENSSSCG00000006231	ENSSSCG00000008374	0.762936
ENSSSCG00000006231	ENSSSCG00000010455	0.80093
ENSSSCG00000006231	ENSSSCG00000011075	0.730851
ENSSSCG00000006231	ENSSSCG00000011496	0.840599
ENSSSCG00000006231	ENSSSCG00000012026	0.777289
ENSSSCG00000006231	ENSSSCG00000014156	0.81681
ENSSSCG00000006231	ENSSSCG00000014168	0.80658
ENSSSCG00000006231	ENSSSCG00000014251	0.866606
ENSSSCG00000006231	ENSSSCG00000015519	0.756724
ENSSSCG00000006231	ENSSSCG00000015814	0.821637
ENSSSCG00000006231	ENSSSCG00000016824	0.846685
ENSSSCG00000006231	ENSSSCG00000016898	0.864228
ENSSSCG00000006231	ENSSSCG00000021273	0.797567
ENSSSCG00000006231	ENSSSCG00000022925	0.732548
ENSSSCG00000006231	ENSSSCG00000023105	0.792716
ENSSSCG00000006231	ENSSSCG00000023133	0.739567
ENSSSCG00000006231	ENSSSCG00000023806	0.815317
ENSSSCG00000006231	ENSSSCG00000024416	0.719645
ENSSSCG00000006231	ENSSSCG00000031262	0.760087
ENSSSCG00000006231	ENSSSCG00000031744	0.870378
ENSSSCG00000006231	ENSSSCG00000032320	0.83718
ENSSSCG00000006231	ENSSSCG00000033175	0.831281
ENSSSCG00000006231	ENSSSCG00000036555	0.734639
ENSSSCG00000006231	ENSSSCG00000036787	0.727875
ENSSSCG00000006231	ENSSSCG00000038132	0.798795
ENSSSCG00000006231	ENSSSCG00000038149	0.79555
ENSSSCG00000006231	ENSSSCG00000038500	0.725835
ENSSSCG00000006231	ENSSSCG00000040728	0.854659
ENSSSCG00000006231	ENSSSCG00000001049	0.811145
ENSSSCG00000006231	ENSSSCG00000001061	0.71742
ENSSSCG00000006231	ENSSSCG00000004127	0.726357
ENSSSCG00000006231	ENSSSCG00000004138	0.814472
ENSSSCG00000006231	ENSSSCG00000004387	0.810037
ENSSSCG00000006231	ENSSSCG00000004739	0.724548
ENSSSCG00000006231	ENSSSCG00000006018	0.841494
ENSSSCG00000006231	ENSSSCG00000006331	0.841479
ENSSSCG00000006231	ENSSSCG00000007311	0.70248
ENSSSCG00000006231	ENSSSCG00000007484	0.805523
ENSSSCG00000006231	ENSSSCG00000008334	0.72827
ENSSSCG00000006231	ENSSSCG00000009865	0.841498
ENSSSCG00000006231	ENSSSCG00000010224	0.786741
ENSSSCG00000006231	ENSSSCG00000011125	0.751281
ENSSSCG00000006231	ENSSSCG00000011594	0.799729
ENSSSCG00000006231	ENSSSCG00000011951	0.71881
ENSSSCG00000006231	ENSSSCG00000015235	0.799205
ENSSSCG00000006231	ENSSSCG00000015871	0.75151
ENSSSCG00000006231	ENSSSCG00000016703	0.700609
ENSSSCG00000006231	ENSSSCG00000021646	0.814183
ENSSSCG00000006231	ENSSSCG00000022318	0.736991
ENSSSCG00000006231	ENSSSCG00000022760	0.717461
ENSSSCG00000006231	ENSSSCG00000024253	0.707599
ENSSSCG00000006231	ENSSSCG00000024970	0.787797
ENSSSCG00000006231	ENSSSCG00000027480	0.737182
ENSSSCG00000006231	ENSSSCG00000029998	0.775794
ENSSSCG00000006231	ENSSSCG00000030095	0.769042
ENSSSCG00000006231	ENSSSCG00000032080	0.757099
ENSSSCG00000006231	ENSSSCG00000035212	0.721673
ENSSSCG00000006231	ENSSSCG00000037647	0.733935
ENSSSCG00000006231	ENSSSCG00000037766	0.7944
ENSSSCG00000006231	ENSSSCG00000038872	0.719479
ENSSSCG00000006231	ENSSSCG00000039161	0.785449
ENSSSCG00000006277	ENSSSCG00000006940	0.735426
ENSSSCG00000006277	ENSSSCG00000010626	0.725498
ENSSSCG00000006277	ENSSSCG00000011075	0.775047
ENSSSCG00000006277	ENSSSCG00000011076	0.733826
ENSSSCG00000006277	ENSSSCG00000011496	0.707286
ENSSSCG00000006277	ENSSSCG00000014156	0.759038
ENSSSCG00000006277	ENSSSCG00000015037	0.717235
ENSSSCG00000006277	ENSSSCG00000015519	0.778602
ENSSSCG00000006277	ENSSSCG00000015814	0.710328
ENSSSCG00000006277	ENSSSCG00000016824	0.774268
ENSSSCG00000006277	ENSSSCG00000017983	0.724537
ENSSSCG00000006277	ENSSSCG00000017986	0.822521
ENSSSCG00000006277	ENSSSCG00000022256	0.765284
ENSSSCG00000006277	ENSSSCG00000022322	0.700357
ENSSSCG00000006277	ENSSSCG00000023031	0.792384
ENSSSCG00000006277	ENSSSCG00000023105	0.786335
ENSSSCG00000006277	ENSSSCG00000025698	0.826208
ENSSSCG00000006277	ENSSSCG00000029507	0.700973
ENSSSCG00000006277	ENSSSCG00000031154	0.708621
ENSSSCG00000006277	ENSSSCG00000031262	0.777879
ENSSSCG00000006277	ENSSSCG00000032320	0.755125
ENSSSCG00000006277	ENSSSCG00000035037	0.761056
ENSSSCG00000006277	ENSSSCG00000036787	0.77636
ENSSSCG00000006277	ENSSSCG00000037201	0.747338
ENSSSCG00000006277	ENSSSCG00000038149	0.753576
ENSSSCG00000006277	ENSSSCG00000038500	0.75369
ENSSSCG00000006277	ENSSSCG00000038594	0.791182
ENSSSCG00000006277	ENSSSCG00000039419	0.746831
ENSSSCG00000006277	ENSSSCG00000005965	0.728683
ENSSSCG00000006277	ENSSSCG00000007484	0.716658
ENSSSCG00000006277	ENSSSCG00000009370	0.747667
ENSSSCG00000006277	ENSSSCG00000009865	0.723407
ENSSSCG00000006277	ENSSSCG00000010219	0.762856
ENSSSCG00000006277	ENSSSCG00000010224	0.765959
ENSSSCG00000006277	ENSSSCG00000011125	0.761553
ENSSSCG00000006277	ENSSSCG00000017403	0.712206
ENSSSCG00000006277	ENSSSCG00000026533	0.843845
ENSSSCG00000006277	ENSSSCG00000032367	0.834733
ENSSSCG00000006277	ENSSSCG00000032381	0.710637
ENSSSCG00000006277	ENSSSCG00000032527	0.888281
ENSSSCG00000006277	ENSSSCG00000034207	0.755904
ENSSSCG00000006277	ENSSSCG00000035537	0.765571
ENSSSCG00000006277	ENSSSCG00000038948	0.764437
ENSSSCG00000006290	ENSSSCG00000006698	-0.755296
ENSSSCG00000006290	ENSSSCG00000006970	0.721765
ENSSSCG00000006290	ENSSSCG00000009152	0.716526
ENSSSCG00000006290	ENSSSCG00000011075	0.833602
ENSSSCG00000006290	ENSSSCG00000011496	0.711038
ENSSSCG00000006290	ENSSSCG00000012026	0.736119
ENSSSCG00000006290	ENSSSCG00000014156	0.703094
ENSSSCG00000006290	ENSSSCG00000014168	0.773423
ENSSSCG00000006290	ENSSSCG00000015037	0.854245
ENSSSCG00000006290	ENSSSCG00000015519	0.740925
ENSSSCG00000006290	ENSSSCG00000016824	0.713787
ENSSSCG00000006290	ENSSSCG00000017607	0.721653
ENSSSCG00000006290	ENSSSCG00000017986	0.774433
ENSSSCG00000006290	ENSSSCG00000023105	0.770739
ENSSSCG00000006290	ENSSSCG00000025698	0.815307
ENSSSCG00000006290	ENSSSCG00000029571	0.725119
ENSSSCG00000006290	ENSSSCG00000032320	0.787852
ENSSSCG00000006290	ENSSSCG00000035037	0.738611
ENSSSCG00000006290	ENSSSCG00000037201	0.852217
ENSSSCG00000006290	ENSSSCG00000038132	0.767522
ENSSSCG00000006290	ENSSSCG00000038594	0.728755
ENSSSCG00000006290	ENSSSCG00000005385	0.763784
ENSSSCG00000006290	ENSSSCG00000009865	0.796807
ENSSSCG00000006290	ENSSSCG00000010219	0.727682
ENSSSCG00000006290	ENSSSCG00000010224	0.741802
ENSSSCG00000006290	ENSSSCG00000011125	0.792721
ENSSSCG00000006290	ENSSSCG00000011264	0.735094
ENSSSCG00000006290	ENSSSCG00000015595	0.795008
ENSSSCG00000006290	ENSSSCG00000026533	0.711234
ENSSSCG00000006290	ENSSSCG00000029998	0.791848
ENSSSCG00000006290	ENSSSCG00000030165	0.722455
ENSSSCG00000006290	ENSSSCG00000032527	0.729397
ENSSSCG00000006290	ENSSSCG00000035537	0.796079
ENSSSCG00000006290	ENSSSCG00000036742	0.725443
ENSSSCG00000006359	ENSSSCG00000012026	0.769824
ENSSSCG00000006359	ENSSSCG00000015037	0.731911
ENSSSCG00000006359	ENSSSCG00000015519	0.776752
ENSSSCG00000006359	ENSSSCG00000015550	0.776239
ENSSSCG00000006359	ENSSSCG00000022925	0.861764
ENSSSCG00000006359	ENSSSCG00000023133	0.723057
ENSSSCG00000006359	ENSSSCG00000025698	0.789586
ENSSSCG00000006359	ENSSSCG00000036787	0.759389
ENSSSCG00000006359	ENSSSCG00000038149	0.766574
ENSSSCG00000006359	ENSSSCG00000006625	0.715704
ENSSSCG00000006359	ENSSSCG00000008443	0.713515
ENSSSCG00000006359	ENSSSCG00000010224	0.767754
ENSSSCG00000006359	ENSSSCG00000016573	0.709135
ENSSSCG00000006359	ENSSSCG00000024152	0.702654
ENSSSCG00000006698	ENSSSCG00000008349	0.81977
ENSSSCG00000006698	ENSSSCG00000013178	0.741217
ENSSSCG00000006698	ENSSSCG00000014168	-0.752077
ENSSSCG00000006698	ENSSSCG00000015283	0.798229
ENSSSCG00000006698	ENSSSCG00000017414	0.782352
ENSSSCG00000006698	ENSSSCG00000017528	0.792094
ENSSSCG00000006698	ENSSSCG00000017727	0.715594
ENSSSCG00000006698	ENSSSCG00000021436	0.795535
ENSSSCG00000006698	ENSSSCG00000021638	0.864248
ENSSSCG00000006698	ENSSSCG00000034494	0.826575
ENSSSCG00000006698	ENSSSCG00000036030	0.72171
ENSSSCG00000006698	ENSSSCG00000009676	0.741411
ENSSSCG00000006698	ENSSSCG00000013397	0.735535
ENSSSCG00000006698	ENSSSCG00000017516	0.711056
ENSSSCG00000006698	ENSSSCG00000029998	-0.737897
ENSSSCG00000006698	ENSSSCG00000032367	-0.757608
ENSSSCG00000006698	ENSSSCG00000034654	0.741397
ENSSSCG00000006698	ENSSSCG00000034708	0.82536
ENSSSCG00000006698	ENSSSCG00000036340	0.784654
ENSSSCG00000006698	ENSSSCG00000036933	0.755424
ENSSSCG00000006940	ENSSSCG00000015541	0.776552
ENSSSCG00000006940	ENSSSCG00000022925	0.707279
ENSSSCG00000006940	ENSSSCG00000025698	0.705107
ENSSSCG00000006940	ENSSSCG00000028056	0.752059
ENSSSCG00000006940	ENSSSCG00000000396	0.706794
ENSSSCG00000006940	ENSSSCG00000002383	0.886842
ENSSSCG00000006940	ENSSSCG00000010224	0.73088
ENSSSCG00000006940	ENSSSCG00000014336	0.866008
ENSSSCG00000006940	ENSSSCG00000031616	0.734036
ENSSSCG00000006970	ENSSSCG00000008374	0.778471
ENSSSCG00000006970	ENSSSCG00000009152	0.771362
ENSSSCG00000006970	ENSSSCG00000010455	0.84337
ENSSSCG00000006970	ENSSSCG00000011075	0.713931
ENSSSCG00000006970	ENSSSCG00000011451	0.721459
ENSSSCG00000006970	ENSSSCG00000011496	0.920127
ENSSSCG00000006970	ENSSSCG00000012026	0.848919
ENSSSCG00000006970	ENSSSCG00000012110	0.726846
ENSSSCG00000006970	ENSSSCG00000014156	0.813078
ENSSSCG00000006970	ENSSSCG00000014168	0.899114
ENSSSCG00000006970	ENSSSCG00000014251	0.737995
ENSSSCG00000006970	ENSSSCG00000015037	0.756579
ENSSSCG00000006970	ENSSSCG00000015519	0.824804
ENSSSCG00000006970	ENSSSCG00000015814	0.879306
ENSSSCG00000006970	ENSSSCG00000016824	0.895778
ENSSSCG00000006970	ENSSSCG00000016898	0.870326
ENSSSCG00000006970	ENSSSCG00000017607	0.788342
ENSSSCG00000006970	ENSSSCG00000021273	0.798248
ENSSSCG00000006970	ENSSSCG00000022925	0.721419
ENSSSCG00000006970	ENSSSCG00000023105	0.761067
ENSSSCG00000006970	ENSSSCG00000023133	0.708928
ENSSSCG00000006970	ENSSSCG00000023806	0.714772
ENSSSCG00000006970	ENSSSCG00000025698	0.717505
ENSSSCG00000006970	ENSSSCG00000031262	0.714499
ENSSSCG00000006970	ENSSSCG00000031744	0.866924
ENSSSCG00000006970	ENSSSCG00000032320	0.887396
ENSSSCG00000006970	ENSSSCG00000033175	0.898797
ENSSSCG00000006970	ENSSSCG00000036555	0.740331
ENSSSCG00000006970	ENSSSCG00000036787	0.787311
ENSSSCG00000006970	ENSSSCG00000038132	0.816289
ENSSSCG00000006970	ENSSSCG00000038149	0.78621
ENSSSCG00000006970	ENSSSCG00000040728	0.843911
ENSSSCG00000006970	ENSSSCG00000001049	0.752277
ENSSSCG00000006970	ENSSSCG00000001061	0.74677
ENSSSCG00000006970	ENSSSCG00000001611	0.723596
ENSSSCG00000006970	ENSSSCG00000004127	0.79171
ENSSSCG00000006970	ENSSSCG00000004138	0.746003
ENSSSCG00000006970	ENSSSCG00000004387	0.761759
ENSSSCG00000006970	ENSSSCG00000004505	0.731736
ENSSSCG00000006970	ENSSSCG00000004600	0.767235
ENSSSCG00000006970	ENSSSCG00000004739	0.84045
ENSSSCG00000006970	ENSSSCG00000005096	0.781775
ENSSSCG00000006970	ENSSSCG00000006018	0.831814
ENSSSCG00000006970	ENSSSCG00000006331	0.744746
ENSSSCG00000006970	ENSSSCG00000006346	0.781798
ENSSSCG00000006970	ENSSSCG00000007311	0.737044
ENSSSCG00000006970	ENSSSCG00000007484	0.910815
ENSSSCG00000006970	ENSSSCG00000007767	-0.747177
ENSSSCG00000006970	ENSSSCG00000008334	0.720841
ENSSSCG00000006970	ENSSSCG00000009440	0.750539
ENSSSCG00000006970	ENSSSCG00000009655	0.709258
ENSSSCG00000006970	ENSSSCG00000009682	0.716653
ENSSSCG00000006970	ENSSSCG00000009865	0.87674
ENSSSCG00000006970	ENSSSCG00000010219	0.701967
ENSSSCG00000006970	ENSSSCG00000010224	0.766644
ENSSSCG00000006970	ENSSSCG00000011125	0.728676
ENSSSCG00000006970	ENSSSCG00000011594	0.786068
ENSSSCG00000006970	ENSSSCG00000011810	0.724024
ENSSSCG00000006970	ENSSSCG00000011951	0.789258
ENSSSCG00000006970	ENSSSCG00000012029	0.750526
ENSSSCG00000006970	ENSSSCG00000012620	0.731182
ENSSSCG00000006970	ENSSSCG00000013501	-0.746888
ENSSSCG00000006970	ENSSSCG00000015235	0.877366
ENSSSCG00000006970	ENSSSCG00000015237	0.758769
ENSSSCG00000006970	ENSSSCG00000015357	0.814283
ENSSSCG00000006970	ENSSSCG00000015871	0.702786
ENSSSCG00000006970	ENSSSCG00000015982	-0.753215
ENSSSCG00000006970	ENSSSCG00000016703	0.756273
ENSSSCG00000006970	ENSSSCG00000021646	0.874652
ENSSSCG00000006970	ENSSSCG00000022760	0.711894
ENSSSCG00000006970	ENSSSCG00000023357	0.734321
ENSSSCG00000006970	ENSSSCG00000024970	0.824772
ENSSSCG00000006970	ENSSSCG00000025182	0.789225
ENSSSCG00000006970	ENSSSCG00000025777	0.726838
ENSSSCG00000006970	ENSSSCG00000027017	0.744434
ENSSSCG00000006970	ENSSSCG00000029998	0.875752
ENSSSCG00000006970	ENSSSCG00000032080	0.776343
ENSSSCG00000006970	ENSSSCG00000032372	0.724564
ENSSSCG00000006970	ENSSSCG00000034654	-0.702932
ENSSSCG00000006970	ENSSSCG00000035212	0.723157
ENSSSCG00000006970	ENSSSCG00000036546	0.752167
ENSSSCG00000006970	ENSSSCG00000037762	-0.749622
ENSSSCG00000006970	ENSSSCG00000037766	0.748022
ENSSSCG00000006970	ENSSSCG00000038313	-0.723807
ENSSSCG00000006970	ENSSSCG00000039568	0.71128
ENSSSCG00000007993	ENSSSCG00000014156	-0.721512
ENSSSCG00000007993	ENSSSCG00000014168	-0.745995
ENSSSCG00000007993	ENSSSCG00000015283	0.716615
ENSSSCG00000007993	ENSSSCG00000017414	0.864398
ENSSSCG00000007993	ENSSSCG00000017528	0.782987
ENSSSCG00000007993	ENSSSCG00000017727	0.785572
ENSSSCG00000007993	ENSSSCG00000017885	0.843004
ENSSSCG00000007993	ENSSSCG00000036030	0.790209
ENSSSCG00000007993	ENSSSCG00000001619	0.817317
ENSSSCG00000007993	ENSSSCG00000002769	0.721594
ENSSSCG00000007993	ENSSSCG00000007559	0.868993
ENSSSCG00000007993	ENSSSCG00000007767	0.806056
ENSSSCG00000007993	ENSSSCG00000010219	-0.731163
ENSSSCG00000007993	ENSSSCG00000012029	-0.722269
ENSSSCG00000007993	ENSSSCG00000013028	0.700711
ENSSSCG00000007993	ENSSSCG00000015982	0.707086
ENSSSCG00000007993	ENSSSCG00000017475	0.822423
ENSSSCG00000007993	ENSSSCG00000020801	0.722659
ENSSSCG00000007993	ENSSSCG00000026103	0.798846
ENSSSCG00000007993	ENSSSCG00000031562	0.71781
ENSSSCG00000007993	ENSSSCG00000034191	-0.718739
ENSSSCG00000007993	ENSSSCG00000035253	0.761537
ENSSSCG00000007993	ENSSSCG00000037762	0.819909
ENSSSCG00000007993	ENSSSCG00000037970	0.725331
ENSSSCG00000007993	ENSSSCG00000040107	0.811435
ENSSSCG00000008349	ENSSSCG00000009801	0.708967
ENSSSCG00000008349	ENSSSCG00000015283	0.785175
ENSSSCG00000008349	ENSSSCG00000017414	0.719231
ENSSSCG00000008349	ENSSSCG00000017528	0.734265
ENSSSCG00000008349	ENSSSCG00000017727	0.749316
ENSSSCG00000008349	ENSSSCG00000017885	0.722538
ENSSSCG00000008349	ENSSSCG00000021359	0.735068
ENSSSCG00000008349	ENSSSCG00000021638	0.865425
ENSSSCG00000008349	ENSSSCG00000023714	0.700451
ENSSSCG00000008349	ENSSSCG00000036030	0.793417
ENSSSCG00000008349	ENSSSCG00000010219	-0.707678
ENSSSCG00000008349	ENSSSCG00000013397	0.703796
ENSSSCG00000008349	ENSSSCG00000032367	-0.728921
ENSSSCG00000008349	ENSSSCG00000034654	0.760191
ENSSSCG00000008349	ENSSSCG00000034708	0.800697
ENSSSCG00000008349	ENSSSCG00000036340	0.718023
ENSSSCG00000008374	ENSSSCG00000010455	0.899153
ENSSSCG00000008374	ENSSSCG00000011496	0.856718
ENSSSCG00000008374	ENSSSCG00000012026	0.842764
ENSSSCG00000008374	ENSSSCG00000014156	0.86031
ENSSSCG00000008374	ENSSSCG00000014168	0.783609
ENSSSCG00000008374	ENSSSCG00000015814	0.845249
ENSSSCG00000008374	ENSSSCG00000016824	0.897354
ENSSSCG00000008374	ENSSSCG00000022925	0.734067
ENSSSCG00000008374	ENSSSCG00000031262	0.749008
ENSSSCG00000008374	ENSSSCG00000031744	0.701116
ENSSSCG00000008374	ENSSSCG00000032320	0.869007
ENSSSCG00000008374	ENSSSCG00000033175	0.751929
ENSSSCG00000008374	ENSSSCG00000036787	0.748527
ENSSSCG00000008374	ENSSSCG00000038149	0.708585
ENSSSCG00000008374	ENSSSCG00000040728	0.742232
ENSSSCG00000008374	ENSSSCG00000001156	0.791327
ENSSSCG00000008374	ENSSSCG00000004505	0.700759
ENSSSCG00000008374	ENSSSCG00000004576	0.748293
ENSSSCG00000008374	ENSSSCG00000004600	0.71994
ENSSSCG00000008374	ENSSSCG00000004739	0.754034
ENSSSCG00000008374	ENSSSCG00000004938	0.708275
ENSSSCG00000008374	ENSSSCG00000005096	0.790129
ENSSSCG00000008374	ENSSSCG00000006018	0.77825
ENSSSCG00000008374	ENSSSCG00000007311	0.733188
ENSSSCG00000008374	ENSSSCG00000007484	0.740582
ENSSSCG00000008374	ENSSSCG00000008099	0.801692
ENSSSCG00000008374	ENSSSCG00000008334	0.70704
ENSSSCG00000008374	ENSSSCG00000008388	0.738091
ENSSSCG00000008374	ENSSSCG00000009865	0.712106
ENSSSCG00000008374	ENSSSCG00000010224	0.781502
ENSSSCG00000008374	ENSSSCG00000011125	0.7249
ENSSSCG00000008374	ENSSSCG00000011212	0.759457
ENSSSCG00000008374	ENSSSCG00000011743	0.777145
ENSSSCG00000008374	ENSSSCG00000011810	0.709871
ENSSSCG00000008374	ENSSSCG00000011951	0.898725
ENSSSCG00000008374	ENSSSCG00000012029	0.727499
ENSSSCG00000008374	ENSSSCG00000015235	0.851272
ENSSSCG00000008374	ENSSSCG00000015357	0.706763
ENSSSCG00000008374	ENSSSCG00000015393	0.749744
ENSSSCG00000008374	ENSSSCG00000015568	0.701757
ENSSSCG00000008374	ENSSSCG00000016057	0.715576
ENSSSCG00000008374	ENSSSCG00000017604	0.723834
ENSSSCG00000008374	ENSSSCG00000020954	0.724354
ENSSSCG00000008374	ENSSSCG00000021343	0.721141
ENSSSCG00000008374	ENSSSCG00000021646	0.834679
ENSSSCG00000008374	ENSSSCG00000022155	0.723283
ENSSSCG00000008374	ENSSSCG00000024970	0.752557
ENSSSCG00000008374	ENSSSCG00000029998	0.766617
ENSSSCG00000008374	ENSSSCG00000032080	0.826321
ENSSSCG00000008374	ENSSSCG00000032372	0.790951
ENSSSCG00000008374	ENSSSCG00000035212	0.952044
ENSSSCG00000008374	ENSSSCG00000036546	0.722352
ENSSSCG00000008374	ENSSSCG00000038872	0.733847
ENSSSCG00000009152	ENSSSCG00000011451	0.750237
ENSSSCG00000009152	ENSSSCG00000011496	0.72915
ENSSSCG00000009152	ENSSSCG00000012026	0.75261
ENSSSCG00000009152	ENSSSCG00000014168	0.839031
ENSSSCG00000009152	ENSSSCG00000015037	0.842792
ENSSSCG00000009152	ENSSSCG00000017607	0.890528
ENSSSCG00000009152	ENSSSCG00000023133	0.747088
ENSSSCG00000009152	ENSSSCG00000032320	0.750153
ENSSSCG00000009152	ENSSSCG00000038149	0.729901
ENSSSCG00000009152	ENSSSCG00000005096	0.703085
ENSSSCG00000009152	ENSSSCG00000005604	0.716694
ENSSSCG00000009152	ENSSSCG00000007484	0.706167
ENSSSCG00000009152	ENSSSCG00000007767	-0.743378
ENSSSCG00000009152	ENSSSCG00000008334	0.720392
ENSSSCG00000009152	ENSSSCG00000009865	0.744724
ENSSSCG00000009152	ENSSSCG00000010219	0.721078
ENSSSCG00000009152	ENSSSCG00000010224	0.712455
ENSSSCG00000009152	ENSSSCG00000011951	0.747896
ENSSSCG00000009152	ENSSSCG00000012620	0.700978
ENSSSCG00000009152	ENSSSCG00000015235	0.710941
ENSSSCG00000009152	ENSSSCG00000015871	0.739064
ENSSSCG00000009152	ENSSSCG00000024152	0.742216
ENSSSCG00000009152	ENSSSCG00000029998	0.798538
ENSSSCG00000009152	ENSSSCG00000035101	0.758568
ENSSSCG00000009152	ENSSSCG00000037762	-0.751417
ENSSSCG00000009216	ENSSSCG00000012110	0.829643
ENSSSCG00000009216	ENSSSCG00000015037	0.74612
ENSSSCG00000009216	ENSSSCG00000015519	0.725634
ENSSSCG00000009216	ENSSSCG00000017607	0.771218
ENSSSCG00000009216	ENSSSCG00000036555	0.713745
ENSSSCG00000009216	ENSSSCG00000002838	0.707662
ENSSSCG00000009216	ENSSSCG00000005965	0.728236
ENSSSCG00000009216	ENSSSCG00000006625	0.806221
ENSSSCG00000009216	ENSSSCG00000006646	0.739072
ENSSSCG00000009216	ENSSSCG00000007477	0.743671
ENSSSCG00000009216	ENSSSCG00000008119	0.753412
ENSSSCG00000009216	ENSSSCG00000016520	0.732835
ENSSSCG00000009216	ENSSSCG00000017403	0.768055
ENSSSCG00000009216	ENSSSCG00000032381	0.775063
ENSSSCG00000009216	ENSSSCG00000035403	0.787305
ENSSSCG00000009216	ENSSSCG00000035895	0.716338
ENSSSCG00000009605	ENSSSCG00000011075	-0.711353
ENSSSCG00000009605	ENSSSCG00000014156	-0.701423
ENSSSCG00000009605	ENSSSCG00000015283	0.710875
ENSSSCG00000009605	ENSSSCG00000017414	0.775202
ENSSSCG00000009605	ENSSSCG00000036030	0.721372
ENSSSCG00000009605	ENSSSCG00000027060	0.714035
ENSSSCG00000009605	ENSSSCG00000031562	0.710637
ENSSSCG00000009605	ENSSSCG00000037970	0.753617
ENSSSCG00000009801	ENSSSCG00000015283	0.726151
ENSSSCG00000009801	ENSSSCG00000021359	0.714625
ENSSSCG00000009801	ENSSSCG00000021638	0.786373
ENSSSCG00000009801	ENSSSCG00000022687	0.741062
ENSSSCG00000009801	ENSSSCG00000023714	0.798218
ENSSSCG00000009801	ENSSSCG00000034763	-0.751575
ENSSSCG00000010455	ENSSSCG00000011496	0.878684
ENSSSCG00000010455	ENSSSCG00000012026	0.81532
ENSSSCG00000010455	ENSSSCG00000014156	0.870073
ENSSSCG00000010455	ENSSSCG00000014168	0.771824
ENSSSCG00000010455	ENSSSCG00000015519	0.728426
ENSSSCG00000010455	ENSSSCG00000015814	0.938064
ENSSSCG00000010455	ENSSSCG00000016824	0.87295
ENSSSCG00000010455	ENSSSCG00000016898	0.761744
ENSSSCG00000010455	ENSSSCG00000022925	0.716657
ENSSSCG00000010455	ENSSSCG00000031744	0.730595
ENSSSCG00000010455	ENSSSCG00000032320	0.85988
ENSSSCG00000010455	ENSSSCG00000033175	0.866975
ENSSSCG00000010455	ENSSSCG00000036787	0.774233
ENSSSCG00000010455	ENSSSCG00000038132	0.72304
ENSSSCG00000010455	ENSSSCG00000040728	0.769332
ENSSSCG00000010455	ENSSSCG00000004127	0.843676
ENSSSCG00000010455	ENSSSCG00000004387	0.78004
ENSSSCG00000010455	ENSSSCG00000004576	0.733669
ENSSSCG00000010455	ENSSSCG00000004600	0.739866
ENSSSCG00000010455	ENSSSCG00000004739	0.768859
ENSSSCG00000010455	ENSSSCG00000005096	0.738792
ENSSSCG00000010455	ENSSSCG00000006018	0.733957
ENSSSCG00000010455	ENSSSCG00000006346	0.723559
ENSSSCG00000010455	ENSSSCG00000007311	0.723522
ENSSSCG00000010455	ENSSSCG00000007484	0.785922
ENSSSCG00000010455	ENSSSCG00000009865	0.711617
ENSSSCG00000010455	ENSSSCG00000011125	0.715258
ENSSSCG00000010455	ENSSSCG00000011212	0.724484
ENSSSCG00000010455	ENSSSCG00000011743	0.702175
ENSSSCG00000010455	ENSSSCG00000011810	0.779203
ENSSSCG00000010455	ENSSSCG00000011951	0.872463
ENSSSCG00000010455	ENSSSCG00000012029	0.731259
ENSSSCG00000010455	ENSSSCG00000012620	0.703991
ENSSSCG00000010455	ENSSSCG00000014319	0.740115
ENSSSCG00000010455	ENSSSCG00000015235	0.819703
ENSSSCG00000010455	ENSSSCG00000015237	0.719637
ENSSSCG00000010455	ENSSSCG00000015357	0.813887
ENSSSCG00000010455	ENSSSCG00000015393	0.712565
ENSSSCG00000010455	ENSSSCG00000015568	0.702432
ENSSSCG00000010455	ENSSSCG00000016703	0.719765
ENSSSCG00000010455	ENSSSCG00000020954	0.785043
ENSSSCG00000010455	ENSSSCG00000021646	0.876396
ENSSSCG00000010455	ENSSSCG00000022155	0.748303
ENSSSCG00000010455	ENSSSCG00000023357	0.747139
ENSSSCG00000010455	ENSSSCG00000024970	0.7769
ENSSSCG00000010455	ENSSSCG00000025182	0.76701
ENSSSCG00000010455	ENSSSCG00000027017	0.710817
ENSSSCG00000010455	ENSSSCG00000029920	0.705115
ENSSSCG00000010455	ENSSSCG00000029998	0.743014
ENSSSCG00000010455	ENSSSCG00000032080	0.819984
ENSSSCG00000010455	ENSSSCG00000032372	0.773494
ENSSSCG00000010455	ENSSSCG00000035212	0.853591
ENSSSCG00000010455	ENSSSCG00000035673	0.719924
ENSSSCG00000010455	ENSSSCG00000036546	0.800863
ENSSSCG00000010455	ENSSSCG00000039568	0.758323
ENSSSCG00000010456	ENSSSCG00000011133	-0.705851
ENSSSCG00000010456	ENSSSCG00000015550	-0.742584
ENSSSCG00000010456	ENSSSCG00000024219	0.833377
ENSSSCG00000010456	ENSSSCG00000003148	-0.713606
ENSSSCG00000010456	ENSSSCG00000013397	0.72944
ENSSSCG00000010464	ENSSSCG00000011075	0.736147
ENSSSCG00000010464	ENSSSCG00000015519	0.708358
ENSSSCG00000010464	ENSSSCG00000015541	0.748902
ENSSSCG00000010464	ENSSSCG00000017983	0.808848
ENSSSCG00000010464	ENSSSCG00000017986	0.761027
ENSSSCG00000010464	ENSSSCG00000025698	0.734149
ENSSSCG00000010464	ENSSSCG00000028056	0.734954
ENSSSCG00000010464	ENSSSCG00000031154	0.716702
ENSSSCG00000010464	ENSSSCG00000035037	0.822168
ENSSSCG00000010464	ENSSSCG00000036555	0.748774
ENSSSCG00000010464	ENSSSCG00000037201	0.776971
ENSSSCG00000010464	ENSSSCG00000038500	0.835384
ENSSSCG00000010464	ENSSSCG00000038594	0.810806
ENSSSCG00000010464	ENSSSCG00000038727	0.777294
ENSSSCG00000010464	ENSSSCG00000039419	0.784361
ENSSSCG00000010464	ENSSSCG00000002838	0.765897
ENSSSCG00000010464	ENSSSCG00000005965	0.735056
ENSSSCG00000010464	ENSSSCG00000006625	0.73444
ENSSSCG00000010464	ENSSSCG00000008443	0.749211
ENSSSCG00000010464	ENSSSCG00000010224	0.730615
ENSSSCG00000010464	ENSSSCG00000011264	0.73648
ENSSSCG00000010464	ENSSSCG00000015595	0.710444
ENSSSCG00000010464	ENSSSCG00000017376	0.789167
ENSSSCG00000010464	ENSSSCG00000023660	0.746958
ENSSSCG00000010464	ENSSSCG00000026533	0.711045
ENSSSCG00000010464	ENSSSCG00000031321	0.811433
ENSSSCG00000010464	ENSSSCG00000032381	0.709056
ENSSSCG00000010464	ENSSSCG00000032527	0.828725
ENSSSCG00000010464	ENSSSCG00000034207	0.715156
ENSSSCG00000010464	ENSSSCG00000034297	0.708424
ENSSSCG00000010464	ENSSSCG00000036136	0.81695
ENSSSCG00000010464	ENSSSCG00000038911	0.774669
ENSSSCG00000010464	ENSSSCG00000038948	0.752353
ENSSSCG00000010464	ENSSSCG00000040751	0.773711
ENSSSCG00000010517	ENSSSCG00000013178	0.825479
ENSSSCG00000010517	ENSSSCG00000017414	0.760443
ENSSSCG00000010517	ENSSSCG00000017528	0.743072
ENSSSCG00000010517	ENSSSCG00000017885	0.75066
ENSSSCG00000010517	ENSSSCG00000022687	0.72857
ENSSSCG00000010517	ENSSSCG00000001438	0.709335
ENSSSCG00000010517	ENSSSCG00000012287	0.747212
ENSSSCG00000010517	ENSSSCG00000017475	0.748455
ENSSSCG00000010517	ENSSSCG00000017950	0.782953
ENSSSCG00000010517	ENSSSCG00000028190	0.79311
ENSSSCG00000010626	ENSSSCG00000011075	0.837105
ENSSSCG00000010626	ENSSSCG00000011076	0.71838
ENSSSCG00000010626	ENSSSCG00000016605	0.787634
ENSSSCG00000010626	ENSSSCG00000017986	0.802239
ENSSSCG00000010626	ENSSSCG00000022256	0.745955
ENSSSCG00000010626	ENSSSCG00000023105	0.732874
ENSSSCG00000010626	ENSSSCG00000029226	0.811894
ENSSSCG00000010626	ENSSSCG00000029507	0.8007
ENSSSCG00000010626	ENSSSCG00000031154	0.723265
ENSSSCG00000010626	ENSSSCG00000031262	0.70237
ENSSSCG00000010626	ENSSSCG00000034763	0.71342
ENSSSCG00000010626	ENSSSCG00000038374	0.723334
ENSSSCG00000010626	ENSSSCG00000005385	0.773113
ENSSSCG00000010626	ENSSSCG00000005589	0.708121
ENSSSCG00000010626	ENSSSCG00000009370	0.882178
ENSSSCG00000010626	ENSSSCG00000026533	0.707217
ENSSSCG00000010626	ENSSSCG00000034207	0.824813
ENSSSCG00000010626	ENSSSCG00000036136	0.710338
ENSSSCG00000010626	ENSSSCG00000036742	0.802752
ENSSSCG00000010626	ENSSSCG00000040751	0.809073
ENSSSCG00000011075	ENSSSCG00000011076	0.76635
ENSSSCG00000011075	ENSSSCG00000014156	0.811138
ENSSSCG00000011075	ENSSSCG00000014168	0.740932
ENSSSCG00000011075	ENSSSCG00000015037	0.755466
ENSSSCG00000011075	ENSSSCG00000015519	0.767145
ENSSSCG00000011075	ENSSSCG00000016824	0.71513
ENSSSCG00000011075	ENSSSCG00000017983	0.722145
ENSSSCG00000011075	ENSSSCG00000017986	0.850914
ENSSSCG00000011075	ENSSSCG00000022256	0.736785
ENSSSCG00000011075	ENSSSCG00000023105	0.800405
ENSSSCG00000011075	ENSSSCG00000024416	0.708892
ENSSSCG00000011075	ENSSSCG00000025698	0.803545
ENSSSCG00000011075	ENSSSCG00000029507	0.764309
ENSSSCG00000011075	ENSSSCG00000029571	0.716314
ENSSSCG00000011075	ENSSSCG00000031262	0.764329
ENSSSCG00000011075	ENSSSCG00000031744	0.731123
ENSSSCG00000011075	ENSSSCG00000032320	0.784545
ENSSSCG00000011075	ENSSSCG00000035037	0.764212
ENSSSCG00000011075	ENSSSCG00000036555	0.771411
ENSSSCG00000011075	ENSSSCG00000037201	0.867473
ENSSSCG00000011075	ENSSSCG00000038132	0.780088
ENSSSCG00000011075	ENSSSCG00000038149	0.739008
ENSSSCG00000011075	ENSSSCG00000038500	0.8062
ENSSSCG00000011075	ENSSSCG00000038594	0.706797
ENSSSCG00000011075	ENSSSCG00000038727	0.791229
ENSSSCG00000011075	ENSSSCG00000005385	0.816359
ENSSSCG00000011075	ENSSSCG00000005589	0.744287
ENSSSCG00000011075	ENSSSCG00000009370	0.751006
ENSSSCG00000011075	ENSSSCG00000009865	0.781528
ENSSSCG00000011075	ENSSSCG00000010219	0.79157
ENSSSCG00000011075	ENSSSCG00000010224	0.821761
ENSSSCG00000011075	ENSSSCG00000011125	0.805626
ENSSSCG00000011075	ENSSSCG00000015595	0.70137
ENSSSCG00000011075	ENSSSCG00000021646	0.700152
ENSSSCG00000011075	ENSSSCG00000026533	0.78905
ENSSSCG00000011075	ENSSSCG00000027480	0.744282
ENSSSCG00000011075	ENSSSCG00000029998	0.735858
ENSSSCG00000011075	ENSSSCG00000032367	0.718895
ENSSSCG00000011075	ENSSSCG00000032527	0.765015
ENSSSCG00000011075	ENSSSCG00000034207	0.725001
ENSSSCG00000011075	ENSSSCG00000035537	0.785352
ENSSSCG00000011075	ENSSSCG00000036742	0.802989
ENSSSCG00000011075	ENSSSCG00000037766	0.735547
ENSSSCG00000011075	ENSSSCG00000038948	0.708814
ENSSSCG00000011075	ENSSSCG00000040751	0.729578
ENSSSCG00000011076	ENSSSCG00000012026	0.722809
ENSSSCG00000011076	ENSSSCG00000013351	0.716579
ENSSSCG00000011076	ENSSSCG00000014156	0.744217
ENSSSCG00000011076	ENSSSCG00000015519	0.730822
ENSSSCG00000011076	ENSSSCG00000015541	0.775735
ENSSSCG00000011076	ENSSSCG00000016824	0.742994
ENSSSCG00000011076	ENSSSCG00000017986	0.716046
ENSSSCG00000011076	ENSSSCG00000022256	0.793029
ENSSSCG00000011076	ENSSSCG00000022322	0.728071
ENSSSCG00000011076	ENSSSCG00000022925	0.729
ENSSSCG00000011076	ENSSSCG00000023031	0.709609
ENSSSCG00000011076	ENSSSCG00000023105	0.734721
ENSSSCG00000011076	ENSSSCG00000025698	0.720067
ENSSSCG00000011076	ENSSSCG00000028056	0.789838
ENSSSCG00000011076	ENSSSCG00000028322	0.732038
ENSSSCG00000011076	ENSSSCG00000029507	0.768902
ENSSSCG00000011076	ENSSSCG00000031262	0.817326
ENSSSCG00000011076	ENSSSCG00000031744	0.800833
ENSSSCG00000011076	ENSSSCG00000032320	0.71666
ENSSSCG00000011076	ENSSSCG00000035037	0.751163
ENSSSCG00000011076	ENSSSCG00000036787	0.72928
ENSSSCG00000011076	ENSSSCG00000038149	0.796359
ENSSSCG00000011076	ENSSSCG00000038727	0.823137
ENSSSCG00000011076	ENSSSCG00000040366	0.753269
ENSSSCG00000011076	ENSSSCG00000002383	0.787478
ENSSSCG00000011076	ENSSSCG00000005589	0.756777
ENSSSCG00000011076	ENSSSCG00000006018	0.713441
ENSSSCG00000011076	ENSSSCG00000009865	0.701011
ENSSSCG00000011076	ENSSSCG00000010219	0.821516
ENSSSCG00000011076	ENSSSCG00000010224	0.861605
ENSSSCG00000011076	ENSSSCG00000011125	0.811615
ENSSSCG00000011076	ENSSSCG00000011264	0.714742
ENSSSCG00000011076	ENSSSCG00000014336	0.721064
ENSSSCG00000011076	ENSSSCG00000015595	0.713282
ENSSSCG00000011076	ENSSSCG00000015871	0.704063
ENSSSCG00000011076	ENSSSCG00000017251	0.736278
ENSSSCG00000011076	ENSSSCG00000026533	0.758763
ENSSSCG00000011076	ENSSSCG00000032367	0.714871
ENSSSCG00000011076	ENSSSCG00000034297	0.708302
ENSSSCG00000011076	ENSSSCG00000035212	0.701152
ENSSSCG00000011076	ENSSSCG00000036742	0.72745
ENSSSCG00000011076	ENSSSCG00000037766	0.708766
ENSSSCG00000011076	ENSSSCG00000038911	0.788264
ENSSSCG00000011076	ENSSSCG00000038948	0.704441
ENSSSCG00000011133	ENSSSCG00000017983	0.713799
ENSSSCG00000011133	ENSSSCG00000022256	0.726806
ENSSSCG00000011133	ENSSSCG00000035037	0.741509
ENSSSCG00000011133	ENSSSCG00000038500	0.750926
ENSSSCG00000011133	ENSSSCG00000039419	0.746805
ENSSSCG00000011133	ENSSSCG00000032367	0.755488
ENSSSCG00000011133	ENSSSCG00000038911	0.730604
ENSSSCG00000011451	ENSSSCG00000014168	0.805907
ENSSSCG00000011451	ENSSSCG00000017607	0.755305
ENSSSCG00000011451	ENSSSCG00000023806	0.718397
ENSSSCG00000011451	ENSSSCG00000032320	0.702949
ENSSSCG00000011451	ENSSSCG00000033175	0.768729
ENSSSCG00000011451	ENSSSCG00000038500	0.738123
ENSSSCG00000011451	ENSSSCG00000013501	-0.703318
ENSSSCG00000011451	ENSSSCG00000029998	0.74671
ENSSSCG00000011496	ENSSSCG00000012026	0.903299
ENSSSCG00000011496	ENSSSCG00000012110	0.770536
ENSSSCG00000011496	ENSSSCG00000014156	0.85284
ENSSSCG00000011496	ENSSSCG00000014168	0.845866
ENSSSCG00000011496	ENSSSCG00000014251	0.758209
ENSSSCG00000011496	ENSSSCG00000015037	0.763783
ENSSSCG00000011496	ENSSSCG00000015519	0.822918
ENSSSCG00000011496	ENSSSCG00000015814	0.916451
ENSSSCG00000011496	ENSSSCG00000016824	0.913601
ENSSSCG00000011496	ENSSSCG00000016898	0.844042
ENSSSCG00000011496	ENSSSCG00000017607	0.806174
ENSSSCG00000011496	ENSSSCG00000022925	0.792006
ENSSSCG00000011496	ENSSSCG00000023105	0.786837
ENSSSCG00000011496	ENSSSCG00000023133	0.714016
ENSSSCG00000011496	ENSSSCG00000025698	0.80073
ENSSSCG00000011496	ENSSSCG00000031262	0.743621
ENSSSCG00000011496	ENSSSCG00000031744	0.766144
ENSSSCG00000011496	ENSSSCG00000032320	0.92578
ENSSSCG00000011496	ENSSSCG00000033175	0.867755
ENSSSCG00000011496	ENSSSCG00000036555	0.765676
ENSSSCG00000011496	ENSSSCG00000036787	0.866512
ENSSSCG00000011496	ENSSSCG00000038132	0.804724
ENSSSCG00000011496	ENSSSCG00000038149	0.818268
ENSSSCG00000011496	ENSSSCG00000040728	0.782923
ENSSSCG00000011496	ENSSSCG00000001049	0.721058
ENSSSCG00000011496	ENSSSCG00000001061	0.772064
ENSSSCG00000011496	ENSSSCG00000001611	0.778808
ENSSSCG00000011496	ENSSSCG00000004127	0.745232
ENSSSCG00000011496	ENSSSCG00000004332	0.748177
ENSSSCG00000011496	ENSSSCG00000004387	0.796022
ENSSSCG00000011496	ENSSSCG00000004505	0.700983
ENSSSCG00000011496	ENSSSCG00000004600	0.742673
ENSSSCG00000011496	ENSSSCG00000004739	0.755008
ENSSSCG00000011496	ENSSSCG00000005096	0.757932
ENSSSCG00000011496	ENSSSCG00000006018	0.783662
ENSSSCG00000011496	ENSSSCG00000007484	0.92276
ENSSSCG00000011496	ENSSSCG00000007767	-0.749078
ENSSSCG00000011496	ENSSSCG00000008334	0.700101
ENSSSCG00000011496	ENSSSCG00000009865	0.819068
ENSSSCG00000011496	ENSSSCG00000010224	0.805099
ENSSSCG00000011496	ENSSSCG00000011125	0.72275
ENSSSCG00000011496	ENSSSCG00000011594	0.728127
ENSSSCG00000011496	ENSSSCG00000011810	0.767664
ENSSSCG00000011496	ENSSSCG00000011951	0.783499
ENSSSCG00000011496	ENSSSCG00000013501	-0.700731
ENSSSCG00000011496	ENSSSCG00000015235	0.841384
ENSSSCG00000011496	ENSSSCG00000015237	0.839957
ENSSSCG00000011496	ENSSSCG00000015357	0.797644
ENSSSCG00000011496	ENSSSCG00000015982	-0.723606
ENSSSCG00000011496	ENSSSCG00000016057	0.738023
ENSSSCG00000011496	ENSSSCG00000021646	0.842257
ENSSSCG00000011496	ENSSSCG00000022155	0.719129
ENSSSCG00000011496	ENSSSCG00000022760	0.781089
ENSSSCG00000011496	ENSSSCG00000024970	0.791058
ENSSSCG00000011496	ENSSSCG00000025182	0.740501
ENSSSCG00000011496	ENSSSCG00000029998	0.783746
ENSSSCG00000011496	ENSSSCG00000032080	0.769041
ENSSSCG00000011496	ENSSSCG00000035212	0.778104
ENSSSCG00000011496	ENSSSCG00000036314	0.704087
ENSSSCG00000011496	ENSSSCG00000037762	-0.723861
ENSSSCG00000011496	ENSSSCG00000038313	-0.734163
ENSSSCG00000011496	ENSSSCG00000038739	-0.702231
ENSSSCG00000011496	ENSSSCG00000039568	0.820022
ENSSSCG00000012026	ENSSSCG00000012110	0.724224
ENSSSCG00000012026	ENSSSCG00000014156	0.778245
ENSSSCG00000012026	ENSSSCG00000014168	0.827229
ENSSSCG00000012026	ENSSSCG00000015037	0.756372
ENSSSCG00000012026	ENSSSCG00000015519	0.801582
ENSSSCG00000012026	ENSSSCG00000015814	0.862456
ENSSSCG00000012026	ENSSSCG00000016824	0.855757
ENSSSCG00000012026	ENSSSCG00000016898	0.733556
ENSSSCG00000012026	ENSSSCG00000017607	0.770036
ENSSSCG00000012026	ENSSSCG00000021273	0.77143
ENSSSCG00000012026	ENSSSCG00000022925	0.857841
ENSSSCG00000012026	ENSSSCG00000023105	0.7227
ENSSSCG00000012026	ENSSSCG00000023133	0.710898
ENSSSCG00000012026	ENSSSCG00000025698	0.851112
ENSSSCG00000012026	ENSSSCG00000031744	0.820709
ENSSSCG00000012026	ENSSSCG00000032320	0.875256
ENSSSCG00000012026	ENSSSCG00000033175	0.840596
ENSSSCG00000012026	ENSSSCG00000036555	0.755804
ENSSSCG00000012026	ENSSSCG00000036787	0.840536
ENSSSCG00000012026	ENSSSCG00000038132	0.73291
ENSSSCG00000012026	ENSSSCG00000038149	0.852705
ENSSSCG00000012026	ENSSSCG00000040728	0.722389
ENSSSCG00000012026	ENSSSCG00000001049	0.737672
ENSSSCG00000012026	ENSSSCG00000001061	0.709918
ENSSSCG00000012026	ENSSSCG00000004739	0.763363
ENSSSCG00000012026	ENSSSCG00000005096	0.739496
ENSSSCG00000012026	ENSSSCG00000006018	0.847166
ENSSSCG00000012026	ENSSSCG00000007484	0.779777
ENSSSCG00000012026	ENSSSCG00000007767	-0.705746
ENSSSCG00000012026	ENSSSCG00000009865	0.799771
ENSSSCG00000012026	ENSSSCG00000010224	0.866993
ENSSSCG00000012026	ENSSSCG00000011125	0.773187
ENSSSCG00000012026	ENSSSCG00000011810	0.731993
ENSSSCG00000012026	ENSSSCG00000011951	0.819451
ENSSSCG00000012026	ENSSSCG00000012029	0.708295
ENSSSCG00000012026	ENSSSCG00000015235	0.766279
ENSSSCG00000012026	ENSSSCG00000015871	0.740799
ENSSSCG00000012026	ENSSSCG00000016690	0.754804
ENSSSCG00000012026	ENSSSCG00000021646	0.723991
ENSSSCG00000012026	ENSSSCG00000024152	0.71015
ENSSSCG00000012026	ENSSSCG00000024970	0.708668
ENSSSCG00000012026	ENSSSCG00000029998	0.802904
ENSSSCG00000012026	ENSSSCG00000035212	0.81201
ENSSSCG00000012026	ENSSSCG00000037766	0.723468
ENSSSCG00000012026	ENSSSCG00000039568	0.71096
ENSSSCG00000012110	ENSSSCG00000014251	0.730326
ENSSSCG00000012110	ENSSSCG00000015519	0.813929
ENSSSCG00000012110	ENSSSCG00000015814	0.767205
ENSSSCG00000012110	ENSSSCG00000016824	0.710286
ENSSSCG00000012110	ENSSSCG00000016898	0.729486
ENSSSCG00000012110	ENSSSCG00000017607	0.726281
ENSSSCG00000012110	ENSSSCG00000036555	0.721497
ENSSSCG00000012110	ENSSSCG00000036787	0.761406
ENSSSCG00000012110	ENSSSCG00000038149	0.754197
ENSSSCG00000012110	ENSSSCG00000006625	0.771475
ENSSSCG00000012110	ENSSSCG00000006646	0.739786
ENSSSCG00000012110	ENSSSCG00000007484	0.80517
ENSSSCG00000012110	ENSSSCG00000008443	0.726276
ENSSSCG00000012110	ENSSSCG00000015237	0.713908
ENSSSCG00000012110	ENSSSCG00000015733	0.727128
ENSSSCG00000012110	ENSSSCG00000016573	0.75092
ENSSSCG00000012110	ENSSSCG00000032381	0.706211
ENSSSCG00000012110	ENSSSCG00000039568	0.781685
ENSSSCG00000013178	ENSSSCG00000015283	0.773847
ENSSSCG00000013178	ENSSSCG00000017414	0.861855
ENSSSCG00000013178	ENSSSCG00000017528	0.890934
ENSSSCG00000013178	ENSSSCG00000017727	0.771948
ENSSSCG00000013178	ENSSSCG00000017885	0.780748
ENSSSCG00000013178	ENSSSCG00000021436	0.829988
ENSSSCG00000013178	ENSSSCG00000021638	0.819439
ENSSSCG00000013178	ENSSSCG00000022687	0.720865
ENSSSCG00000013178	ENSSSCG00000034494	0.813893
ENSSSCG00000013178	ENSSSCG00000000084	0.72079
ENSSSCG00000013178	ENSSSCG00000000258	0.730016
ENSSSCG00000013178	ENSSSCG00000000702	0.759068
ENSSSCG00000013178	ENSSSCG00000000736	0.76487
ENSSSCG00000013178	ENSSSCG00000001438	0.781171
ENSSSCG00000013178	ENSSSCG00000001474	0.763233
ENSSSCG00000013178	ENSSSCG00000001619	0.700897
ENSSSCG00000013178	ENSSSCG00000001661	0.723332
ENSSSCG00000013178	ENSSSCG00000002388	0.718576
ENSSSCG00000013178	ENSSSCG00000002769	0.785917
ENSSSCG00000013178	ENSSSCG00000002885	0.784608
ENSSSCG00000013178	ENSSSCG00000003030	0.704235
ENSSSCG00000013178	ENSSSCG00000005318	0.797921
ENSSSCG00000013178	ENSSSCG00000006018	-0.721145
ENSSSCG00000013178	ENSSSCG00000006468	0.744545
ENSSSCG00000013178	ENSSSCG00000007958	0.731936
ENSSSCG00000013178	ENSSSCG00000012287	0.83343
ENSSSCG00000013178	ENSSSCG00000012981	0.837242
ENSSSCG00000013178	ENSSSCG00000013028	0.811931
ENSSSCG00000013178	ENSSSCG00000013241	0.72269
ENSSSCG00000013178	ENSSSCG00000013764	0.758064
ENSSSCG00000013178	ENSSSCG00000013873	0.72129
ENSSSCG00000013178	ENSSSCG00000015112	0.779415
ENSSSCG00000013178	ENSSSCG00000015211	0.740884
ENSSSCG00000013178	ENSSSCG00000015982	0.708617
ENSSSCG00000013178	ENSSSCG00000015987	-0.730172
ENSSSCG00000013178	ENSSSCG00000016690	-0.742224
ENSSSCG00000013178	ENSSSCG00000017125	0.740684
ENSSSCG00000013178	ENSSSCG00000017397	0.759105
ENSSSCG00000013178	ENSSSCG00000017406	0.707713
ENSSSCG00000013178	ENSSSCG00000017475	0.829807
ENSSSCG00000013178	ENSSSCG00000017516	0.826858
ENSSSCG00000013178	ENSSSCG00000017950	0.79489
ENSSSCG00000013178	ENSSSCG00000025321	0.727497
ENSSSCG00000013178	ENSSSCG00000026103	0.761855
ENSSSCG00000013178	ENSSSCG00000028190	0.822002
ENSSSCG00000013178	ENSSSCG00000029998	-0.737693
ENSSSCG00000013178	ENSSSCG00000032372	-0.730618
ENSSSCG00000013178	ENSSSCG00000034654	0.797854
ENSSSCG00000013178	ENSSSCG00000034708	0.763913
ENSSSCG00000013178	ENSSSCG00000035969	0.716578
ENSSSCG00000013178	ENSSSCG00000036340	0.776832
ENSSSCG00000013178	ENSSSCG00000036933	0.804753
ENSSSCG00000013178	ENSSSCG00000037762	0.721124
ENSSSCG00000013351	ENSSSCG00000015541	0.715903
ENSSSCG00000013351	ENSSSCG00000015550	0.879045
ENSSSCG00000013351	ENSSSCG00000021273	0.731248
ENSSSCG00000013351	ENSSSCG00000022925	0.74647
ENSSSCG00000013351	ENSSSCG00000028056	0.797594
ENSSSCG00000013351	ENSSSCG00000031744	0.754973
ENSSSCG00000013351	ENSSSCG00000035037	0.745971
ENSSSCG00000013351	ENSSSCG00000038149	0.797076
ENSSSCG00000013351	ENSSSCG00000038727	0.728662
ENSSSCG00000013351	ENSSSCG00000040366	0.84302
ENSSSCG00000013351	ENSSSCG00000001049	0.702571
ENSSSCG00000013351	ENSSSCG00000002383	0.762867
ENSSSCG00000013351	ENSSSCG00000005965	0.733454
ENSSSCG00000013351	ENSSSCG00000006625	0.70932
ENSSSCG00000013351	ENSSSCG00000006646	0.723178
ENSSSCG00000013351	ENSSSCG00000008443	0.728998
ENSSSCG00000013351	ENSSSCG00000010224	0.830455
ENSSSCG00000013351	ENSSSCG00000010638	0.798338
ENSSSCG00000013351	ENSSSCG00000014336	0.749934
ENSSSCG00000013351	ENSSSCG00000015871	0.700953
ENSSSCG00000013351	ENSSSCG00000017376	0.723829
ENSSSCG00000013351	ENSSSCG00000017546	0.749394
ENSSSCG00000013351	ENSSSCG00000023894	0.716453
ENSSSCG00000013351	ENSSSCG00000031321	0.737869
ENSSSCG00000013351	ENSSSCG00000031616	0.770895
ENSSSCG00000013351	ENSSSCG00000032171	0.717317
ENSSSCG00000013351	ENSSSCG00000034297	0.713184
ENSSSCG00000013351	ENSSSCG00000038911	0.877831
ENSSSCG00000014156	ENSSSCG00000014168	0.849651
ENSSSCG00000014156	ENSSSCG00000015519	0.70519
ENSSSCG00000014156	ENSSSCG00000015814	0.855007
ENSSSCG00000014156	ENSSSCG00000016824	0.86086
ENSSSCG00000014156	ENSSSCG00000016898	0.7277
ENSSSCG00000014156	ENSSSCG00000017414	-0.741695
ENSSSCG00000014156	ENSSSCG00000017986	0.709673
ENSSSCG00000014156	ENSSSCG00000023105	0.827488
ENSSSCG00000014156	ENSSSCG00000025698	0.730825
ENSSSCG00000014156	ENSSSCG00000031262	0.826122
ENSSSCG00000014156	ENSSSCG00000031744	0.759124
ENSSSCG00000014156	ENSSSCG00000032320	0.910106
ENSSSCG00000014156	ENSSSCG00000033175	0.805194
ENSSSCG00000014156	ENSSSCG00000036030	-0.761755
ENSSSCG00000014156	ENSSSCG00000036787	0.778237
ENSSSCG00000014156	ENSSSCG00000038132	0.782406
ENSSSCG00000014156	ENSSSCG00000038149	0.753161
ENSSSCG00000014156	ENSSSCG00000040728	0.744123
ENSSSCG00000014156	ENSSSCG00000004127	0.708487
ENSSSCG00000014156	ENSSSCG00000004138	0.716153
ENSSSCG00000014156	ENSSSCG00000004387	0.729986
ENSSSCG00000014156	ENSSSCG00000004576	0.716882
ENSSSCG00000014156	ENSSSCG00000004600	0.725273
ENSSSCG00000014156	ENSSSCG00000004739	0.751258
ENSSSCG00000014156	ENSSSCG00000006018	0.798094
ENSSSCG00000014156	ENSSSCG00000007484	0.769163
ENSSSCG00000014156	ENSSSCG00000008334	0.752096
ENSSSCG00000014156	ENSSSCG00000009865	0.766668
ENSSSCG00000014156	ENSSSCG00000010219	0.770039
ENSSSCG00000014156	ENSSSCG00000010224	0.757375
ENSSSCG00000014156	ENSSSCG00000011125	0.80103
ENSSSCG00000014156	ENSSSCG00000011951	0.827704
ENSSSCG00000014156	ENSSSCG00000012029	0.756417
ENSSSCG00000014156	ENSSSCG00000015235	0.775689
ENSSSCG00000014156	ENSSSCG00000015982	-0.701281
ENSSSCG00000014156	ENSSSCG00000021646	0.925367
ENSSSCG00000014156	ENSSSCG00000022760	0.709188
ENSSSCG00000014156	ENSSSCG00000024970	0.715233
ENSSSCG00000014156	ENSSSCG00000026894	0.733667
ENSSSCG00000014156	ENSSSCG00000029998	0.798392
ENSSSCG00000014156	ENSSSCG00000032080	0.784388
ENSSSCG00000014156	ENSSSCG00000032372	0.744963
ENSSSCG00000014156	ENSSSCG00000034654	-0.728373
ENSSSCG00000014156	ENSSSCG00000035212	0.846621
ENSSSCG00000014156	ENSSSCG00000035673	0.772792
ENSSSCG00000014156	ENSSSCG00000036033	0.708177
ENSSSCG00000014156	ENSSSCG00000037762	-0.714767
ENSSSCG00000014168	ENSSSCG00000015037	0.806624
ENSSSCG00000014168	ENSSSCG00000015814	0.799136
ENSSSCG00000014168	ENSSSCG00000016824	0.825811
ENSSSCG00000014168	ENSSSCG00000016898	0.767976
ENSSSCG00000014168	ENSSSCG00000017414	-0.78113
ENSSSCG00000014168	ENSSSCG00000017528	-0.769323
ENSSSCG00000014168	ENSSSCG00000017607	0.790549
ENSSSCG00000014168	ENSSSCG00000017885	-0.723001
ENSSSCG00000014168	ENSSSCG00000021436	-0.763041
ENSSSCG00000014168	ENSSSCG00000023105	0.742584
ENSSSCG00000014168	ENSSSCG00000023133	0.701087
ENSSSCG00000014168	ENSSSCG00000023806	0.715907
ENSSSCG00000014168	ENSSSCG00000025698	0.753879
ENSSSCG00000014168	ENSSSCG00000031262	0.755089
ENSSSCG00000014168	ENSSSCG00000031744	0.77523
ENSSSCG00000014168	ENSSSCG00000032320	0.886294
ENSSSCG00000014168	ENSSSCG00000033175	0.8948
ENSSSCG00000014168	ENSSSCG00000034494	-0.780523
ENSSSCG00000014168	ENSSSCG00000037201	0.706125
ENSSSCG00000014168	ENSSSCG00000038132	0.751067
ENSSSCG00000014168	ENSSSCG00000038149	0.704681
ENSSSCG00000014168	ENSSSCG00000038500	0.709893
ENSSSCG00000014168	ENSSSCG00000040728	0.822674
ENSSSCG00000014168	ENSSSCG00000000902	0.713132
ENSSSCG00000014168	ENSSSCG00000001061	0.705333
ENSSSCG00000014168	ENSSSCG00000001708	0.735743
ENSSSCG00000014168	ENSSSCG00000004127	0.750605
ENSSSCG00000014168	ENSSSCG00000004138	0.726771
ENSSSCG00000014168	ENSSSCG00000004600	0.788621
ENSSSCG00000014168	ENSSSCG00000004739	0.792342
ENSSSCG00000014168	ENSSSCG00000004938	0.708005
ENSSSCG00000014168	ENSSSCG00000005096	0.817578
ENSSSCG00000014168	ENSSSCG00000005604	0.702247
ENSSSCG00000014168	ENSSSCG00000006018	0.832658
ENSSSCG00000014168	ENSSSCG00000006155	0.742348
ENSSSCG00000014168	ENSSSCG00000006331	0.779578
ENSSSCG00000014168	ENSSSCG00000006346	0.764483
ENSSSCG00000014168	ENSSSCG00000007311	0.802784
ENSSSCG00000014168	ENSSSCG00000007484	0.816198
ENSSSCG00000014168	ENSSSCG00000007559	-0.704708
ENSSSCG00000014168	ENSSSCG00000007767	-0.77977
ENSSSCG00000014168	ENSSSCG00000009865	0.813187
ENSSSCG00000014168	ENSSSCG00000010219	0.770031
ENSSSCG00000014168	ENSSSCG00000010224	0.746601
ENSSSCG00000014168	ENSSSCG00000011125	0.733638
ENSSSCG00000014168	ENSSSCG00000011951	0.854039
ENSSSCG00000014168	ENSSSCG00000012029	0.82962
ENSSSCG00000014168	ENSSSCG00000012620	0.750173
ENSSSCG00000014168	ENSSSCG00000012850	-0.717351
ENSSSCG00000014168	ENSSSCG00000013028	-0.717629
ENSSSCG00000014168	ENSSSCG00000013501	-0.786672
ENSSSCG00000014168	ENSSSCG00000015235	0.833866
ENSSSCG00000014168	ENSSSCG00000015357	0.700598
ENSSSCG00000014168	ENSSSCG00000015871	0.740828
ENSSSCG00000014168	ENSSSCG00000015982	-0.793409
ENSSSCG00000014168	ENSSSCG00000016690	0.70386
ENSSSCG00000014168	ENSSSCG00000021343	0.7578
ENSSSCG00000014168	ENSSSCG00000021646	0.889704
ENSSSCG00000014168	ENSSSCG00000022318	0.721013
ENSSSCG00000014168	ENSSSCG00000023357	0.737725
ENSSSCG00000014168	ENSSSCG00000024970	0.737218
ENSSSCG00000014168	ENSSSCG00000026894	0.736328
ENSSSCG00000014168	ENSSSCG00000027017	0.77771
ENSSSCG00000014168	ENSSSCG00000029998	0.888901
ENSSSCG00000014168	ENSSSCG00000031562	-0.714119
ENSSSCG00000014168	ENSSSCG00000032372	0.778763
ENSSSCG00000014168	ENSSSCG00000034191	0.713449
ENSSSCG00000014168	ENSSSCG00000034395	0.700896
ENSSSCG00000014168	ENSSSCG00000035212	0.757908
ENSSSCG00000014168	ENSSSCG00000036546	0.714765
ENSSSCG00000014168	ENSSSCG00000036933	-0.774072
ENSSSCG00000014168	ENSSSCG00000037762	-0.803475
ENSSSCG00000014168	ENSSSCG00000037766	0.796308
ENSSSCG00000014168	ENSSSCG00000038253	0.702446
ENSSSCG00000014168	ENSSSCG00000038313	-0.767417
ENSSSCG00000014168	ENSSSCG00000040107	-0.741078
ENSSSCG00000014168	ENSSSCG00000040959	0.715329
ENSSSCG00000014251	ENSSSCG00000015519	0.703651
ENSSSCG00000014251	ENSSSCG00000016824	0.757044
ENSSSCG00000014251	ENSSSCG00000016898	0.741977
ENSSSCG00000014251	ENSSSCG00000021273	0.714809
ENSSSCG00000014251	ENSSSCG00000031744	0.726566
ENSSSCG00000014251	ENSSSCG00000038149	0.725209
ENSSSCG00000014251	ENSSSCG00000040728	0.712459
ENSSSCG00000014251	ENSSSCG00000001049	0.720045
ENSSSCG00000014251	ENSSSCG00000004332	0.779635
ENSSSCG00000014251	ENSSSCG00000004387	0.781166
ENSSSCG00000014251	ENSSSCG00000006331	0.701635
ENSSSCG00000014251	ENSSSCG00000006646	0.711795
ENSSSCG00000014251	ENSSSCG00000007484	0.768485
ENSSSCG00000014251	ENSSSCG00000011594	0.768421
ENSSSCG00000014251	ENSSSCG00000039161	0.732988
ENSSSCG00000015037	ENSSSCG00000015519	0.777558
ENSSSCG00000015037	ENSSSCG00000016824	0.724267
ENSSSCG00000015037	ENSSSCG00000017607	0.858683
ENSSSCG00000015037	ENSSSCG00000017983	0.727347
ENSSSCG00000015037	ENSSSCG00000017986	0.754771
ENSSSCG00000015037	ENSSSCG00000023105	0.722214
ENSSSCG00000015037	ENSSSCG00000023133	0.757137
ENSSSCG00000015037	ENSSSCG00000025698	0.842062
ENSSSCG00000015037	ENSSSCG00000032320	0.761962
ENSSSCG00000015037	ENSSSCG00000035037	0.80749
ENSSSCG00000015037	ENSSSCG00000036555	0.746122
ENSSSCG00000015037	ENSSSCG00000037201	0.784316
ENSSSCG00000015037	ENSSSCG00000038132	0.730462
ENSSSCG00000015037	ENSSSCG00000038500	0.822328
ENSSSCG00000015037	ENSSSCG00000038594	0.806851
ENSSSCG00000015037	ENSSSCG00000038727	0.704603
ENSSSCG00000015037	ENSSSCG00000005965	0.707204
ENSSSCG00000015037	ENSSSCG00000007484	0.737721
ENSSSCG00000015037	ENSSSCG00000009865	0.783954
ENSSSCG00000015037	ENSSSCG00000010224	0.786661
ENSSSCG00000015037	ENSSSCG00000011125	0.709884
ENSSSCG00000015037	ENSSSCG00000015595	0.706044
ENSSSCG00000015037	ENSSSCG00000015871	0.740191
ENSSSCG00000015037	ENSSSCG00000026533	0.70462
ENSSSCG00000015037	ENSSSCG00000027480	0.701246
ENSSSCG00000015037	ENSSSCG00000029998	0.73524
ENSSSCG00000015037	ENSSSCG00000032367	0.773974
ENSSSCG00000015037	ENSSSCG00000032527	0.81574
ENSSSCG00000015037	ENSSSCG00000037766	0.723603
ENSSSCG00000015037	ENSSSCG00000038948	0.709906
ENSSSCG00000015283	ENSSSCG00000017414	0.820638
ENSSSCG00000015283	ENSSSCG00000017528	0.795154
ENSSSCG00000015283	ENSSSCG00000017727	0.780424
ENSSSCG00000015283	ENSSSCG00000017885	0.747517
ENSSSCG00000015283	ENSSSCG00000021359	0.738422
ENSSSCG00000015283	ENSSSCG00000021436	0.783107
ENSSSCG00000015283	ENSSSCG00000021638	0.885508
ENSSSCG00000015283	ENSSSCG00000022687	0.809589
ENSSSCG00000015283	ENSSSCG00000033032	0.734509
ENSSSCG00000015283	ENSSSCG00000036030	0.838317
ENSSSCG00000015283	ENSSSCG00000000258	0.723323
ENSSSCG00000015283	ENSSSCG00000000702	0.72836
ENSSSCG00000015283	ENSSSCG00000001619	0.795327
ENSSSCG00000015283	ENSSSCG00000003407	0.783388
ENSSSCG00000015283	ENSSSCG00000007958	0.741264
ENSSSCG00000015283	ENSSSCG00000008241	0.710221
ENSSSCG00000015283	ENSSSCG00000012287	0.720093
ENSSSCG00000015283	ENSSSCG00000013375	0.735018
ENSSSCG00000015283	ENSSSCG00000013764	0.712516
ENSSSCG00000015283	ENSSSCG00000016701	0.704772
ENSSSCG00000015283	ENSSSCG00000017475	0.765869
ENSSSCG00000015283	ENSSSCG00000023653	0.781243
ENSSSCG00000015283	ENSSSCG00000026103	0.844435
ENSSSCG00000015283	ENSSSCG00000037762	0.720991
ENSSSCG00000015283	ENSSSCG00000037970	0.786294
ENSSSCG00000015519	ENSSSCG00000015814	0.824231
ENSSSCG00000015519	ENSSSCG00000016824	0.852126
ENSSSCG00000015519	ENSSSCG00000016898	0.756352
ENSSSCG00000015519	ENSSSCG00000017607	0.734645
ENSSSCG00000015519	ENSSSCG00000017983	0.780001
ENSSSCG00000015519	ENSSSCG00000017986	0.710082
ENSSSCG00000015519	ENSSSCG00000021273	0.751158
ENSSSCG00000015519	ENSSSCG00000022925	0.828613
ENSSSCG00000015519	ENSSSCG00000023105	0.78903
ENSSSCG00000015519	ENSSSCG00000023133	0.715333
ENSSSCG00000015519	ENSSSCG00000025698	0.852814
ENSSSCG00000015519	ENSSSCG00000028056	0.7359
ENSSSCG00000015519	ENSSSCG00000031154	0.711826
ENSSSCG00000015519	ENSSSCG00000031262	0.756968
ENSSSCG00000015519	ENSSSCG00000031744	0.829041
ENSSSCG00000015519	ENSSSCG00000032320	0.818902
ENSSSCG00000015519	ENSSSCG00000033175	0.725326
ENSSSCG00000015519	ENSSSCG00000035037	0.821705
ENSSSCG00000015519	ENSSSCG00000036555	0.840892
ENSSSCG00000015519	ENSSSCG00000036787	0.828383
ENSSSCG00000015519	ENSSSCG00000037201	0.738814
ENSSSCG00000015519	ENSSSCG00000038132	0.843158
ENSSSCG00000015519	ENSSSCG00000038149	0.822219
ENSSSCG00000015519	ENSSSCG00000038500	0.804451
ENSSSCG00000015519	ENSSSCG00000038594	0.731341
ENSSSCG00000015519	ENSSSCG00000038727	0.702975
ENSSSCG00000015519	ENSSSCG00000001049	0.710737
ENSSSCG00000015519	ENSSSCG00000005965	0.718704
ENSSSCG00000015519	ENSSSCG00000006625	0.799423
ENSSSCG00000015519	ENSSSCG00000006646	0.721638
ENSSSCG00000015519	ENSSSCG00000007484	0.808802
ENSSSCG00000015519	ENSSSCG00000008443	0.826188
ENSSSCG00000015519	ENSSSCG00000009370	0.717445
ENSSSCG00000015519	ENSSSCG00000009865	0.876358
ENSSSCG00000015519	ENSSSCG00000010224	0.865831
ENSSSCG00000015519	ENSSSCG00000011125	0.857536
ENSSSCG00000015519	ENSSSCG00000015733	0.760392
ENSSSCG00000015519	ENSSSCG00000017376	0.734225
ENSSSCG00000015519	ENSSSCG00000022760	0.718425
ENSSSCG00000015519	ENSSSCG00000024152	0.738007
ENSSSCG00000015519	ENSSSCG00000029998	0.730684
ENSSSCG00000015519	ENSSSCG00000030095	0.73097
ENSSSCG00000015519	ENSSSCG00000032527	0.795646
ENSSSCG00000015519	ENSSSCG00000038911	0.761847
ENSSSCG00000015519	ENSSSCG00000038948	0.78876
ENSSSCG00000015541	ENSSSCG00000017983	0.779068
ENSSSCG00000015541	ENSSSCG00000017986	0.704818
ENSSSCG00000015541	ENSSSCG00000028056	0.878199
ENSSSCG00000015541	ENSSSCG00000028322	0.790543
ENSSSCG00000015541	ENSSSCG00000029226	0.803485
ENSSSCG00000015541	ENSSSCG00000029507	0.781358
ENSSSCG00000015541	ENSSSCG00000029571	0.703382
ENSSSCG00000015541	ENSSSCG00000031262	0.746653
ENSSSCG00000015541	ENSSSCG00000035037	0.829582
ENSSSCG00000015541	ENSSSCG00000038374	0.791598
ENSSSCG00000015541	ENSSSCG00000038500	0.717219
ENSSSCG00000015541	ENSSSCG00000038727	0.797717
ENSSSCG00000015541	ENSSSCG00000039419	0.765663
ENSSSCG00000015541	ENSSSCG00000040366	0.777858
ENSSSCG00000015541	ENSSSCG00000002383	0.816779
ENSSSCG00000015541	ENSSSCG00000010224	0.749128
ENSSSCG00000015541	ENSSSCG00000011125	0.719254
ENSSSCG00000015541	ENSSSCG00000011264	0.764127
ENSSSCG00000015541	ENSSSCG00000014336	0.704671
ENSSSCG00000015541	ENSSSCG00000031321	0.811245
ENSSSCG00000015541	ENSSSCG00000032527	0.75166
ENSSSCG00000015541	ENSSSCG00000032613	0.703512
ENSSSCG00000015541	ENSSSCG00000034207	0.722273
ENSSSCG00000015541	ENSSSCG00000034297	0.768153
ENSSSCG00000015541	ENSSSCG00000038911	0.857797
ENSSSCG00000015541	ENSSSCG00000038948	0.755881
ENSSSCG00000015541	ENSSSCG00000040751	0.753879
ENSSSCG00000015550	ENSSSCG00000022256	0.700531
ENSSSCG00000015550	ENSSSCG00000022925	0.816069
ENSSSCG00000015550	ENSSSCG00000023133	0.726566
ENSSSCG00000015550	ENSSSCG00000028056	0.778821
ENSSSCG00000015550	ENSSSCG00000028322	0.703421
ENSSSCG00000015550	ENSSSCG00000038149	0.762543
ENSSSCG00000015550	ENSSSCG00000038500	0.711015
ENSSSCG00000015550	ENSSSCG00000039419	0.787359
ENSSSCG00000015550	ENSSSCG00000040366	0.825414
ENSSSCG00000015550	ENSSSCG00000000396	0.736275
ENSSSCG00000015550	ENSSSCG00000002383	0.749494
ENSSSCG00000015550	ENSSSCG00000005965	0.733303
ENSSSCG00000015550	ENSSSCG00000006625	0.712411
ENSSSCG00000015550	ENSSSCG00000008443	0.707724
ENSSSCG00000015550	ENSSSCG00000010224	0.77753
ENSSSCG00000015550	ENSSSCG00000014336	0.747818
ENSSSCG00000015550	ENSSSCG00000023894	0.787594
ENSSSCG00000015550	ENSSSCG00000031321	0.71913
ENSSSCG00000015550	ENSSSCG00000031616	0.752176
ENSSSCG00000015550	ENSSSCG00000032367	0.739075
ENSSSCG00000015550	ENSSSCG00000032613	0.735944
ENSSSCG00000015550	ENSSSCG00000032644	0.722502
ENSSSCG00000015550	ENSSSCG00000034297	0.749458
ENSSSCG00000015550	ENSSSCG00000038911	0.818808
ENSSSCG00000015814	ENSSSCG00000016824	0.899129
ENSSSCG00000015814	ENSSSCG00000016898	0.827737
ENSSSCG00000015814	ENSSSCG00000017607	0.718099
ENSSSCG00000015814	ENSSSCG00000022925	0.807765
ENSSSCG00000015814	ENSSSCG00000023105	0.741357
ENSSSCG00000015814	ENSSSCG00000025698	0.735632
ENSSSCG00000015814	ENSSSCG00000031744	0.814579
ENSSSCG00000015814	ENSSSCG00000032320	0.899989
ENSSSCG00000015814	ENSSSCG00000033175	0.875596
ENSSSCG00000015814	ENSSSCG00000036555	0.72288
ENSSSCG00000015814	ENSSSCG00000036787	0.865438
ENSSSCG00000015814	ENSSSCG00000038132	0.79055
ENSSSCG00000015814	ENSSSCG00000038149	0.80252
ENSSSCG00000015814	ENSSSCG00000040728	0.784032
ENSSSCG00000015814	ENSSSCG00000001049	0.71036
ENSSSCG00000015814	ENSSSCG00000004127	0.775235
ENSSSCG00000015814	ENSSSCG00000004387	0.80123
ENSSSCG00000015814	ENSSSCG00000004600	0.702213
ENSSSCG00000015814	ENSSSCG00000004739	0.760785
ENSSSCG00000015814	ENSSSCG00000006018	0.779139
ENSSSCG00000015814	ENSSSCG00000007484	0.858344
ENSSSCG00000015814	ENSSSCG00000008334	0.715128
ENSSSCG00000015814	ENSSSCG00000009865	0.777347
ENSSSCG00000015814	ENSSSCG00000010224	0.790149
ENSSSCG00000015814	ENSSSCG00000011125	0.75827
ENSSSCG00000015814	ENSSSCG00000011594	0.726467
ENSSSCG00000015814	ENSSSCG00000011810	0.759671
ENSSSCG00000015814	ENSSSCG00000011951	0.84305
ENSSSCG00000015814	ENSSSCG00000015235	0.797554
ENSSSCG00000015814	ENSSSCG00000015237	0.730543
ENSSSCG00000015814	ENSSSCG00000015357	0.755565
ENSSSCG00000015814	ENSSSCG00000016703	0.707975
ENSSSCG00000015814	ENSSSCG00000021646	0.837574
ENSSSCG00000015814	ENSSSCG00000022155	0.736184
ENSSSCG00000015814	ENSSSCG00000022760	0.727765
ENSSSCG00000015814	ENSSSCG00000024970	0.746283
ENSSSCG00000015814	ENSSSCG00000025182	0.771938
ENSSSCG00000015814	ENSSSCG00000029998	0.758937
ENSSSCG00000015814	ENSSSCG00000032080	0.840752
ENSSSCG00000015814	ENSSSCG00000035212	0.821881
ENSSSCG00000015814	ENSSSCG00000036546	0.711945
ENSSSCG00000015814	ENSSSCG00000039568	0.763221
ENSSSCG00000016338	ENSSSCG00000017983	0.712764
ENSSSCG00000016338	ENSSSCG00000024416	0.724173
ENSSSCG00000016338	ENSSSCG00000038500	0.70488
ENSSSCG00000016338	ENSSSCG00000003148	0.743336
ENSSSCG00000016338	ENSSSCG00000011618	0.755965
ENSSSCG00000016338	ENSSSCG00000017376	0.756067
ENSSSCG00000016338	ENSSSCG00000026006	0.761761
ENSSSCG00000016338	ENSSSCG00000029578	0.711911
ENSSSCG00000016338	ENSSSCG00000031321	0.786181
ENSSSCG00000016338	ENSSSCG00000038911	0.710651
ENSSSCG00000016605	ENSSSCG00000017986	0.709076
ENSSSCG00000016605	ENSSSCG00000004138	0.735471
ENSSSCG00000016824	ENSSSCG00000016898	0.80618
ENSSSCG00000016824	ENSSSCG00000017607	0.713779
ENSSSCG00000016824	ENSSSCG00000022925	0.793236
ENSSSCG00000016824	ENSSSCG00000023105	0.819412
ENSSSCG00000016824	ENSSSCG00000025698	0.786474
ENSSSCG00000016824	ENSSSCG00000031262	0.809394
ENSSSCG00000016824	ENSSSCG00000031744	0.811048
ENSSSCG00000016824	ENSSSCG00000032320	0.931433
ENSSSCG00000016824	ENSSSCG00000033175	0.795175
ENSSSCG00000016824	ENSSSCG00000036555	0.758043
ENSSSCG00000016824	ENSSSCG00000036787	0.839122
ENSSSCG00000016824	ENSSSCG00000038132	0.786325
ENSSSCG00000016824	ENSSSCG00000038149	0.811902
ENSSSCG00000016824	ENSSSCG00000040728	0.78028
ENSSSCG00000016824	ENSSSCG00000001049	0.702763
ENSSSCG00000016824	ENSSSCG00000001061	0.735241
ENSSSCG00000016824	ENSSSCG00000001611	0.780329
ENSSSCG00000016824	ENSSSCG00000004332	0.722336
ENSSSCG00000016824	ENSSSCG00000004387	0.739353
ENSSSCG00000016824	ENSSSCG00000004505	0.732501
ENSSSCG00000016824	ENSSSCG00000004739	0.751683
ENSSSCG00000016824	ENSSSCG00000006018	0.78506
ENSSSCG00000016824	ENSSSCG00000006646	0.710126
ENSSSCG00000016824	ENSSSCG00000007484	0.897537
ENSSSCG00000016824	ENSSSCG00000008334	0.750446
ENSSSCG00000016824	ENSSSCG00000009865	0.845218
ENSSSCG00000016824	ENSSSCG00000010219	0.719794
ENSSSCG00000016824	ENSSSCG00000010224	0.852032
ENSSSCG00000016824	ENSSSCG00000011125	0.818924
ENSSSCG00000016824	ENSSSCG00000011594	0.733378
ENSSSCG00000016824	ENSSSCG00000011951	0.787752
ENSSSCG00000016824	ENSSSCG00000012620	0.740816
ENSSSCG00000016824	ENSSSCG00000015235	0.811993
ENSSSCG00000016824	ENSSSCG00000015237	0.785615
ENSSSCG00000016824	ENSSSCG00000016057	0.733913
ENSSSCG00000016824	ENSSSCG00000021646	0.848719
ENSSSCG00000016824	ENSSSCG00000022760	0.822652
ENSSSCG00000016824	ENSSSCG00000024152	0.70324
[truncated: 7,150 more rows]

## Sheet: PCIT_ALT0ALT2_mRNAs
Table S7: miRNA-to-mRNA interactions detected as relevant by PCIT in the AL-T0/AL-T2 contrast.
From	To	Weight
ENSSSCG00000000014	ENSSSCG00000000063	0.741418
ENSSSCG00000000014	ENSSSCG00000000695	0.726239
ENSSSCG00000000014	ENSSSCG00000001892	0.81023
ENSSSCG00000000014	ENSSSCG00000001898	0.766324
ENSSSCG00000000014	ENSSSCG00000002392	0.763138
ENSSSCG00000000014	ENSSSCG00000002412	0.753419
ENSSSCG00000000014	ENSSSCG00000003549	0.733804
ENSSSCG00000000014	ENSSSCG00000004399	0.813198
ENSSSCG00000000014	ENSSSCG00000004929	0.761102
ENSSSCG00000000014	ENSSSCG00000004954	0.730753
ENSSSCG00000000014	ENSSSCG00000005301	0.818266
ENSSSCG00000000014	ENSSSCG00000005501	0.805186
ENSSSCG00000000014	ENSSSCG00000006698	0.768146
ENSSSCG00000000014	ENSSSCG00000006740	0.766514
ENSSSCG00000000014	ENSSSCG00000006893	0.76722
ENSSSCG00000000014	ENSSSCG00000007317	0.731316
ENSSSCG00000000014	ENSSSCG00000008349	0.82028
ENSSSCG00000000014	ENSSSCG00000009801	0.767291
ENSSSCG00000000014	ENSSSCG00000010118	0.777414
ENSSSCG00000000014	ENSSSCG00000010330	0.749981
ENSSSCG00000000014	ENSSSCG00000010456	0.764743
ENSSSCG00000000014	ENSSSCG00000010822	0.797413
ENSSSCG00000000014	ENSSSCG00000010992	0.775873
ENSSSCG00000000014	ENSSSCG00000011199	-0.703444
ENSSSCG00000000014	ENSSSCG00000011350	0.857098
ENSSSCG00000000014	ENSSSCG00000011401	0.748489
ENSSSCG00000000014	ENSSSCG00000011670	0.725597
ENSSSCG00000000014	ENSSSCG00000012361	0.747233
ENSSSCG00000000014	ENSSSCG00000012875	0.737746
ENSSSCG00000000014	ENSSSCG00000013784	0.778429
ENSSSCG00000000014	ENSSSCG00000014056	0.708046
ENSSSCG00000000014	ENSSSCG00000015242	0.719789
ENSSSCG00000000014	ENSSSCG00000015283	0.846702
ENSSSCG00000000014	ENSSSCG00000015334	-0.759178
ENSSSCG00000000014	ENSSSCG00000015613	0.718814
ENSSSCG00000000014	ENSSSCG00000017134	0.717901
ENSSSCG00000000014	ENSSSCG00000017195	0.892489
ENSSSCG00000000014	ENSSSCG00000017260	0.771634
ENSSSCG00000000014	ENSSSCG00000017391	0.743152
ENSSSCG00000000014	ENSSSCG00000017414	0.761232
ENSSSCG00000000014	ENSSSCG00000017477	0.758043
ENSSSCG00000000014	ENSSSCG00000017518	0.743955
ENSSSCG00000000014	ENSSSCG00000017573	0.702918
ENSSSCG00000000014	ENSSSCG00000017885	0.800176
ENSSSCG00000000014	ENSSSCG00000021436	0.771314
ENSSSCG00000000014	ENSSSCG00000021638	0.830306
ENSSSCG00000000014	ENSSSCG00000022413	0.779272
ENSSSCG00000000014	ENSSSCG00000022687	0.821749
ENSSSCG00000000014	ENSSSCG00000022846	0.712837
ENSSSCG00000000014	ENSSSCG00000022933	0.76947
ENSSSCG00000000014	ENSSSCG00000023373	0.820858
ENSSSCG00000000014	ENSSSCG00000023714	0.79722
ENSSSCG00000000014	ENSSSCG00000024907	0.734425
ENSSSCG00000000014	ENSSSCG00000025448	0.77233
ENSSSCG00000000014	ENSSSCG00000025638	0.802217
ENSSSCG00000000014	ENSSSCG00000026446	0.880587
ENSSSCG00000000014	ENSSSCG00000026741	0.794538
ENSSSCG00000000014	ENSSSCG00000027251	0.724855
ENSSSCG00000000014	ENSSSCG00000029275	-0.711367
ENSSSCG00000000014	ENSSSCG00000029687	0.883238
ENSSSCG00000000014	ENSSSCG00000029711	0.755515
ENSSSCG00000000014	ENSSSCG00000030118	0.776036
ENSSSCG00000000014	ENSSSCG00000032043	0.888177
ENSSSCG00000000014	ENSSSCG00000032450	0.764461
ENSSSCG00000000014	ENSSSCG00000032835	0.780072
ENSSSCG00000000014	ENSSSCG00000033032	0.73088
ENSSSCG00000000014	ENSSSCG00000033196	0.730181
ENSSSCG00000000014	ENSSSCG00000034278	0.704859
ENSSSCG00000000014	ENSSSCG00000035518	0.704966
ENSSSCG00000000014	ENSSSCG00000036030	0.712482
ENSSSCG00000000014	ENSSSCG00000038038	0.703509
ENSSSCG00000000014	ENSSSCG00000038967	0.731925
ENSSSCG00000000014	ENSSSCG00000040559	0.762802
ENSSSCG00000000014	ENSSSCG00000040890	0.71485
ENSSSCG00000000014	ENSSSCG00000004138	-0.751474
ENSSSCG00000000014	ENSSSCG00000004332	-0.750207
ENSSSCG00000000014	ENSSSCG00000005385	-0.717801
ENSSSCG00000000014	ENSSSCG00000013397	0.735028
ENSSSCG00000000014	ENSSSCG00000015145	0.73463
ENSSSCG00000000014	ENSSSCG00000023653	0.870309
ENSSSCG00000000014	ENSSSCG00000026103	0.783103
ENSSSCG00000000014	ENSSSCG00000026161	0.797209
ENSSSCG00000000014	ENSSSCG00000028190	0.715798
ENSSSCG00000000014	ENSSSCG00000030165	-0.756475
ENSSSCG00000000014	ENSSSCG00000032566	0.800965
ENSSSCG00000000014	ENSSSCG00000034654	0.708072
ENSSSCG00000000014	ENSSSCG00000035537	-0.703745
ENSSSCG00000000014	ENSSSCG00000036340	0.738557
ENSSSCG00000000014	ENSSSCG00000037970	0.745743
ENSSSCG00000000063	ENSSSCG00000000695	0.708797
ENSSSCG00000000063	ENSSSCG00000001892	0.81042
ENSSSCG00000000063	ENSSSCG00000002281	0.722868
ENSSSCG00000000063	ENSSSCG00000002412	0.775277
ENSSSCG00000000063	ENSSSCG00000003369	0.858211
ENSSSCG00000000063	ENSSSCG00000003428	0.729774
ENSSSCG00000000063	ENSSSCG00000003549	0.72886
ENSSSCG00000000063	ENSSSCG00000003579	0.753799
ENSSSCG00000000063	ENSSSCG00000004954	0.793616
ENSSSCG00000000063	ENSSSCG00000005301	0.813621
ENSSSCG00000000063	ENSSSCG00000005303	0.709824
ENSSSCG00000000063	ENSSSCG00000005501	0.730226
ENSSSCG00000000063	ENSSSCG00000005648	0.798861
ENSSSCG00000000063	ENSSSCG00000005669	0.837178
ENSSSCG00000000063	ENSSSCG00000006698	0.75065
ENSSSCG00000000063	ENSSSCG00000006740	0.815443
ENSSSCG00000000063	ENSSSCG00000007317	0.821535
ENSSSCG00000000063	ENSSSCG00000007993	0.750655
ENSSSCG00000000063	ENSSSCG00000008132	0.71722
ENSSSCG00000000063	ENSSSCG00000009605	0.708488
ENSSSCG00000000063	ENSSSCG00000009755	0.707894
ENSSSCG00000000063	ENSSSCG00000010118	0.8883
ENSSSCG00000000063	ENSSSCG00000010330	0.830253
ENSSSCG00000000063	ENSSSCG00000010517	0.808559
ENSSSCG00000000063	ENSSSCG00000010537	0.752533
ENSSSCG00000000063	ENSSSCG00000010822	0.815301
ENSSSCG00000000063	ENSSSCG00000010992	0.71867
ENSSSCG00000000063	ENSSSCG00000011199	-0.717717
ENSSSCG00000000063	ENSSSCG00000011350	0.777056
ENSSSCG00000000063	ENSSSCG00000011379	0.713674
ENSSSCG00000000063	ENSSSCG00000011433	0.75386
ENSSSCG00000000063	ENSSSCG00000011604	0.720947
ENSSSCG00000000063	ENSSSCG00000011849	0.765262
ENSSSCG00000000063	ENSSSCG00000012361	0.819141
ENSSSCG00000000063	ENSSSCG00000012966	0.731621
ENSSSCG00000000063	ENSSSCG00000013178	0.848572
ENSSSCG00000000063	ENSSSCG00000014056	0.705737
ENSSSCG00000000063	ENSSSCG00000015242	0.778453
ENSSSCG00000000063	ENSSSCG00000015283	0.765816
ENSSSCG00000000063	ENSSSCG00000015613	0.750262
ENSSSCG00000000063	ENSSSCG00000016191	0.772946
ENSSSCG00000000063	ENSSSCG00000017214	0.723808
ENSSSCG00000000063	ENSSSCG00000017260	0.789387
ENSSSCG00000000063	ENSSSCG00000017414	0.81058
ENSSSCG00000000063	ENSSSCG00000017518	0.706778
ENSSSCG00000000063	ENSSSCG00000017528	0.791199
ENSSSCG00000000063	ENSSSCG00000017584	0.716577
ENSSSCG00000000063	ENSSSCG00000017885	0.829132
ENSSSCG00000000063	ENSSSCG00000021436	0.709758
ENSSSCG00000000063	ENSSSCG00000021638	0.746211
ENSSSCG00000000063	ENSSSCG00000022347	0.758483
ENSSSCG00000000063	ENSSSCG00000022687	0.789432
ENSSSCG00000000063	ENSSSCG00000022837	0.772719
ENSSSCG00000000063	ENSSSCG00000023373	0.719398
ENSSSCG00000000063	ENSSSCG00000024907	0.814947
ENSSSCG00000000063	ENSSSCG00000024954	0.743309
ENSSSCG00000000063	ENSSSCG00000025638	0.807691
ENSSSCG00000000063	ENSSSCG00000025943	0.806392
ENSSSCG00000000063	ENSSSCG00000026248	0.75093
ENSSSCG00000000063	ENSSSCG00000026446	0.782101
ENSSSCG00000000063	ENSSSCG00000026741	0.738611
ENSSSCG00000000063	ENSSSCG00000026784	0.759487
ENSSSCG00000000063	ENSSSCG00000028045	0.788884
ENSSSCG00000000063	ENSSSCG00000030118	0.768255
ENSSSCG00000000063	ENSSSCG00000031159	0.8143
ENSSSCG00000000063	ENSSSCG00000031420	0.720806
ENSSSCG00000000063	ENSSSCG00000032053	0.739273
ENSSSCG00000000063	ENSSSCG00000032366	0.820587
ENSSSCG00000000063	ENSSSCG00000032835	0.797666
ENSSSCG00000000063	ENSSSCG00000033196	0.774405
ENSSSCG00000000063	ENSSSCG00000034994	0.893467
ENSSSCG00000000063	ENSSSCG00000037912	0.774972
ENSSSCG00000000063	ENSSSCG00000038038	0.728532
ENSSSCG00000000063	ENSSSCG00000038967	0.843132
ENSSSCG00000000063	ENSSSCG00000039681	0.710139
ENSSSCG00000000063	ENSSSCG00000039867	0.73079
ENSSSCG00000000063	ENSSSCG00000040559	0.813911
ENSSSCG00000000063	ENSSSCG00000000702	0.733583
ENSSSCG00000000063	ENSSSCG00000004332	-0.709839
ENSSSCG00000000063	ENSSSCG00000008171	0.720929
ENSSSCG00000000063	ENSSSCG00000012287	0.765438
ENSSSCG00000000063	ENSSSCG00000013028	0.788907
ENSSSCG00000000063	ENSSSCG00000013501	0.752903
ENSSSCG00000000063	ENSSSCG00000017475	0.735733
ENSSSCG00000000063	ENSSSCG00000017950	0.720905
ENSSSCG00000000063	ENSSSCG00000023653	0.794735
ENSSSCG00000000063	ENSSSCG00000026103	0.872594
ENSSSCG00000000063	ENSSSCG00000026161	0.832478
ENSSSCG00000000063	ENSSSCG00000028190	0.781248
ENSSSCG00000000063	ENSSSCG00000036340	0.780771
ENSSSCG00000000063	ENSSSCG00000036933	0.707223
ENSSSCG00000000209	ENSSSCG00000000695	0.839637
ENSSSCG00000000209	ENSSSCG00000000741	0.715598
ENSSSCG00000000209	ENSSSCG00000001885	0.829181
ENSSSCG00000000209	ENSSSCG00000001892	0.809781
ENSSSCG00000000209	ENSSSCG00000002305	0.743695
ENSSSCG00000000209	ENSSSCG00000002392	0.837887
ENSSSCG00000000209	ENSSSCG00000002412	0.772596
ENSSSCG00000000209	ENSSSCG00000002806	0.865239
ENSSSCG00000000209	ENSSSCG00000002812	0.840199
ENSSSCG00000000209	ENSSSCG00000003369	0.746454
ENSSSCG00000000209	ENSSSCG00000003428	0.878752
ENSSSCG00000000209	ENSSSCG00000003549	0.719269
ENSSSCG00000000209	ENSSSCG00000004399	0.730001
ENSSSCG00000000209	ENSSSCG00000005501	0.886889
ENSSSCG00000000209	ENSSSCG00000005648	0.700922
ENSSSCG00000000209	ENSSSCG00000006290	-0.754398
ENSSSCG00000000209	ENSSSCG00000006340	-0.743223
ENSSSCG00000000209	ENSSSCG00000006698	0.81845
ENSSSCG00000000209	ENSSSCG00000006740	0.75065
ENSSSCG00000000209	ENSSSCG00000006893	0.76191
ENSSSCG00000000209	ENSSSCG00000007317	0.841178
ENSSSCG00000000209	ENSSSCG00000007350	0.712203
ENSSSCG00000000209	ENSSSCG00000007465	-0.741275
ENSSSCG00000000209	ENSSSCG00000007993	0.756498
ENSSSCG00000000209	ENSSSCG00000008162	-0.721094
ENSSSCG00000000209	ENSSSCG00000008349	0.869811
ENSSSCG00000000209	ENSSSCG00000009605	0.801586
ENSSSCG00000000209	ENSSSCG00000009807	0.705837
ENSSSCG00000000209	ENSSSCG00000010118	0.770989
ENSSSCG00000000209	ENSSSCG00000011199	-0.737794
ENSSSCG00000000209	ENSSSCG00000011350	0.726932
ENSSSCG00000000209	ENSSSCG00000011379	0.808026
ENSSSCG00000000209	ENSSSCG00000011401	0.837825
ENSSSCG00000000209	ENSSSCG00000011849	0.763885
ENSSSCG00000000209	ENSSSCG00000012241	0.807881
ENSSSCG00000000209	ENSSSCG00000012361	0.829617
ENSSSCG00000000209	ENSSSCG00000012941	0.811959
ENSSSCG00000000209	ENSSSCG00000012966	0.795364
ENSSSCG00000000209	ENSSSCG00000013110	0.8166
ENSSSCG00000000209	ENSSSCG00000013113	0.761476
ENSSSCG00000000209	ENSSSCG00000014168	-0.711904
ENSSSCG00000000209	ENSSSCG00000014875	0.913111
ENSSSCG00000000209	ENSSSCG00000015242	0.774958
ENSSSCG00000000209	ENSSSCG00000015283	0.845772
ENSSSCG00000000209	ENSSSCG00000015334	-0.790702
ENSSSCG00000000209	ENSSSCG00000016068	-0.735518
ENSSSCG00000000209	ENSSSCG00000016436	0.805697
ENSSSCG00000000209	ENSSSCG00000017195	0.724986
ENSSSCG00000000209	ENSSSCG00000017274	-0.723109
ENSSSCG00000000209	ENSSSCG00000017391	0.809113
ENSSSCG00000000209	ENSSSCG00000017414	0.817794
ENSSSCG00000000209	ENSSSCG00000017518	0.841752
ENSSSCG00000000209	ENSSSCG00000017573	0.865184
ENSSSCG00000000209	ENSSSCG00000017885	0.804252
ENSSSCG00000000209	ENSSSCG00000017986	-0.825531
ENSSSCG00000000209	ENSSSCG00000021436	0.733104
ENSSSCG00000000209	ENSSSCG00000021638	0.789012
ENSSSCG00000000209	ENSSSCG00000022687	0.79538
ENSSSCG00000000209	ENSSSCG00000022837	0.729944
ENSSSCG00000000209	ENSSSCG00000022933	0.712027
ENSSSCG00000000209	ENSSSCG00000023714	0.753591
ENSSSCG00000000209	ENSSSCG00000024596	-0.731536
ENSSSCG00000000209	ENSSSCG00000024960	-0.715605
ENSSSCG00000000209	ENSSSCG00000025240	-0.714366
ENSSSCG00000000209	ENSSSCG00000025647	0.801844
ENSSSCG00000000209	ENSSSCG00000025698	-0.749496
ENSSSCG00000000209	ENSSSCG00000025943	0.763493
ENSSSCG00000000209	ENSSSCG00000026196	-0.766059
ENSSSCG00000000209	ENSSSCG00000026741	0.787286
ENSSSCG00000000209	ENSSSCG00000027628	-0.716975
ENSSSCG00000000209	ENSSSCG00000027684	-0.715633
ENSSSCG00000000209	ENSSSCG00000028878	0.77829
ENSSSCG00000000209	ENSSSCG00000029275	-0.70572
ENSSSCG00000000209	ENSSSCG00000029711	0.724233
ENSSSCG00000000209	ENSSSCG00000029838	0.852758
ENSSSCG00000000209	ENSSSCG00000030268	-0.802881
ENSSSCG00000000209	ENSSSCG00000031420	0.714092
ENSSSCG00000000209	ENSSSCG00000031728	-0.776279
ENSSSCG00000000209	ENSSSCG00000032728	0.766265
ENSSSCG00000000209	ENSSSCG00000033196	0.769184
ENSSSCG00000000209	ENSSSCG00000035518	0.846496
ENSSSCG00000000209	ENSSSCG00000036030	0.861419
ENSSSCG00000000209	ENSSSCG00000037066	-0.732663
ENSSSCG00000000209	ENSSSCG00000037292	0.782023
ENSSSCG00000000209	ENSSSCG00000037520	0.707372
ENSSSCG00000000209	ENSSSCG00000038038	0.829849
ENSSSCG00000000209	ENSSSCG00000038763	0.744045
ENSSSCG00000000209	ENSSSCG00000038967	0.739574
ENSSSCG00000000209	ENSSSCG00000040334	0.855142
ENSSSCG00000000209	ENSSSCG00000000258	0.702023
ENSSSCG00000000209	ENSSSCG00000001619	0.773707
ENSSSCG00000000209	ENSSSCG00000003264	0.734263
ENSSSCG00000000209	ENSSSCG00000003407	0.751216
ENSSSCG00000000209	ENSSSCG00000004332	-0.733479
ENSSSCG00000000209	ENSSSCG00000005385	-0.756205
ENSSSCG00000000209	ENSSSCG00000007958	0.782327
ENSSSCG00000000209	ENSSSCG00000009676	0.805577
ENSSSCG00000000209	ENSSSCG00000010219	-0.835208
ENSSSCG00000000209	ENSSSCG00000013375	0.710851
ENSSSCG00000000209	ENSSSCG00000013501	0.82673
ENSSSCG00000000209	ENSSSCG00000013873	0.790341
ENSSSCG00000000209	ENSSSCG00000015715	0.900889
ENSSSCG00000000209	ENSSSCG00000015982	0.750095
ENSSSCG00000000209	ENSSSCG00000017475	0.826905
ENSSSCG00000000209	ENSSSCG00000020801	0.732533
ENSSSCG00000000209	ENSSSCG00000023653	0.780148
ENSSSCG00000000209	ENSSSCG00000026103	0.786963
ENSSSCG00000000209	ENSSSCG00000027060	0.731618
ENSSSCG00000000209	ENSSSCG00000028606	0.720476
ENSSSCG00000000209	ENSSSCG00000031562	0.803024
ENSSSCG00000000209	ENSSSCG00000033613	0.735109
ENSSSCG00000000209	ENSSSCG00000035537	-0.755141
ENSSSCG00000000209	ENSSSCG00000036340	0.721943
ENSSSCG00000000209	ENSSSCG00000037970	0.764478
ENSSSCG00000000209	ENSSSCG00000040107	0.768052
ENSSSCG00000000419	ENSSSCG00000000971	0.700164
ENSSSCG00000000419	ENSSSCG00000007094	0.710189
ENSSSCG00000000419	ENSSSCG00000012875	0.713057
ENSSSCG00000000419	ENSSSCG00000013599	-0.776743
ENSSSCG00000000419	ENSSSCG00000014056	0.764415
ENSSSCG00000000419	ENSSSCG00000017134	0.734801
ENSSSCG00000000419	ENSSSCG00000022413	0.729657
ENSSSCG00000000419	ENSSSCG00000027251	0.723751
ENSSSCG00000000419	ENSSSCG00000032450	0.782766
ENSSSCG00000000419	ENSSSCG00000034262	0.71056
ENSSSCG00000000419	ENSSSCG00000036401	0.703249
ENSSSCG00000000419	ENSSSCG00000023653	0.710427
ENSSSCG00000000487	ENSSSCG00000000759	-0.713634
ENSSSCG00000000487	ENSSSCG00000002917	0.772997
ENSSSCG00000000487	ENSSSCG00000007094	0.769793
ENSSSCG00000000487	ENSSSCG00000008690	0.700039
ENSSSCG00000000487	ENSSSCG00000008881	0.742581
ENSSSCG00000000487	ENSSSCG00000009243	0.720283
ENSSSCG00000000487	ENSSSCG00000012315	0.770004
ENSSSCG00000000487	ENSSSCG00000014056	0.72723
ENSSSCG00000000487	ENSSSCG00000015589	0.758348
ENSSSCG00000000487	ENSSSCG00000022413	0.79536
ENSSSCG00000000487	ENSSSCG00000027251	0.77653
ENSSSCG00000000487	ENSSSCG00000032043	0.74
ENSSSCG00000000487	ENSSSCG00000033786	0.77197
ENSSSCG00000000487	ENSSSCG00000034262	0.726955
ENSSSCG00000000487	ENSSSCG00000035400	0.730212
ENSSSCG00000000487	ENSSSCG00000036401	0.830863
ENSSSCG00000000487	ENSSSCG00000037835	-0.703051
ENSSSCG00000000487	ENSSSCG00000002002	-0.705055
ENSSSCG00000000487	ENSSSCG00000004090	0.711905
ENSSSCG00000000487	ENSSSCG00000014915	0.824614
ENSSSCG00000000487	ENSSSCG00000040178	0.704614
ENSSSCG00000000499	ENSSSCG00000000645	0.776839
ENSSSCG00000000499	ENSSSCG00000009364	0.717772
ENSSSCG00000000499	ENSSSCG00000010626	0.722045
ENSSSCG00000000499	ENSSSCG00000014399	0.778604
ENSSSCG00000000499	ENSSSCG00000025021	0.713278
ENSSSCG00000000499	ENSSSCG00000027684	0.772807
ENSSSCG00000000499	ENSSSCG00000028572	0.715336
ENSSSCG00000000499	ENSSSCG00000029507	0.703554
ENSSSCG00000000499	ENSSSCG00000037201	0.721917
ENSSSCG00000000499	ENSSSCG00000038521	0.728725
ENSSSCG00000000499	ENSSSCG00000005589	0.715905
ENSSSCG00000000499	ENSSSCG00000009370	0.710182
ENSSSCG00000000499	ENSSSCG00000015595	0.703573
ENSSSCG00000000499	ENSSSCG00000026533	0.739968
ENSSSCG00000000499	ENSSSCG00000034207	0.712102
ENSSSCG00000000499	ENSSSCG00000036742	0.725485
ENSSSCG00000000499	ENSSSCG00000040751	0.780039
ENSSSCG00000000504	ENSSSCG00000000571	0.841668
ENSSSCG00000000504	ENSSSCG00000001892	-0.716239
ENSSSCG00000000504	ENSSSCG00000002252	0.751488
ENSSSCG00000000504	ENSSSCG00000002283	0.783597
ENSSSCG00000000504	ENSSSCG00000002315	0.71968
ENSSSCG00000000504	ENSSSCG00000003549	-0.708478
ENSSSCG00000000504	ENSSSCG00000004789	0.731529
ENSSSCG00000000504	ENSSSCG00000005288	0.715334
ENSSSCG00000000504	ENSSSCG00000005503	0.822948
ENSSSCG00000000504	ENSSSCG00000005648	-0.705251
ENSSSCG00000000504	ENSSSCG00000006231	0.85
ENSSSCG00000000504	ENSSSCG00000006290	0.826785
ENSSSCG00000000504	ENSSSCG00000006340	0.865723
ENSSSCG00000000504	ENSSSCG00000007034	0.70645
ENSSSCG00000000504	ENSSSCG00000007465	0.833596
ENSSSCG00000000504	ENSSSCG00000008162	0.850236
ENSSSCG00000000504	ENSSSCG00000008374	0.859166
ENSSSCG00000000504	ENSSSCG00000009029	0.708551
ENSSSCG00000000504	ENSSSCG00000009152	0.719073
ENSSSCG00000000504	ENSSSCG00000009464	0.830519
ENSSSCG00000000504	ENSSSCG00000009716	0.725413
ENSSSCG00000000504	ENSSSCG00000009927	-0.706275
ENSSSCG00000000504	ENSSSCG00000010210	0.77694
ENSSSCG00000000504	ENSSSCG00000010509	0.777083
ENSSSCG00000000504	ENSSSCG00000011075	0.701245
ENSSSCG00000000504	ENSSSCG00000011199	0.855338
ENSSSCG00000000504	ENSSSCG00000011379	-0.734146
ENSSSCG00000000504	ENSSSCG00000011496	0.93596
ENSSSCG00000000504	ENSSSCG00000012663	0.755526
ENSSSCG00000000504	ENSSSCG00000012966	-0.758958
ENSSSCG00000000504	ENSSSCG00000013110	-0.780119
ENSSSCG00000000504	ENSSSCG00000013113	-0.749002
ENSSSCG00000000504	ENSSSCG00000014132	0.776195
ENSSSCG00000000504	ENSSSCG00000014156	0.856247
ENSSSCG00000000504	ENSSSCG00000014168	0.839041
ENSSSCG00000000504	ENSSSCG00000014875	-0.766496
ENSSSCG00000000504	ENSSSCG00000015519	0.85879
ENSSSCG00000000504	ENSSSCG00000015613	-0.709606
ENSSSCG00000000504	ENSSSCG00000015774	0.7191
ENSSSCG00000000504	ENSSSCG00000015814	0.905289
ENSSSCG00000000504	ENSSSCG00000015872	0.805895
ENSSSCG00000000504	ENSSSCG00000016068	0.881801
ENSSSCG00000000504	ENSSSCG00000016606	0.783478
ENSSSCG00000000504	ENSSSCG00000016851	0.762449
ENSSSCG00000000504	ENSSSCG00000017137	-0.710579
ENSSSCG00000000504	ENSSSCG00000017274	0.846865
ENSSSCG00000000504	ENSSSCG00000017528	-0.709378
ENSSSCG00000000504	ENSSSCG00000017573	-0.710888
ENSSSCG00000000504	ENSSSCG00000017584	-0.745964
ENSSSCG00000000504	ENSSSCG00000017885	-0.712561
ENSSSCG00000000504	ENSSSCG00000023105	0.747812
ENSSSCG00000000504	ENSSSCG00000025194	0.771894
ENSSSCG00000000504	ENSSSCG00000025647	-0.724753
ENSSSCG00000000504	ENSSSCG00000025698	0.742457
ENSSSCG00000000504	ENSSSCG00000027105	0.784834
ENSSSCG00000000504	ENSSSCG00000027646	0.848534
ENSSSCG00000000504	ENSSSCG00000028117	0.719403
ENSSSCG00000000504	ENSSSCG00000028878	-0.762187
ENSSSCG00000000504	ENSSSCG00000029838	-0.702956
ENSSSCG00000000504	ENSSSCG00000031866	0.846297
ENSSSCG00000000504	ENSSSCG00000032094	0.705987
ENSSSCG00000000504	ENSSSCG00000032877	0.836669
ENSSSCG00000000504	ENSSSCG00000033146	0.799938
ENSSSCG00000000504	ENSSSCG00000033541	-0.753656
ENSSSCG00000000504	ENSSSCG00000036331	0.703065
ENSSSCG00000000504	ENSSSCG00000036723	0.755417
ENSSSCG00000000504	ENSSSCG00000037066	0.779724
ENSSSCG00000000504	ENSSSCG00000039998	0.793008
ENSSSCG00000000504	ENSSSCG00000040334	-0.81456
ENSSSCG00000000504	ENSSSCG00000040445	0.712927
ENSSSCG00000000504	ENSSSCG00000001619	-0.712934
ENSSSCG00000000504	ENSSSCG00000002769	-0.723459
ENSSSCG00000000504	ENSSSCG00000004127	0.71571
ENSSSCG00000000504	ENSSSCG00000004138	0.740477
ENSSSCG00000000504	ENSSSCG00000004332	0.713877
ENSSSCG00000000504	ENSSSCG00000004387	0.700278
ENSSSCG00000000504	ENSSSCG00000005096	0.705427
ENSSSCG00000000504	ENSSSCG00000006346	0.701167
ENSSSCG00000000504	ENSSSCG00000007311	0.728545
ENSSSCG00000000504	ENSSSCG00000007484	0.831718
ENSSSCG00000000504	ENSSSCG00000007767	-0.723854
ENSSSCG00000000504	ENSSSCG00000008334	0.728155
ENSSSCG00000000504	ENSSSCG00000008443	0.757059
ENSSSCG00000000504	ENSSSCG00000009440	0.750814
ENSSSCG00000000504	ENSSSCG00000009865	0.836435
ENSSSCG00000000504	ENSSSCG00000011125	0.762201
ENSSSCG00000000504	ENSSSCG00000011594	0.841376
ENSSSCG00000000504	ENSSSCG00000011810	0.788302
ENSSSCG00000000504	ENSSSCG00000011951	0.804515
ENSSSCG00000000504	ENSSSCG00000012029	0.741779
ENSSSCG00000000504	ENSSSCG00000012620	0.704946
ENSSSCG00000000504	ENSSSCG00000013501	-0.769628
ENSSSCG00000000504	ENSSSCG00000015235	0.839367
ENSSSCG00000000504	ENSSSCG00000015357	0.704994
ENSSSCG00000000504	ENSSSCG00000015715	-0.759936
ENSSSCG00000000504	ENSSSCG00000015982	-0.796061
ENSSSCG00000000504	ENSSSCG00000016057	0.822307
ENSSSCG00000000504	ENSSSCG00000017475	-0.708648
ENSSSCG00000000504	ENSSSCG00000017950	-0.718141
ENSSSCG00000000504	ENSSSCG00000021646	0.830837
ENSSSCG00000000504	ENSSSCG00000023803	0.701263
ENSSSCG00000000504	ENSSSCG00000024970	0.777181
ENSSSCG00000000504	ENSSSCG00000025777	0.719506
ENSSSCG00000000504	ENSSSCG00000027017	0.715549
ENSSSCG00000000504	ENSSSCG00000030095	0.775884
ENSSSCG00000000504	ENSSSCG00000032080	0.701853
ENSSSCG00000000504	ENSSSCG00000035212	0.836926
ENSSSCG00000000504	ENSSSCG00000037647	0.705975
ENSSSCG00000000504	ENSSSCG00000037762	-0.768588
ENSSSCG00000000571	ENSSSCG00000002252	0.824275
ENSSSCG00000000571	ENSSSCG00000002283	0.833547
ENSSSCG00000000571	ENSSSCG00000002315	0.777753
ENSSSCG00000000571	ENSSSCG00000004215	0.73283
ENSSSCG00000000571	ENSSSCG00000004347	0.758812
ENSSSCG00000000571	ENSSSCG00000005503	0.743501
ENSSSCG00000000571	ENSSSCG00000005648	-0.786399
ENSSSCG00000000571	ENSSSCG00000006231	0.87838
ENSSSCG00000000571	ENSSSCG00000006290	0.798406
ENSSSCG00000000571	ENSSSCG00000006340	0.833137
ENSSSCG00000000571	ENSSSCG00000007235	0.801383
ENSSSCG00000000571	ENSSSCG00000007465	0.820371
ENSSSCG00000000571	ENSSSCG00000008162	0.820737
ENSSSCG00000000571	ENSSSCG00000008374	0.777747
ENSSSCG00000000571	ENSSSCG00000009152	0.751158
ENSSSCG00000000571	ENSSSCG00000009464	0.843426
ENSSSCG00000000571	ENSSSCG00000009716	0.773345
ENSSSCG00000000571	ENSSSCG00000010210	0.811763
ENSSSCG00000000571	ENSSSCG00000010509	0.813398
ENSSSCG00000000571	ENSSSCG00000010529	-0.708278
ENSSSCG00000000571	ENSSSCG00000011199	0.814544
ENSSSCG00000000571	ENSSSCG00000011379	-0.74508
ENSSSCG00000000571	ENSSSCG00000011496	0.876755
ENSSSCG00000000571	ENSSSCG00000012663	0.927075
ENSSSCG00000000571	ENSSSCG00000012966	-0.814314
ENSSSCG00000000571	ENSSSCG00000013110	-0.807287
ENSSSCG00000000571	ENSSSCG00000013113	-0.700517
ENSSSCG00000000571	ENSSSCG00000014132	0.871289
ENSSSCG00000000571	ENSSSCG00000014156	0.871157
ENSSSCG00000000571	ENSSSCG00000014168	0.861483
ENSSSCG00000000571	ENSSSCG00000015037	0.758383
ENSSSCG00000000571	ENSSSCG00000015519	0.777212
ENSSSCG00000000571	ENSSSCG00000015659	0.709001
ENSSSCG00000000571	ENSSSCG00000015814	0.881955
ENSSSCG00000000571	ENSSSCG00000015872	0.788946
ENSSSCG00000000571	ENSSSCG00000016068	0.869807
ENSSSCG00000000571	ENSSSCG00000016606	0.782277
ENSSSCG00000000571	ENSSSCG00000016792	0.728342
ENSSSCG00000000571	ENSSSCG00000016851	0.710378
ENSSSCG00000000571	ENSSSCG00000017137	-0.734485
ENSSSCG00000000571	ENSSSCG00000017254	0.756998
ENSSSCG00000000571	ENSSSCG00000017274	0.841176
ENSSSCG00000000571	ENSSSCG00000017506	0.733978
ENSSSCG00000000571	ENSSSCG00000017528	-0.76129
ENSSSCG00000000571	ENSSSCG00000017573	-0.711124
ENSSSCG00000000571	ENSSSCG00000017584	-0.789568
ENSSSCG00000000571	ENSSSCG00000023105	0.749995
ENSSSCG00000000571	ENSSSCG00000023181	0.712845
ENSSSCG00000000571	ENSSSCG00000023806	0.810839
ENSSSCG00000000571	ENSSSCG00000024907	-0.709681
ENSSSCG00000000571	ENSSSCG00000025194	0.804137
ENSSSCG00000000571	ENSSSCG00000025647	-0.719036
ENSSSCG00000000571	ENSSSCG00000025943	-0.713275
ENSSSCG00000000571	ENSSSCG00000027105	0.923113
ENSSSCG00000000571	ENSSSCG00000027646	0.844037
ENSSSCG00000000571	ENSSSCG00000028045	-0.818801
ENSSSCG00000000571	ENSSSCG00000028878	-0.785965
ENSSSCG00000000571	ENSSSCG00000032094	0.785585
ENSSSCG00000000571	ENSSSCG00000032366	-0.799581
ENSSSCG00000000571	ENSSSCG00000032877	0.880546
ENSSSCG00000000571	ENSSSCG00000033146	0.780904
ENSSSCG00000000571	ENSSSCG00000033541	-0.739601
ENSSSCG00000000571	ENSSSCG00000036331	0.714765
ENSSSCG00000000571	ENSSSCG00000037066	0.749739
ENSSSCG00000000571	ENSSSCG00000038132	0.747223
ENSSSCG00000000571	ENSSSCG00000038423	0.821238
ENSSSCG00000000571	ENSSSCG00000038967	-0.719584
ENSSSCG00000000571	ENSSSCG00000039998	0.836952
ENSSSCG00000000571	ENSSSCG00000040334	-0.738776
ENSSSCG00000000571	ENSSSCG00000040445	0.81341
ENSSSCG00000000571	ENSSSCG00000000633	0.794309
ENSSSCG00000000571	ENSSSCG00000000902	0.852411
ENSSSCG00000000571	ENSSSCG00000001061	0.768379
ENSSSCG00000000571	ENSSSCG00000001474	-0.740727
ENSSSCG00000000571	ENSSSCG00000001708	0.778653
ENSSSCG00000000571	ENSSSCG00000002769	-0.755103
ENSSSCG00000000571	ENSSSCG00000003407	-0.726078
ENSSSCG00000000571	ENSSSCG00000004127	0.838411
ENSSSCG00000000571	ENSSSCG00000004138	0.768911
ENSSSCG00000000571	ENSSSCG00000004387	0.852219
ENSSSCG00000000571	ENSSSCG00000004505	0.711857
ENSSSCG00000000571	ENSSSCG00000004600	0.736586
ENSSSCG00000000571	ENSSSCG00000004739	0.789904
ENSSSCG00000000571	ENSSSCG00000004938	0.74177
ENSSSCG00000000571	ENSSSCG00000005096	0.804153
ENSSSCG00000000571	ENSSSCG00000006155	0.742548
ENSSSCG00000000571	ENSSSCG00000006346	0.842068
ENSSSCG00000000571	ENSSSCG00000006898	0.762171
ENSSSCG00000000571	ENSSSCG00000007311	0.80179
ENSSSCG00000000571	ENSSSCG00000007484	0.868972
ENSSSCG00000000571	ENSSSCG00000007767	-0.75565
ENSSSCG00000000571	ENSSSCG00000008099	0.780837
ENSSSCG00000000571	ENSSSCG00000009440	0.801223
ENSSSCG00000000571	ENSSSCG00000009865	0.76047
ENSSSCG00000000571	ENSSSCG00000011201	0.805853
ENSSSCG00000000571	ENSSSCG00000011594	0.75596
ENSSSCG00000000571	ENSSSCG00000011810	0.862579
ENSSSCG00000000571	ENSSSCG00000011951	0.882862
ENSSSCG00000000571	ENSSSCG00000012029	0.855173
ENSSSCG00000000571	ENSSSCG00000012608	0.73013
ENSSSCG00000000571	ENSSSCG00000012620	0.834172
ENSSSCG00000000571	ENSSSCG00000013501	-0.709364
ENSSSCG00000000571	ENSSSCG00000014319	0.743284
ENSSSCG00000000571	ENSSSCG00000014401	0.722249
ENSSSCG00000000571	ENSSSCG00000015235	0.910418
ENSSSCG00000000571	ENSSSCG00000015237	0.728294
ENSSSCG00000000571	ENSSSCG00000015357	0.797267
ENSSSCG00000000571	ENSSSCG00000015393	0.782653
ENSSSCG00000000571	ENSSSCG00000015568	0.837748
ENSSSCG00000000571	ENSSSCG00000015982	-0.799614
ENSSSCG00000000571	ENSSSCG00000015987	0.776316
ENSSSCG00000000571	ENSSSCG00000016057	0.906259
ENSSSCG00000000571	ENSSSCG00000016690	0.780381
ENSSSCG00000000571	ENSSSCG00000016703	0.736498
ENSSSCG00000000571	ENSSSCG00000017546	0.742305
ENSSSCG00000000571	ENSSSCG00000017604	0.879889
ENSSSCG00000000571	ENSSSCG00000017950	-0.779154
ENSSSCG00000000571	ENSSSCG00000020853	0.71096
ENSSSCG00000000571	ENSSSCG00000021204	0.737316
ENSSSCG00000000571	ENSSSCG00000021343	0.753799
ENSSSCG00000000571	ENSSSCG00000021646	0.938097
ENSSSCG00000000571	ENSSSCG00000022155	0.74323
ENSSSCG00000000571	ENSSSCG00000022318	0.812451
ENSSSCG00000000571	ENSSSCG00000023357	0.809631
ENSSSCG00000000571	ENSSSCG00000024253	0.708768
ENSSSCG00000000571	ENSSSCG00000024672	-0.716513
ENSSSCG00000000571	ENSSSCG00000024970	0.83581
ENSSSCG00000000571	ENSSSCG00000025777	0.887719
ENSSSCG00000000571	ENSSSCG00000026894	0.748413
ENSSSCG00000000571	ENSSSCG00000027017	0.848522
ENSSSCG00000000571	ENSSSCG00000027480	0.735441
ENSSSCG00000000571	ENSSSCG00000029920	0.740335
ENSSSCG00000000571	ENSSSCG00000029998	0.796774
ENSSSCG00000000571	ENSSSCG00000030095	0.773534
ENSSSCG00000000571	ENSSSCG00000032080	0.789683
ENSSSCG00000000571	ENSSSCG00000032372	0.788881
ENSSSCG00000000571	ENSSSCG00000034191	0.72948
ENSSSCG00000000571	ENSSSCG00000035212	0.939886
ENSSSCG00000000571	ENSSSCG00000035673	0.720638
ENSSSCG00000000571	ENSSSCG00000036033	0.71076
ENSSSCG00000000571	ENSSSCG00000036546	0.852139
ENSSSCG00000000571	ENSSSCG00000037558	0.70297
ENSSSCG00000000571	ENSSSCG00000037647	0.835366
ENSSSCG00000000571	ENSSSCG00000037762	-0.712128
ENSSSCG00000000571	ENSSSCG00000037766	0.766615
ENSSSCG00000000571	ENSSSCG00000038253	0.736163
ENSSSCG00000000571	ENSSSCG00000038443	0.793243
ENSSSCG00000000571	ENSSSCG00000040107	-0.712762
ENSSSCG00000000571	ENSSSCG00000040185	0.731168
ENSSSCG00000000571	ENSSSCG00000040959	0.758517
ENSSSCG00000000645	ENSSSCG00000002852	0.703762
ENSSSCG00000000645	ENSSSCG00000005981	0.757229
ENSSSCG00000000645	ENSSSCG00000006277	0.761764
ENSSSCG00000000645	ENSSSCG00000009814	0.721192
ENSSSCG00000000645	ENSSSCG00000010626	0.739325
ENSSSCG00000000645	ENSSSCG00000016134	0.71692
ENSSSCG00000000645	ENSSSCG00000027684	0.85576
ENSSSCG00000000645	ENSSSCG00000030268	0.718543
ENSSSCG00000000645	ENSSSCG00000035863	0.741912
ENSSSCG00000000645	ENSSSCG00000036223	0.714971
ENSSSCG00000000645	ENSSSCG00000037201	0.700341
ENSSSCG00000000645	ENSSSCG00000038594	0.714126
ENSSSCG00000000645	ENSSSCG00000038598	0.762501
ENSSSCG00000000645	ENSSSCG00000039348	0.792302
ENSSSCG00000000645	ENSSSCG00000039587	0.763565
ENSSSCG00000000645	ENSSSCG00000040412	0.742465
ENSSSCG00000000645	ENSSSCG00000005589	0.702623
ENSSSCG00000000645	ENSSSCG00000009370	0.794597
ENSSSCG00000000645	ENSSSCG00000026533	0.741393
ENSSSCG00000000645	ENSSSCG00000034207	0.812404
ENSSSCG00000000645	ENSSSCG00000036742	0.750246
ENSSSCG00000000645	ENSSSCG00000038643	0.721732
ENSSSCG00000000695	ENSSSCG00000001885	0.858957
ENSSSCG00000000695	ENSSSCG00000001892	0.803813
ENSSSCG00000000695	ENSSSCG00000002252	-0.721006
ENSSSCG00000000695	ENSSSCG00000002281	0.723685
ENSSSCG00000000695	ENSSSCG00000002392	0.70666
ENSSSCG00000000695	ENSSSCG00000002412	0.807789
ENSSSCG00000000695	ENSSSCG00000002812	0.836201
ENSSSCG00000000695	ENSSSCG00000003369	0.727064
ENSSSCG00000000695	ENSSSCG00000003428	0.826069
ENSSSCG00000000695	ENSSSCG00000003549	0.876994
ENSSSCG00000000695	ENSSSCG00000004954	0.795026
ENSSSCG00000000695	ENSSSCG00000005501	0.8175
ENSSSCG00000000695	ENSSSCG00000005648	0.758881
ENSSSCG00000000695	ENSSSCG00000005669	0.736329
ENSSSCG00000000695	ENSSSCG00000006290	-0.765362
ENSSSCG00000000695	ENSSSCG00000006340	-0.702617
ENSSSCG00000000695	ENSSSCG00000006698	0.797235
ENSSSCG00000000695	ENSSSCG00000007317	0.838954
ENSSSCG00000000695	ENSSSCG00000007465	-0.721742
ENSSSCG00000000695	ENSSSCG00000007993	0.758322
ENSSSCG00000000695	ENSSSCG00000008132	0.706054
ENSSSCG00000000695	ENSSSCG00000008349	0.762851
ENSSSCG00000000695	ENSSSCG00000009152	-0.716746
ENSSSCG00000000695	ENSSSCG00000009605	0.701107
ENSSSCG00000000695	ENSSSCG00000009672	0.71906
ENSSSCG00000000695	ENSSSCG00000010118	0.801102
ENSSSCG00000000695	ENSSSCG00000010330	0.704291
ENSSSCG00000000695	ENSSSCG00000010429	-0.764537
ENSSSCG00000000695	ENSSSCG00000010509	-0.712214
ENSSSCG00000000695	ENSSSCG00000010992	0.73232
ENSSSCG00000000695	ENSSSCG00000011199	-0.756567
ENSSSCG00000000695	ENSSSCG00000011350	0.877738
ENSSSCG00000000695	ENSSSCG00000011379	0.818827
ENSSSCG00000000695	ENSSSCG00000011401	0.801858
ENSSSCG00000000695	ENSSSCG00000011849	0.728831
ENSSSCG00000000695	ENSSSCG00000012361	0.806908
ENSSSCG00000000695	ENSSSCG00000012966	0.824906
ENSSSCG00000000695	ENSSSCG00000013110	0.829409
ENSSSCG00000000695	ENSSSCG00000013113	0.786065
ENSSSCG00000000695	ENSSSCG00000013178	0.70087
ENSSSCG00000000695	ENSSSCG00000014156	-0.704428
ENSSSCG00000000695	ENSSSCG00000014168	-0.848729
ENSSSCG00000000695	ENSSSCG00000014875	0.770784
ENSSSCG00000000695	ENSSSCG00000015242	0.827174
ENSSSCG00000000695	ENSSSCG00000015283	0.774402
ENSSSCG00000000695	ENSSSCG00000015334	-0.70573
ENSSSCG00000000695	ENSSSCG00000015613	0.784041
ENSSSCG00000000695	ENSSSCG00000015659	-0.795946
ENSSSCG00000000695	ENSSSCG00000015969	-0.785556
ENSSSCG00000000695	ENSSSCG00000016068	-0.760922
ENSSSCG00000000695	ENSSSCG00000016191	0.762237
ENSSSCG00000000695	ENSSSCG00000016436	0.744216
ENSSSCG00000000695	ENSSSCG00000017195	0.729451
ENSSSCG00000000695	ENSSSCG00000017260	0.782986
ENSSSCG00000000695	ENSSSCG00000017274	-0.726228
ENSSSCG00000000695	ENSSSCG00000017414	0.842325
ENSSSCG00000000695	ENSSSCG00000017518	0.738733
ENSSSCG00000000695	ENSSSCG00000017528	0.767688
ENSSSCG00000000695	ENSSSCG00000017573	0.821973
ENSSSCG00000000695	ENSSSCG00000017584	0.752799
ENSSSCG00000000695	ENSSSCG00000017885	0.840194
ENSSSCG00000000695	ENSSSCG00000021436	0.844076
ENSSSCG00000000695	ENSSSCG00000021638	0.707264
ENSSSCG00000000695	ENSSSCG00000022837	0.83531
ENSSSCG00000000695	ENSSSCG00000023714	0.73073
ENSSSCG00000000695	ENSSSCG00000024907	0.80195
ENSSSCG00000000695	ENSSSCG00000025194	-0.795016
ENSSSCG00000000695	ENSSSCG00000025647	0.846935
ENSSSCG00000000695	ENSSSCG00000025943	0.827556
ENSSSCG00000000695	ENSSSCG00000026741	0.7869
ENSSSCG00000000695	ENSSSCG00000027646	-0.724915
ENSSSCG00000000695	ENSSSCG00000028045	0.74171
ENSSSCG00000000695	ENSSSCG00000028878	0.750554
ENSSSCG00000000695	ENSSSCG00000029711	0.738796
ENSSSCG00000000695	ENSSSCG00000029838	0.71735
ENSSSCG00000000695	ENSSSCG00000030277	0.704935
ENSSSCG00000000695	ENSSSCG00000031420	0.732413
ENSSSCG00000000695	ENSSSCG00000032366	0.787071
ENSSSCG00000000695	ENSSSCG00000032728	0.725307
ENSSSCG00000000695	ENSSSCG00000033541	0.815575
ENSSSCG00000000695	ENSSSCG00000034494	0.704452
ENSSSCG00000000695	ENSSSCG00000035518	0.747864
ENSSSCG00000000695	ENSSSCG00000037520	0.727687
ENSSSCG00000000695	ENSSSCG00000037912	0.752482
ENSSSCG00000000695	ENSSSCG00000038038	0.7242
ENSSSCG00000000695	ENSSSCG00000038967	0.76255
ENSSSCG00000000695	ENSSSCG00000040334	0.815621
ENSSSCG00000000695	ENSSSCG00000040445	-0.754271
ENSSSCG00000000695	ENSSSCG00000040559	0.723242
ENSSSCG00000000695	ENSSSCG00000000084	0.708284
ENSSSCG00000000695	ENSSSCG00000000702	0.817789
ENSSSCG00000000695	ENSSSCG00000001474	0.760144
ENSSSCG00000000695	ENSSSCG00000001619	0.843316
ENSSSCG00000000695	ENSSSCG00000002769	0.802121
ENSSSCG00000000695	ENSSSCG00000002885	0.714458
ENSSSCG00000000695	ENSSSCG00000003264	0.802459
ENSSSCG00000000695	ENSSSCG00000003407	0.857171
ENSSSCG00000000695	ENSSSCG00000003976	0.734408
ENSSSCG00000000695	ENSSSCG00000007559	0.777842
ENSSSCG00000000695	ENSSSCG00000007767	0.703214
ENSSSCG00000000695	ENSSSCG00000007958	0.833938
ENSSSCG00000000695	ENSSSCG00000008553	0.727618
ENSSSCG00000000695	ENSSSCG00000009676	0.72018
ENSSSCG00000000695	ENSSSCG00000010219	-0.76411
ENSSSCG00000000695	ENSSSCG00000012287	0.716196
ENSSSCG00000000695	ENSSSCG00000012981	0.707924
ENSSSCG00000000695	ENSSSCG00000013028	0.710623
ENSSSCG00000000695	ENSSSCG00000013501	0.844241
ENSSSCG00000000695	ENSSSCG00000013873	0.783204
ENSSSCG00000000695	ENSSSCG00000015112	0.773195
ENSSSCG00000000695	ENSSSCG00000015715	0.802893
ENSSSCG00000000695	ENSSSCG00000015982	0.810599
ENSSSCG00000000695	ENSSSCG00000017125	0.749481
ENSSSCG00000000695	ENSSSCG00000017475	0.769556
ENSSSCG00000000695	ENSSSCG00000017516	0.722812
ENSSSCG00000000695	ENSSSCG00000017950	0.750887
ENSSSCG00000000695	ENSSSCG00000023653	0.715965
ENSSSCG00000000695	ENSSSCG00000026103	0.873257
ENSSSCG00000000695	ENSSSCG00000027060	0.757227
ENSSSCG00000000695	ENSSSCG00000031562	0.795536
ENSSSCG00000000695	ENSSSCG00000034654	0.711218
ENSSSCG00000000695	ENSSSCG00000035101	-0.805888
ENSSSCG00000000695	ENSSSCG00000036340	0.800371
ENSSSCG00000000695	ENSSSCG00000036933	0.717351
ENSSSCG00000000695	ENSSSCG00000037762	0.73997
ENSSSCG00000000695	ENSSSCG00000038313	0.742636
ENSSSCG00000000695	ENSSSCG00000040107	0.857347
ENSSSCG00000000741	ENSSSCG00000003428	0.716598
ENSSSCG00000000741	ENSSSCG00000010529	0.796061
ENSSSCG00000000741	ENSSSCG00000011199	-0.741057
ENSSSCG00000000741	ENSSSCG00000011379	0.707849
ENSSSCG00000000741	ENSSSCG00000012966	0.730848
ENSSSCG00000000741	ENSSSCG00000013110	0.729153
ENSSSCG00000000741	ENSSSCG00000013292	0.719641
ENSSSCG00000000741	ENSSSCG00000014875	0.791681
ENSSSCG00000000741	ENSSSCG00000017137	0.704377
ENSSSCG00000000741	ENSSSCG00000017414	0.707892
ENSSSCG00000000741	ENSSSCG00000017573	0.749775
ENSSSCG00000000741	ENSSSCG00000028878	0.721701
ENSSSCG00000000741	ENSSSCG00000029838	0.71927
ENSSSCG00000000741	ENSSSCG00000032877	-0.702053
ENSSSCG00000000741	ENSSSCG00000038967	0.757581
ENSSSCG00000000741	ENSSSCG00000040334	0.722994
ENSSSCG00000000741	ENSSSCG00000001619	0.736654
ENSSSCG00000000741	ENSSSCG00000013501	0.760082
ENSSSCG00000000741	ENSSSCG00000013873	0.737181
ENSSSCG00000000741	ENSSSCG00000017475	0.717268
ENSSSCG00000000741	ENSSSCG00000026103	0.710908
ENSSSCG00000000741	ENSSSCG00000028606	0.761525
ENSSSCG00000000759	ENSSSCG00000001471	0.733798
ENSSSCG00000000759	ENSSSCG00000001723	-0.747324
ENSSSCG00000000759	ENSSSCG00000002852	0.728525
ENSSSCG00000000759	ENSSSCG00000002917	-0.734291
ENSSSCG00000000759	ENSSSCG00000004918	0.720034
ENSSSCG00000000759	ENSSSCG00000007094	-0.701042
ENSSSCG00000000759	ENSSSCG00000009814	0.81833
ENSSSCG00000000759	ENSSSCG00000010456	-0.752886
ENSSSCG00000000759	ENSSSCG00000010626	0.720866
ENSSSCG00000000759	ENSSSCG00000011076	0.707142
ENSSSCG00000000759	ENSSSCG00000011646	0.928596
ENSSSCG00000000759	ENSSSCG00000012315	-0.739471
ENSSSCG00000000759	ENSSSCG00000012875	-0.718665
ENSSSCG00000000759	ENSSSCG00000015589	-0.710533
ENSSSCG00000000759	ENSSSCG00000016462	0.892623
ENSSSCG00000000759	ENSSSCG00000017366	0.747232
ENSSSCG00000000759	ENSSSCG00000017682	-0.708851
ENSSSCG00000000759	ENSSSCG00000022413	-0.729454
ENSSSCG00000000759	ENSSSCG00000026724	0.814858
ENSSSCG00000000759	ENSSSCG00000029226	0.787146
ENSSSCG00000000759	ENSSSCG00000029507	0.781193
ENSSSCG00000000759	ENSSSCG00000032115	0.740706
ENSSSCG00000000759	ENSSSCG00000033489	0.805432
ENSSSCG00000000759	ENSSSCG00000033786	-0.732488
ENSSSCG00000000759	ENSSSCG00000033822	-0.710715
ENSSSCG00000000759	ENSSSCG00000036223	0.73573
ENSSSCG00000000759	ENSSSCG00000036401	-0.71162
ENSSSCG00000000759	ENSSSCG00000037835	0.891933
ENSSSCG00000000759	ENSSSCG00000038727	0.707198
ENSSSCG00000000759	ENSSSCG00000039348	0.710947
ENSSSCG00000000759	ENSSSCG00000040412	0.730593
ENSSSCG00000000759	ENSSSCG00000002002	0.778669
ENSSSCG00000000759	ENSSSCG00000003148	0.73207
ENSSSCG00000000759	ENSSSCG00000004856	0.718606
ENSSSCG00000000759	ENSSSCG00000005589	0.70136
ENSSSCG00000000759	ENSSSCG00000010027	0.72777
ENSSSCG00000000759	ENSSSCG00000014915	-0.722777
ENSSSCG00000000759	ENSSSCG00000021586	0.789502
ENSSSCG00000000759	ENSSSCG00000023660	0.75057
ENSSSCG00000000759	ENSSSCG00000031321	0.793877
ENSSSCG00000000759	ENSSSCG00000034297	0.704205
ENSSSCG00000000759	ENSSSCG00000035152	0.792859
ENSSSCG00000000759	ENSSSCG00000036742	0.723529
ENSSSCG00000000958	ENSSSCG00000004154	0.704256
ENSSSCG00000000958	ENSSSCG00000012241	0.862508
ENSSSCG00000000958	ENSSSCG00000034708	0.7252
ENSSSCG00000000971	ENSSSCG00000007993	0.700592
ENSSSCG00000000971	ENSSSCG00000011076	-0.780867
ENSSSCG00000000971	ENSSSCG00000012875	0.72933
ENSSSCG00000000971	ENSSSCG00000015334	-0.712066
ENSSSCG00000000971	ENSSSCG00000017134	0.729613
ENSSSCG00000000971	ENSSSCG00000017518	0.776422
ENSSSCG00000000971	ENSSSCG00000017986	-0.707718
ENSSSCG00000000971	ENSSSCG00000022413	0.748948
ENSSSCG00000000971	ENSSSCG00000028056	-0.760006
ENSSSCG00000000971	ENSSSCG00000028322	-0.846979
ENSSSCG00000000971	ENSSSCG00000030118	0.727966
ENSSSCG00000000971	ENSSSCG00000031262	-0.778787
ENSSSCG00000000971	ENSSSCG00000031728	-0.704113
ENSSSCG00000000971	ENSSSCG00000035774	-0.702683
ENSSSCG00000000971	ENSSSCG00000038500	-0.774863
ENSSSCG00000000971	ENSSSCG00000039419	-0.729287
ENSSSCG00000000971	ENSSSCG00000002383	-0.705096
ENSSSCG00000000971	ENSSSCG00000008171	0.729348
ENSSSCG00000000971	ENSSSCG00000009676	0.770758
ENSSSCG00000000971	ENSSSCG00000015595	-0.711687
ENSSSCG00000000971	ENSSSCG00000015985	0.708449
ENSSSCG00000000971	ENSSSCG00000023653	0.77995
ENSSSCG00000000971	ENSSSCG00000026533	-0.724905
ENSSSCG00000001137	ENSSSCG00000004980	0.729227
ENSSSCG00000001137	ENSSSCG00000006277	0.756731
ENSSSCG00000001137	ENSSSCG00000009807	-0.709853
ENSSSCG00000001137	ENSSSCG00000010626	0.711481
ENSSSCG00000001137	ENSSSCG00000015774	0.717863
ENSSSCG00000001137	ENSSSCG00000039348	0.742099
ENSSSCG00000001137	ENSSSCG00000039587	0.788128
ENSSSCG00000001137	ENSSSCG00000004332	0.726944
ENSSSCG00000001137	ENSSSCG00000009370	0.716847
ENSSSCG00000001471	ENSSSCG00000001921	0.729571
ENSSSCG00000001471	ENSSSCG00000001988	0.726618
ENSSSCG00000001471	ENSSSCG00000003558	0.766163
ENSSSCG00000001471	ENSSSCG00000003805	0.703476
ENSSSCG00000001471	ENSSSCG00000005288	0.737686
ENSSSCG00000001471	ENSSSCG00000005631	0.793228
ENSSSCG00000001471	ENSSSCG00000009029	0.720044
ENSSSCG00000001471	ENSSSCG00000009364	0.741711
ENSSSCG00000001471	ENSSSCG00000009801	-0.712815
ENSSSCG00000001471	ENSSSCG00000010329	0.742908
ENSSSCG00000001471	ENSSSCG00000010464	0.763382
ENSSSCG00000001471	ENSSSCG00000010626	0.780259
ENSSSCG00000001471	ENSSSCG00000011076	0.808534
ENSSSCG00000001471	ENSSSCG00000011499	0.853367
ENSSSCG00000001471	ENSSSCG00000011641	0.746541
ENSSSCG00000001471	ENSSSCG00000011646	0.82942
ENSSSCG00000001471	ENSSSCG00000011670	-0.710259
ENSSSCG00000001471	ENSSSCG00000012875	-0.705108
ENSSSCG00000001471	ENSSSCG00000016338	0.726355
ENSSSCG00000001471	ENSSSCG00000016462	0.745584
ENSSSCG00000001471	ENSSSCG00000017986	0.73702
ENSSSCG00000001471	ENSSSCG00000022256	0.72425
ENSSSCG00000001471	ENSSSCG00000022413	-0.705869
ENSSSCG00000001471	ENSSSCG00000027684	0.749556
ENSSSCG00000001471	ENSSSCG00000028056	0.708041
ENSSSCG00000001471	ENSSSCG00000028322	0.790224
ENSSSCG00000001471	ENSSSCG00000029226	0.799859
ENSSSCG00000001471	ENSSSCG00000029507	0.861485
ENSSSCG00000001471	ENSSSCG00000030303	0.7243
ENSSSCG00000001471	ENSSSCG00000031728	0.748207
ENSSSCG00000001471	ENSSSCG00000032115	0.713049
ENSSSCG00000001471	ENSSSCG00000034262	-0.710862
ENSSSCG00000001471	ENSSSCG00000035400	-0.71466
ENSSSCG00000001471	ENSSSCG00000035774	0.843142
ENSSSCG00000001471	ENSSSCG00000035940	0.721941
ENSSSCG00000001471	ENSSSCG00000036223	0.759845
ENSSSCG00000001471	ENSSSCG00000037835	0.737532
ENSSSCG00000001471	ENSSSCG00000039419	0.74643
ENSSSCG00000001471	ENSSSCG00000039986	0.746619
ENSSSCG00000001471	ENSSSCG00000040412	0.727039
ENSSSCG00000001471	ENSSSCG00000003148	0.718272
ENSSSCG00000001471	ENSSSCG00000004856	0.769023
ENSSSCG00000001471	ENSSSCG00000005589	0.764482
ENSSSCG00000001471	ENSSSCG00000005965	0.722142
ENSSSCG00000001471	ENSSSCG00000015595	0.823913
ENSSSCG00000001471	ENSSSCG00000017251	0.783711
ENSSSCG00000001471	ENSSSCG00000021586	0.74906
ENSSSCG00000001471	ENSSSCG00000026533	0.759693
ENSSSCG00000001471	ENSSSCG00000030165	0.815775
ENSSSCG00000001471	ENSSSCG00000031321	0.728727
ENSSSCG00000001471	ENSSSCG00000035152	0.792311
ENSSSCG00000001471	ENSSSCG00000035537	0.70207
ENSSSCG00000001471	ENSSSCG00000036136	0.740845
ENSSSCG00000001471	ENSSSCG00000036742	0.726764
ENSSSCG00000001471	ENSSSCG00000040751	0.76523
ENSSSCG00000001723	ENSSSCG00000002852	-0.703304
ENSSSCG00000001723	ENSSSCG00000002917	0.809915
ENSSSCG00000001723	ENSSSCG00000005449	0.791313
ENSSSCG00000001723	ENSSSCG00000007094	0.820416
ENSSSCG00000001723	ENSSSCG00000009243	0.866008
ENSSSCG00000001723	ENSSSCG00000009814	-0.835898
ENSSSCG00000001723	ENSSSCG00000010329	-0.712595
ENSSSCG00000001723	ENSSSCG00000010456	0.84943
ENSSSCG00000001723	ENSSSCG00000010822	0.781497
ENSSSCG00000001723	ENSSSCG00000011133	-0.803183
ENSSSCG00000001723	ENSSSCG00000011433	0.774614
ENSSSCG00000001723	ENSSSCG00000011604	0.708244
ENSSSCG00000001723	ENSSSCG00000011646	-0.787504
ENSSSCG00000001723	ENSSSCG00000011670	0.70177
ENSSSCG00000001723	ENSSSCG00000012315	0.800316
ENSSSCG00000001723	ENSSSCG00000012875	0.732236
ENSSSCG00000001723	ENSSSCG00000014056	0.772018
ENSSSCG00000001723	ENSSSCG00000015589	0.703797
ENSSSCG00000001723	ENSSSCG00000016338	-0.737812
ENSSSCG00000001723	ENSSSCG00000016462	-0.782956
ENSSSCG00000001723	ENSSSCG00000017366	-0.736581
ENSSSCG00000001723	ENSSSCG00000017477	0.825941
ENSSSCG00000001723	ENSSSCG00000017682	0.882176
ENSSSCG00000001723	ENSSSCG00000021638	0.742947
ENSSSCG00000001723	ENSSSCG00000022256	-0.76718
ENSSSCG00000001723	ENSSSCG00000022413	0.703965
ENSSSCG00000001723	ENSSSCG00000023373	0.758742
ENSSSCG00000001723	ENSSSCG00000024219	0.823618
ENSSSCG00000001723	ENSSSCG00000024954	0.829171
ENSSSCG00000001723	ENSSSCG00000026446	0.831251
ENSSSCG00000001723	ENSSSCG00000026724	-0.792045
ENSSSCG00000001723	ENSSSCG00000027251	0.787094
ENSSSCG00000001723	ENSSSCG00000030118	0.70718
ENSSSCG00000001723	ENSSSCG00000032043	0.798509
ENSSSCG00000001723	ENSSSCG00000032053	0.70056
ENSSSCG00000001723	ENSSSCG00000032835	0.774431
ENSSSCG00000001723	ENSSSCG00000033032	0.782277
ENSSSCG00000001723	ENSSSCG00000033489	-0.713248
ENSSSCG00000001723	ENSSSCG00000033786	0.75626
ENSSSCG00000001723	ENSSSCG00000034278	0.783561
ENSSSCG00000001723	ENSSSCG00000035400	0.809006
ENSSSCG00000001723	ENSSSCG00000036223	-0.784275
ENSSSCG00000001723	ENSSSCG00000036401	0.741513
ENSSSCG00000001723	ENSSSCG00000038500	-0.773762
ENSSSCG00000001723	ENSSSCG00000038598	-0.746057
ENSSSCG00000001723	ENSSSCG00000039348	-0.757164
ENSSSCG00000001723	ENSSSCG00000039419	-0.700727
ENSSSCG00000001723	ENSSSCG00000040412	-0.820794
ENSSSCG00000001723	ENSSSCG00000003148	-0.735324
ENSSSCG00000001723	ENSSSCG00000005233	0.775305
ENSSSCG00000001723	ENSSSCG00000005589	-0.789704
ENSSSCG00000001723	ENSSSCG00000013397	0.823158
ENSSSCG00000001723	ENSSSCG00000014915	0.80382
ENSSSCG00000001723	ENSSSCG00000021586	-0.754278
ENSSSCG00000001723	ENSSSCG00000030165	-0.704619
ENSSSCG00000001723	ENSSSCG00000032367	-0.722966
ENSSSCG00000001723	ENSSSCG00000034207	-0.709601
ENSSSCG00000001723	ENSSSCG00000034708	0.713518
ENSSSCG00000001844	ENSSSCG00000002993	0.83459
ENSSSCG00000001844	ENSSSCG00000003590	0.860491
ENSSSCG00000001844	ENSSSCG00000009029	-0.794211
ENSSSCG00000001844	ENSSSCG00000010529	0.844877
ENSSSCG00000001844	ENSSSCG00000010554	0.784258
ENSSSCG00000001844	ENSSSCG00000012844	0.836713
ENSSSCG00000001844	ENSSSCG00000013056	0.942174
ENSSSCG00000001844	ENSSSCG00000013292	0.772491
ENSSSCG00000001844	ENSSSCG00000013667	0.792724
ENSSSCG00000001844	ENSSSCG00000015270	0.739181
ENSSSCG00000001844	ENSSSCG00000017498	0.858875
ENSSSCG00000001844	ENSSSCG00000017759	0.923196
ENSSSCG00000001844	ENSSSCG00000017801	0.91493
ENSSSCG00000001844	ENSSSCG00000021386	0.747255
ENSSSCG00000001844	ENSSSCG00000021408	0.886582
ENSSSCG00000001844	ENSSSCG00000024644	0.85518
ENSSSCG00000001844	ENSSSCG00000025822	0.891659
ENSSSCG00000001844	ENSSSCG00000027952	0.807021
ENSSSCG00000001844	ENSSSCG00000029944	0.877384
ENSSSCG00000001844	ENSSSCG00000030626	0.902094
ENSSSCG00000001844	ENSSSCG00000032728	0.722385
ENSSSCG00000001844	ENSSSCG00000033822	0.773327
ENSSSCG00000001844	ENSSSCG00000034102	0.908988
ENSSSCG00000001844	ENSSSCG00000040464	0.828069
ENSSSCG00000001844	ENSSSCG00000007710	0.749362
ENSSSCG00000001844	ENSSSCG00000011579	0.727629
ENSSSCG00000001885	ENSSSCG00000001892	0.782382
ENSSSCG00000001885	ENSSSCG00000002252	-0.739265
ENSSSCG00000001885	ENSSSCG00000002281	0.759922
ENSSSCG00000001885	ENSSSCG00000002392	0.735048
ENSSSCG00000001885	ENSSSCG00000002412	0.797286
ENSSSCG00000001885	ENSSSCG00000002806	0.758317
ENSSSCG00000001885	ENSSSCG00000002812	0.821511
ENSSSCG00000001885	ENSSSCG00000003369	0.750663
ENSSSCG00000001885	ENSSSCG00000003428	0.796852
ENSSSCG00000001885	ENSSSCG00000003549	0.797741
ENSSSCG00000001885	ENSSSCG00000005501	0.81328
ENSSSCG00000001885	ENSSSCG00000005648	0.753404
ENSSSCG00000001885	ENSSSCG00000006290	-0.795175
ENSSSCG00000001885	ENSSSCG00000006340	-0.768392
ENSSSCG00000001885	ENSSSCG00000006698	0.845369
ENSSSCG00000001885	ENSSSCG00000007317	0.860897
ENSSSCG00000001885	ENSSSCG00000007465	-0.774522
ENSSSCG00000001885	ENSSSCG00000008132	0.70485
ENSSSCG00000001885	ENSSSCG00000008162	-0.713574
ENSSSCG00000001885	ENSSSCG00000008349	0.764691
ENSSSCG00000001885	ENSSSCG00000010118	0.77345
ENSSSCG00000001885	ENSSSCG00000010429	-0.719832
ENSSSCG00000001885	ENSSSCG00000011199	-0.748536
ENSSSCG00000001885	ENSSSCG00000011350	0.752702
ENSSSCG00000001885	ENSSSCG00000011379	0.865379
ENSSSCG00000001885	ENSSSCG00000011401	0.864364
ENSSSCG00000001885	ENSSSCG00000012361	0.754225
ENSSSCG00000001885	ENSSSCG00000012966	0.898808
ENSSSCG00000001885	ENSSSCG00000013110	0.901737
ENSSSCG00000001885	ENSSSCG00000013113	0.821372
ENSSSCG00000001885	ENSSSCG00000013178	0.700156
ENSSSCG00000001885	ENSSSCG00000014132	-0.721296
ENSSSCG00000001885	ENSSSCG00000014168	-0.797915
ENSSSCG00000001885	ENSSSCG00000014875	0.797587
ENSSSCG00000001885	ENSSSCG00000015242	0.829759
ENSSSCG00000001885	ENSSSCG00000015283	0.703139
ENSSSCG00000001885	ENSSSCG00000015613	0.742646
ENSSSCG00000001885	ENSSSCG00000015659	-0.850117
ENSSSCG00000001885	ENSSSCG00000016068	-0.77218
ENSSSCG00000001885	ENSSSCG00000016191	0.741944
ENSSSCG00000001885	ENSSSCG00000017274	-0.78207
ENSSSCG00000001885	ENSSSCG00000017414	0.777003
ENSSSCG00000001885	ENSSSCG00000017528	0.744731
ENSSSCG00000001885	ENSSSCG00000017573	0.846974
ENSSSCG00000001885	ENSSSCG00000017584	0.798502
ENSSSCG00000001885	ENSSSCG00000017885	0.757887
ENSSSCG00000001885	ENSSSCG00000021436	0.704709
ENSSSCG00000001885	ENSSSCG00000022837	0.776233
ENSSSCG00000001885	ENSSSCG00000024907	0.716802
ENSSSCG00000001885	ENSSSCG00000025647	0.795398
ENSSSCG00000001885	ENSSSCG00000025943	0.814461
ENSSSCG00000001885	ENSSSCG00000026741	0.748862
ENSSSCG00000001885	ENSSSCG00000027105	-0.730522
ENSSSCG00000001885	ENSSSCG00000027646	-0.713249
ENSSSCG00000001885	ENSSSCG00000028045	0.761283
ENSSSCG00000001885	ENSSSCG00000028878	0.796603
ENSSSCG00000001885	ENSSSCG00000029838	0.787163
ENSSSCG00000001885	ENSSSCG00000031420	0.719881
ENSSSCG00000001885	ENSSSCG00000032366	0.780392
ENSSSCG00000001885	ENSSSCG00000032728	0.713242
ENSSSCG00000001885	ENSSSCG00000033196	0.703653
ENSSSCG00000001885	ENSSSCG00000033541	0.750946
ENSSSCG00000001885	ENSSSCG00000035518	0.747096
ENSSSCG00000001885	ENSSSCG00000037066	-0.709722
ENSSSCG00000001885	ENSSSCG00000037292	0.718051
ENSSSCG00000001885	ENSSSCG00000037520	0.745682
ENSSSCG00000001885	ENSSSCG00000038038	0.767989
ENSSSCG00000001885	ENSSSCG00000038967	0.743052
ENSSSCG00000001885	ENSSSCG00000039998	-0.809768
ENSSSCG00000001885	ENSSSCG00000040334	0.794563
ENSSSCG00000001885	ENSSSCG00000040445	-0.771065
ENSSSCG00000001885	ENSSSCG00000000258	0.800996
ENSSSCG00000001885	ENSSSCG00000000702	0.74768
ENSSSCG00000001885	ENSSSCG00000001474	0.797966
ENSSSCG00000001885	ENSSSCG00000001619	0.824692
ENSSSCG00000001885	ENSSSCG00000001661	0.731749
ENSSSCG00000001885	ENSSSCG00000002741	0.748198
ENSSSCG00000001885	ENSSSCG00000002769	0.827637
ENSSSCG00000001885	ENSSSCG00000002885	0.760541
ENSSSCG00000001885	ENSSSCG00000003030	0.711487
ENSSSCG00000001885	ENSSSCG00000003211	0.723956
ENSSSCG00000001885	ENSSSCG00000003407	0.799195
ENSSSCG00000001885	ENSSSCG00000003976	0.768381
ENSSSCG00000001885	ENSSSCG00000005917	0.849165
ENSSSCG00000001885	ENSSSCG00000006468	0.800347
ENSSSCG00000001885	ENSSSCG00000007559	0.775351
ENSSSCG00000001885	ENSSSCG00000007958	0.773025
ENSSSCG00000001885	ENSSSCG00000008553	0.806344
ENSSSCG00000001885	ENSSSCG00000008687	0.709402
ENSSSCG00000001885	ENSSSCG00000012287	0.822351
ENSSSCG00000001885	ENSSSCG00000012981	0.733577
ENSSSCG00000001885	ENSSSCG00000013437	0.714652
ENSSSCG00000001885	ENSSSCG00000013501	0.75697
ENSSSCG00000001885	ENSSSCG00000013873	0.884451
ENSSSCG00000001885	ENSSSCG00000015715	0.837764
ENSSSCG00000001885	ENSSSCG00000015982	0.866192
ENSSSCG00000001885	ENSSSCG00000017125	0.734444
ENSSSCG00000001885	ENSSSCG00000017475	0.821861
ENSSSCG00000001885	ENSSSCG00000017516	0.747144
ENSSSCG00000001885	ENSSSCG00000017950	0.777666
ENSSSCG00000001885	ENSSSCG00000022728	0.717537
ENSSSCG00000001885	ENSSSCG00000024672	0.799527
ENSSSCG00000001885	ENSSSCG00000025321	0.809244
ENSSSCG00000001885	ENSSSCG00000026103	0.785168
ENSSSCG00000001885	ENSSSCG00000027060	0.797806
ENSSSCG00000001885	ENSSSCG00000028606	0.76789
ENSSSCG00000001885	ENSSSCG00000030947	0.719848
ENSSSCG00000001885	ENSSSCG00000031562	0.798317
ENSSSCG00000001885	ENSSSCG00000032242	0.771902
ENSSSCG00000001885	ENSSSCG00000034654	0.752819
ENSSSCG00000001885	ENSSSCG00000035212	-0.742398
ENSSSCG00000001885	ENSSSCG00000035952	0.804311
ENSSSCG00000001885	ENSSSCG00000036340	0.701002
ENSSSCG00000001885	ENSSSCG00000036933	0.750684
ENSSSCG00000001885	ENSSSCG00000037762	0.781883
ENSSSCG00000001885	ENSSSCG00000038313	0.702048
ENSSSCG00000001885	ENSSSCG00000040107	0.811442
ENSSSCG00000001892	ENSSSCG00000001898	0.73251
ENSSSCG00000001892	ENSSSCG00000002281	0.725875
ENSSSCG00000001892	ENSSSCG00000002283	-0.846454
ENSSSCG00000001892	ENSSSCG00000002305	0.702136
ENSSSCG00000001892	ENSSSCG00000002392	0.906793
ENSSSCG00000001892	ENSSSCG00000002412	0.817253
ENSSSCG00000001892	ENSSSCG00000002806	0.830142
ENSSSCG00000001892	ENSSSCG00000002812	0.791722
ENSSSCG00000001892	ENSSSCG00000002993	0.700038
ENSSSCG00000001892	ENSSSCG00000003369	0.917223
ENSSSCG00000001892	ENSSSCG00000003428	0.857126
ENSSSCG00000001892	ENSSSCG00000003549	0.8174
ENSSSCG00000001892	ENSSSCG00000003579	0.748186
ENSSSCG00000001892	ENSSSCG00000003590	0.730114
ENSSSCG00000001892	ENSSSCG00000004399	0.837603
ENSSSCG00000001892	ENSSSCG00000004929	0.729308
ENSSSCG00000001892	ENSSSCG00000004954	0.833379
ENSSSCG00000001892	ENSSSCG00000005288	-0.797411
ENSSSCG00000001892	ENSSSCG00000005301	0.795712
ENSSSCG00000001892	ENSSSCG00000005501	0.875376
ENSSSCG00000001892	ENSSSCG00000005631	-0.781734
ENSSSCG00000001892	ENSSSCG00000005648	0.844448
ENSSSCG00000001892	ENSSSCG00000005669	0.828688
ENSSSCG00000001892	ENSSSCG00000005981	-0.772723
ENSSSCG00000001892	ENSSSCG00000006231	-0.79358
ENSSSCG00000001892	ENSSSCG00000006290	-0.845599
ENSSSCG00000001892	ENSSSCG00000006340	-0.726983
ENSSSCG00000001892	ENSSSCG00000006698	0.886625
ENSSSCG00000001892	ENSSSCG00000006740	0.918699
ENSSSCG00000001892	ENSSSCG00000006893	0.73743
ENSSSCG00000001892	ENSSSCG00000007317	0.892811
ENSSSCG00000001892	ENSSSCG00000007465	-0.720236
ENSSSCG00000001892	ENSSSCG00000007993	0.827373
ENSSSCG00000001892	ENSSSCG00000008132	0.715734
ENSSSCG00000001892	ENSSSCG00000008337	0.709633
ENSSSCG00000001892	ENSSSCG00000008349	0.88732
ENSSSCG00000001892	ENSSSCG00000009029	-0.747897
ENSSSCG00000001892	ENSSSCG00000009464	-0.770777
ENSSSCG00000001892	ENSSSCG00000009605	0.824359
ENSSSCG00000001892	ENSSSCG00000009672	0.713438
ENSSSCG00000001892	ENSSSCG00000009755	0.737125
ENSSSCG00000001892	ENSSSCG00000009801	0.816218
ENSSSCG00000001892	ENSSSCG00000009807	0.747347
ENSSSCG00000001892	ENSSSCG00000009808	0.757395
ENSSSCG00000001892	ENSSSCG00000010118	0.942359
ENSSSCG00000001892	ENSSSCG00000010330	0.758223
ENSSSCG00000001892	ENSSSCG00000010456	0.704762
ENSSSCG00000001892	ENSSSCG00000010517	0.747391
ENSSSCG00000001892	ENSSSCG00000010529	0.784227
ENSSSCG00000001892	ENSSSCG00000010822	0.833328
ENSSSCG00000001892	ENSSSCG00000010992	0.836789
ENSSSCG00000001892	ENSSSCG00000011075	-0.741206
ENSSSCG00000001892	ENSSSCG00000011199	-0.885425
ENSSSCG00000001892	ENSSSCG00000011350	0.866333
ENSSSCG00000001892	ENSSSCG00000011379	0.802654
ENSSSCG00000001892	ENSSSCG00000011401	0.808024
ENSSSCG00000001892	ENSSSCG00000011849	0.7869
ENSSSCG00000001892	ENSSSCG00000012241	0.72976
ENSSSCG00000001892	ENSSSCG00000012361	0.881721
ENSSSCG00000001892	ENSSSCG00000012966	0.830597
ENSSSCG00000001892	ENSSSCG00000013110	0.820061
ENSSSCG00000001892	ENSSSCG00000013113	0.754687
ENSSSCG00000001892	ENSSSCG00000013178	0.837255
ENSSSCG00000001892	ENSSSCG00000013292	0.779508
ENSSSCG00000001892	ENSSSCG00000013667	0.787838
ENSSSCG00000001892	ENSSSCG00000014056	0.742325
ENSSSCG00000001892	ENSSSCG00000014132	-0.736638
ENSSSCG00000001892	ENSSSCG00000014156	-0.772163
ENSSSCG00000001892	ENSSSCG00000014168	-0.756351
ENSSSCG00000001892	ENSSSCG00000014875	0.776897
ENSSSCG00000001892	ENSSSCG00000015242	0.830358
ENSSSCG00000001892	ENSSSCG00000015283	0.878939
ENSSSCG00000001892	ENSSSCG00000015334	-0.862457
ENSSSCG00000001892	ENSSSCG00000015519	-0.772963
ENSSSCG00000001892	ENSSSCG00000015613	0.785447
ENSSSCG00000001892	ENSSSCG00000015774	-0.704227
ENSSSCG00000001892	ENSSSCG00000015872	-0.73412
ENSSSCG00000001892	ENSSSCG00000016068	-0.770777
ENSSSCG00000001892	ENSSSCG00000016191	0.791319
ENSSSCG00000001892	ENSSSCG00000016792	-0.753495
ENSSSCG00000001892	ENSSSCG00000017134	0.754969
ENSSSCG00000001892	ENSSSCG00000017195	0.817282
ENSSSCG00000001892	ENSSSCG00000017254	-0.777981
ENSSSCG00000001892	ENSSSCG00000017260	0.836375
ENSSSCG00000001892	ENSSSCG00000017274	-0.788355
ENSSSCG00000001892	ENSSSCG00000017391	0.820468
ENSSSCG00000001892	ENSSSCG00000017414	0.899085
ENSSSCG00000001892	ENSSSCG00000017498	0.702688
ENSSSCG00000001892	ENSSSCG00000017506	-0.737797
ENSSSCG00000001892	ENSSSCG00000017518	0.872334
ENSSSCG00000001892	ENSSSCG00000017528	0.880133
ENSSSCG00000001892	ENSSSCG00000017573	0.841345
ENSSSCG00000001892	ENSSSCG00000017584	0.853701
ENSSSCG00000001892	ENSSSCG00000017885	0.896812
ENSSSCG00000001892	ENSSSCG00000017986	-0.855822
ENSSSCG00000001892	ENSSSCG00000021408	0.70114
ENSSSCG00000001892	ENSSSCG00000021436	0.823027
ENSSSCG00000001892	ENSSSCG00000021638	0.914402
ENSSSCG00000001892	ENSSSCG00000022347	0.727059
ENSSSCG00000001892	ENSSSCG00000022687	0.914432
ENSSSCG00000001892	ENSSSCG00000022837	0.809039
ENSSSCG00000001892	ENSSSCG00000023105	-0.762599
ENSSSCG00000001892	ENSSSCG00000023714	0.784124
ENSSSCG00000001892	ENSSSCG00000024907	0.803245
ENSSSCG00000001892	ENSSSCG00000025194	-0.733797
ENSSSCG00000001892	ENSSSCG00000025448	0.79995
ENSSSCG00000001892	ENSSSCG00000025638	0.841344
ENSSSCG00000001892	ENSSSCG00000025647	0.829675
ENSSSCG00000001892	ENSSSCG00000025698	-0.713662
ENSSSCG00000001892	ENSSSCG00000025943	0.853078
ENSSSCG00000001892	ENSSSCG00000026446	0.779752
ENSSSCG00000001892	ENSSSCG00000026741	0.873269
ENSSSCG00000001892	ENSSSCG00000027105	-0.745622
ENSSSCG00000001892	ENSSSCG00000027628	-0.753951
ENSSSCG00000001892	ENSSSCG00000027646	-0.779869
ENSSSCG00000001892	ENSSSCG00000027952	0.723215
ENSSSCG00000001892	ENSSSCG00000028045	0.770897
ENSSSCG00000001892	ENSSSCG00000028878	0.763858
ENSSSCG00000001892	ENSSSCG00000029275	-0.72367
ENSSSCG00000001892	ENSSSCG00000029687	0.756751
ENSSSCG00000001892	ENSSSCG00000029711	0.83181
ENSSSCG00000001892	ENSSSCG00000029838	0.844236
ENSSSCG00000001892	ENSSSCG00000031159	0.764123
ENSSSCG00000001892	ENSSSCG00000031262	-0.722978
ENSSSCG00000001892	ENSSSCG00000031420	0.733313
ENSSSCG00000001892	ENSSSCG00000031728	-0.765353
ENSSSCG00000001892	ENSSSCG00000032094	-0.706593
ENSSSCG00000001892	ENSSSCG00000032366	0.854265
ENSSSCG00000001892	ENSSSCG00000032728	0.705214
ENSSSCG00000001892	ENSSSCG00000032835	0.795343
ENSSSCG00000001892	ENSSSCG00000032877	-0.727741
ENSSSCG00000001892	ENSSSCG00000033196	0.824858
ENSSSCG00000001892	ENSSSCG00000033541	0.722982
ENSSSCG00000001892	ENSSSCG00000034494	0.774194
ENSSSCG00000001892	ENSSSCG00000035037	-0.705325
ENSSSCG00000001892	ENSSSCG00000035518	0.831469
ENSSSCG00000001892	ENSSSCG00000036030	0.842136
ENSSSCG00000001892	ENSSSCG00000037066	-0.724173
ENSSSCG00000001892	ENSSSCG00000037292	0.721853
ENSSSCG00000001892	ENSSSCG00000037520	0.825764
ENSSSCG00000001892	ENSSSCG00000037912	0.7733
ENSSSCG00000001892	ENSSSCG00000038038	0.881247
ENSSSCG00000001892	ENSSSCG00000038967	0.900129
ENSSSCG00000001892	ENSSSCG00000039419	-0.771463
ENSSSCG00000001892	ENSSSCG00000039867	0.70292
ENSSSCG00000001892	ENSSSCG00000040334	0.882482
ENSSSCG00000001892	ENSSSCG00000040559	0.836922
ENSSSCG00000001892	ENSSSCG00000001619	0.709106
ENSSSCG00000001892	ENSSSCG00000003264	0.758409
ENSSSCG00000001892	ENSSSCG00000003407	0.823423
ENSSSCG00000001892	ENSSSCG00000004138	-0.826235
ENSSSCG00000001892	ENSSSCG00000004332	-0.876005
ENSSSCG00000001892	ENSSSCG00000005385	-0.803719
ENSSSCG00000001892	ENSSSCG00000005589	-0.71449
ENSSSCG00000001892	ENSSSCG00000006331	-0.754355
ENSSSCG00000001892	ENSSSCG00000008171	0.780877
ENSSSCG00000001892	ENSSSCG00000009676	0.728335
ENSSSCG00000001892	ENSSSCG00000010219	-0.822576
ENSSSCG00000001892	ENSSSCG00000012287	0.798454
ENSSSCG00000001892	ENSSSCG00000013375	0.719115
ENSSSCG00000001892	ENSSSCG00000013397	0.782278
ENSSSCG00000001892	ENSSSCG00000013501	0.8347
ENSSSCG00000001892	ENSSSCG00000013873	0.723947
ENSSSCG00000001892	ENSSSCG00000015595	-0.763767
ENSSSCG00000001892	ENSSSCG00000015715	0.87933
ENSSSCG00000001892	ENSSSCG00000015982	0.751426
ENSSSCG00000001892	ENSSSCG00000016690	-0.75307
ENSSSCG00000001892	ENSSSCG00000017251	-0.725178
ENSSSCG00000001892	ENSSSCG00000017475	0.820704
ENSSSCG00000001892	ENSSSCG00000017950	0.845655
ENSSSCG00000001892	ENSSSCG00000023653	0.867114
ENSSSCG00000001892	ENSSSCG00000026103	0.834219
ENSSSCG00000001892	ENSSSCG00000026161	0.762264
ENSSSCG00000001892	ENSSSCG00000026894	-0.786712
ENSSSCG00000001892	ENSSSCG00000028190	0.801027
ENSSSCG00000001892	ENSSSCG00000028606	0.737147
ENSSSCG00000001892	ENSSSCG00000030165	-0.781619
ENSSSCG00000001892	ENSSSCG00000034654	0.798679
ENSSSCG00000001892	ENSSSCG00000035101	-0.747592
ENSSSCG00000001892	ENSSSCG00000035212	-0.728827
ENSSSCG00000001892	ENSSSCG00000035537	-0.817311
ENSSSCG00000001892	ENSSSCG00000036340	0.862201
ENSSSCG00000001892	ENSSSCG00000037766	-0.713767
ENSSSCG00000001892	ENSSSCG00000037970	0.775729
ENSSSCG00000001892	ENSSSCG00000040107	0.708717
ENSSSCG00000001898	ENSSSCG00000003428	0.763228
ENSSSCG00000001898	ENSSSCG00000004399	0.706278
ENSSSCG00000001898	ENSSSCG00000005301	0.714127
ENSSSCG00000001898	ENSSSCG00000005501	0.753901
ENSSSCG00000001898	ENSSSCG00000006698	0.765095
ENSSSCG00000001898	ENSSSCG00000007317	0.753454
ENSSSCG00000001898	ENSSSCG00000009672	0.703314
ENSSSCG00000001898	ENSSSCG00000009801	0.747185
ENSSSCG00000001898	ENSSSCG00000010992	0.821169
ENSSSCG00000001898	ENSSSCG00000011350	0.716967
ENSSSCG00000001898	ENSSSCG00000012361	0.760969
ENSSSCG00000001898	ENSSSCG00000014056	0.766918
ENSSSCG00000001898	ENSSSCG00000015283	0.765515
ENSSSCG00000001898	ENSSSCG00000015334	-0.746157
ENSSSCG00000001898	ENSSSCG00000017134	0.726222
ENSSSCG00000001898	ENSSSCG00000017518	0.709163
ENSSSCG00000001898	ENSSSCG00000021436	0.729723
ENSSSCG00000001898	ENSSSCG00000021638	0.769101
ENSSSCG00000001898	ENSSSCG00000022687	0.70871
ENSSSCG00000001898	ENSSSCG00000029711	0.741266
ENSSSCG00000001898	ENSSSCG00000032043	0.791212
ENSSSCG00000001898	ENSSSCG00000032450	0.710361
ENSSSCG00000001898	ENSSSCG00000032835	0.715638
ENSSSCG00000001898	ENSSSCG00000035518	0.702251
ENSSSCG00000001898	ENSSSCG00000037292	0.812773
ENSSSCG00000001898	ENSSSCG00000009676	0.76402
ENSSSCG00000001898	ENSSSCG00000013397	0.781466
ENSSSCG00000001898	ENSSSCG00000017251	-0.724372
ENSSSCG00000001898	ENSSSCG00000023653	0.751415
ENSSSCG00000001898	ENSSSCG00000036340	0.747598
ENSSSCG00000001921	ENSSSCG00000002283	0.701906
ENSSSCG00000001921	ENSSSCG00000003747	0.710579
ENSSSCG00000001921	ENSSSCG00000003805	0.841185
ENSSSCG00000001921	ENSSSCG00000004918	0.770038
ENSSSCG00000001921	ENSSSCG00000004980	0.731845
ENSSSCG00000001921	ENSSSCG00000005288	0.72551
ENSSSCG00000001921	ENSSSCG00000007993	-0.750481
ENSSSCG00000001921	ENSSSCG00000008464	0.772973
ENSSSCG00000001921	ENSSSCG00000009029	0.709686
ENSSSCG00000001921	ENSSSCG00000009364	0.843377
ENSSSCG00000001921	ENSSSCG00000009716	0.71445
ENSSSCG00000001921	ENSSSCG00000010464	0.790599
ENSSSCG00000001921	ENSSSCG00000010626	0.717677
ENSSSCG00000001921	ENSSSCG00000011076	0.825763
ENSSSCG00000001921	ENSSSCG00000011499	0.859012
ENSSSCG00000001921	ENSSSCG00000013351	0.736532
ENSSSCG00000001921	ENSSSCG00000013655	0.732878
ENSSSCG00000001921	ENSSSCG00000015872	0.762464
ENSSSCG00000001921	ENSSSCG00000017254	0.745937
ENSSSCG00000001921	ENSSSCG00000017986	0.7399
ENSSSCG00000001921	ENSSSCG00000021232	0.725443
ENSSSCG00000001921	ENSSSCG00000022256	0.708911
ENSSSCG00000001921	ENSSSCG00000023105	0.771374
ENSSSCG00000001921	ENSSSCG00000023133	0.768282
ENSSSCG00000001921	ENSSSCG00000024416	0.724978
ENSSSCG00000001921	ENSSSCG00000028056	0.797309
ENSSSCG00000001921	ENSSSCG00000028117	0.757311
ENSSSCG00000001921	ENSSSCG00000028322	0.812068
ENSSSCG00000001921	ENSSSCG00000028572	0.712162
ENSSSCG00000001921	ENSSSCG00000029507	0.762731
ENSSSCG00000001921	ENSSSCG00000031262	0.770294
ENSSSCG00000001921	ENSSSCG00000035037	0.776425
ENSSSCG00000001921	ENSSSCG00000035774	0.795776
ENSSSCG00000001921	ENSSSCG00000037201	0.708121
ENSSSCG00000001921	ENSSSCG00000038500	0.812712
ENSSSCG00000001921	ENSSSCG00000038727	0.851403
ENSSSCG00000001921	ENSSSCG00000039419	0.762844
ENSSSCG00000001921	ENSSSCG00000002383	0.707596
ENSSSCG00000001921	ENSSSCG00000005965	0.723842
ENSSSCG00000001921	ENSSSCG00000006331	0.748992
ENSSSCG00000001921	ENSSSCG00000006625	0.752136
ENSSSCG00000001921	ENSSSCG00000008171	-0.749281
ENSSSCG00000001921	ENSSSCG00000010224	0.727654
ENSSSCG00000001921	ENSSSCG00000015595	0.779453
ENSSSCG00000001921	ENSSSCG00000026533	0.707287
ENSSSCG00000001921	ENSSSCG00000029578	0.729909
ENSSSCG00000001921	ENSSSCG00000031321	0.825856
ENSSSCG00000001921	ENSSSCG00000032527	0.710688
ENSSSCG00000001921	ENSSSCG00000036136	0.748072
ENSSSCG00000001921	ENSSSCG00000038948	0.751754
ENSSSCG00000001988	ENSSSCG00000004918	0.753336
ENSSSCG00000001988	ENSSSCG00000007034	0.726468
ENSSSCG00000001988	ENSSSCG00000009029	0.754805
ENSSSCG00000001988	ENSSSCG00000010329	0.740339
ENSSSCG00000001988	ENSSSCG00000010464	0.72556
ENSSSCG00000001988	ENSSSCG00000011076	0.791713
ENSSSCG00000001988	ENSSSCG00000011499	0.739795
ENSSSCG00000001988	ENSSSCG00000011641	0.758402
ENSSSCG00000001988	ENSSSCG00000013351	0.737732
ENSSSCG00000001988	ENSSSCG00000013655	0.721337
ENSSSCG00000001988	ENSSSCG00000016338	0.811259
ENSSSCG00000001988	ENSSSCG00000017986	0.726657
ENSSSCG00000001988	ENSSSCG00000021638	-0.742084
ENSSSCG00000001988	ENSSSCG00000023714	-0.700049
ENSSSCG00000001988	ENSSSCG00000025698	0.710189
ENSSSCG00000001988	ENSSSCG00000028117	0.774696
ENSSSCG00000001988	ENSSSCG00000028322	0.746683
ENSSSCG00000001988	ENSSSCG00000031728	0.736069
ENSSSCG00000001988	ENSSSCG00000035774	0.795766
ENSSSCG00000001988	ENSSSCG00000036223	0.717726
ENSSSCG00000001988	ENSSSCG00000038374	0.789009
ENSSSCG00000001988	ENSSSCG00000038500	0.764183
ENSSSCG00000001988	ENSSSCG00000039419	0.728131
ENSSSCG00000001988	ENSSSCG00000004856	0.702244
ENSSSCG00000001988	ENSSSCG00000005965	0.804848
ENSSSCG00000001988	ENSSSCG00000008443	0.778184
ENSSSCG00000001988	ENSSSCG00000009865	0.783688
ENSSSCG00000001988	ENSSSCG00000011125	0.765331
ENSSSCG00000001988	ENSSSCG00000011264	0.724541
ENSSSCG00000001988	ENSSSCG00000015595	0.747806
ENSSSCG00000001988	ENSSSCG00000030165	0.804524
ENSSSCG00000001988	ENSSSCG00000031321	0.75819
ENSSSCG00000001988	ENSSSCG00000034297	0.743111
ENSSSCG00000001988	ENSSSCG00000034708	-0.704783
ENSSSCG00000001988	ENSSSCG00000037970	-0.721919
ENSSSCG00000001988	ENSSSCG00000038948	0.706703
ENSSSCG00000002140	ENSSSCG00000002283	0.733282
ENSSSCG00000002140	ENSSSCG00000004215	0.732763
ENSSSCG00000002140	ENSSSCG00000005648	-0.731599
ENSSSCG00000002140	ENSSSCG00000005669	-0.700974
ENSSSCG00000002140	ENSSSCG00000008464	0.755435
ENSSSCG00000002140	ENSSSCG00000013178	-0.713144
ENSSSCG00000002140	ENSSSCG00000014132	0.736376
ENSSSCG00000002140	ENSSSCG00000017254	0.789486
ENSSSCG00000002140	ENSSSCG00000017584	-0.718869
ENSSSCG00000002140	ENSSSCG00000021232	0.787447
ENSSSCG00000002140	ENSSSCG00000022347	-0.715483
ENSSSCG00000002140	ENSSSCG00000023105	0.705925
ENSSSCG00000002140	ENSSSCG00000028045	-0.703322
ENSSSCG00000002140	ENSSSCG00000032366	-0.714183
ENSSSCG00000002140	ENSSSCG00000032877	0.766021
ENSSSCG00000002140	ENSSSCG00000038423	0.703574
ENSSSCG00000002140	ENSSSCG00000026894	0.801511
ENSSSCG00000002252	ENSSSCG00000002281	-0.730266
ENSSSCG00000002252	ENSSSCG00000002412	-0.731605
ENSSSCG00000002252	ENSSSCG00000002812	-0.716106
ENSSSCG00000002252	ENSSSCG00000003549	-0.826687
ENSSSCG00000002252	ENSSSCG00000004215	0.737961
ENSSSCG00000002252	ENSSSCG00000005648	-0.769515
ENSSSCG00000002252	ENSSSCG00000005669	-0.70621
ENSSSCG00000002252	ENSSSCG00000006290	0.813851
ENSSSCG00000002252	ENSSSCG00000006340	0.748722
ENSSSCG00000002252	ENSSSCG00000006698	-0.723153
ENSSSCG00000002252	ENSSSCG00000007235	0.734442
ENSSSCG00000002252	ENSSSCG00000007465	0.798301
ENSSSCG00000002252	ENSSSCG00000008132	-0.775992
ENSSSCG00000002252	ENSSSCG00000008374	0.755893
ENSSSCG00000002252	ENSSSCG00000009152	0.745831
ENSSSCG00000002252	ENSSSCG00000009464	0.767892
ENSSSCG00000002252	ENSSSCG00000009716	0.76196
ENSSSCG00000002252	ENSSSCG00000010118	-0.730021
ENSSSCG00000002252	ENSSSCG00000010429	0.70875
ENSSSCG00000002252	ENSSSCG00000010509	0.797312
ENSSSCG00000002252	ENSSSCG00000011199	0.740303
ENSSSCG00000002252	ENSSSCG00000011379	-0.767942
ENSSSCG00000002252	ENSSSCG00000011496	0.763512
ENSSSCG00000002252	ENSSSCG00000012663	0.822337
ENSSSCG00000002252	ENSSSCG00000012966	-0.789737
ENSSSCG00000002252	ENSSSCG00000013110	-0.748465
ENSSSCG00000002252	ENSSSCG00000014132	0.765045
ENSSSCG00000002252	ENSSSCG00000014156	0.750012
ENSSSCG00000002252	ENSSSCG00000014168	0.917382
ENSSSCG00000002252	ENSSSCG00000015242	-0.779169
ENSSSCG00000002252	ENSSSCG00000015519	0.741285
ENSSSCG00000002252	ENSSSCG00000015659	0.783434
ENSSSCG00000002252	ENSSSCG00000015814	0.773158
ENSSSCG00000002252	ENSSSCG00000015969	0.743091
ENSSSCG00000002252	ENSSSCG00000016068	0.809685
ENSSSCG00000002252	ENSSSCG00000017260	-0.714417
ENSSSCG00000002252	ENSSSCG00000017274	0.750771
ENSSSCG00000002252	ENSSSCG00000017414	-0.739308
ENSSSCG00000002252	ENSSSCG00000017528	-0.809617
ENSSSCG00000002252	ENSSSCG00000017573	-0.763014
ENSSSCG00000002252	ENSSSCG00000017584	-0.797705
ENSSSCG00000002252	ENSSSCG00000023806	0.735093
ENSSSCG00000002252	ENSSSCG00000024907	-0.786007
ENSSSCG00000002252	ENSSSCG00000025194	0.807687
ENSSSCG00000002252	ENSSSCG00000025943	-0.754511
ENSSSCG00000002252	ENSSSCG00000027105	0.733917
ENSSSCG00000002252	ENSSSCG00000027646	0.830741
ENSSSCG00000002252	ENSSSCG00000028045	-0.781062
ENSSSCG00000002252	ENSSSCG00000028878	-0.725
ENSSSCG00000002252	ENSSSCG00000031262	0.703974
ENSSSCG00000002252	ENSSSCG00000031420	-0.735835
ENSSSCG00000002252	ENSSSCG00000032094	0.736463
ENSSSCG00000002252	ENSSSCG00000032366	-0.770337
ENSSSCG00000002252	ENSSSCG00000032877	0.799458
ENSSSCG00000002252	ENSSSCG00000035037	0.776135
ENSSSCG00000002252	ENSSSCG00000036723	0.760685
ENSSSCG00000002252	ENSSSCG00000037912	-0.717005
ENSSSCG00000002252	ENSSSCG00000038132	0.741214
ENSSSCG00000002252	ENSSSCG00000038967	-0.71874
ENSSSCG00000002252	ENSSSCG00000039998	0.777101
ENSSSCG00000002252	ENSSSCG00000040445	0.905094
ENSSSCG00000002252	ENSSSCG00000000902	0.778395
ENSSSCG00000002252	ENSSSCG00000001061	0.747989
ENSSSCG00000002252	ENSSSCG00000001474	-0.764746
ENSSSCG00000002252	ENSSSCG00000001619	-0.774966
ENSSSCG00000002252	ENSSSCG00000002769	-0.766776
ENSSSCG00000002252	ENSSSCG00000003407	-0.715375
ENSSSCG00000002252	ENSSSCG00000004938	0.739558
ENSSSCG00000002252	ENSSSCG00000005096	0.800569
ENSSSCG00000002252	ENSSSCG00000006018	0.743692
ENSSSCG00000002252	ENSSSCG00000006155	0.785009
ENSSSCG00000002252	ENSSSCG00000006331	0.733585
ENSSSCG00000002252	ENSSSCG00000006346	0.75841
ENSSSCG00000002252	ENSSSCG00000007311	0.802192
ENSSSCG00000002252	ENSSSCG00000007484	0.769324
ENSSSCG00000002252	ENSSSCG00000007559	-0.712178
ENSSSCG00000002252	ENSSSCG00000007767	-0.792247
ENSSSCG00000002252	ENSSSCG00000008099	0.771018
ENSSSCG00000002252	ENSSSCG00000008553	-0.72044
ENSSSCG00000002252	ENSSSCG00000009440	0.801562
ENSSSCG00000002252	ENSSSCG00000011810	0.832396
ENSSSCG00000002252	ENSSSCG00000011951	0.852321
ENSSSCG00000002252	ENSSSCG00000012029	0.817591
ENSSSCG00000002252	ENSSSCG00000012620	0.746436
ENSSSCG00000002252	ENSSSCG00000012981	-0.719113
ENSSSCG00000002252	ENSSSCG00000013028	-0.737562
ENSSSCG00000002252	ENSSSCG00000013501	-0.75642
ENSSSCG00000002252	ENSSSCG00000013873	-0.72163
ENSSSCG00000002252	ENSSSCG00000015112	-0.731447
ENSSSCG00000002252	ENSSSCG00000015235	0.802731
ENSSSCG00000002252	ENSSSCG00000015357	0.724244
ENSSSCG00000002252	ENSSSCG00000015871	0.822855
ENSSSCG00000002252	ENSSSCG00000015982	-0.853707
ENSSSCG00000002252	ENSSSCG00000015987	0.752427
ENSSSCG00000002252	ENSSSCG00000016057	0.752806
ENSSSCG00000002252	ENSSSCG00000016690	0.725428
ENSSSCG00000002252	ENSSSCG00000017516	-0.80662
ENSSSCG00000002252	ENSSSCG00000017604	0.762589
ENSSSCG00000002252	ENSSSCG00000017950	-0.838407
ENSSSCG00000002252	ENSSSCG00000021343	0.787022
ENSSSCG00000002252	ENSSSCG00000021646	0.856367
ENSSSCG00000002252	ENSSSCG00000022318	0.748534
ENSSSCG00000002252	ENSSSCG00000023357	0.711808
ENSSSCG00000002252	ENSSSCG00000024152	0.755419
ENSSSCG00000002252	ENSSSCG00000024970	0.763439
ENSSSCG00000002252	ENSSSCG00000025777	0.891206
ENSSSCG00000002252	ENSSSCG00000027017	0.828694
ENSSSCG00000002252	ENSSSCG00000027060	-0.793384
ENSSSCG00000002252	ENSSSCG00000027480	0.85122
ENSSSCG00000002252	ENSSSCG00000029998	0.814106
ENSSSCG00000002252	ENSSSCG00000030095	0.739305
ENSSSCG00000002252	ENSSSCG00000034191	0.767337
ENSSSCG00000002252	ENSSSCG00000035212	0.845146
ENSSSCG00000002252	ENSSSCG00000036546	0.756093
ENSSSCG00000002252	ENSSSCG00000037647	0.765549
ENSSSCG00000002252	ENSSSCG00000037766	0.787042
ENSSSCG00000002252	ENSSSCG00000038313	-0.729044
ENSSSCG00000002252	ENSSSCG00000038443	0.732635
ENSSSCG00000002252	ENSSSCG00000040107	-0.80496
ENSSSCG00000002252	ENSSSCG00000040959	0.727358
ENSSSCG00000002281	ENSSSCG00000002412	0.709905
ENSSSCG00000002281	ENSSSCG00000003369	0.727744
ENSSSCG00000002281	ENSSSCG00000003549	0.769721
ENSSSCG00000002281	ENSSSCG00000005648	0.741339
ENSSSCG00000002281	ENSSSCG00000005669	0.75469
ENSSSCG00000002281	ENSSSCG00000006698	0.768124
ENSSSCG00000002281	ENSSSCG00000007317	0.766403
ENSSSCG00000002281	ENSSSCG00000008132	0.704386
ENSSSCG00000002281	ENSSSCG00000008593	0.710812
ENSSSCG00000002281	ENSSSCG00000009716	-0.715688
ENSSSCG00000002281	ENSSSCG00000010118	0.784716
ENSSSCG00000002281	ENSSSCG00000011379	0.715283
ENSSSCG00000002281	ENSSSCG00000012966	0.769843
ENSSSCG00000002281	ENSSSCG00000013178	0.752621
ENSSSCG00000002281	ENSSSCG00000014168	-0.714267
ENSSSCG00000002281	ENSSSCG00000015242	0.757048
ENSSSCG00000002281	ENSSSCG00000016191	0.71481
ENSSSCG00000002281	ENSSSCG00000017260	0.840002
ENSSSCG00000002281	ENSSSCG00000017414	0.731673
ENSSSCG00000002281	ENSSSCG00000017528	0.758784
ENSSSCG00000002281	ENSSSCG00000017584	0.742776
ENSSSCG00000002281	ENSSSCG00000017987	0.702326
ENSSSCG00000002281	ENSSSCG00000021436	0.734711
ENSSSCG00000002281	ENSSSCG00000024907	0.806266
ENSSSCG00000002281	ENSSSCG00000025647	0.701702
ENSSSCG00000002281	ENSSSCG00000025943	0.73239
ENSSSCG00000002281	ENSSSCG00000028045	0.750592
ENSSSCG00000002281	ENSSSCG00000032366	0.806161
ENSSSCG00000002281	ENSSSCG00000033541	0.703689
ENSSSCG00000002281	ENSSSCG00000034994	0.711865
ENSSSCG00000002281	ENSSSCG00000037190	-0.733109
ENSSSCG00000002281	ENSSSCG00000037912	0.785884
ENSSSCG00000002281	ENSSSCG00000038967	0.750795
ENSSSCG00000002281	ENSSSCG00000039867	0.701598
ENSSSCG00000002281	ENSSSCG00000040559	0.719949
ENSSSCG00000002281	ENSSSCG00000001619	0.724864
ENSSSCG00000002281	ENSSSCG00000003407	0.707088
ENSSSCG00000002281	ENSSSCG00000007559	0.718121
ENSSSCG00000002281	ENSSSCG00000012981	0.764658
ENSSSCG00000002281	ENSSSCG00000015112	0.710262
ENSSSCG00000002281	ENSSSCG00000015871	-0.745725
ENSSSCG00000002281	ENSSSCG00000017475	0.723886
ENSSSCG00000002281	ENSSSCG00000017516	0.711888
ENSSSCG00000002281	ENSSSCG00000017525	0.702433
ENSSSCG00000002281	ENSSSCG00000017950	0.799977
ENSSSCG00000002281	ENSSSCG00000026103	0.726042
ENSSSCG00000002283	ENSSSCG00000002315	0.748501
ENSSSCG00000002283	ENSSSCG00000002392	-0.783726
ENSSSCG00000002283	ENSSSCG00000002806	-0.730934
ENSSSCG00000002283	ENSSSCG00000002812	-0.736484
ENSSSCG00000002283	ENSSSCG00000003369	-0.768965
ENSSSCG00000002283	ENSSSCG00000003428	-0.7576
ENSSSCG00000002283	ENSSSCG00000003747	0.757838
ENSSSCG00000002283	ENSSSCG00000004215	0.710953
ENSSSCG00000002283	ENSSSCG00000004347	0.793447
ENSSSCG00000002283	ENSSSCG00000004954	-0.728687
ENSSSCG00000002283	ENSSSCG00000004980	0.72227
ENSSSCG00000002283	ENSSSCG00000005288	0.850027
ENSSSCG00000002283	ENSSSCG00000005301	-0.702121
ENSSSCG00000002283	ENSSSCG00000005501	-0.728613
ENSSSCG00000002283	ENSSSCG00000005631	0.72375
ENSSSCG00000002283	ENSSSCG00000005648	-0.801707
ENSSSCG00000002283	ENSSSCG00000005669	-0.753576
ENSSSCG00000002283	ENSSSCG00000005981	0.824257
ENSSSCG00000002283	ENSSSCG00000006231	0.871079
ENSSSCG00000002283	ENSSSCG00000006277	0.764938
ENSSSCG00000002283	ENSSSCG00000006290	0.862199
ENSSSCG00000002283	ENSSSCG00000006340	0.800812
ENSSSCG00000002283	ENSSSCG00000006698	-0.773338
ENSSSCG00000002283	ENSSSCG00000006740	-0.750631
ENSSSCG00000002283	ENSSSCG00000007235	0.724503
ENSSSCG00000002283	ENSSSCG00000007317	-0.717613
ENSSSCG00000002283	ENSSSCG00000007465	0.828219
ENSSSCG00000002283	ENSSSCG00000007993	-0.790111
ENSSSCG00000002283	ENSSSCG00000008162	0.775291
ENSSSCG00000002283	ENSSSCG00000008374	0.735778
ENSSSCG00000002283	ENSSSCG00000009029	0.805153
ENSSSCG00000002283	ENSSSCG00000009464	0.849464
ENSSSCG00000002283	ENSSSCG00000009605	-0.788354
ENSSSCG00000002283	ENSSSCG00000010118	-0.780312
ENSSSCG00000002283	ENSSSCG00000010210	0.85277
ENSSSCG00000002283	ENSSSCG00000010330	-0.707028
ENSSSCG00000002283	ENSSSCG00000010517	-0.708423
ENSSSCG00000002283	ENSSSCG00000010529	-0.776169
ENSSSCG00000002283	ENSSSCG00000010626	0.728254
ENSSSCG00000002283	ENSSSCG00000010822	-0.727629
ENSSSCG00000002283	ENSSSCG00000010992	-0.709493
ENSSSCG00000002283	ENSSSCG00000011075	0.767324
ENSSSCG00000002283	ENSSSCG00000011076	0.719741
ENSSSCG00000002283	ENSSSCG00000011199	0.800668
ENSSSCG00000002283	ENSSSCG00000011350	-0.759731
ENSSSCG00000002283	ENSSSCG00000011496	0.777217
ENSSSCG00000002283	ENSSSCG00000011499	0.730779
ENSSSCG00000002283	ENSSSCG00000011849	-0.703661
ENSSSCG00000002283	ENSSSCG00000012361	-0.789701
ENSSSCG00000002283	ENSSSCG00000012663	0.837719
ENSSSCG00000002283	ENSSSCG00000012966	-0.740221
ENSSSCG00000002283	ENSSSCG00000013110	-0.744909
ENSSSCG00000002283	ENSSSCG00000013113	-0.710543
ENSSSCG00000002283	ENSSSCG00000013178	-0.733866
ENSSSCG00000002283	ENSSSCG00000013292	-0.750203
ENSSSCG00000002283	ENSSSCG00000014132	0.836547
ENSSSCG00000002283	ENSSSCG00000014156	0.89933
ENSSSCG00000002283	ENSSSCG00000014168	0.819756
ENSSSCG00000002283	ENSSSCG00000015334	0.906554
ENSSSCG00000002283	ENSSSCG00000015519	0.814475
ENSSSCG00000002283	ENSSSCG00000015774	0.849932
ENSSSCG00000002283	ENSSSCG00000015814	0.851146
ENSSSCG00000002283	ENSSSCG00000015872	0.841886
ENSSSCG00000002283	ENSSSCG00000016068	0.802084
ENSSSCG00000002283	ENSSSCG00000016134	0.739728
ENSSSCG00000002283	ENSSSCG00000016338	0.729468
ENSSSCG00000002283	ENSSSCG00000016605	0.74343
ENSSSCG00000002283	ENSSSCG00000016606	0.708184
ENSSSCG00000002283	ENSSSCG00000016792	0.769032
ENSSSCG00000002283	ENSSSCG00000017137	-0.714916
ENSSSCG00000002283	ENSSSCG00000017254	0.806717
ENSSSCG00000002283	ENSSSCG00000017274	0.888316
ENSSSCG00000002283	ENSSSCG00000017414	-0.705757
ENSSSCG00000002283	ENSSSCG00000017506	0.809618
ENSSSCG00000002283	ENSSSCG00000017528	-0.734331
ENSSSCG00000002283	ENSSSCG00000017573	-0.725143
ENSSSCG00000002283	ENSSSCG00000017584	-0.775358
ENSSSCG00000002283	ENSSSCG00000017885	-0.767059
ENSSSCG00000002283	ENSSSCG00000017986	0.842472
ENSSSCG00000002283	ENSSSCG00000021638	-0.79214
ENSSSCG00000002283	ENSSSCG00000022347	-0.715985
ENSSSCG00000002283	ENSSSCG00000022687	-0.74707
ENSSSCG00000002283	ENSSSCG00000023105	0.855518
ENSSSCG00000002283	ENSSSCG00000023181	0.73424
ENSSSCG00000002283	ENSSSCG00000024960	0.774603
ENSSSCG00000002283	ENSSSCG00000025194	0.778767
ENSSSCG00000002283	ENSSSCG00000025638	-0.706656
ENSSSCG00000002283	ENSSSCG00000025647	-0.747685
ENSSSCG00000002283	ENSSSCG00000025698	0.751015
ENSSSCG00000002283	ENSSSCG00000025943	-0.772678
ENSSSCG00000002283	ENSSSCG00000026741	-0.750299
ENSSSCG00000002283	ENSSSCG00000027105	0.859001
ENSSSCG00000002283	ENSSSCG00000027628	0.832419
ENSSSCG00000002283	ENSSSCG00000027646	0.812665
ENSSSCG00000002283	ENSSSCG00000027684	0.739963
ENSSSCG00000002283	ENSSSCG00000028045	-0.757418
ENSSSCG00000002283	ENSSSCG00000028117	0.701387
ENSSSCG00000002283	ENSSSCG00000028277	0.739645
ENSSSCG00000002283	ENSSSCG00000028878	-0.759533
ENSSSCG00000002283	ENSSSCG00000029838	-0.74048
ENSSSCG00000002283	ENSSSCG00000031262	0.80798
ENSSSCG00000002283	ENSSSCG00000031420	-0.723725
ENSSSCG00000002283	ENSSSCG00000031728	0.73654
ENSSSCG00000002283	ENSSSCG00000031866	0.71957
ENSSSCG00000002283	ENSSSCG00000032094	0.733978
ENSSSCG00000002283	ENSSSCG00000032366	-0.775321
ENSSSCG00000002283	ENSSSCG00000032877	0.793735
ENSSSCG00000002283	ENSSSCG00000033146	0.714893
ENSSSCG00000002283	ENSSSCG00000034494	-0.738436
ENSSSCG00000002283	ENSSSCG00000035037	0.7287
ENSSSCG00000002283	ENSSSCG00000035774	0.710021
ENSSSCG00000002283	ENSSSCG00000036030	-0.73791
ENSSSCG00000002283	ENSSSCG00000036331	0.752868
ENSSSCG00000002283	ENSSSCG00000037066	0.805344
ENSSSCG00000002283	ENSSSCG00000038038	-0.801665
ENSSSCG00000002283	ENSSSCG00000038423	0.836989
ENSSSCG00000002283	ENSSSCG00000038967	-0.807724
ENSSSCG00000002283	ENSSSCG00000039419	0.745198
ENSSSCG00000002283	ENSSSCG00000040334	-0.790293
ENSSSCG00000002283	ENSSSCG00000040445	0.709647
ENSSSCG00000002283	ENSSSCG00000040559	-0.731087
ENSSSCG00000002283	ENSSSCG00000003407	-0.753334
ENSSSCG00000002283	ENSSSCG00000004138	0.815541
ENSSSCG00000002283	ENSSSCG00000004332	0.890061
ENSSSCG00000002283	ENSSSCG00000004387	0.752886
ENSSSCG00000002283	ENSSSCG00000005385	0.707865
ENSSSCG00000002283	ENSSSCG00000005589	0.711656
ENSSSCG00000002283	ENSSSCG00000006018	0.701887
ENSSSCG00000002283	ENSSSCG00000006331	0.760163
ENSSSCG00000002283	ENSSSCG00000007484	0.748002
ENSSSCG00000002283	ENSSSCG00000008443	0.703931
ENSSSCG00000002283	ENSSSCG00000009370	0.729833
ENSSSCG00000002283	ENSSSCG00000009865	0.733061
ENSSSCG00000002283	ENSSSCG00000010219	0.788216
ENSSSCG00000002283	ENSSSCG00000010224	0.729467
ENSSSCG00000002283	ENSSSCG00000011125	0.734194
ENSSSCG00000002283	ENSSSCG00000011201	0.73895
ENSSSCG00000002283	ENSSSCG00000012029	0.713395
ENSSSCG00000002283	ENSSSCG00000013501	-0.705571
ENSSSCG00000002283	ENSSSCG00000015235	0.71134
ENSSSCG00000002283	ENSSSCG00000015715	-0.767295
ENSSSCG00000002283	ENSSSCG00000015982	-0.71297
ENSSSCG00000002283	ENSSSCG00000016057	0.734558
ENSSSCG00000002283	ENSSSCG00000016690	0.731343
ENSSSCG00000002283	ENSSSCG00000017251	0.711001
ENSSSCG00000002283	ENSSSCG00000017950	-0.716909
ENSSSCG00000002283	ENSSSCG00000021646	0.792067
ENSSSCG00000002283	ENSSSCG00000023653	-0.744564
ENSSSCG00000002283	ENSSSCG00000026894	0.814095
ENSSSCG00000002283	ENSSSCG00000028190	-0.721594
ENSSSCG00000002283	ENSSSCG00000030095	0.820355
ENSSSCG00000002283	ENSSSCG00000030165	0.730518
ENSSSCG00000002283	ENSSSCG00000032527	0.711836
ENSSSCG00000002283	ENSSSCG00000034654	-0.763378
ENSSSCG00000002283	ENSSSCG00000035212	0.834461
ENSSSCG00000002283	ENSSSCG00000035537	0.796651
ENSSSCG00000002283	ENSSSCG00000036340	-0.797228
ENSSSCG00000002283	ENSSSCG00000036742	0.742973
ENSSSCG00000002283	ENSSSCG00000037766	0.704515
ENSSSCG00000002305	ENSSSCG00000002806	0.778746
ENSSSCG00000002305	ENSSSCG00000003527	0.722502
ENSSSCG00000002305	ENSSSCG00000004399	0.728017
ENSSSCG00000002305	ENSSSCG00000004954	0.70897
ENSSSCG00000002305	ENSSSCG00000005501	0.783852
ENSSSCG00000002305	ENSSSCG00000006740	0.774473
ENSSSCG00000002305	ENSSSCG00000006893	0.747536
ENSSSCG00000002305	ENSSSCG00000007350	0.700477
ENSSSCG00000002305	ENSSSCG00000008349	0.727046
ENSSSCG00000002305	ENSSSCG00000009605	0.721736
ENSSSCG00000002305	ENSSSCG00000010461	-0.777562
ENSSSCG00000002305	ENSSSCG00000011350	0.715673
ENSSSCG00000002305	ENSSSCG00000011401	0.748412
ENSSSCG00000002305	ENSSSCG00000012241	0.722518
ENSSSCG00000002305	ENSSSCG00000012941	0.744652
ENSSSCG00000002305	ENSSSCG00000013113	0.715127
ENSSSCG00000002305	ENSSSCG00000015283	0.792073
ENSSSCG00000002305	ENSSSCG00000015334	-0.763292
ENSSSCG00000002305	ENSSSCG00000016792	-0.700055
ENSSSCG00000002305	ENSSSCG00000017391	0.726293
ENSSSCG00000002305	ENSSSCG00000017986	-0.712655
ENSSSCG00000002305	ENSSSCG00000022687	0.729732
ENSSSCG00000002305	ENSSSCG00000023714	0.777187
ENSSSCG00000002305	ENSSSCG00000026741	0.776006
ENSSSCG00000002305	ENSSSCG00000029687	0.800621
ENSSSCG00000002305	ENSSSCG00000029838	0.704687
ENSSSCG00000002305	ENSSSCG00000030277	0.716419
ENSSSCG00000002305	ENSSSCG00000031728	-0.715788
ENSSSCG00000002305	ENSSSCG00000032835	0.709013
ENSSSCG00000002305	ENSSSCG00000033196	0.720748
ENSSSCG00000002305	ENSSSCG00000036030	0.750458
ENSSSCG00000002305	ENSSSCG00000037292	0.759344
ENSSSCG00000002305	ENSSSCG00000038763	0.72951
ENSSSCG00000002305	ENSSSCG00000040334	0.701947
ENSSSCG00000002305	ENSSSCG00000004332	-0.722579
ENSSSCG00000002305	ENSSSCG00000007958	0.74187
ENSSSCG00000002305	ENSSSCG00000010219	-0.746767
ENSSSCG00000002305	ENSSSCG00000035537	-0.734927
ENSSSCG00000002305	ENSSSCG00000038631	0.771266
ENSSSCG00000002315	ENSSSCG00000004347	0.808796
ENSSSCG00000002315	ENSSSCG00000005288	0.706665
ENSSSCG00000002315	ENSSSCG00000006218	0.801014
ENSSSCG00000002315	ENSSSCG00000006231	0.740495
ENSSSCG00000002315	ENSSSCG00000006340	0.73462
ENSSSCG00000002315	ENSSSCG00000007465	0.769619
ENSSSCG00000002315	ENSSSCG00000008162	0.825429
ENSSSCG00000002315	ENSSSCG00000009464	0.793385
ENSSSCG00000002315	ENSSSCG00000010210	0.891366
ENSSSCG00000002315	ENSSSCG00000011496	0.737022
ENSSSCG00000002315	ENSSSCG00000012663	0.764222
ENSSSCG00000002315	ENSSSCG00000014132	0.759585
ENSSSCG00000002315	ENSSSCG00000014156	0.83548
ENSSSCG00000002315	ENSSSCG00000014168	0.71862
ENSSSCG00000002315	ENSSSCG00000015774	0.75679
ENSSSCG00000002315	ENSSSCG00000015814	0.749282
ENSSSCG00000002315	ENSSSCG00000015872	0.886485
ENSSSCG00000002315	ENSSSCG00000016068	0.770773
ENSSSCG00000002315	ENSSSCG00000016134	0.792764
ENSSSCG00000002315	ENSSSCG00000016606	0.707255
ENSSSCG00000002315	ENSSSCG00000017137	-0.773023
ENSSSCG00000002315	ENSSSCG00000017274	0.701124
ENSSSCG00000002315	ENSSSCG00000023105	0.736932
ENSSSCG00000002315	ENSSSCG00000024960	0.753508
ENSSSCG00000002315	ENSSSCG00000027105	0.744653
ENSSSCG00000002315	ENSSSCG00000028277	0.870052
ENSSSCG00000002315	ENSSSCG00000028878	-0.739329
ENSSSCG00000002315	ENSSSCG00000031866	0.723983
ENSSSCG00000002315	ENSSSCG00000032877	0.723086
ENSSSCG00000002315	ENSSSCG00000036331	0.853261
ENSSSCG00000002315	ENSSSCG00000038132	0.70506
ENSSSCG00000002315	ENSSSCG00000038423	0.73277
ENSSSCG00000002315	ENSSSCG00000004387	0.841681
ENSSSCG00000002315	ENSSSCG00000006725	0.728706
ENSSSCG00000002315	ENSSSCG00000007484	0.723375
ENSSSCG00000002315	ENSSSCG00000011201	0.726709
ENSSSCG00000002315	ENSSSCG00000011594	0.70517
ENSSSCG00000002315	ENSSSCG00000011810	0.718321
ENSSSCG00000002315	ENSSSCG00000016057	0.704422
ENSSSCG00000002315	ENSSSCG00000021646	0.808301
ENSSSCG00000002315	ENSSSCG00000022760	0.734079
ENSSSCG00000002315	ENSSSCG00000030095	0.706017
ENSSSCG00000002392	ENSSSCG00000002806	0.798649
ENSSSCG00000002392	ENSSSCG00000002812	0.735758
ENSSSCG00000002392	ENSSSCG00000003369	0.870687
ENSSSCG00000002392	ENSSSCG00000003428	0.776905
ENSSSCG00000002392	ENSSSCG00000003527	0.739348
ENSSSCG00000002392	ENSSSCG00000003549	0.712068
ENSSSCG00000002392	ENSSSCG00000003579	0.775918
ENSSSCG00000002392	ENSSSCG00000004154	0.762356
ENSSSCG00000002392	ENSSSCG00000004399	0.830747
ENSSSCG00000002392	ENSSSCG00000004929	0.772569
ENSSSCG00000002392	ENSSSCG00000004954	0.72508
ENSSSCG00000002392	ENSSSCG00000005288	-0.810156
ENSSSCG00000002392	ENSSSCG00000005301	0.74928
ENSSSCG00000002392	ENSSSCG00000005501	0.874438
ENSSSCG00000002392	ENSSSCG00000005631	-0.729049
ENSSSCG00000002392	ENSSSCG00000005648	0.725325
ENSSSCG00000002392	ENSSSCG00000005981	-0.751943
ENSSSCG00000002392	ENSSSCG00000006290	-0.779027
ENSSSCG00000002392	ENSSSCG00000006340	-0.708662
ENSSSCG00000002392	ENSSSCG00000006698	0.823827
ENSSSCG00000002392	ENSSSCG00000006740	0.868987
ENSSSCG00000002392	ENSSSCG00000006893	0.818108
ENSSSCG00000002392	ENSSSCG00000007317	0.798564
ENSSSCG00000002392	ENSSSCG00000007465	-0.707678
ENSSSCG00000002392	ENSSSCG00000007993	0.823667
ENSSSCG00000002392	ENSSSCG00000008349	0.843294
ENSSSCG00000002392	ENSSSCG00000009029	-0.725884
ENSSSCG00000002392	ENSSSCG00000009605	0.828789
ENSSSCG00000002392	ENSSSCG00000009801	0.802579
ENSSSCG00000002392	ENSSSCG00000009807	0.700076
ENSSSCG00000002392	ENSSSCG00000010118	0.831871
ENSSSCG00000002392	ENSSSCG00000010517	0.700625
ENSSSCG00000002392	ENSSSCG00000010529	0.71199
ENSSSCG00000002392	ENSSSCG00000010626	-0.731931
ENSSSCG00000002392	ENSSSCG00000010992	0.720301
ENSSSCG00000002392	ENSSSCG00000011075	-0.734774
ENSSSCG00000002392	ENSSSCG00000011199	-0.789234
ENSSSCG00000002392	ENSSSCG00000011350	0.734337
ENSSSCG00000002392	ENSSSCG00000011379	0.746084
ENSSSCG00000002392	ENSSSCG00000011401	0.736851
ENSSSCG00000002392	ENSSSCG00000011670	0.773189
ENSSSCG00000002392	ENSSSCG00000011849	0.792784
ENSSSCG00000002392	ENSSSCG00000012241	0.807126
ENSSSCG00000002392	ENSSSCG00000012361	0.808102
ENSSSCG00000002392	ENSSSCG00000012941	0.701114
ENSSSCG00000002392	ENSSSCG00000012966	0.748737
ENSSSCG00000002392	ENSSSCG00000013110	0.759209
ENSSSCG00000002392	ENSSSCG00000013113	0.723265
ENSSSCG00000002392	ENSSSCG00000013178	0.707479
ENSSSCG00000002392	ENSSSCG00000013292	0.793298
ENSSSCG00000002392	ENSSSCG00000013667	0.731551
ENSSSCG00000002392	ENSSSCG00000014132	-0.721554
ENSSSCG00000002392	ENSSSCG00000014156	-0.73022
ENSSSCG00000002392	ENSSSCG00000014875	0.76659
ENSSSCG00000002392	ENSSSCG00000015242	0.795028
ENSSSCG00000002392	ENSSSCG00000015283	0.844196
ENSSSCG00000002392	ENSSSCG00000015334	-0.807842
ENSSSCG00000002392	ENSSSCG00000015613	0.734094
ENSSSCG00000002392	ENSSSCG00000016068	-0.704368
ENSSSCG00000002392	ENSSSCG00000016792	-0.780197
ENSSSCG00000002392	ENSSSCG00000017137	0.749062
ENSSSCG00000002392	ENSSSCG00000017195	0.742959
ENSSSCG00000002392	ENSSSCG00000017254	-0.708881
ENSSSCG00000002392	ENSSSCG00000017260	0.707022
ENSSSCG00000002392	ENSSSCG00000017274	-0.755948
ENSSSCG00000002392	ENSSSCG00000017391	0.863294
ENSSSCG00000002392	ENSSSCG00000017414	0.845287
ENSSSCG00000002392	ENSSSCG00000017518	0.802272
ENSSSCG00000002392	ENSSSCG00000017528	0.776856
ENSSSCG00000002392	ENSSSCG00000017573	0.83861
ENSSSCG00000002392	ENSSSCG00000017584	0.834671
ENSSSCG00000002392	ENSSSCG00000017885	0.808748
ENSSSCG00000002392	ENSSSCG00000017986	-0.836541
ENSSSCG00000002392	ENSSSCG00000021436	0.754025
ENSSSCG00000002392	ENSSSCG00000021638	0.878708
ENSSSCG00000002392	ENSSSCG00000022347	0.724282
ENSSSCG00000002392	ENSSSCG00000022687	0.920355
ENSSSCG00000002392	ENSSSCG00000023105	-0.717314
ENSSSCG00000002392	ENSSSCG00000023714	0.769039
ENSSSCG00000002392	ENSSSCG00000025194	-0.701066
ENSSSCG00000002392	ENSSSCG00000025448	0.717861
ENSSSCG00000002392	ENSSSCG00000025638	0.750876
ENSSSCG00000002392	ENSSSCG00000025647	0.775441
ENSSSCG00000002392	ENSSSCG00000025943	0.714289
ENSSSCG00000002392	ENSSSCG00000026741	0.805519
ENSSSCG00000002392	ENSSSCG00000027646	-0.745187
ENSSSCG00000002392	ENSSSCG00000027684	-0.754364
ENSSSCG00000002392	ENSSSCG00000028878	0.735225
ENSSSCG00000002392	ENSSSCG00000029275	-0.803295
ENSSSCG00000002392	ENSSSCG00000029507	-0.720677
ENSSSCG00000002392	ENSSSCG00000029687	0.738664
ENSSSCG00000002392	ENSSSCG00000029711	0.805051
ENSSSCG00000002392	ENSSSCG00000029838	0.872455
ENSSSCG00000002392	ENSSSCG00000030268	-0.701803
ENSSSCG00000002392	ENSSSCG00000031159	0.760555
ENSSSCG00000002392	ENSSSCG00000031420	0.722692
ENSSSCG00000002392	ENSSSCG00000031728	-0.838938
ENSSSCG00000002392	ENSSSCG00000032094	-0.706849
ENSSSCG00000002392	ENSSSCG00000032366	0.728405
ENSSSCG00000002392	ENSSSCG00000032728	0.758602
ENSSSCG00000002392	ENSSSCG00000033196	0.777265
ENSSSCG00000002392	ENSSSCG00000035518	0.775915
ENSSSCG00000002392	ENSSSCG00000036030	0.89181
ENSSSCG00000002392	ENSSSCG00000037501	0.703181
ENSSSCG00000002392	ENSSSCG00000037520	0.723768
ENSSSCG00000002392	ENSSSCG00000038038	0.848016
ENSSSCG00000002392	ENSSSCG00000038763	0.713147
ENSSSCG00000002392	ENSSSCG00000038967	0.846572
ENSSSCG00000002392	ENSSSCG00000039419	-0.727648
ENSSSCG00000002392	ENSSSCG00000040334	0.857542
ENSSSCG00000002392	ENSSSCG00000040559	0.702318
ENSSSCG00000002392	ENSSSCG00000003407	0.777589
ENSSSCG00000002392	ENSSSCG00000004138	-0.775243
ENSSSCG00000002392	ENSSSCG00000004332	-0.805141
ENSSSCG00000002392	ENSSSCG00000005385	-0.850364
ENSSSCG00000002392	ENSSSCG00000008171	0.754994
ENSSSCG00000002392	ENSSSCG00000010219	-0.806312
ENSSSCG00000002392	ENSSSCG00000012287	0.730311
ENSSSCG00000002392	ENSSSCG00000013375	0.766834
ENSSSCG00000002392	ENSSSCG00000013501	0.750304
ENSSSCG00000002392	ENSSSCG00000013873	0.737899
ENSSSCG00000002392	ENSSSCG00000015595	-0.704079
ENSSSCG00000002392	ENSSSCG00000015715	0.897828
ENSSSCG00000002392	ENSSSCG00000015982	0.719484
ENSSSCG00000002392	ENSSSCG00000015986	0.7278
ENSSSCG00000002392	ENSSSCG00000017251	-0.701957
ENSSSCG00000002392	ENSSSCG00000017475	0.820481
ENSSSCG00000002392	ENSSSCG00000017950	0.743645
ENSSSCG00000002392	ENSSSCG00000023653	0.846043
ENSSSCG00000002392	ENSSSCG00000026103	0.745046
ENSSSCG00000002392	ENSSSCG00000030165	-0.740989
ENSSSCG00000002392	ENSSSCG00000034654	0.759485
ENSSSCG00000002392	ENSSSCG00000035537	-0.74639
ENSSSCG00000002392	ENSSSCG00000036340	0.725087
ENSSSCG00000002392	ENSSSCG00000036742	-0.73547
ENSSSCG00000002392	ENSSSCG00000037970	0.864437
ENSSSCG00000002412	ENSSSCG00000002806	0.743717
ENSSSCG00000002412	ENSSSCG00000002812	0.822477
ENSSSCG00000002412	ENSSSCG00000003369	0.773503
ENSSSCG00000002412	ENSSSCG00000003428	0.760001
ENSSSCG00000002412	ENSSSCG00000003549	0.85686
ENSSSCG00000002412	ENSSSCG00000004154	0.76047
ENSSSCG00000002412	ENSSSCG00000004789	-0.712799
ENSSSCG00000002412	ENSSSCG00000004954	0.773314
ENSSSCG00000002412	ENSSSCG00000005301	0.705381
ENSSSCG00000002412	ENSSSCG00000005303	0.725246
ENSSSCG00000002412	ENSSSCG00000005501	0.819756
ENSSSCG00000002412	ENSSSCG00000005648	0.82678
ENSSSCG00000002412	ENSSSCG00000005669	0.857629
ENSSSCG00000002412	ENSSSCG00000006277	-0.745323
ENSSSCG00000002412	ENSSSCG00000006290	-0.794476
ENSSSCG00000002412	ENSSSCG00000006698	0.879432
ENSSSCG00000002412	ENSSSCG00000007317	0.908667
ENSSSCG00000002412	ENSSSCG00000007350	0.722146
ENSSSCG00000002412	ENSSSCG00000007993	0.757965
ENSSSCG00000002412	ENSSSCG00000008132	0.80177
ENSSSCG00000002412	ENSSSCG00000008349	0.795181
ENSSSCG00000002412	ENSSSCG00000009605	0.74291
ENSSSCG00000002412	ENSSSCG00000009755	0.703579
ENSSSCG00000002412	ENSSSCG00000009808	0.711487
ENSSSCG00000002412	ENSSSCG00000010118	0.864244
ENSSSCG00000002412	ENSSSCG00000010330	0.862866
ENSSSCG00000002412	ENSSSCG00000010537	0.823534
ENSSSCG00000002412	ENSSSCG00000010822	0.82872
ENSSSCG00000002412	ENSSSCG00000011199	-0.704056
[truncated: 19,741 more rows]
