# Supplementary material for: Co-expression network analysis predicts a key role of microRNAs in the adaptation of the porcine skeletal muscle to nutrient supply
Source: J Anim Sci Biotechnol. 2020 Jan 17;11:10. doi: 10.1186/s40104-019-0412-z (PMC6966835; doi:10.1186/s40104-019-0412-z)
Supplement: Supplementary file 8 — Additional file 8: Table S8. Estimated Hub scores (K) values for genes differentially expressed in the AL-T0/AL-T1 and AL-T0/AL-T2 contrasts. [file 40104_2019_412_MOESM8_ESM.xlsx]

## Sheet: Hub_score_T0T1
Table S8: mRNA Hub score (K) for genes differentially expressed in the AL-T0/AL-T1 contrast
ID	gene	K
ENSSSCG00000027017	NR1D2	3.0387
ENSSSCG00000012029	BACH1	3.01181
ENSSSCG00000017475	RARA	3.01181
ENSSSCG00000015235	ETS1	2.90424
ENSSSCG00000034395	CREB1	2.90424
ENSSSCG00000032372	ZFP90	2.82357
ENSSSCG00000014168	ELL2	2.68911
ENSSSCG00000012850	DEAF1	2.66222
ENSSSCG00000014319	SMAD5	2.63533
ENSSSCG00000037762	TBX1	2.60844
ENSSSCG00000005096	HIF1A	2.58155
ENSSSCG00000006970	DLC1	2.58155
ENSSSCG00000006346	ATF6	2.55466
ENSSSCG00000021646	KLF9	2.55466
ENSSSCG00000005318	CREB3	2.52777
ENSSSCG00000040959	ZNF131	2.52777
ENSSSCG00000001474	RXRB	2.50087
ENSSSCG00000005648	SLC27A4	2.47398
ENSSSCG00000012608	ZBTB33	2.44709
ENSSSCG00000036546	RNF141	2.44709
ENSSSCG00000003030	CIC	2.4202
ENSSSCG00000025321	MAZ	2.4202
ENSSSCG00000038253	ZNF326	2.4202
ENSSSCG00000013873	NR2F6	2.39331
ENSSSCG00000015393	DMTF1	2.39331
ENSSSCG00000038076	ATF2	2.39331
ENSSSCG00000002885	USF2	2.36642
ENSSSCG00000005917	HSF1	2.36642
ENSSSCG00000023357	REST	2.36642
ENSSSCG00000040107	GMEB2	2.36642
ENSSSCG00000004739	MGA	2.31264
ENSSSCG00000008553	PREB	2.31264
ENSSSCG00000011951	NFKBIZ	2.31264
ENSSSCG00000015982	HOXD9	2.31264
ENSSSCG00000002769	THAP11	2.28575
ENSSSCG00000021343	ZEB2	2.28575
ENSSSCG00000024970	ETV3	2.28575
ENSSSCG00000029998	KLF7	2.28575
ENSSSCG00000006468	HDGF	2.25885
ENSSSCG00000017516	SP2	2.25885
ENSSSCG00000029920	ELF2	2.25885
ENSSSCG00000007311	PHF20	2.23196
ENSSSCG00000012287	TFE3	2.23196
ENSSSCG00000013028	ESRRA	2.23196
ENSSSCG00000025568	TEAD2	2.23196
ENSSSCG00000035952	TGFB1I1	2.20507
ENSSSCG00000036308	PGS1	2.20507
ENSSSCG00000008909	CLOCK	2.17818
ENSSSCG00000009655	EBF2	2.17818
ENSSSCG00000038739	MYPOP	2.17818
ENSSSCG00000010224	EGR2	2.15129
ENSSSCG00000022343	ENO1	2.15129
ENSSSCG00000000702	ZNF384	2.1244
ENSSSCG00000006898	MTF2	2.1244
ENSSSCG00000015987	NFE2L2	2.1244
ENSSSCG00000017125	FOXK2	2.1244
ENSSSCG00000017604	HLF	2.09751
ENSSSCG00000030947	ZFAT	2.09751
ENSSSCG00000001661	SRF	2.07062
ENSSSCG00000006155	ZBTB10	2.07062
ENSSSCG00000011025	ZEB1	2.07062
ENSSSCG00000017623	VEZF1	2.07062
ENSSSCG00000040185	TFAM	2.07062
ENSSSCG00000004600	TCF12	2.04373
ENSSSCG00000011496	ADAMTS9	2.04373
ENSSSCG00000038220	RXRA	2.04373
ENSSSCG00000002867	CEBPG	2.01683
ENSSSCG00000030484	AHR	2.01683
ENSSSCG00000032242	HMGA1	2.01683
ENSSSCG00000040728	EYA1	2.01683
ENSSSCG00000011514	MITF	1.98994
ENSSSCG00000017414	KAT2A	1.98994
ENSSSCG00000026103	ZBTB17	1.98994
ENSSSCG00000032320	TCIM	1.98994
ENSSSCG00000035969	THRA	1.98994
ENSSSCG00000000258	RARG	1.96305
ENSSSCG00000002252	ARRDC4	1.96305
ENSSSCG00000004938	DENND4A	1.96305
ENSSSCG00000013764	RFX1	1.96305
ENSSSCG00000015357	MEOX2	1.93616
ENSSSCG00000001708	CDC5L	1.90927
ENSSSCG00000004576	RORA	1.90927
ENSSSCG00000006231	CHD7	1.90927
ENSSSCG00000015211	PKNOX2	1.90927
ENSSSCG00000017397	MLX	1.90927
ENSSSCG00000000902	NR2C1	1.88238
ENSSSCG00000003976	NFYC	1.88238
ENSSSCG00000005437		1.88238
ENSSSCG00000033175	SASH1	1.88238
ENSSSCG00000004127	PLAGL1	1.85549
ENSSSCG00000016824	RAI14	1.85549
ENSSSCG00000031562	MZF1	1.85549
ENSSSCG00000009865	TBX3	1.8286
ENSSSCG00000014149	MEF2C	1.8286
ENSSSCG00000015962	SP3	1.8286
ENSSSCG00000022728	HOXC10	1.8286
ENSSSCG00000001619	FOXP4	1.80171
ENSSSCG00000011125	GATA3	1.80171
ENSSSCG00000013241	NR1H3	1.80171
ENSSSCG00000000504	PTPRB	1.77481
ENSSSCG00000015519	RASAL2	1.77481
ENSSSCG00000016898		1.77481
ENSSSCG00000014156	ARRDC3	1.74792
ENSSSCG00000017528	SNX11	1.74792
ENSSSCG00000000736	TEAD4	1.72103
ENSSSCG00000006482	MEF2D	1.72103
ENSSSCG00000031744		1.72103
ENSSSCG00000034191	SOX6	1.72103
ENSSSCG00000036933	NR1D1	1.72103
ENSSSCG00000038149	KCNE4	1.72103
ENSSSCG00000008099	ZC3H8	1.69414
ENSSSCG00000004215	KIAA0408	1.66725
ENSSSCG00000005604	PBX3	1.66725
ENSSSCG00000010455	SLC16A12	1.66725
ENSSSCG00000016138	ATF1	1.66725
ENSSSCG00000003178	IRF3	1.64036
ENSSSCG00000008374	B3GNT2	1.64036
ENSSSCG00000013178	ZDHHC5	1.64036
ENSSSCG00000000587	AEBP2	1.61347
ENSSSCG00000003211		1.61347
ENSSSCG00000006018	TRPS1	1.61347
ENSSSCG00000012026	ADAMTS1	1.61347
ENSSSCG00000012981	RELA	1.61347
ENSSSCG00000017406	STAT5B	1.61347
ENSSSCG00000023229	ETV5	1.61347
ENSSSCG00000031503	PRRX1	1.61347
ENSSSCG00000035253	MAFG	1.61347
ENSSSCG00000038500	TRIB1	1.61347
ENSSSCG00000007681	CUX1	1.58658
ENSSSCG00000015814		1.58658
ENSSSCG00000004290	TBX18	1.55969
ENSSSCG00000011858	ZNF148	1.55969
ENSSSCG00000025238	SHOX2	1.55969
ENSSSCG00000011075	KIAA1217	1.53279
ENSSSCG00000024672	KLF16	1.53279
ENSSSCG00000035037		1.53279
ENSSSCG00000038132	IRF2BP2	1.53279
ENSSSCG00000007484	ZNF217	1.5059
ENSSSCG00000010580	NFKB2	1.5059
ENSSSCG00000022387	TBPL1	1.5059
ENSSSCG00000025698	SERPINE1	1.5059
ENSSSCG00000005089	SIX4	1.47901
ENSSSCG00000007559	MAFK	1.47901
ENSSSCG00000008687	MXD4	1.47901
ENSSSCG00000020853	BTBD3	1.47901
ENSSSCG00000023724	ZBTB1	1.47901
ENSSSCG00000025182	ELK4	1.47901
ENSSSCG00000032080	ZNF35	1.47901
ENSSSCG00000003407	CASZ1	1.45212
ENSSSCG00000004524	SMAD4	1.45212
ENSSSCG00000023105	NET1	1.45212
ENSSSCG00000028104	HOXC11	1.45212
ENSSSCG00000001921	NEO1	1.42523
ENSSSCG00000002254	NR2F2	1.39834
ENSSSCG00000010911	ZNF281	1.39834
ENSSSCG00000001892	SCAMP2	1.37145
ENSSSCG00000002741	ZNF821	1.37145
ENSSSCG00000007767	ZNF668	1.37145
ENSSSCG00000009794	MLXIP	1.37145
ENSSSCG00000013399	TEAD1	1.37145
ENSSSCG00000023565	IKZF5	1.37145
ENSSSCG00000039580	FOXJ2	1.37145
ENSSSCG00000001621	TFEB	1.34456
ENSSSCG00000011076	OTUD1	1.34456
ENSSSCG00000012853	IRF7	1.34456
ENSSSCG00000015378	SP4	1.34456
ENSSSCG00000032527	FOSL2	1.34456
ENSSSCG00000008388	REL	1.31767
ENSSSCG00000011743	MECOM	1.31767
ENSSSCG00000022155	RBPJ	1.31767
ENSSSCG00000008446	SIX2	1.29077
ENSSSCG00000017986	NDEL1	1.29077
ENSSSCG00000035212	KLF6	1.29077
ENSSSCG00000038313	ZNF219	1.29077
ENSSSCG00000005669	MIGA2	1.26388
ENSSSCG00000006277	SPIDR	1.26388
ENSSSCG00000028606	ZBTB7B	1.26388
ENSSSCG00000038911	KLF2	1.26388
ENSSSCG00000001430	ATF6B	1.23699
ENSSSCG00000004789	THBS1	1.23699
ENSSSCG00000015037	IL18	1.23699
ENSSSCG00000016164	IKZF2	1.23699
ENSSSCG00000028771	MEF2A	1.23699
ENSSSCG00000031262	TXNIP	1.23699
ENSSSCG00000001156	ZNF322	1.2101
ENSSSCG00000001539	PPARD	1.2101
ENSSSCG00000015871	NR4A2	1.2101
ENSSSCG00000017983		1.2101
ENSSSCG00000036033	THRB	1.2101
ENSSSCG00000037647	TFDP2	1.2101
ENSSSCG00000038956	HEYL	1.2101
ENSSSCG00000020954	PCGF6	1.18321
ENSSSCG00000028056	ZFP36	1.18321
ENSSSCG00000038443	ZNF639	1.18321
ENSSSCG00000028997		1.12943
ENSSSCG00000036555	PRDM8	1.12943
ENSSSCG00000007958	ZNF174	1.10254
ENSSSCG00000016701	HOXA7	1.10254
ENSSSCG00000016057	STAT1	1.07564
ENSSSCG00000002283	FUT8	1.04875
ENSSSCG00000004505	SMAD2	1.04875
ENSSSCG00000011810	BCL6	1.04875
ENSSSCG00000013501	CREB3L3	1.04875
ENSSSCG00000017607	TMEM100	1.04875
ENSSSCG00000017727	TMEM98	1.04875
ENSSSCG00000022318	ERG	1.04875
ENSSSCG00000036787	APOLD1	1.04875
ENSSSCG00000001438	PBX2	1.02186
ENSSSCG00000004163	BCLAF1	1.02186
ENSSSCG00000006023	SYBU	1.02186
ENSSSCG00000015568	RNF2	1.02186
ENSSSCG00000022760	HNRNPK	1.02186
ENSSSCG00000026533	MYF6	1.02186
ENSSSCG00000037201	MPV17	1.02186
ENSSSCG00000007576	FOXK1	0.994972
ENSSSCG00000017402	STAT5A	0.994972
ENSSSCG00000022925		0.994972
ENSSSCG00000035152	TEF	0.994972
ENSSSCG00000006290	SLC19A2	0.96808
ENSSSCG00000006560	CREB3L4	0.96808
ENSSSCG00000008334	MXD1	0.96808
ENSSSCG00000010464	PPP1R3C	0.96808
ENSSSCG00000038594	SDC4	0.96808
ENSSSCG00000038948	ETS2	0.96808
ENSSSCG00000002388	ESRRB	0.941189
ENSSSCG00000004535	TCF4	0.941189
ENSSSCG00000014401	NR3C1	0.941189
ENSSSCG00000002392	IRF2BPL	0.914298
ENSSSCG00000009152	SGMS2	0.914298
ENSSSCG00000011212	RARB	0.914298
ENSSSCG00000015283	PIK3C2B	0.914298
ENSSSCG00000016703	HOXA5	0.914298
ENSSSCG00000017885	SMTNL2	0.914298
ENSSSCG00000035673	HBP1	0.914298
ENSSSCG00000009440	ELF1	0.887407
ENSSSCG00000010219	ARID5B	0.887407
ENSSSCG00000011594	NR2C2	0.887407
ENSSSCG00000015112	HINFP	0.887407
ENSSSCG00000015541	IER5	0.887407
ENSSSCG00000035281	ZNF292	0.887407
ENSSSCG00000004387	FOXO3	0.860516
ENSSSCG00000012620	NKRF	0.860516
ENSSSCG00000013351	NAV2	0.860516
ENSSSCG00000017950	TP53	0.860516
ENSSSCG00000037766	NR3C2	0.860516
ENSSSCG00000007993	CAPN15	0.833625
ENSSSCG00000013742	NFIX	0.833625
ENSSSCG00000021638	NEU3	0.833625
ENSSSCG00000008443	EPAS1	0.806734
ENSSSCG00000015237	FLI1	0.806734
ENSSSCG00000015550	RGS16	0.806734
ENSSSCG00000017744	SUZ12	0.806734
ENSSSCG00000021436	DFFB	0.806734
ENSSSCG00000036742	KLF15	0.806734
ENSSSCG00000038727	GDNF	0.806734
ENSSSCG00000005965	MYC	0.779843
ENSSSCG00000023133	OSBPL6	0.779843
ENSSSCG00000026092	SREBF2	0.779843
ENSSSCG00000032367	CEBPD	0.779843
ENSSSCG00000039419	SLCO4A1	0.779843
ENSSSCG00000034494	MARS2	0.752951
ENSSSCG00000002755	NFAT5	0.72606
ENSSSCG00000029507	RASGEF1B	0.72606
ENSSSCG00000034207	CEBPB	0.72606
ENSSSCG00000040366	ADAMTSL1	0.72606
ENSSSCG00000004490	SETBP1	0.699169
ENSSSCG00000006625	RFX5	0.699169
ENSSSCG00000017046	EBF1	0.699169
ENSSSCG00000025777	ESR1	0.699169
ENSSSCG00000031321	NR4A1	0.699169
ENSSSCG00000036030	INKA2	0.699169
ENSSSCG00000036537	NFIC	0.699169
ENSSSCG00000001049	HIVEP1	0.672278
ENSSSCG00000001347	PPP1R10	0.672278
ENSSSCG00000004138	HIVEP2	0.672278
ENSSSCG00000006331	PBX1	0.672278
ENSSSCG00000011746	SKIL	0.672278
ENSSSCG00000012110	MID1	0.672278
ENSSSCG00000017379	ETV4	0.672278
ENSSSCG00000022256	DEPP1	0.672278
ENSSSCG00000005636	SLC25A25	0.645387
ENSSSCG00000006698	BCL9	0.645387
ENSSSCG00000008493	CEBPZ	0.645387
ENSSSCG00000023660	PARP1	0.645387
ENSSSCG00000034654	MYOG	0.645387
ENSSSCG00000000084	ATF4	0.618496
ENSSSCG00000011264	CSRNP1	0.618496
ENSSSCG00000013263	CREB3L1	0.618496
ENSSSCG00000017376	MEOX1	0.618496
ENSSSCG00000037970	SOX8	0.618496
ENSSSCG00000040751	DDIT3	0.618496
ENSSSCG00000002383	FOS	0.591605
ENSSSCG00000002787	E2F4	0.591605
ENSSSCG00000004856	NFATC1	0.591605
ENSSSCG00000009370	FOXO1	0.591605
ENSSSCG00000009682	HMBOX1	0.591605
ENSSSCG00000010626	RBM20	0.591605
ENSSSCG00000021273		0.591605
ENSSSCG00000022070	ZNF143	0.591605
ENSSSCG00000025717	HIC1	0.591605
ENSSSCG00000031154	ACKR2	0.591605
ENSSSCG00000038374	CIART	0.591605
ENSSSCG00000038872	GMEB1	0.591605
ENSSSCG00000000633	YBX3	0.564714
ENSSSCG00000001611	NFYA	0.564714
ENSSSCG00000005087	SIX1	0.564714
ENSSSCG00000008349	CNRIP1	0.564714
ENSSSCG00000014251		0.564714
ENSSSCG00000029571	AVIL	0.564714
ENSSSCG00000035537	RUNX1	0.564714
ENSSSCG00000003264	CNOT3	0.537822
ENSSSCG00000015595	ATF3	0.537822
ENSSSCG00000023674	SON	0.537822
ENSSSCG00000028322	BTG2	0.537822
ENSSSCG00000039568	SNAI2	0.537822
ENSSSCG00000000078	TNRC6B	0.510931
ENSSSCG00000001061	JARID2	0.510931
ENSSSCG00000006646	ARNT	0.510931
ENSSSCG00000010814	ESRRG	0.510931
ENSSSCG00000030095	ZBTB16	0.510931
ENSSSCG00000008241	TCF7L1	0.48404
ENSSSCG00000009216	SPP1	0.48404
ENSSSCG00000013375	MYOD1	0.48404
ENSSSCG00000024253	CTCF	0.48404
ENSSSCG00000032154	ERF	0.48404
ENSSSCG00000032381	LITAF	0.48404
ENSSSCG00000016690	CREB5	0.457149
ENSSSCG00000028190	HOMEZ	0.457149
ENSSSCG00000034708	PITX2	0.457149
ENSSSCG00000036340	ZBTB5	0.457149
ENSSSCG00000000396	STAT2	0.430258
ENSSSCG00000006359	ADAMTS4	0.430258
ENSSSCG00000017546	ZNF652	0.430258
ENSSSCG00000023806	LRRN1	0.430258
ENSSSCG00000026894	NFE2L3	0.430258
ENSSSCG00000037516	MTF1	0.430258
ENSSSCG00000038164	RAI1	0.430258
ENSSSCG00000003107	ARHGAP35	0.403367
ENSSSCG00000005385	NR4A3	0.403367
ENSSSCG00000023031	TNNT2	0.403367
ENSSSCG00000030165	MAFF	0.403367
ENSSSCG00000036136	BHLHE40	0.403367
ENSSSCG00000037558	YY1	0.403367
ENSSSCG00000010517		0.376476
ENSSSCG00000011235	UBP1	0.376476
ENSSSCG00000014336	EGR1	0.376476
ENSSSCG00000016986	CREBRF	0.376476
ENSSSCG00000021586	ZHX2	0.376476
ENSSSCG00000027480	KLF10	0.376476
ENSSSCG00000029226	UBC	0.376476
ENSSSCG00000029578	NFATC3	0.376476
ENSSSCG00000030155	PHF10	0.376476
ENSSSCG00000001411	APOM	0.349585
ENSSSCG00000020801	ARX	0.349585
ENSSSCG00000023653	GLIS2	0.349585
ENSSSCG00000027056	ZNF350	0.349585
ENSSSCG00000034297	HES2	0.349585
ENSSSCG00000002838	ZNF423	0.322693
ENSSSCG00000006187	MSC	0.322693
ENSSSCG00000011451	ITIH3	0.322693
ENSSSCG00000021204	HOXA10	0.322693
ENSSSCG00000022687	NAA40	0.322693
ENSSSCG00000024152	ETV6	0.322693
ENSSSCG00000026006	KLF13	0.322693
ENSSSCG00000031616	FOSB	0.322693
ENSSSCG00000033626	SREBF1	0.322693
ENSSSCG00000039161	MEIS1	0.322693
ENSSSCG00000003201	ATF5	0.295802
ENSSSCG00000013753	IER2	0.295802
ENSSSCG00000035074	FOXO6	0.295802
ENSSSCG00000005672	PTPA	0.268911
ENSSSCG00000006940	CCN1	0.268911
ENSSSCG00000009605	GFRA2	0.268911
ENSSSCG00000009801	BCL7A	0.268911
ENSSSCG00000010027	PATZ1	0.268911
ENSSSCG00000010638	TCF7L2	0.268911
ENSSSCG00000016338	PER2	0.268911
ENSSSCG00000022322	BCL2L11	0.268911
ENSSSCG00000032171	TCF20	0.268911
ENSSSCG00000032644	HLX	0.268911
ENSSSCG00000005589	NR6A1	0.24202
ENSSSCG00000011133	PFKFB3	0.24202
ENSSSCG00000017403	STAT3	0.24202
ENSSSCG00000023894	AKNA	0.24202
ENSSSCG00000003148	DBP	0.215129
ENSSSCG00000004332	BACH2	0.215129
ENSSSCG00000007477	NFATC2	0.215129
ENSSSCG00000010994	NFX1	0.215129
ENSSSCG00000012967	FOSL1	0.215129
ENSSSCG00000013397	ARNTL	0.215129
ENSSSCG00000014915	EED	0.215129
ENSSSCG00000021359	CDC42EP3	0.215129
ENSSSCG00000023243	NFIA	0.215129
ENSSSCG00000023714	SLC31A2	0.215129
ENSSSCG00000023803	ELK3	0.215129
ENSSSCG00000024416	MYH13	0.215129
ENSSSCG00000032613	SNAI1	0.215129
ENSSSCG00000035403	RFX2	0.215129
ENSSSCG00000040178	E2F3	0.215129
ENSSSCG00000000272	SP1	0.188238
ENSSSCG00000002002	IRF9	0.188238
ENSSSCG00000009560	TFDP1	0.188238
ENSSSCG00000012399	FOXO4	0.188238
ENSSSCG00000016573	IRF5	0.188238
ENSSSCG00000024219	TIGAR	0.188238
ENSSSCG00000027060	TBX2	0.188238
ENSSSCG00000032144	ZNF140	0.188238
ENSSSCG00000006725	TBX15	0.161347
ENSSSCG00000009974	EWSR1	0.161347
ENSSSCG00000011618	GATA2	0.161347
ENSSSCG00000017525	NFE2L1	0.161347
ENSSSCG00000022693	LBX1	0.161347
ENSSSCG00000026161	E2F6	0.161347
ENSSSCG00000030672	ZNF692	0.161347
ENSSSCG00000033032	ZBTB14	0.161347
ENSSSCG00000034763	IRS2	0.161347
ENSSSCG00000037865	SOX18	0.161347
ENSSSCG00000040435	STAT6	0.161347
ENSSSCG00000001905	ARID3B	0.134456
ENSSSCG00000003233	ZNF175	0.134456
ENSSSCG00000004154	TNFAIP3	0.134456
ENSSSCG00000004238	HSF2	0.134456
ENSSSCG00000004399	SLC22A16	0.134456
ENSSSCG00000007117	GZF1	0.134456
ENSSSCG00000010456	PANK1	0.134456
ENSSSCG00000010757	EBF3	0.134456
ENSSSCG00000012656	ELF4	0.134456
ENSSSCG00000013437	TCF3	0.134456
ENSSSCG00000036314	HHEX	0.134456
ENSSSCG00000040349	HOXD8	0.134456
ENSSSCG00000004090	ZBTB2	0.107564
ENSSSCG00000004952	SMAD3	0.107564
ENSSSCG00000006371	USF1	0.107564
ENSSSCG00000007243	PLAGL2	0.107564
ENSSSCG00000009422	TSC22D1	0.107564
ENSSSCG00000010739	CTBP2	0.107564
ENSSSCG00000012279	ELK1	0.107564
ENSSSCG00000015733	GLI2	0.107564
ENSSSCG00000016566	NRF1	0.107564
ENSSSCG00000035895	JDP2	0.107564
ENSSSCG00000037267	MAX	0.107564
ENSSSCG00000038643	KLF11	0.107564
ENSSSCG00000038879	RELB	0.107564
ENSSSCG00000039867	UCK2	0.107564
ENSSSCG00000040145	SNAI3	0.107564
ENSSSCG00000001021	RREB1	0.0806734
ENSSSCG00000008047	E4F1	0.0806734
ENSSSCG00000011201	SATB1	0.0806734
ENSSSCG00000012371	AR	0.0806734
ENSSSCG00000014277	IRF1	0.0806734
ENSSSCG00000016520	CREB3L2	0.0806734
ENSSSCG00000016605	LMOD2	0.0806734
ENSSSCG00000017251	SOX9	0.0806734
ENSSSCG00000017927		0.0806734
ENSSSCG00000024428	CHRNA9	0.0806734
ENSSSCG00000025752	ZNF746	0.0806734
ENSSSCG00000001986	NFATC4	0.0537822
ENSSSCG00000002752	ZFHX3	0.0537822
ENSSSCG00000002906	ETV2	0.0537822
ENSSSCG00000004012	THBS2	0.0537822
ENSSSCG00000005190	NFIB	0.0537822
ENSSSCG00000005233	DMRT2	0.0537822
ENSSSCG00000008119	KCNIP3	0.0537822
ENSSSCG00000009966	MN1	0.0537822
ENSSSCG00000010578	PITX3	0.0537822
ENSSSCG00000013786	ZNF333	0.0537822
ENSSSCG00000015145	ZNF202	0.0537822
ENSSSCG00000030957	NFKB1	0.0537822
ENSSSCG00000032464	PURB	0.0537822
ENSSSCG00000033613	FOXS1	0.0537822
ENSSSCG00000035101	KLF5	0.0537822
ENSSSCG00000040607	MAF	0.0537822
ENSSSCG00000000937	MYF5	0.0268911
ENSSSCG00000001206	ZSCAN26	0.0268911
ENSSSCG00000007093	ZNF133	0.0268911
ENSSSCG00000009676	ZNF395	0.0268911
ENSSSCG00000011579	PPARG	0.0268911
ENSSSCG00000013751	NACC1	0.0268911
ENSSSCG00000015986	HOXD1	0.0268911
ENSSSCG00000016763	GLI3	0.0268911
ENSSSCG00000021657	SATB2	0.0268911
ENSSSCG00000025592	TP63	0.0268911
ENSSSCG00000026636	ZBTB4	0.0268911
ENSSSCG00000028552	BHLHE41	0.0268911
ENSSSCG00000029236	ZBTB7A	0.0268911
ENSSSCG00000029576	ZNF239	0.0268911
ENSSSCG00000031356	HES1	0.0268911
ENSSSCG00000032429	RAX2	0.0268911
ENSSSCG00000034774	TBX6	0.0268911
ENSSSCG00000034820	MAFA	0.0268911
ENSSSCG00000036756	ZNF496	0.0268911
ENSSSCG00000037663	PKNOX1	0.0268911

## Sheet: Hub_score_T0T2
Table S8: mRNA Hub score (K) for genes differentially expressed in the AL-T0/AL-T2 contrast
ID	gene	K
ENSSSCG00000001892	SCAMP2	3.25963
ENSSSCG00000012966	C11orf68	3.20843
ENSSSCG00000021638	NEU3	3.19136
ENSSSCG00000014168	ELL2	3.14016
ENSSSCG00000015334	PDK4	3.05483
ENSSSCG00000017986	NDEL1	2.9695
ENSSSCG00000012361	AMER1	2.95244
ENSSSCG00000005648	SLC27A4	2.9183
ENSSSCG00000025943	C6orf136	2.9183
ENSSSCG00000006290	SLC19A2	2.90124
ENSSSCG00000010118	HIRA	2.88417
ENSSSCG00000016068	HECW2	2.88417
ENSSSCG00000017584	PPP1R9B	2.86711
ENSSSCG00000015982	HOXD9	2.83297
ENSSSCG00000038967	NADK	2.83297
ENSSSCG00000006698	BCL9	2.81591
ENSSSCG00000013110	TMEM109	2.81591
ENSSSCG00000038038	SBK1	2.81591
ENSSSCG00000002283	FUT8	2.79884
ENSSSCG00000004332	BACH2	2.79884
ENSSSCG00000017528	SNX11	2.78177
ENSSSCG00000022687	NAA40	2.74764
ENSSSCG00000040334	CBX6	2.74764
ENSSSCG00000017885	SMTNL2	2.73058
ENSSSCG00000017414	KAT2A	2.66231
ENSSSCG00000017274	PITPNC1	2.64525
ENSSSCG00000010219	ARID5B	2.62818
ENSSSCG00000035212	KLF6	2.62818
ENSSSCG00000032366	MOB3A	2.61111
ENSSSCG00000011379	KLHDC8B	2.59405
ENSSSCG00000000571	ABCC9	2.57698
ENSSSCG00000011199	TBC1D5	2.57698
ENSSSCG00000023653	GLIS2	2.57698
ENSSSCG00000028045	MUL1	2.57698
ENSSSCG00000036340	ZBTB5	2.57698
ENSSSCG00000007317	DLGAP4	2.55992
ENSSSCG00000017518		2.54285
ENSSSCG00000028878	BCAR1	2.54285
ENSSSCG00000015715	EN1	2.50872
ENSSSCG00000027646	TIPARP	2.47458
ENSSSCG00000013501	CREB3L3	2.45752
ENSSSCG00000002769	THAP11	2.44045
ENSSSCG00000011951	NFKBIZ	2.44045
ENSSSCG00000002392	IRF2BPL	2.42339
ENSSSCG00000003428	MTHFR	2.42339
ENSSSCG00000005501	TRIM32	2.42339
ENSSSCG00000017950	TP53	2.42339
ENSSSCG00000012029	BACH1	2.38925
ENSSSCG00000014132		2.38925
ENSSSCG00000040445	RND3	2.38925
ENSSSCG00000015283	PIK3C2B	2.37219
ENSSSCG00000005669	MIGA2	2.33806
ENSSSCG00000007993	CAPN15	2.33806
ENSSSCG00000017573	XYLT2	2.33806
ENSSSCG00000025194	ZSWIM6	2.33806
ENSSSCG00000003369	ICMT	2.30392
ENSSSCG00000014156	ARRDC3	2.30392
ENSSSCG00000003407	CASZ1	2.28686
ENSSSCG00000007465	B4GALT5	2.26979
ENSSSCG00000006340	UAP1	2.25273
ENSSSCG00000021646	KLF9	2.25273
ENSSSCG00000012663	ENOX2	2.23566
ENSSSCG00000000695	IFFO1	2.21859
ENSSSCG00000006346	ATF6	2.21859
ENSSSCG00000025647	SLC35C1	2.21859
ENSSSCG00000032877		2.21859
ENSSSCG00000026103	ZBTB17	2.20153
ENSSSCG00000002812	KIFC3	2.18446
ENSSSCG00000015242	NFRKB	2.18446
ENSSSCG00000003549	LDLRAP1	2.1674
ENSSSCG00000011350	CCDC51	2.15033
ENSSSCG00000002412	STON2	2.13326
ENSSSCG00000009605	GFRA2	2.13326
ENSSSCG00000002252	ARRDC4	2.1162
ENSSSCG00000027105	TUBGCP5	2.1162
ENSSSCG00000032835	TMEM268	2.1162
ENSSSCG00000010822	BPNT1	2.09913
ENSSSCG00000005096	HIF1A	2.08206
ENSSSCG00000026741	TBCC	2.08206
ENSSSCG00000027017	NR1D2	2.08206
ENSSSCG00000004954	C15orf61	2.065
ENSSSCG00000040107	GMEB2	2.065
ENSSSCG00000001885	C15orf39	2.03087
ENSSSCG00000008349	CNRIP1	2.03087
ENSSSCG00000014875	CAPN5	2.03087
ENSSSCG00000015235	ETS1	2.03087
ENSSSCG00000006898	MTF2	2.0138
ENSSSCG00000008099	ZC3H8	2.0138
ENSSSCG00000013873	NR2F6	2.0138
ENSSSCG00000005301	FAM214B	1.99673
ENSSSCG00000024907	SDHAF1	1.99673
ENSSSCG00000036546	RNF141	1.99673
ENSSSCG00000015519	RASAL2	1.97967
ENSSSCG00000015814		1.97967
ENSSSCG00000000209	NCKAP5L	1.9626
ENSSSCG00000029711	ZNF518B	1.9626
ENSSSCG00000040559	ZNF691	1.9626
ENSSSCG00000006740	ATP1A1	1.94554
ENSSSCG00000017195	TRIM65	1.94554
ENSSSCG00000017475	RARA	1.94554
ENSSSCG00000029838	FZD2	1.94554
ENSSSCG00000029998	KLF7	1.94554
ENSSSCG00000014319	SMAD5	1.92847
ENSSSCG00000022837	TMUB2	1.92847
ENSSSCG00000024970	ETV3	1.9114
ENSSSCG00000036030	INKA2	1.9114
ENSSSCG00000006231	CHD7	1.89434
ENSSSCG00000017260	WIPI1	1.89434
ENSSSCG00000032094	DKK2	1.89434
ENSSSCG00000000902	NR2C1	1.87727
ENSSSCG00000033196	MYORG	1.87727
ENSSSCG00000000504	PTPRB	1.86021
ENSSSCG00000011810	BCL6	1.86021
ENSSSCG00000026446		1.86021
ENSSSCG00000030165	MAFF	1.86021
ENSSSCG00000001474	RXRB	1.84314
ENSSSCG00000001619	FOXP4	1.84314
ENSSSCG00000012287	TFE3	1.84314
ENSSSCG00000013178	ZDHHC5	1.84314
ENSSSCG00000017604	HLF	1.84314
ENSSSCG00000023357	REST	1.84314
ENSSSCG00000031420	SCO2	1.84314
ENSSSCG00000037647	TFDP2	1.84314
ENSSSCG00000025777	ESR1	1.82607
ENSSSCG00000010330	PPIF	1.80901
ENSSSCG00000025638	UBE2Z	1.80901
ENSSSCG00000005288	TLE4	1.77487
ENSSSCG00000010509	PIK3AP1	1.77487
ENSSSCG00000031728	ABRA	1.77487
ENSSSCG00000035537	RUNX1	1.77487
ENSSSCG00000007311	PHF20	1.75781
ENSSSCG00000012608	ZBTB33	1.75781
ENSSSCG00000015987	NFE2L2	1.75781
ENSSSCG00000040959	ZNF131	1.75781
ENSSSCG00000006155	ZBTB10	1.74074
ENSSSCG00000009464	COMMD6	1.74074
ENSSSCG00000015393	DMTF1	1.74074
ENSSSCG00000040185	TFAM	1.74074
ENSSSCG00000002806	MMP15	1.72368
ENSSSCG00000004938	DENND4A	1.72368
ENSSSCG00000005589	NR6A1	1.72368
ENSSSCG00000015357	MEOX2	1.72368
ENSSSCG00000038253	ZNF326	1.72368
ENSSSCG00000004138	HIVEP2	1.70661
ENSSSCG00000010992		1.70661
ENSSSCG00000016792	RETREG1	1.70661
ENSSSCG00000021343	ZEB2	1.70661
ENSSSCG00000029920	ELF2	1.70661
ENSSSCG00000039998	CLIC2	1.70661
ENSSSCG00000039419	SLCO4A1	1.68954
ENSSSCG00000008132	STARD7	1.67248
ENSSSCG00000008162	IL1R1	1.67248
ENSSSCG00000006331	PBX1	1.63835
ENSSSCG00000007767	ZNF668	1.63835
ENSSSCG00000013397	ARNTL	1.63835
ENSSSCG00000038443	ZNF639	1.63835
ENSSSCG00000004739	MGA	1.62128
ENSSSCG00000011496	ADAMTS9	1.62128
ENSSSCG00000014056	RNF44	1.62128
ENSSSCG00000016191		1.62128
ENSSSCG00000025698	SERPINE1	1.62128
ENSSSCG00000027684	TRIM63	1.62128
ENSSSCG00000015872	GPD2	1.60421
ENSSSCG00000015595	ATF3	1.58715
ENSSSCG00000016057	STAT1	1.58715
ENSSSCG00000021436	DFFB	1.58715
ENSSSCG00000035774	ERRFI1	1.58715
ENSSSCG00000000063	POLR3H	1.57008
ENSSSCG00000001708	CDC5L	1.57008
ENSSSCG00000002867	CEBPG	1.57008
ENSSSCG00000011076	OTUD1	1.57008
ENSSSCG00000011849	TNK2	1.57008
ENSSSCG00000020853	BTBD3	1.57008
ENSSSCG00000033541	NAT8L	1.57008
ENSSSCG00000034191	SOX6	1.57008
ENSSSCG00000000587	AEBP2	1.55302
ENSSSCG00000008171	NPAS2	1.55302
ENSSSCG00000000014	FAM118A	1.51888
ENSSSCG00000005917	HSF1	1.51888
ENSSSCG00000009440	ELF1	1.51888
ENSSSCG00000023806	LRRN1	1.51888
ENSSSCG00000009801	BCL7A	1.50182
ENSSSCG00000010911	ZNF281	1.50182
ENSSSCG00000007484	ZNF217	1.48475
ENSSSCG00000010456	PANK1	1.48475
ENSSSCG00000015613	C1orf74	1.48475
ENSSSCG00000037066	GADD45A	1.48475
ENSSSCG00000004127	PLAGL1	1.46768
ENSSSCG00000011401	LSMEM2	1.46768
ENSSSCG00000011743	MECOM	1.46768
ENSSSCG00000017137	METRNL	1.46768
ENSSSCG00000017623	VEZF1	1.46768
ENSSSCG00000022387	TBPL1	1.46768
ENSSSCG00000037762	TBX1	1.46768
ENSSSCG00000038076	ATF2	1.46768
ENSSSCG00000002885	USF2	1.45062
ENSSSCG00000011025	ZEB1	1.45062
ENSSSCG00000016690	CREB5	1.45062
ENSSSCG00000022318	ERG	1.45062
ENSSSCG00000023714	SLC31A2	1.45062
ENSSSCG00000017391	PLEKHH3	1.43355
ENSSSCG00000023565	IKZF5	1.43355
ENSSSCG00000034395	CREB1	1.43355
ENSSSCG00000037912	FITM2	1.43355
ENSSSCG00000005631	FAM102A	1.41649
ENSSSCG00000007559	MAFK	1.41649
ENSSSCG00000009655	EBF2	1.41649
ENSSSCG00000011514	MITF	1.41649
ENSSSCG00000016138	ATF1	1.41649
ENSSSCG00000016703	HOXA5	1.41649
ENSSSCG00000023105	NET1	1.41649
ENSSSCG00000025182	ELK4	1.41649
ENSSSCG00000026161	E2F6	1.41649
ENSSSCG00000026894	NFE2L3	1.41649
ENSSSCG00000035518		1.41649
ENSSSCG00000008553	PREB	1.39942
ENSSSCG00000004399	SLC22A16	1.38235
ENSSSCG00000009029	ARHGAP10	1.38235
ENSSSCG00000028322	BTG2	1.38235
ENSSSCG00000032372	ZFP90	1.38235
ENSSSCG00000004290	TBX18	1.36529
ENSSSCG00000013028	ESRRA	1.36529
ENSSSCG00000014149	MEF2C	1.36529
ENSSSCG00000025321	MAZ	1.36529
ENSSSCG00000030095	ZBTB16	1.36529
ENSSSCG00000036033	THRB	1.36529
ENSSSCG00000037558	YY1	1.36529
ENSSSCG00000038500	TRIB1	1.36529
ENSSSCG00000017682	MYO19	1.34822
ENSSSCG00000024672	KLF16	1.34822
ENSSSCG00000026248	PAQR4	1.34822
ENSSSCG00000011858	ZNF148	1.33116
ENSSSCG00000015774		1.33116
ENSSSCG00000015962	SP3	1.33116
ENSSSCG00000027628	IL6R	1.33116
ENSSSCG00000030484	AHR	1.33116
ENSSSCG00000031503	PRRX1	1.33116
ENSSSCG00000032043	SLC35D1	1.33116
ENSSSCG00000004524	SMAD4	1.31409
ENSSSCG00000005318	CREB3	1.31409
ENSSSCG00000006468	HDGF	1.31409
ENSSSCG00000008909	CLOCK	1.31409
ENSSSCG00000012620	NKRF	1.31409
ENSSSCG00000026533	MYF6	1.31409
ENSSSCG00000004600	TCF12	1.29702
ENSSSCG00000005981	FBXO32	1.29702
ENSSSCG00000032527	FOSL2	1.29702
ENSSSCG00000035037		1.29702
ENSSSCG00000037766	NR3C2	1.29702
ENSSSCG00000011499	LRIG1	1.27996
ENSSSCG00000028190	HOMEZ	1.27996
ENSSSCG00000032053	ST8SIA5	1.27996
ENSSSCG00000029507	RASGEF1B	1.26289
ENSSSCG00000005965	MYC	1.24583
ENSSSCG00000007235	TPX2	1.24583
ENSSSCG00000028606	ZBTB7B	1.24583
ENSSSCG00000032242	HMGA1	1.24583
ENSSSCG00000004576	RORA	1.22876
ENSSSCG00000014401	NR3C1	1.22876
ENSSSCG00000030118	SAP30	1.22876
ENSSSCG00000031262	TXNIP	1.22876
ENSSSCG00000033032	ZBTB14	1.22876
ENSSSCG00000035400	YPEL2	1.22876
ENSSSCG00000037970	SOX8	1.22876
ENSSSCG00000000702	ZNF384	1.21169
ENSSSCG00000007958	ZNF174	1.21169
ENSSSCG00000022347	WNT11	1.21169
ENSSSCG00000025448	SERTAD3	1.21169
ENSSSCG00000034654	MYOG	1.21169
ENSSSCG00000038423	GLA	1.21169
ENSSSCG00000005089	SIX4	1.19463
ENSSSCG00000009808	TMEM120B	1.19463
ENSSSCG00000010517		1.19463
ENSSSCG00000023724	ZBTB1	1.19463
ENSSSCG00000036223	ACKR1	1.19463
ENSSSCG00000036933	NR1D1	1.19463
ENSSSCG00000002254	NR2F2	1.17756
ENSSSCG00000007094	DZANK1	1.17756
ENSSSCG00000016338	PER2	1.17756
ENSSSCG00000022256	DEPP1	1.17756
ENSSSCG00000022413	TIRAP	1.17756
ENSSSCG00000025238	SHOX2	1.17756
ENSSSCG00000036308	PGS1	1.17756
ENSSSCG00000004929	PARP16	1.16049
ENSSSCG00000006277	SPIDR	1.16049
ENSSSCG00000010626	RBM20	1.16049
ENSSSCG00000012875		1.16049
ENSSSCG00000013113	TMEM132A	1.16049
ENSSSCG00000017125	FOXK2	1.16049
ENSSSCG00000022343	ENO1	1.16049
ENSSSCG00000031159	BEND3	1.16049
ENSSSCG00000008374	B3GNT2	1.14343
ENSSSCG00000015659	YOD1	1.14343
ENSSSCG00000027251	CDC7	1.14343
ENSSSCG00000029687	TMEM246	1.14343
ENSSSCG00000030947	ZFAT	1.14343
ENSSSCG00000040178	E2F3	1.14343
ENSSSCG00000005385	NR4A3	1.12636
ENSSSCG00000010529	SFRP5	1.1093
ENSSSCG00000022155	RBPJ	1.1093
ENSSSCG00000024960	PDGFC	1.1093
ENSSSCG00000000633	YBX3	1.09223
ENSSSCG00000012315	SYNJ2	1.09223
ENSSSCG00000017251	SOX9	1.09223
ENSSSCG00000037201	MPV17	1.09223
ENSSSCG00000038313	ZNF219	1.09223
ENSSSCG00000004215	KIAA0408	1.07516
ENSSSCG00000009807	RHOF	1.07516
ENSSSCG00000011433	WDR82	1.07516
ENSSSCG00000011670	PXYLP1	1.07516
ENSSSCG00000003579	AHDC1	1.0581
ENSSSCG00000016606	ASB15	1.0581
ENSSSCG00000023373	ZNHIT3	1.0581
ENSSSCG00000032080	ZNF35	1.0581
ENSSSCG00000035281	ZNF292	1.0581
ENSSSCG00000037516	MTF1	1.0581
ENSSSCG00000038739	MYPOP	1.0581
ENSSSCG00000015568	RNF2	1.04103
ENSSSCG00000017744	SUZ12	1.04103
ENSSSCG00000017254	MAP2K6	1.02397
ENSSSCG00000017506	FBXL20	1.02397
ENSSSCG00000040412		1.02397
ENSSSCG00000001723	PLA2G7	1.0069
ENSSSCG00000004163	BCLAF1	1.0069
ENSSSCG00000004347	FBXL4	1.0069
ENSSSCG00000010210	SLC16A9	1.0069
ENSSSCG00000013292	PRR5L	1.0069
ENSSSCG00000017516	SP2	1.0069
ENSSSCG00000024954	FGF1	1.0069
ENSSSCG00000036401		1.0069
ENSSSCG00000038220	RXRA	1.0069
ENSSSCG00000011075	KIAA1217	0.989834
ENSSSCG00000006018	TRPS1	0.972768
ENSSSCG00000009865	TBX3	0.972768
ENSSSCG00000012981	RELA	0.972768
ENSSSCG00000015237	FLI1	0.972768
ENSSSCG00000034494	MARS2	0.972768
ENSSSCG00000001471	BRD2	0.955702
ENSSSCG00000003976	NFYC	0.955702
ENSSSCG00000009755	AACS	0.955702
ENSSSCG00000011646	KY	0.955702
ENSSSCG00000017134	FN3KRP	0.955702
ENSSSCG00000017477	CASC3	0.955702
ENSSSCG00000004505	SMAD2	0.938636
ENSSSCG00000005503	TLR4	0.938636
ENSSSCG00000009152	SGMS2	0.938636
ENSSSCG00000031562	MZF1	0.938636
ENSSSCG00000035952	TGFB1I1	0.938636
ENSSSCG00000008446	SIX2	0.92157
ENSSSCG00000031321	NR4A1	0.92157
ENSSSCG00000031866	TIMP3	0.92157
ENSSSCG00000001661	SRF	0.904503
ENSSSCG00000009370	FOXO1	0.904503
ENSSSCG00000009676	ZNF395	0.904503
ENSSSCG00000010329	ZMIZ1	0.904503
ENSSSCG00000012941	SLC29A2	0.904503
ENSSSCG00000024219	TIGAR	0.904503
ENSSSCG00000026784	LMNB2	0.904503
ENSSSCG00000028997		0.904503
ENSSSCG00000010537	GOT1	0.887437
ENSSSCG00000011133	PFKFB3	0.887437
ENSSSCG00000013667	COL5A3	0.887437
ENSSSCG00000015969	CHRNA1	0.887437
ENSSSCG00000034994	AKAP1	0.887437
ENSSSCG00000036742	KLF15	0.887437
ENSSSCG00000001921	NEO1	0.870371
ENSSSCG00000002281		0.870371
ENSSSCG00000004789	THBS1	0.870371
ENSSSCG00000003030	CIC	0.853305
ENSSSCG00000013351	NAV2	0.853305
ENSSSCG00000030268	ZFAND5	0.853305
ENSSSCG00000009364	FREM2	0.836239
ENSSSCG00000010464	PPP1R3C	0.836239
ENSSSCG00000015589	VASH2	0.836239
ENSSSCG00000016134	FASTKD2	0.836239
ENSSSCG00000034262	FIGN	0.836239
ENSSSCG00000036723	EMP1	0.836239
ENSSSCG00000008337	AAK1	0.819173
ENSSSCG00000010429	PRKG1	0.819173
ENSSSCG00000029226	UBC	0.819173
ENSSSCG00000033146	CD163	0.819173
ENSSSCG00000039867	UCK2	0.819173
ENSSSCG00000007681	CUX1	0.802107
ENSSSCG00000009716	SH3RF1	0.802107
ENSSSCG00000011604	CHCHD4	0.802107
ENSSSCG00000026196		0.802107
ENSSSCG00000004387	FOXO3	0.785041
ENSSSCG00000008388	REL	0.785041
ENSSSCG00000017046	EBF1	0.785041
ENSSSCG00000022933	EFR3B	0.785041
ENSSSCG00000028771	MEF2A	0.785041
ENSSSCG00000002315	SLC8A3	0.767975
ENSSSCG00000027060	TBX2	0.767975
ENSSSCG00000037520		0.767975
ENSSSCG00000038763	CERK	0.767975
ENSSSCG00000000759		0.750909
ENSSSCG00000001621	TFEB	0.750909
ENSSSCG00000004154	TNFAIP3	0.750909
ENSSSCG00000010757	EBF3	0.750909
ENSSSCG00000011746	SKIL	0.750909
ENSSSCG00000016605	LMOD2	0.750909
ENSSSCG00000020954	PCGF6	0.750909
ENSSSCG00000022728	HOXC10	0.750909
ENSSSCG00000027342	BAZ1B	0.750909
ENSSSCG00000027480	KLF10	0.750909
ENSSSCG00000028117		0.750909
ENSSSCG00000003211		0.733842
ENSSSCG00000004980	THSD4	0.733842
ENSSSCG00000005233	DMRT2	0.733842
ENSSSCG00000007576	FOXK1	0.733842
ENSSSCG00000012850	DEAF1	0.733842
ENSSSCG00000013375	MYOD1	0.733842
ENSSSCG00000003264	CNOT3	0.716776
ENSSSCG00000004535	TCF4	0.716776
ENSSSCG00000011125	GATA3	0.716776
ENSSSCG00000011594	NR2C2	0.716776
ENSSSCG00000014915	EED	0.716776
ENSSSCG00000016462	CLCN1	0.716776
ENSSSCG00000017214	ARMC7	0.716776
ENSSSCG00000022846	SLC4A3	0.716776
ENSSSCG00000027952	ADCY5	0.716776
ENSSSCG00000034207	CEBPB	0.716776
ENSSSCG00000035101	KLF5	0.716776
ENSSSCG00000037292	PLA2G4E	0.716776
ENSSSCG00000038132	IRF2BP2	0.716776
ENSSSCG00000002002	IRF9	0.69971
ENSSSCG00000002305	EXD2	0.69971
ENSSSCG00000009243	THAP9	0.69971
ENSSSCG00000013399	TEAD1	0.69971
ENSSSCG00000015378	SP4	0.69971
ENSSSCG00000036403	FAM180A	0.69971
ENSSSCG00000002917	NFKBID	0.682644
ENSSSCG00000008687	MXD4	0.682644
ENSSSCG00000016851	OSMR	0.682644
ENSSSCG00000016986	CREBRF	0.682644
ENSSSCG00000029275	PPARGC1A	0.682644
ENSSSCG00000038521	CHAC1	0.682644
ENSSSCG00000009794	MLXIP	0.665578
ENSSSCG00000012241		0.665578
ENSSSCG00000021586	ZHX2	0.665578
ENSSSCG00000025752	ZNF746	0.665578
ENSSSCG00000036136	BHLHE40	0.665578
ENSSSCG00000001430	ATF6B	0.648512
ENSSSCG00000003590	PTPRU	0.648512
ENSSSCG00000010580	NFKB2	0.648512
ENSSSCG00000015145	ZNF202	0.648512
ENSSSCG00000017397	MLX	0.648512
ENSSSCG00000038594	SDC4	0.648512
ENSSSCG00000039580	FOXJ2	0.648512
ENSSSCG00000001988	ADCY4	0.631446
ENSSSCG00000011264	CSRNP1	0.631446
ENSSSCG00000034708	PITX2	0.631446
ENSSSCG00000038948	ETS2	0.631446
ENSSSCG00000008443	EPAS1	0.61438
ENSSSCG00000009814	ANAPC5	0.61438
ENSSSCG00000035253	MAFG	0.61438
ENSSSCG00000000736	TEAD4	0.597314
ENSSSCG00000002741	ZNF821	0.597314
ENSSSCG00000016436	CHPF2	0.597314
ENSSSCG00000035673	HBP1	0.597314
ENSSSCG00000036331		0.597314
ENSSSCG00000003747	KIAA1328	0.580247
ENSSSCG00000008881	RAPGEF2	0.580247
ENSSSCG00000017366	HDAC5	0.580247
ENSSSCG00000017498	PPP1R1B	0.580247
ENSSSCG00000024253	CTCF	0.580247
ENSSSCG00000025568	TEAD2	0.580247
ENSSSCG00000028056	ZFP36	0.580247
ENSSSCG00000006482	MEF2D	0.563181
ENSSSCG00000006893	BCAR3	0.563181
ENSSSCG00000011201	SATB1	0.563181
ENSSSCG00000023803	ELK3	0.563181
ENSSSCG00000032728	EFNB1	0.563181
ENSSSCG00000038598	ADRB2	0.563181
ENSSSCG00000001898	ULK3	0.546115
ENSSSCG00000003178	IRF3	0.546115
ENSSSCG00000005604	PBX3	0.546115
ENSSSCG00000012769	ATP2B3	0.546115
ENSSSCG00000015112	HINFP	0.546115
ENSSSCG00000016835	SKP2	0.546115
ENSSSCG00000017987		0.546115
ENSSSCG00000021408	TKT	0.546115
ENSSSCG00000022070	ZNF143	0.546115
ENSSSCG00000026724	PLBD1	0.546115
ENSSSCG00000033489	C10orf71	0.546115
ENSSSCG00000034278	SLC31A1	0.546115
ENSSSCG00000001156	ZNF322	0.529049
ENSSSCG00000004918	ALPK2	0.529049
ENSSSCG00000006218	PDE7A	0.529049
ENSSSCG00000033786		0.529049
ENSSSCG00000000084	ATF4	0.511983
ENSSSCG00000008493	CEBPZ	0.511983
ENSSSCG00000040751	DDIT3	0.511983
ENSSSCG00000000258	RARG	0.494917
ENSSSCG00000002993	CYP2A19	0.494917
ENSSSCG00000003558	RPS6KA1	0.494917
ENSSSCG00000022760	HNRNPK	0.494917
ENSSSCG00000034102	DGAT2	0.494917
ENSSSCG00000005449	PTPN3	0.477851
ENSSSCG00000012844	SLC25A22	0.477851
ENSSSCG00000017759	ALDOC	0.477851
ENSSSCG00000030277	ENDOV	0.477851
ENSSSCG00000011641	SLCO2A1	0.460785
ENSSSCG00000013655	ICAM1	0.460785
ENSSSCG00000032367	CEBPD	0.460785
ENSSSCG00000035969	THRA	0.460785
ENSSSCG00000039348	H1F0	0.460785
ENSSSCG00000001061	JARID2	0.443719
ENSSSCG00000001611	NFYA	0.443719
ENSSSCG00000001844	PLIN1	0.443719
ENSSSCG00000003805	PDE4B	0.443719
ENSSSCG00000015037	IL18	0.443719
ENSSSCG00000017801	TRARG1	0.443719
ENSSSCG00000021204	HOXA10	0.443719
ENSSSCG00000021386	PTGR1	0.443719
ENSSSCG00000034049		0.443719
ENSSSCG00000003527	EPHB2	0.426653
ENSSSCG00000008334	MXD1	0.426653
ENSSSCG00000015270	FMOD	0.426653
ENSSSCG00000021232	SYNC	0.426653
ENSSSCG00000025822	SFRP1	0.426653
ENSSSCG00000037835	TRIM7	0.426653
ENSSSCG00000000971	HDAC10	0.409586
ENSSSCG00000010027	PATZ1	0.409586
ENSSSCG00000010224	EGR2	0.409586
ENSSSCG00000013056	LGALS12	0.409586
ENSSSCG00000028104	HOXC11	0.409586
ENSSSCG00000029944	FASN	0.409586
ENSSSCG00000032115	OSGIN1	0.409586
ENSSSCG00000033822	THRSP	0.409586
ENSSSCG00000038164	RAI1	0.409586
ENSSSCG00000038727	GDNF	0.409586
ENSSSCG00000038956	HEYL	0.409586
ENSSSCG00000000645	GABARAPL1	0.39252
ENSSSCG00000000741	NRIP2	0.39252
ENSSSCG00000004856	NFATC1	0.39252
ENSSSCG00000011106	CREM	0.39252
ENSSSCG00000013784	DNAJB1	0.39252
ENSSSCG00000015211	PKNOX2	0.39252
ENSSSCG00000015871	NR4A2	0.39252
ENSSSCG00000016164	IKZF2	0.39252
ENSSSCG00000023181	ZNF385B	0.39252
ENSSSCG00000024416	MYH13	0.39252
ENSSSCG00000024644	CIDEA	0.39252
ENSSSCG00000028277		0.39252
ENSSSCG00000030626	ALDH1L1	0.39252
ENSSSCG00000037501	FANCF	0.39252
ENSSSCG00000040890	ABHD14B	0.39252
ENSSSCG00000002852	PLEKHF1	0.375454
ENSSSCG00000003148	DBP	0.375454
ENSSSCG00000010554	SCD	0.375454
ENSSSCG00000028572	PER3	0.375454
ENSSSCG00000032450		0.375454
ENSSSCG00000038374	CIART	0.375454
ENSSSCG00000000487	SLC35E3	0.358388
ENSSSCG00000023133	OSBPL6	0.358388
ENSSSCG00000030303	ACHE	0.358388
ENSSSCG00000035152	TEF	0.358388
ENSSSCG00000006625	RFX5	0.341322
ENSSSCG00000009927	FAM222A	0.341322
ENSSSCG00000010814	ESRRG	0.341322
ENSSSCG00000012853	IRF7	0.341322
ENSSSCG00000017983		0.341322
ENSSSCG00000024596	NOCT	0.341322
ENSSSCG00000025240	DDIT4L	0.341322
ENSSSCG00000040464	LEP	0.341322
ENSSSCG00000003233	ZNF175	0.324256
ENSSSCG00000005087	SIX1	0.324256
ENSSSCG00000007350	PPP1R16B	0.324256
ENSSSCG00000007874	ABCC1	0.324256
ENSSSCG00000017546	ZNF652	0.324256
ENSSSCG00000002752	ZFHX3	0.30719
ENSSSCG00000011212	RARB	0.30719
ENSSSCG00000015985	HOXD3	0.30719
ENSSSCG00000017402	STAT5A	0.30719
ENSSSCG00000000499	BEST3	0.290124
ENSSSCG00000002140		0.290124
ENSSSCG00000004090	ZBTB2	0.290124
ENSSSCG00000008464	MTA3	0.290124
ENSSSCG00000009672	SCARA5	0.290124
ENSSSCG00000010739	CTBP2	0.290124
ENSSSCG00000013437	TCF3	0.290124
ENSSSCG00000013599	ANGPTL4	0.290124
ENSSSCG00000015986	HOXD1	0.290124
ENSSSCG00000023660	PARP1	0.290124
ENSSSCG00000033626	SREBF1	0.290124
ENSSSCG00000039681	B9D1	0.290124
ENSSSCG00000005303	PIGO	0.273058
ENSSSCG00000007034	PSD3	0.273058
ENSSSCG00000007710	MLXIPL	0.273058
ENSSSCG00000035940	SPSB1	0.273058
ENSSSCG00000036756	ZNF496	0.273058
ENSSSCG00000002383	FOS	0.255992
ENSSSCG00000006560	CREB3L4	0.255992
ENSSSCG00000013263	CREB3L1	0.255992
ENSSSCG00000016956	MAST4	0.255992
ENSSSCG00000025021	MALL	0.255992
ENSSSCG00000025717	HIC1	0.255992
ENSSSCG00000037190	TAGLN3	0.255992
ENSSSCG00000039568	SNAI2	0.255992
ENSSSCG00000010461	ANKRD1	0.238925
ENSSSCG00000010639	HABP2	0.238925
ENSSSCG00000015550	RGS16	0.238925
ENSSSCG00000017406	STAT5B	0.238925
ENSSSCG00000026092	SREBF2	0.238925
ENSSSCG00000001539	PPARD	0.221859
ENSSSCG00000005636	SLC25A25	0.221859
ENSSSCG00000032566	ZHX3	0.221859
ENSSSCG00000000419	RDH16	0.204793
ENSSSCG00000003253		0.204793
ENSSSCG00000003616	FAM167B	0.204793
ENSSSCG00000005190	NFIB	0.204793
ENSSSCG00000008690	RNF4	0.204793
ENSSSCG00000009245	SCD5	0.204793
ENSSSCG00000023243	NFIA	0.204793
ENSSSCG00000023674	SON	0.204793
ENSSSCG00000026006	KLF13	0.204793
ENSSSCG00000029371	C5AR1	0.204793
ENSSSCG00000030155	PHF10	0.204793
ENSSSCG00000036314	HHEX	0.204793
ENSSSCG00000004142	CITED2	0.187727
ENSSSCG00000007117	GZF1	0.187727
ENSSSCG00000008593	KLHL29	0.187727
ENSSSCG00000013764	RFX1	0.187727
ENSSSCG00000015559	NCF2	0.187727
ENSSSCG00000002787	E2F4	0.170661
ENSSSCG00000004012	THBS2	0.170661
ENSSSCG00000004520	MAPK4	0.170661
ENSSSCG00000017525	NFE2L1	0.170661
ENSSSCG00000032144	ZNF140	0.170661
ENSSSCG00000035863	PLIN2	0.170661
ENSSSCG00000001137	HIST1H1D	0.153595
ENSSSCG00000009040	SMAD1	0.153595
ENSSSCG00000012967	FOSL1	0.153595
ENSSSCG00000013753	IER2	0.153595
ENSSSCG00000038144		0.153595
ENSSSCG00000038631	TCFL5	0.153595
ENSSSCG00000006371	USF1	0.136529
ENSSSCG00000011235	UBP1	0.136529
ENSSSCG00000014878	PAK1	0.136529
ENSSSCG00000016573	IRF5	0.136529
ENSSSCG00000029533	SEMA4G	0.136529
ENSSSCG00000029578	NFATC3	0.136529
ENSSSCG00000035074	FOXO6	0.136529
ENSSSCG00000038643	KLF11	0.136529
ENSSSCG00000038879	RELB	0.136529
ENSSSCG00000039986	RGS8	0.136529
ENSSSCG00000040349	HOXD8	0.136529
ENSSSCG00000014399	ARHGAP26	0.119463
ENSSSCG00000024152	ETV6	0.119463
ENSSSCG00000037865	SOX18	0.119463
ENSSSCG00000039587		0.119463
ENSSSCG00000000396	STAT2	0.102397
ENSSSCG00000003201	ATF5	0.102397
ENSSSCG00000004238	HSF2	0.102397
ENSSSCG00000005514	RAB14	0.102397
ENSSSCG00000009682	HMBOX1	0.102397
ENSSSCG00000016701	HOXA7	0.102397
ENSSSCG00000020801	ARX	0.102397
ENSSSCG00000032251	MAFB	0.102397
ENSSSCG00000032381	LITAF	0.102397
ENSSSCG00000003998	ZNF274	0.0853305
ENSSSCG00000012371	AR	0.0853305
ENSSSCG00000013241	NR1H3	0.0853305
ENSSSCG00000014277	IRF1	0.0853305
ENSSSCG00000017723	CCL2	0.0853305
ENSSSCG00000027762	TNFRSF11B	0.0853305
ENSSSCG00000033613	FOXS1	0.0853305
ENSSSCG00000034192	GNAO1	0.0853305
ENSSSCG00000034297	HES2	0.0853305
ENSSSCG00000036956		0.0853305
ENSSSCG00000002755	NFAT5	0.0682644
ENSSSCG00000007243	PLAGL2	0.0682644
ENSSSCG00000008625	NTSR2	0.0682644
ENSSSCG00000013786	ZNF333	0.0682644
ENSSSCG00000014336	EGR1	0.0682644
ENSSSCG00000015782	IRF2	0.0682644
ENSSSCG00000017403	STAT3	0.0682644
ENSSSCG00000021657	SATB2	0.0682644
ENSSSCG00000032644	HLX	0.0682644
ENSSSCG00000038872	GMEB1	0.0682644
ENSSSCG00000040145	SNAI3	0.0682644
ENSSSCG00000000958	DYRK2	0.0511983
ENSSSCG00000001438	PBX2	0.0511983
ENSSSCG00000009560	TFDP1	0.0511983
ENSSSCG00000012399	FOXO4	0.0511983
ENSSSCG00000023229	ETV5	0.0511983
ENSSSCG00000031592	ZNF462	0.0511983
ENSSSCG00000031616	FOSB	0.0511983
ENSSSCG00000037267	MAX	0.0511983
ENSSSCG00000039161	MEIS1	0.0511983
ENSSSCG00000002792	HSF4	0.0341322
ENSSSCG00000002838	ZNF423	0.0341322
ENSSSCG00000002906	ETV2	0.0341322
ENSSSCG00000004803	ACTC1	0.0341322
ENSSSCG00000004952	SMAD3	0.0341322
ENSSSCG00000006725	TBX15	0.0341322
ENSSSCG00000007477	NFATC2	0.0341322
ENSSSCG00000007963	ZNF263	0.0341322
ENSSSCG00000008119	KCNIP3	0.0341322
ENSSSCG00000008241	TCF7L1	0.0341322
ENSSSCG00000009974	EWSR1	0.0341322
ENSSSCG00000011579	PPARG	0.0341322
ENSSSCG00000012279	ELK1	0.0341322
ENSSSCG00000013307	LMO2	0.0341322
ENSSSCG00000015545	GLUL	0.0341322
ENSSSCG00000015733	GLI2	0.0341322
ENSSSCG00000016520	CREB3L2	0.0341322
ENSSSCG00000016566	NRF1	0.0341322
ENSSSCG00000017379	ETV4	0.0341322
ENSSSCG00000023031	TNNT2	0.0341322
ENSSSCG00000029236	ZBTB7A	0.0341322
ENSSSCG00000029576	ZNF239	0.0341322
ENSSSCG00000030672	ZNF692	0.0341322
ENSSSCG00000034774	TBX6	0.0341322
ENSSSCG00000035895	JDP2	0.0341322
ENSSSCG00000037642	ARID3A	0.0341322
ENSSSCG00000040435	STAT6	0.0341322
ENSSSCG00000001021	RREB1	0.0170661
ENSSSCG00000001049	HIVEP1	0.0170661
ENSSSCG00000002388	ESRRB	0.0170661
ENSSSCG00000003107	ARHGAP35	0.0170661
ENSSSCG00000006187	MSC	0.0170661
ENSSSCG00000006353	NR1I3	0.0170661
ENSSSCG00000008985	SOWAHB	0.0170661
ENSSSCG00000009422	TSC22D1	0.0170661
ENSSSCG00000010638	TCF7L2	0.0170661
ENSSSCG00000012135	VEGFD	0.0170661
ENSSSCG00000017376	MEOX1	0.0170661
ENSSSCG00000017927		0.0170661
ENSSSCG00000025578	ALDH1A2	0.0170661
ENSSSCG00000025592	TP63	0.0170661
ENSSSCG00000027056	ZNF350	0.0170661
ENSSSCG00000028552	BHLHE41	0.0170661
ENSSSCG00000030957	NFKB1	0.0170661
ENSSSCG00000031356	HES1	0.0170661
ENSSSCG00000032164	PEA15	0.0170661
ENSSSCG00000032429	RAX2	0.0170661
ENSSSCG00000035403	RFX2	0.0170661
ENSSSCG00000036537	NFIC	0.0170661
ENSSSCG00000038911	KLF2	0.0170661
ENSSSCG00000040607	MAF	0.0170661
