# Supplementary material for: Co-expression network analysis predicts a key role of microRNAs in the adaptation of the porcine skeletal muscle to nutrient supply
Source: J Anim Sci Biotechnol. 2020 Jan 17;11:10. doi: 10.1186/s40104-019-0412-z (PMC6966835; doi:10.1186/s40104-019-0412-z)
Supplement: Supplementary file 12 — Additional file 12: Table S12. Regulatory Impact Factor scores (RIF1 and RIF2) for miRNAs classified by the PCIT algorithm as meaningful regulators in the AL-T0/AL-T1 and AL-T0/AL-T2 contrasts. [file 40104_2019_412_MOESM12_ESM.xlsx]

## Sheet: RIF_ALT0ALT1_miRNAs
Table S12: Regulatory Impact Factor scores (RIF1 and RIF2) for expressed miRNAs previously selected with the PCIT algorithm as meaningful regulators in the AL-T0/AL-T1 contrast.
miRNA	RIF1	RIF2
ssc-miR-450b-5p	1.7939	-1.55853
ssc-miR-32	1.70412	0.511156
ssc-miR-136-5p	1.39276	-0.525977
ssc-miR-542-3p	1.29686	-1.48934
ssc-miR-19a	1.26202	-0.166152
ssc-miR-499-5p	0.697622	0.301779
ssc-miR-30e-5p	0.667369	0.191462
ssc-miR-143-3p	0.551823	-1.39234
ssc-miR-7-5p	0.351426	-0.748326
ssc-miR-6516	0.298871	0.233287
ssc-miR-1	0.297327	-0.939958
ssc-miR-148a-3p	-0.105137	0.467722
ssc-miR-455-5p	-0.118794	-0.940844
ssc-miR-30c-1-3p	-0.243027	0.94571
ssc-miR-129a-3p	-0.717879	1.83732
ssc-miR-450b-3p	-0.766953	1.09126
ssc-miR-219a	-0.852917	1.4996
ssc-miR-214-3p	-0.880139	-0.521568
ssc-miR-296-5p	-0.947859	-1.06135
ssc-miR-339-3p	-0.986385	-0.116652
ssc-miR-421-5p	-0.9871	0.36602
ssc-miR-503	-1.16805	1.20525
ssc-miR-326	-1.25688	-0.615108
ssc-miR-128	-1.28298	1.42556

## Sheet: RIF_ALT0ALT2_miRNAs
Table S12: Regulatory Impact Factor scores (RIF1 and RIF2) for expressed miRNAs previously selected with the PCIT algorithm as meaningful regulators the AL-T0/AL-T2 contrast.
miRNA	RIF1	RIF2
ssc-miR-9858-5p	2.75355	-0.220513
ssc-miR-148b-5p	2.4587	-1.82797
ssc-miR-32	2.38252	-1.16446
ssc-miR-129a-5p	1.90097	1.36305
ssc-miR-7139-5p	1.37966	-2.67674
ssc-miR-503	1.34253	0.00450028
ssc-miR-345-3p	1.33958	0.36773
ssc-miR-1285	1.18652	2.20892
ssc-miR-7-5p	1.01993	-2.0613
ssc-miR-22-3p	0.898116	0.766965
ssc-miR-296-5p	0.886406	-1.63676
ssc-miR-493-5p	0.837616	1.21994
ssc-miR-374a-3p	0.731413	-1.67578
ssc-miR-148a-3p	0.625463	-1.0826
ssc-let-7i-5p	0.45221	-1.38827
ssc-miR-2411	0.423183	-0.962826
ssc-miR-130a	0.418202	-0.709352
ssc-miR-136-5p	0.385334	-0.550478
ssc-miR-664-5p	0.327092	0.940471
ssc-miR-26b-3p	0.319038	0.850576
ssc-miR-181d-5p	0.083973	0.423213
ssc-miR-374b-3p	0.0702845	-0.1551
ssc-miR-421-5p	0.0605492	-0.175848
ssc-miR-146a-5p	-0.0831465	0.470077
ssc-miR-129a-3p	-0.255429	1.51086
ssc-miR-206	-0.285124	1.7993
ssc-miR-151-3p	-0.29919	-0.784541
ssc-miR-196b-5p	-0.341548	0.170779
ssc-miR-361-3p	-0.378188	0.901876
ssc-miR-455-5p	-0.419848	-0.726611
ssc-miR-1249	-0.437687	0.106105
ssc-let-7d-5p	-0.449756	1.75374
ssc-miR-30a-3p	-0.496603	0.422466
ssc-miR-30e-3p	-0.51652	0.309454
ssc-miR-628-5p	-0.518037	0.858236
ssc-miR-196a	-0.541051	0.976223
ssc-miR-218b	-0.558734	-0.157351
ssc-miR-423-5p	-0.560297	0.430642
ssc-miR-758	-0.587687	1.02212
ssc-miR-182	-0.626658	0.414979
ssc-miR-450b-3p	-0.661489	0.408217
ssc-miR-450b-5p	-0.692331	-0.785602
ssc-miR-28-3p	-0.754287	0.477576
ssc-let-7e	-0.820021	-0.165731
ssc-let-7c	-0.865403	0.000897433
ssc-miR-98	-0.967101	0.333649
ssc-miR-7138-3p	-0.996622	0.238491
ssc-miR-128	-1.00174	0.283606
ssc-let-7f-5p	-1.05037	-0.245462
ssc-miR-148b-3p	-1.05956	0.09488
ssc-let-7g	-1.06293	0.0650711
ssc-miR-130b-5p	-1.13004	-0.732575
ssc-miR-339	-1.20691	-0.52537
ssc-miR-1	-1.26302	-0.244587
ssc-miR-326	-1.39552	-0.538782
