# Supplementary material for: Co-expression network analysis predicts a key role of microRNAs in the adaptation of the porcine skeletal muscle to nutrient supply
Source: J Anim Sci Biotechnol. 2020 Jan 17;11:10. doi: 10.1186/s40104-019-0412-z (PMC6966835; doi:10.1186/s40104-019-0412-z)
Supplement: Supplementary file 13 — Additional file 13: Table S13. Gene co-expression modules significantly associated with meat quality and fatty acids composition traits according to the WGCNA algorithm (AL-T0/AL-T1 contrast). [file 40104_2019_412_MOESM13_ESM.xlsx]

## Sheet: T0T1_WGCNA_Blue_module
Table S13: Gene co-expression Blue module and meat quality and gluteus medius (GM) fatty acids composition traits significantly associated according to WGCNA algorithm in the AL-T0/AL-T1 contrast.
Palmitic acid content (C16:0)
ID	Gene	P-value
ENSSSCG00000034753	FAM177A1	0.000702985
ENSSSCG00000009568		0.00125176
ENSSSCG00000015789	SNX25	0.00127051
ENSSSCG00000038158	THAP5	0.00146223
ENSSSCG00000005084	PPM1A	0.00179777
ENSSSCG00000002860	PDCD5	0.00188861
ENSSSCG00000009777	KMT5A	0.00189562
ENSSSCG00000033998	SLC43A3	0.00199402
ENSSSCG00000039778		0.00232847
ENSSSCG00000015798	ANKRD37	0.00238828
ENSSSCG00000009164	CISD2	0.00257337
ENSSSCG00000025326	TMEM243	0.00257896
ENSSSCG00000024168	AIMP1	0.00282952
ENSSSCG00000031435	MRPS14	0.00294699
ENSSSCG00000028908	DYNLT3	0.00300015
ENSSSCG00000035452		0.00313228
ENSSSCG00000010743	BCCIP	0.00343775
ENSSSCG00000021973	GPX8	0.00345904
ENSSSCG00000021851		0.00348258
ENSSSCG00000009536	ARGLU1	0.0036149
ENSSSCG00000018081	ATP6	0.00366388
ENSSSCG00000038581	RBIS	0.00379924
ENSSSCG00000012813	BRCC3	0.0039265
ENSSSCG00000007525		0.00401441
ENSSSCG00000034280	LARP1B	0.0040502
ENSSSCG00000011739	PDCD10	0.00412461
ENSSSCG00000015368	HDAC9	0.00434167
ENSSSCG00000032311		0.00435789
ENSSSCG00000032214	SOCS6	0.00455669
ENSSSCG00000011631	UBA5	0.00464212
ENSSSCG00000022333	C16orf87	0.00479167
ENSSSCG00000033879	ZNF280B	0.00481707
ENSSSCG00000024131	MINDY2	0.00501254
ENSSSCG00000002145	TTC5	0.00507366
ENSSSCG00000035538		0.00537354
ENSSSCG00000004370	ATG5	0.00547786
ENSSSCG00000013362	UEVLD	0.00550538
ENSSSCG00000038919	RP9	0.00555879
ENSSSCG00000010825	MARK1	0.00565031
ENSSSCG00000015669	ACVR2A	0.00575797
ENSSSCG00000011027	KIF5B	0.0058048
ENSSSCG00000015889		0.00582972
ENSSSCG00000016026	ZC3H15	0.00588313
ENSSSCG00000000559	RASSF8	0.00596506
ENSSSCG00000034816	METTL4	0.00600504
ENSSSCG00000018080	ATP8	0.00612942
ENSSSCG00000025478	MIB1	0.00614487
ENSSSCG00000016942	CWC27	0.00616915
ENSSSCG00000006904	GLMN	0.00619183
ENSSSCG00000035762		0.00619195
ENSSSCG00000006900	DIPK1A	0.00619468
ENSSSCG00000016874	PAIP1	0.00632082
ENSSSCG00000037463	MRPS36	0.00640878
ENSSSCG00000006925	KYAT3	0.00643576
ENSSSCG00000008729	LYAR	0.00645925
ENSSSCG00000004253		0.00646402
ENSSSCG00000007704	NSUN5	0.00647151
ENSSSCG00000015753	ANGPT2	0.00652542
ENSSSCG00000037399		0.00661049
ENSSSCG00000025514	RUFY3	0.00667067
ENSSSCG00000004569	LACTB	0.00670386
ENSSSCG00000022222	MTX2	0.00674598
ENSSSCG00000007089	MGME1	0.0068697
ENSSSCG00000008807	GUF1	0.00690868
ENSSSCG00000006090	MTERF3	0.00694754
ENSSSCG00000039544		0.00698593
ENSSSCG00000015960	MAP3K20	0.00702699
ENSSSCG00000006984	VPS37A	0.00729741
ENSSSCG00000038042	MRPS18C	0.00739146
ENSSSCG00000038977	RSBN1L	0.00740445
ENSSSCG00000036476	REEP3	0.00752275
ENSSSCG00000031456	ARL5B	0.00755446
ENSSSCG00000008297	TPRKB	0.0075705
ENSSSCG00000003790	ANKRD13C	0.00770329
ENSSSCG00000026618	CAVIN2	0.00779907
ENSSSCG00000002505	PAPOLA	0.00785002
ENSSSCG00000004394	RPF2	0.00785174
ENSSSCG00000030186	KIF2A	0.00801594
ENSSSCG00000030478		0.00818615
ENSSSCG00000022912	NT5C3A	0.00819556
ENSSSCG00000014197		0.00819889
ENSSSCG00000037053	AK6	0.00847059
ENSSSCG00000024096	RIPK2	0.00860502
ENSSSCG00000033814	SMIM15	0.00869913
ENSSSCG00000031580	LLPH	0.00872265
ENSSSCG00000026969	KRAS	0.00912342
ENSSSCG00000037954	CAVIN4	0.00913436
ENSSSCG00000037869	NDUFA5	0.00923685
ENSSSCG00000032650		0.00926594
ENSSSCG00000023408	SAMD4A	0.00947134
ENSSSCG00000027556	RSRC1	0.00953483
ENSSSCG00000016113	BMPR2	0.00957332
ENSSSCG00000009061	NAA15	0.00967079
ENSSSCG00000006982	ZDHHC2	0.00968443
ENSSSCG00000011763	MRPL47	0.00985633
ENSSSCG00000018078	COX2	0.0098688
ENSSSCG00000020912	HECTD2	0.00997727
ENSSSCG00000004446	RWDD1	0.0100869
ENSSSCG00000027270		0.0100931
ENSSSCG00000015888	RBMS1	0.0101138
ENSSSCG00000031433	COX11	0.0101256
ENSSSCG00000009479	RBM26	0.0101716
ENSSSCG00000004304	SLC35A1	0.0101775
ENSSSCG00000000849	HSP90B1	0.0102618
ENSSSCG00000004602	TEX9	0.0103242
ENSSSCG00000022790	SNX2	0.0103404
ENSSSCG00000008503	FEZ2	0.0103472
ENSSSCG00000011743	MECOM	0.0103498
ENSSSCG00000011677	GK5	0.0103886
ENSSSCG00000009177	DNAJB14	0.0104111
ENSSSCG00000011529	TRNT1	0.0104233
ENSSSCG00000009788	DENR	0.0104691
ENSSSCG00000014999	KBTBD3	0.0107114
ENSSSCG00000025107	CCDC58	0.0107199
ENSSSCG00000006785	RAP1A	0.0107613
ENSSSCG00000009074	ABHD18	0.0108865
ENSSSCG00000021217	FKBP3	0.0109912
ENSSSCG00000038383	DYNC2LI1	0.0109951
ENSSSCG00000016827	BRIX1	0.0109995
ENSSSCG00000021644	BRD7	0.0110655
ENSSSCG00000015776	RWDD4	0.0110662
ENSSSCG00000014075	NSA2	0.0110876
ENSSSCG00000014893	NARS2	0.0112126
ENSSSCG00000014215	PGGT1B	0.0112133
ENSSSCG00000030493	UTP23	0.0113499
ENSSSCG00000006136	RMDN1	0.0113538
ENSSSCG00000015933	FASTKD1	0.011365
ENSSSCG00000009390	SPRYD7	0.0114087
ENSSSCG00000011000		0.0114184
ENSSSCG00000015845	GTF2E2	0.0114634
ENSSSCG00000009820	GPN3	0.0115599
ENSSSCG00000037313	MTIF3	0.0116674
ENSSSCG00000011689	PLOD2	0.0117919
ENSSSCG00000037481	SYF2	0.0117949
ENSSSCG00000039969	THAP1	0.0117985
ENSSSCG00000006996	FRG1	0.0119369
ENSSSCG00000034156	GTF2F2	0.0119656
ENSSSCG00000025682	ACTR6	0.0119755
ENSSSCG00000028420	EIF4E	0.0119904
ENSSSCG00000035747	YIPF4	0.0119979
ENSSSCG00000032806	NUDCD2	0.0121623
ENSSSCG00000024681	TECRL	0.0121745
ENSSSCG00000001973	SCFD1	0.0122158
ENSSSCG00000009405	SUCLA2	0.0122238
ENSSSCG00000029380	ZFP2	0.0122251
ENSSSCG00000006029	NUDCD1	0.0122253
ENSSSCG00000035098	MED4	0.0122273
ENSSSCG00000005604	PBX3	0.0122855
ENSSSCG00000031627	WBP4	0.0124492
ENSSSCG00000003682	ANKRD12	0.012454
ENSSSCG00000032489	KLHDC1	0.0124782
ENSSSCG00000004460	IBTK	0.0125054
ENSSSCG00000009791	RSRC2	0.012639
ENSSSCG00000015668	ORC4	0.0126571
ENSSSCG00000037782	MRPS28	0.0126747
ENSSSCG00000005090	MNAT1	0.0126936
ENSSSCG00000016043	OSGEPL1	0.0126992
ENSSSCG00000008359	RAB1A	0.0128464
ENSSSCG00000025060		0.012856
ENSSSCG00000009225	HSD17B11	0.0129557
ENSSSCG00000004635	SPPL2A	0.0130124
ENSSSCG00000029198	CUL5	0.0130223
ENSSSCG00000009334	HSPH1	0.0130963
ENSSSCG00000022190	UBE2V2	0.0131422
ENSSSCG00000016949	TRAPPC13	0.0132143
ENSSSCG00000000742	ITFG2	0.0132582
ENSSSCG00000014113	HOMER1	0.0132676
ENSSSCG00000005007		0.0132867
ENSSSCG00000011026	ARHGAP12	0.0133141
ENSSSCG00000035794		0.0133553
ENSSSCG00000010452	IFIT1	0.0133696
ENSSSCG00000014147	CCNH	0.0134853
ENSSSCG00000035730	ZDHHC21	0.0135295
ENSSSCG00000037116	ZNRF2	0.0135362
ENSSSCG00000037549	GCLM	0.0136287
ENSSSCG00000006033	EIF3E	0.013673
ENSSSCG00000021451	CGRRF1	0.0136897
ENSSSCG00000001095	GMNN	0.0137388
ENSSSCG00000035965	AQP4	0.013861
ENSSSCG00000011214	NGLY1	0.0138717
ENSSSCG00000031261	RHOQ	0.0139196
ENSSSCG00000024748	THUMPD1	0.0139428
ENSSSCG00000027323	NCBP2	0.0139703
ENSSSCG00000003849	MAGOH	0.0140622
ENSSSCG00000023761	HNRNPR	0.0141724
ENSSSCG00000038987	CCDC59	0.0141833
ENSSSCG00000004792	FAM98B	0.0141935
ENSSSCG00000003859	TUT4	0.0142012
ENSSSCG00000008497	GPATCH11	0.0142643
ENSSSCG00000008828		0.0143079
ENSSSCG00000006756		0.0143218
ENSSSCG00000038410	CPEB2	0.014362
ENSSSCG00000012551	RNF128	0.0143836
ENSSSCG00000015360	ANKMY2	0.0145047
ENSSSCG00000017670	RPS6KB1	0.0145494
ENSSSCG00000036293	SRSF10	0.0145509
ENSSSCG00000007311		0.014559
ENSSSCG00000000522	NAP1L1	0.0145672
ENSSSCG00000012062	TTC3	0.0146779
ENSSSCG00000006282	KIFAP3	0.0150204
ENSSSCG00000004691	EIF3J	0.0150315
ENSSSCG00000036491	PCNP	0.0151079
ENSSSCG00000008400	CFAP36	0.0151103
ENSSSCG00000008517	SPAST	0.0151342
ENSSSCG00000015923	NOSTRIN	0.0151556
ENSSSCG00000004989	FBXO33	0.0151617
ENSSSCG00000015462	TPK1	0.0151893
ENSSSCG00000014292	HSPA4	0.0152132
ENSSSCG00000008496	EIF2AK2	0.0152334
ENSSSCG00000036339	FAM126B	0.015349
ENSSSCG00000005424	NIPSNAP3A	0.0154181
ENSSSCG00000006032	EMC2	0.0155146
ENSSSCG00000007095	POLR3F	0.0155263
ENSSSCG00000038007	HACD1	0.0155301
ENSSSCG00000028516	LARP4	0.0155567
ENSSSCG00000015504	CACYBP	0.0156063
ENSSSCG00000034292	ZMYM1	0.0156437
ENSSSCG00000036206	DIPK2A	0.015708
ENSSSCG00000036885	ZNF654	0.0158012
ENSSSCG00000016918	MAP3K1	0.0158063
ENSSSCG00000038682	TAF1D	0.015857
ENSSSCG00000003776	ACADM	0.0159436
ENSSSCG00000027293	TNPO1	0.0161179
ENSSSCG00000000635	MAGOHB	0.0162159
ENSSSCG00000008099	ZC3H8	0.0162387
ENSSSCG00000037216	PPP4R2	0.0162681
ENSSSCG00000001087	MRS2	0.0163331
ENSSSCG00000026960		0.0165877
ENSSSCG00000033524	KRR1	0.0166142
ENSSSCG00000014100	TBCA	0.0166678
ENSSSCG00000031857	SMIM19	0.0166697
ENSSSCG00000030603	TATDN1	0.0167412
ENSSSCG00000040439	TMED5	0.0168114
ENSSSCG00000015938	SSB	0.0169357
ENSSSCG00000014917	CCDC81	0.0169909
ENSSSCG00000017669	TUBD1	0.0171002
ENSSSCG00000017273	PSMD12	0.0171416
ENSSSCG00000006869	TRMT13	0.0172122
ENSSSCG00000005212	PLGRKT	0.0172686
ENSSSCG00000005466	PTBP3	0.017309
ENSSSCG00000032223	EIF1AX	0.0173264
ENSSSCG00000008406	CCDC88A	0.0173363
ENSSSCG00000013361		0.0173453
ENSSSCG00000003763	IFI44	0.0173533
ENSSSCG00000033602	UBE2K	0.0173824
ENSSSCG00000005038	PSMC6	0.0174101
ENSSSCG00000000529		0.0174168
ENSSSCG00000006874	PALMD	0.0175028
ENSSSCG00000023983	AGPS	0.0176131
ENSSSCG00000010351	CCSER2	0.0176426
ENSSSCG00000014149	MEF2C	0.0177097
ENSSSCG00000027529	BIRC3	0.0177189
ENSSSCG00000015793	UFSP2	0.0177538
ENSSSCG00000000167	RIC8B	0.0177648
ENSSSCG00000031629	MOSMO	0.0179914
ENSSSCG00000004432	HDAC2	0.0180134
ENSSSCG00000016056	GLS	0.018018
ENSSSCG00000035992		0.0180611
ENSSSCG00000015386	FAM126A	0.0180766
ENSSSCG00000006079	RIDA	0.0181031
ENSSSCG00000003798	SERBP1	0.0181239
ENSSSCG00000024696	CCNYL1	0.018137
ENSSSCG00000039549	PLEKHF2	0.0182693
ENSSSCG00000009384	INTS6	0.0182719
ENSSSCG00000014934	CHORDC1	0.0182867
ENSSSCG00000000536	ERGIC2	0.0183757
ENSSSCG00000035663		0.0184334
ENSSSCG00000004647	DTWD1	0.018457
ENSSSCG00000037277	RFK	0.0184767
ENSSSCG00000001959	CFL2	0.0186302
ENSSSCG00000012583	ACSL4	0.0186403
ENSSSCG00000012258	FUNDC1	0.0186804
ENSSSCG00000015755	AGPAT5	0.0187108
ENSSSCG00000017626		0.0187449
ENSSSCG00000003820	USP1	0.0187975
ENSSSCG00000040827		0.0188649
ENSSSCG00000010669	PDZD8	0.0189171
ENSSSCG00000010802	UCHL5	0.0189445
ENSSSCG00000005426	FSD1L	0.0190962
ENSSSCG00000031011	CCDC160	0.0191135
ENSSSCG00000010172		0.0192993
ENSSSCG00000025298	TWISTNB	0.0194075
ENSSSCG00000014244	PHAX	0.0194531
ENSSSCG00000000583	PYROXD1	0.0195144
ENSSSCG00000010897	ZBTB41	0.0195206
ENSSSCG00000016604	WASL	0.0195223
ENSSSCG00000009050	INPP4B	0.0198877
ENSSSCG00000033228	SPAG9	0.0199623
ENSSSCG00000000473		0.0200055
ENSSSCG00000006879	PTBP2	0.0200567
ENSSSCG00000026833	MSANTD4	0.0201075
ENSSSCG00000006192	LACTB2	0.0201076
ENSSSCG00000024983	RSL24D1	0.0201588
ENSSSCG00000004339	UFL1	0.0201621
ENSSSCG00000027857	DMXL1	0.0201628
ENSSSCG00000011997	CHMP2B	0.0203646
ENSSSCG00000011117	UPF2	0.0204971
ENSSSCG00000026617	EIF2S2	0.0205224
ENSSSCG00000003645	UTP11	0.020626
ENSSSCG00000040445	RND3	0.0206378
ENSSSCG00000005047	CDKN3	0.0206662
ENSSSCG00000015689	DARS	0.020821
ENSSSCG00000037461		0.0208966
ENSSSCG00000010209	FAM13C	0.0209437
ENSSSCG00000006867	LRRC39	0.020957
ENSSSCG00000028466	UTP3	0.0209601
ENSSSCG00000015988	HNRNPA3	0.0209728
ENSSSCG00000008072	ASPN	0.0210513
ENSSSCG00000014082	POLK	0.0210543
ENSSSCG00000014909	SYTL2	0.0210859
ENSSSCG00000025287	GIN1	0.0212347
ENSSSCG00000005227	PUM3	0.0213246
ENSSSCG00000038968	TMEM263	0.0213372
ENSSSCG00000034163		0.0213579
ENSSSCG00000016399	STAM2	0.0213586
ENSSSCG00000011491	THOC7	0.0213995
ENSSSCG00000008387	PEX13	0.0214054
ENSSSCG00000000779	KIF21A	0.0215108
ENSSSCG00000015310	AKAP9	0.0215517
ENSSSCG00000010685	TIAL1	0.0215643
ENSSSCG00000016692	TAX1BP1	0.0216099
ENSSSCG00000024193	LYSMD3	0.0216792
ENSSSCG00000014148	TMEM161B	0.0217104
ENSSSCG00000036735	VCPKMT	0.0217832
ENSSSCG00000010238	HNRNPH3	0.0217875
ENSSSCG00000005219	CDC37L1	0.0218267
ENSSSCG00000038505	MSI2	0.021943
ENSSSCG00000039004		0.0219607
ENSSSCG00000031498	PPP2R3C	0.0219785
ENSSSCG00000026382	PPP2R5E	0.0220698
ENSSSCG00000033373	COMMD8	0.0221026
ENSSSCG00000011642	RYK	0.0221159
ENSSSCG00000012811	VBP1	0.0221274
ENSSSCG00000015435	NAMPT	0.0221414
ENSSSCG00000003757	SSX2IP	0.0221753
ENSSSCG00000035493	SACS	0.0221827
ENSSSCG00000037499	NEDD4	0.0222164
ENSSSCG00000015730	NIFK	0.0222495
ENSSSCG00000021562	PLXNA4	0.0222662
ENSSSCG00000004668	SLC30A4	0.0222754
ENSSSCG00000033030	FBXO45	0.0222926
ENSSSCG00000017785	NUFIP2	0.0222987
ENSSSCG00000006845	STXBP3	0.022303
ENSSSCG00000038913	HERC4	0.0223125
ENSSSCG00000036145	PRKAA2	0.022344
ENSSSCG00000014010	MAPK9	0.0223722
ENSSSCG00000026829	MYNN	0.0225561
ENSSSCG00000010188	ABCB10	0.0226133
ENSSSCG00000031882	PNPT1	0.0226329
ENSSSCG00000009169	SLC39A8	0.0226358
ENSSSCG00000039885	PTP4A2	0.0226772
ENSSSCG00000016083	PLCL1	0.0228374
ENSSSCG00000040959	ZNF131	0.0228795
ENSSSCG00000021166	RPAP3	0.0229324
ENSSSCG00000037245	HNRNPDL	0.0229933
ENSSSCG00000000890	NEDD1	0.0230019
ENSSSCG00000025788	ENPP4	0.023008
ENSSSCG00000021738	PTPN2	0.023032
ENSSSCG00000028293	RCOR3	0.0231166
ENSSSCG00000016005	SESTD1	0.0231195
ENSSSCG00000013298	PDHX	0.0231832
ENSSSCG00000025876	PBLD	0.0232334
ENSSSCG00000018086	ND4L	0.0232405
ENSSSCG00000036454	TMEM220	0.0232883
ENSSSCG00000040879	CNBP	0.0232913
ENSSSCG00000033843	ETFRF1	0.0233004
ENSSSCG00000034521	NUDT21	0.023411
ENSSSCG00000006120	OTUD6B	0.0234688
ENSSSCG00000014901	PCF11	0.0236047
ENSSSCG00000035472	TTC9C	0.0236095
ENSSSCG00000018087	ND4	0.0236445
ENSSSCG00000010644	DCLRE1A	0.0237225
ENSSSCG00000026772	C1orf52	0.0238763
ENSSSCG00000031664	SRP9	0.0239192
ENSSSCG00000040863	IPMK	0.0239646
ENSSSCG00000008395	VRK2	0.023984
ENSSSCG00000033753	UBXN2A	0.0240954
ENSSSCG00000037728	ANAPC16	0.0241817
ENSSSCG00000009043	ABCE1	0.0241898
ENSSSCG00000038735	SNAP23	0.0242991
ENSSSCG00000011169	PRXL2C	0.0243058
ENSSSCG00000023326	PNRC2	0.0243062
ENSSSCG00000014129	ZCCHC9	0.0243384
ENSSSCG00000010485	TBC1D12	0.0243535
ENSSSCG00000005166	MLLT3	0.0244
ENSSSCG00000008990		0.0244203
ENSSSCG00000034952	DPM1	0.0244698
ENSSSCG00000036083	PCGF5	0.0245647
ENSSSCG00000036063		0.0245956
ENSSSCG00000027139	FYTTD1	0.0246061
ENSSSCG00000029030	SMCHD1	0.0246665
ENSSSCG00000008866	GUCY1A1	0.0247074
ENSSSCG00000037577	CHAC2	0.0247659
ENSSSCG00000012166	SMS	0.0247677
ENSSSCG00000040202	CRLS1	0.024782
ENSSSCG00000003814	EFCAB7	0.0248059
ENSSSCG00000000462	RXYLT1	0.0248599
ENSSSCG00000004353	CCNC	0.0249066
ENSSSCG00000001974	G2E3	0.0249098
ENSSSCG00000008919	EPHA5	0.0249369
ENSSSCG00000009446	PCDH17	0.0249764
ENSSSCG00000018069	ND2	0.0250675
ENSSSCG00000006261	TCEA1	0.0250712
ENSSSCG00000030002	C18orf21	0.025106
ENSSSCG00000032332	SOCS4	0.0251145
ENSSSCG00000027503	OSBPL8	0.0251511
ENSSSCG00000017555	LUC7L3	0.0252572
ENSSSCG00000024201	TASOR	0.0252715
ENSSSCG00000021918	CEP19	0.0253252
ENSSSCG00000008388	REL	0.0254294
ENSSSCG00000036952	GTPBP8	0.0254324
ENSSSCG00000035634	PLSCR1	0.0254945
ENSSSCG00000027660	IFI44L	0.025504
ENSSSCG00000025912	URI1	0.0255293
ENSSSCG00000013314	QSER1	0.0255561
ENSSSCG00000009505	MBNL2	0.0256509
ENSSSCG00000025653	THOC1	0.0256525
ENSSSCG00000037274	PTMA	0.0256633
ENSSSCG00000015743	PTPN4	0.0257237
ENSSSCG00000008974	SDAD1	0.0257369
ENSSSCG00000004340	FHL5	0.0257417
ENSSSCG00000000925	C12orf29	0.0258264
ENSSSCG00000008989	CNOT6L	0.0258566
ENSSSCG00000016828		0.0258791
ENSSSCG00000006066	RNF19A	0.0258885
ENSSSCG00000001924		0.0259393
ENSSSCG00000010835	AIDA	0.0259402
ENSSSCG00000037655	GABPA	0.0259689
ENSSSCG00000005215	JAK2	0.025992
ENSSSCG00000025701	NCK1	0.0260289
ENSSSCG00000036229	INSIG2	0.0260513
ENSSSCG00000004652	COPS2	0.0260724
ENSSSCG00000034954	C5orf24	0.0261059
ENSSSCG00000004076	MTRF1L	0.0261484
ENSSSCG00000022419	FEM1B	0.0262046
ENSSSCG00000036381	RBMS3	0.0262127
ENSSSCG00000003760	TTLL7	0.0262199
ENSSSCG00000040816	NOL7	0.0262808
ENSSSCG00000004403	CDC40	0.0263037
ENSSSCG00000015952	HAT1	0.0263144
ENSSSCG00000018092	ND6	0.0263175
ENSSSCG00000004166	AHI1	0.0263476
ENSSSCG00000032182	CGGBP1	0.0264299
ENSSSCG00000000541	FAR2	0.0265356
ENSSSCG00000014121	ZFYVE16	0.0265673
ENSSSCG00000026087	GKAP1	0.0265699
ENSSSCG00000008971	USO1	0.0266136
ENSSSCG00000002441	PPP4R3A	0.0266205
ENSSSCG00000016138	ATF1	0.0266375
ENSSSCG00000027211	EPC2	0.0266545
ENSSSCG00000004435	NT5DC1	0.0266714
ENSSSCG00000033791	IMPA1	0.0266752
ENSSSCG00000002877		0.0266934
ENSSSCG00000011465	PDE12	0.0268199
ENSSSCG00000000466	XPOT	0.0268401
ENSSSCG00000032344	KIAA1143	0.0268618
ENSSSCG00000004899	RELCH	0.0268768
ENSSSCG00000004334	MAP3K7	0.0268773
ENSSSCG00000032908	PSMD7	0.0269235
ENSSSCG00000003830	MYSM1	0.0269287
ENSSSCG00000014094		0.0270001
ENSSSCG00000022559	USP14	0.0270951
ENSSSCG00000002445	TRIP11	0.027121
ENSSSCG00000005205	KIAA2026	0.0272355
ENSSSCG00000005241		0.0272506
ENSSSCG00000016954	ERBIN	0.0272541
ENSSSCG00000017671	RNFT1	0.0272662
ENSSSCG00000002245	KATNBL1	0.0273431
ENSSSCG00000026714	TAF9B	0.0274112
ENSSSCG00000004620	MYO5A	0.0275619
ENSSSCG00000010319	SAMD8	0.0275848
ENSSSCG00000008414	ERLEC1	0.0275946
ENSSSCG00000011166	ZMYND11	0.0276274
ENSSSCG00000033154	ARL6IP5	0.0276562
ENSSSCG00000014187	NUDT12	0.0276606
ENSSSCG00000011720	MBNL1	0.0276841
ENSSSCG00000015892	PSMD14	0.0277121
ENSSSCG00000038329	PIGK	0.0277182
ENSSSCG00000000846	HCFC2	0.0277413
ENSSSCG00000036529		0.027795
ENSSSCG00000011213	TOP2B	0.0278687
ENSSSCG00000004592	SLTM	0.0278998
ENSSSCG00000003766	DNAJB4	0.0279778
ENSSSCG00000011956	TRMT10C	0.0280678
ENSSSCG00000008909	CLOCK	0.0280956
ENSSSCG00000016948	TRIM23	0.0281314
ENSSSCG00000009531	TEX30	0.0281515
ENSSSCG00000033049		0.0282049
ENSSSCG00000016330	LRRFIP1	0.028236
ENSSSCG00000023188		0.0282802
ENSSSCG00000016711		0.0283078
ENSSSCG00000002869	LSM14A	0.0283669
ENSSSCG00000011822	OPA1	0.028552
ENSSSCG00000011769	FXR1	0.0285684
ENSSSCG00000016945	PPWD1	0.0286044
ENSSSCG00000016067	STK17B	0.0286301
ENSSSCG00000009172	PPP3CA	0.0286462
ENSSSCG00000014152	MBLAC2	0.0286696
ENSSSCG00000022993	TBC1D8B	0.028671
ENSSSCG00000011917	NAA50	0.0287059
ENSSSCG00000040180	TMEM64	0.0287386
ENSSSCG00000015305	GTPBP10	0.0287493
ENSSSCG00000001074	KDM1B	0.0287543
ENSSSCG00000035013		0.0287941
ENSSSCG00000034616	LRRC58	0.0288059
ENSSSCG00000037305	TMEM33	0.0288236
ENSSSCG00000005778	HSBP1L1	0.0289578
ENSSSCG00000032740	TMEM106B	0.0290224
ENSSSCG00000015948	DYNC1I2	0.0291662
ENSSSCG00000006216	TRIM55	0.0291886
ENSSSCG00000016044	ORMDL1	0.0292221
ENSSSCG00000026389	SYNJ2BP	0.029273
ENSSSCG00000008979	NUP54	0.029333
ENSSSCG00000004986	TRAPPC6B	0.0293557
ENSSSCG00000039421		0.0294763
ENSSSCG00000024635	SPART	0.0294769
ENSSSCG00000015247	ZBTB44	0.0294792
ENSSSCG00000015710	ACTR3	0.0295033
ENSSSCG00000012602		0.0296643
ENSSSCG00000008942	MOB1B	0.0297034
ENSSSCG00000006209	VCPIP1	0.0298677
ENSSSCG00000004415		0.0298924
ENSSSCG00000035432	HDGFL3	0.0299372
ENSSSCG00000006927	PKN2	0.0300061
ENSSSCG00000016961	CDK7	0.0300209
ENSSSCG00000036350	HNRNPA2B1	0.0300244
ENSSSCG00000011542	THUMPD3	0.0300676
ENSSSCG00000009652	KCTD9	0.0300826
ENSSSCG00000012617	UPF3B	0.0301612
ENSSSCG00000015690	UBXN4	0.0301719
ENSSSCG00000040954	CSTF3	0.0302222
ENSSSCG00000001801	BTBD1	0.0302278
ENSSSCG00000012027	ADAMTS5	0.0302443
ENSSSCG00000005984	ZHX1	0.030338
ENSSSCG00000040634	ERP44	0.0303733
ENSSSCG00000034517	ZNF12	0.0303891
ENSSSCG00000016922	GPBP1	0.0303983
ENSSSCG00000016164	IKZF2	0.0304488
ENSSSCG00000022168	APBB2	0.0304584
ENSSSCG00000017672	MED13	0.0306526
ENSSSCG00000023784	SEMA3C	0.0306583
ENSSSCG00000004582	BNIP2	0.030674
ENSSSCG00000022952	NMD3	0.0307832
ENSSSCG00000016076	COQ10B	0.030799
ENSSSCG00000024180	ACBD3	0.0308081
ENSSSCG00000038955	CAMLG	0.0308228
ENSSSCG00000005373	NANS	0.0308497
ENSSSCG00000011882	GOLGB1	0.0309046
ENSSSCG00000038730	ITPRID2	0.0309239
ENSSSCG00000014146	RASA1	0.0309778
ENSSSCG00000024598	PRKAA1	0.0310085
ENSSSCG00000011506	UBA3	0.0310232
ENSSSCG00000006301	TIPRL	0.0310372
ENSSSCG00000004169	HBS1L	0.0310498
ENSSSCG00000008924	UBA6	0.0310699
ENSSSCG00000010628	SHOC2	0.0311725
ENSSSCG00000005072	PSMA3	0.0312427
ENSSSCG00000040702	CCDC174	0.031255
ENSSSCG00000028592	TM2D2	0.0312668
ENSSSCG00000023793	NUP42	0.0312764
ENSSSCG00000021731	WWC2	0.0313306
ENSSSCG00000032198	SPOPL	0.0313913
ENSSSCG00000011933	NECTIN3	0.0314225
ENSSSCG00000012235		0.0314345
ENSSSCG00000007355	TOP1	0.0314532
ENSSSCG00000000798	TWF1	0.0315028
ENSSSCG00000008504	CRIM1	0.0315207
ENSSSCG00000035133	MTMR9	0.0315231
ENSSSCG00000024267	TMEM50A	0.0316018
ENSSSCG00000026098	CMYA5	0.0316513
ENSSSCG00000012037	PAXBP1	0.0317426
ENSSSCG00000032377	RALGAPA1	0.0317769
ENSSSCG00000001041	PAK1IP1	0.0318268
ENSSSCG00000006184	TERF1	0.0318774
ENSSSCG00000031103	TBK1	0.0320054
ENSSSCG00000015455	CUL1	0.0321811
ENSSSCG00000024157	ZNF800	0.0322092
ENSSSCG00000026055		0.0322716
ENSSSCG00000015808	ADAM9	0.0323229
ENSSSCG00000023595	AK3	0.0323841
ENSSSCG00000032563	TMEM39B	0.0324253
ENSSSCG00000031775	YAF2	0.0325312
ENSSSCG00000000587	AEBP2	0.0326681
ENSSSCG00000009436	MTRF1	0.0326845
ENSSSCG00000011684	U2SURP	0.0327182
ENSSSCG00000033323	UBE2D1	0.0328213
ENSSSCG00000006177	UBE2W	0.0328311
ENSSSCG00000033634	ERI1	0.0328441
ENSSSCG00000014969		0.0329381
ENSSSCG00000005043	DDHD1	0.0330618
ENSSSCG00000012434	ATRX	0.0331163
ENSSSCG00000005282	VPS13A	0.0331784
ENSSSCG00000022128	MXI1	0.0331989
ENSSSCG00000035320	ASB14	0.0332389
ENSSSCG00000006024	EBAG9	0.0333849
ENSSSCG00000024132	TMEM47	0.0333912
ENSSSCG00000005273	OSTF1	0.0334693
ENSSSCG00000038469	KLHL7	0.0334879
ENSSSCG00000011699	HPS3	0.0335435
ENSSSCG00000038973	PPP1R12A	0.0335462
ENSSSCG00000023297	SCRN3	0.0335728
ENSSSCG00000012148	SYAP1	0.0335914
ENSSSCG00000021275	DDX52	0.033685
ENSSSCG00000010200	CSGALNACT2	0.0337107
ENSSSCG00000008495	PRKD3	0.0337336
ENSSSCG00000036005	CNEP1R1	0.0337414
ENSSSCG00000021170	FAR1	0.0339227
ENSSSCG00000016872	HMGCS1	0.0340203
ENSSSCG00000016635	CAV2	0.0340424
ENSSSCG00000008346	APLF	0.034109
ENSSSCG00000009345	PDS5B	0.0341141
ENSSSCG00000017308	CDC27	0.0341166
ENSSSCG00000025531	SSPN	0.0341489
ENSSSCG00000011953	ZBTB11	0.0341888
ENSSSCG00000030608	METAP2	0.0342171
ENSSSCG00000022806	LIN7C	0.0342998
ENSSSCG00000011449	GNL3	0.0343019
ENSSSCG00000033295	EIF2S1	0.034338
ENSSSCG00000021393	TRMT1L	0.034338
ENSSSCG00000023829	CCP110	0.034343
ENSSSCG00000021270	THAP2	0.0344159
ENSSSCG00000008832	LRRC66	0.034418
ENSSSCG00000033591	CHD9	0.0344256
ENSSSCG00000034253		0.0344382
ENSSSCG00000006201	ARFGEF1	0.0345251
ENSSSCG00000002447	CPSF2	0.0345395
ENSSSCG00000004626	TMOD3	0.0345995
ENSSSCG00000032092	DDX5	0.0346416
ENSSSCG00000026064		0.0346868
ENSSSCG00000018065	ND1	0.0347642
ENSSSCG00000001080	CDKAL1	0.0349444
ENSSSCG00000024351	MET	0.03499
ENSSSCG00000010882	CNST	0.0350363
ENSSSCG00000008637	TAF1B	0.035165
ENSSSCG00000027176	SACM1L	0.0351668
ENSSSCG00000030289	PTPN11	0.0352107
ENSSSCG00000033095	KIN	0.0352241
ENSSSCG00000004303	RARS2	0.0353697
ENSSSCG00000006418		0.0354077
ENSSSCG00000001958	BAZ1A	0.035428
ENSSSCG00000015313		0.0355223
ENSSSCG00000006892	DNTTIP2	0.0355853
ENSSSCG00000016616	FAM3C	0.0355889
ENSSSCG00000012131	MOSPD2	0.0356012
ENSSSCG00000016888	MOCS2	0.0356467
ENSSSCG00000007487	PFDN4	0.0357192
ENSSSCG00000005271	CARNMT1	0.0357513
ENSSSCG00000029967	PEX1	0.0357731
ENSSSCG00000008137		0.0357767
ENSSSCG00000034493	ST3GAL6	0.0357871
ENSSSCG00000015485	SUCO	0.0358286
ENSSSCG00000034012	CASP3	0.0358382
ENSSSCG00000016907	DHX29	0.0358867
ENSSSCG00000011645	CEP63	0.035945
ENSSSCG00000012435	MAGT1	0.0360516
ENSSSCG00000004946	ZWILCH	0.0360708
ENSSSCG00000031942	YES1	0.0362067
ENSSSCG00000011843	PAK2	0.0362112
ENSSSCG00000015393	DMTF1	0.0363276
ENSSSCG00000026753	OSBPL11	0.0363374
ENSSSCG00000005518		0.0364091
ENSSSCG00000022534	ZNF644	0.0364415
ENSSSCG00000005987	TBC1D31	0.0364874
ENSSSCG00000004938	DENND4A	0.0365719
ENSSSCG00000028902	RB1CC1	0.0366568
ENSSSCG00000032490		0.0366739
ENSSSCG00000002867	CEBPG	0.0366901
ENSSSCG00000004610	CCPG1	0.0367105
ENSSSCG00000003981	ZFP69B	0.0367799
ENSSSCG00000023312	PIN4	0.0368395
ENSSSCG00000006127	NBN	0.0368593
ENSSSCG00000011048	SUV39H2	0.0369288
ENSSSCG00000008385	PUS10	0.0369977
ENSSSCG00000014343		0.037033
ENSSSCG00000032275	MRPS30	0.0370812
ENSSSCG00000004247	ASF1A	0.0370845
ENSSSCG00000009540	LIG4	0.0371556
ENSSSCG00000038861	TM2D1	0.0372148
ENSSSCG00000031541	ARL5A	0.0372227
ENSSSCG00000010952	TUT7	0.0372647
ENSSSCG00000030067	GINM1	0.0373881
ENSSSCG00000000844	NFYB	0.0373899
ENSSSCG00000005368	XPA	0.0373974
ENSSSCG00000010460	RPP30	0.0374358
ENSSSCG00000001966	ARHGAP5	0.0375049
ENSSSCG00000008735	BOD1L1	0.0375261
ENSSSCG00000015931	KLHL41	0.0376119
ENSSSCG00000029518	RIOK3	0.0376472
ENSSSCG00000028458	METTL5	0.0376989
ENSSSCG00000009501		0.0377104
ENSSSCG00000014903	CCDC90B	0.0377214
ENSSSCG00000027007	CEP76	0.0377771
ENSSSCG00000011963	TOMM70	0.0377872
ENSSSCG00000014432	GRPEL2	0.0377965
ENSSSCG00000008179	REV1	0.0378472
ENSSSCG00000005582	STRBP	0.0379256
ENSSSCG00000010360	BMPR1A	0.0379476
ENSSSCG00000039373	SNX24	0.0381718
ENSSSCG00000022634		0.0382997
ENSSSCG00000009298	CDK8	0.0383714
ENSSSCG00000011833	DLG1	0.0384502
ENSSSCG00000034072		0.0384577
ENSSSCG00000014907	CREBZF	0.0385773
ENSSSCG00000037595		0.0385795
ENSSSCG00000022869	BCAP29	0.0385921
ENSSSCG00000004576	RORA	0.0386742
ENSSSCG00000016661	SEPTIN7	0.0387171
ENSSSCG00000028113	CAPZA2	0.0387517
ENSSSCG00000006084	MTDH	0.0388026
ENSSSCG00000033741	NIP7	0.0388185
ENSSSCG00000015222	PUS3	0.0388501
ENSSSCG00000009226	KLHL8	0.0388872
ENSSSCG00000006172	PI15	0.0389358
ENSSSCG00000030484	AHR	0.0389392
ENSSSCG00000008873	GASK1B	0.0389682
ENSSSCG00000004262	KPNA5	0.0390163
ENSSSCG00000028663	RBM25	0.0390644
ENSSSCG00000039285	MFN1	0.0390753
ENSSSCG00000022396	BLZF1	0.0391695
ENSSSCG00000004120	SHPRH	0.0392081
ENSSSCG00000031224		0.0392101
ENSSSCG00000034572	MPHOSPH6	0.039235
ENSSSCG00000009535	EFNB2	0.039345
ENSSSCG00000023062	HTATSF1	0.0393815
ENSSSCG00000005135	MTAP	0.0394058
ENSSSCG00000009180	TRMT10A	0.0394541
ENSSSCG00000004884	TMX3	0.0394703
ENSSSCG00000006220	ARMC1	0.0395416
ENSSSCG00000038076	ATF2	0.0397318
ENSSSCG00000000554	FGFR1OP2	0.0398543
ENSSSCG00000025053	RYBP	0.0399977
ENSSSCG00000021322		0.0400869
ENSSSCG00000031459	KMT5B	0.0401069
ENSSSCG00000005460	DNAJC25	0.0401558
ENSSSCG00000034217	SKA2	0.0403323
ENSSSCG00000026301	RAP2C	0.0403801
ENSSSCG00000010156	ARID4B	0.0404255
ENSSSCG00000012637	KLHL13	0.0405102
ENSSSCG00000025238	SHOX2	0.0405775
ENSSSCG00000037609		0.0407471
ENSSSCG00000011013	WAC	0.0408148
ENSSSCG00000006061		0.0408818
ENSSSCG00000015712	DDX18	0.0408999
ENSSSCG00000003791	SRSF11	0.0409778
ENSSSCG00000029547	NAB1	0.0410772
ENSSSCG00000033692	B3GALNT2	0.0411022
ENSSSCG00000011772		0.0411562
ENSSSCG00000016079	MOBKL3	0.0413428
ENSSSCG00000009435	NAA16	0.0413834
ENSSSCG00000040185	TFAM	0.0413911
ENSSSCG00000011710	EIF2A	0.0414199
ENSSSCG00000027792	C12orf45	0.041567
ENSSSCG00000009010	ARFIP1	0.0416182
ENSSSCG00000007046	TRMT6	0.0416615
ENSSSCG00000037935	CYYR1	0.0417666
ENSSSCG00000015976	LNPK	0.0417944
ENSSSCG00000020885	NUS1	0.0418144
ENSSSCG00000016000		0.0418278
ENSSSCG00000026246	B3GAT2	0.0418545
ENSSSCG00000006193		0.0419436
ENSSSCG00000009825	PPTC7	0.0419578
ENSSSCG00000015962	SP3	0.0419625
ENSSSCG00000023996	CASC4	0.04204
ENSSSCG00000011051	HSPA14	0.0420441
ENSSSCG00000000509	ZFC3H1	0.0420556
ENSSSCG00000000457	USP15	0.0421963
ENSSSCG00000010473	EXOC6	0.0422775
ENSSSCG00000009657	PPP2R2A	0.042314
ENSSSCG00000031212	CHML	0.0423661
ENSSSCG00000012059	HLCS	0.0423882
ENSSSCG00000023187	VAV3	0.0423978
ENSSSCG00000011070	MPP7	0.0424003
ENSSSCG00000038757		0.0424328
ENSSSCG00000004927	CLPX	0.0425872
ENSSSCG00000004893	VPS4B	0.0426386
ENSSSCG00000040920	PRKACB	0.0426662
ENSSSCG00000022161	ZNF251	0.0426789
ENSSSCG00000031954	SLC39A10	0.0426921
ENSSSCG00000001866	RCN2	0.0427419
ENSSSCG00000032468		0.0427676
ENSSSCG00000027340	PI4K2B	0.0428099
ENSSSCG00000015405	CD36	0.0430037
ENSSSCG00000008372	EHBP1	0.0430297
ENSSSCG00000010226	JMJD1C	0.0431645
ENSSSCG00000022780	UGCG	0.0432151
ENSSSCG00000014401	NR3C1	0.0432205
ENSSSCG00000038253	ZNF326	0.0432385
ENSSSCG00000007280	ITCH	0.0433031
ENSSSCG00000011632		0.0435029
ENSSSCG00000016817	TARS	0.0435505
ENSSSCG00000032134		0.0436
ENSSSCG00000035741	TOR1AIP2	0.0436025
ENSSSCG00000004624	MAPK6	0.0436284
ENSSSCG00000012014	BTG3	0.043721
ENSSSCG00000005041	FERMT2	0.0437681
ENSSSCG00000001075	DEK	0.0438
ENSSSCG00000027718	HAUS3	0.0438103
ENSSSCG00000000553	TM7SF3	0.0438217
ENSSSCG00000004832	UBE3A	0.0438522
ENSSSCG00000030617	INTS12	0.0439927
ENSSSCG00000030150	UGDH	0.0440781
ENSSSCG00000038550	SCOC	0.0440965
ENSSSCG00000008890	TMA16	0.0441025
ENSSSCG00000006281	METTL11B	0.0441434
ENSSSCG00000015428	PUS7	0.0441478
ENSSSCG00000016850	LIFR	0.0441564
ENSSSCG00000014255	SLC12A2	0.0441586
ENSSSCG00000027700	RPRD1A	0.0441804
ENSSSCG00000013312	HIPK3	0.0441826
ENSSSCG00000040887	HEATR3	0.044207
ENSSSCG00000011104	CUL2	0.0442991
ENSSSCG00000010171	TSNAX	0.0443966
ENSSSCG00000008347	FBXO48	0.0444077
ENSSSCG00000036210	DYNC1LI2	0.0445214
ENSSSCG00000001947	BRMS1L	0.0445778
ENSSSCG00000004222	NCOA7	0.0445847
ENSSSCG00000004861	TSHZ1	0.0445906
ENSSSCG00000015958	PDK1	0.0446475
ENSSSCG00000035410	IWS1	0.0446892
ENSSSCG00000027652	KLHL15	0.0447023
ENSSSCG00000004294	SYNCRIP	0.0447331
ENSSSCG00000008821	SLAIN2	0.0448427
ENSSSCG00000006848	SLC25A24	0.0448637
ENSSSCG00000035195	HNMT	0.0449591
ENSSSCG00000034373	TNRC6C	0.0450572
ENSSSCG00000014204	DCP2	0.0450706
ENSSSCG00000030413	PIK3CA	0.0450977
ENSSSCG00000011841	SENP5	0.0451574
ENSSSCG00000020906	GHSR	0.0451824
ENSSSCG00000011194	ANKRD28	0.0452229
ENSSSCG00000037602		0.045226
ENSSSCG00000034966	TTC33	0.0452495
ENSSSCG00000013321	ELP4	0.0452809
ENSSSCG00000033703	FAM111A	0.045282
ENSSSCG00000015014	ZC3H12C	0.0453756
ENSSSCG00000001946	MBIP	0.0455234
ENSSSCG00000009341		0.0455422
ENSSSCG00000028538	RLIM	0.0455848
ENSSSCG00000011508		0.0456036
ENSSSCG00000028646	MMADHC	0.0456261
ENSSSCG00000016981	CPEB4	0.0457445
ENSSSCG00000012642	STAG2	0.0458632
ENSSSCG00000028997		0.0458792
ENSSSCG00000016036	WDR75	0.0459005
ENSSSCG00000023247	OPTN	0.0459981
ENSSSCG00000037653	RAB5A	0.0461219
ENSSSCG00000001554	SRPK1	0.0461557
ENSSSCG00000009366		0.0461908
ENSSSCG00000010502	CCNJ	0.0461928
ENSSSCG00000003783	FPGT	0.0463449
ENSSSCG00000014337	ETF1	0.0464097
ENSSSCG00000023908	ETAA1	0.0465139
ENSSSCG00000034427	MEX3C	0.0465951
ENSSSCG00000039935		0.0465963
ENSSSCG00000016027	ITGAV	0.0469094
ENSSSCG00000006889	ARHGAP29	0.0469904
ENSSSCG00000009769	GTF2H3	0.0470842
ENSSSCG00000038853	GPR137B	0.0470881
ENSSSCG00000021306	GJC1	0.0471063
ENSSSCG00000010468	CPEB3	0.0471749
ENSSSCG00000031072	ZNF514	0.0471815
ENSSSCG00000001955	SRP54	0.0472785
ENSSSCG00000028549	ECM2	0.047299
ENSSSCG00000006054	ATP6V1C1	0.0473367
ENSSSCG00000030535	SNX9	0.0473507
ENSSSCG00000031503	PRRX1	0.0474099
ENSSSCG00000025606	ATM	0.047437
ENSSSCG00000010433	SGMS1	0.0474925
ENSSSCG00000037591	AMMECR1	0.0475107
ENSSSCG00000003743	GALNT1	0.0475861
ENSSSCG00000035209		0.0477089
ENSSSCG00000002411	GTF2A1	0.0477601
ENSSSCG00000005039	STYX	0.0478485
ENSSSCG00000004629	LYSMD2	0.0479116
ENSSSCG00000026571	RAB8B	0.0479849
ENSSSCG00000025028	XIAP	0.0480056
ENSSSCG00000004820	LINS1	0.0481222
ENSSSCG00000022048	REEP5	0.0482613
ENSSSCG00000009047	SMARCA5	0.048347
ENSSSCG00000007309	RBM39	0.0483928
ENSSSCG00000010811	KCTD3	0.0485111
ENSSSCG00000014165	TTC37	0.0485892
ENSSSCG00000024396	NOVA1	0.048683
ENSSSCG00000029593	FOXN2	0.0487158
ENSSSCG00000015577	ODR4	0.0488519
ENSSSCG00000015523	RALGPS2	0.0488887
ENSSSCG00000020711	RAB33B	0.0490301
ENSSSCG00000023565	IKZF5	0.0490475
ENSSSCG00000001865	SCAPER	0.0490617
ENSSSCG00000015963	OLA1	0.0491176
ENSSSCG00000006757	TRIM33	0.0491347
ENSSSCG00000020954	PCGF6	0.0491372
ENSSSCG00000014177	CHD1	0.0491453
ENSSSCG00000009113	METTL14	0.0491699
ENSSSCG00000024628	ALKBH8	0.0491823
ENSSSCG00000006137	WWP1	0.0492708
ENSSSCG00000028698	CCDC47	0.0493093
ENSSSCG00000039688		0.0494338
ENSSSCG00000016620	TSPAN12	0.0495133
ENSSSCG00000029125	FAM13B	0.0496096
ENSSSCG00000015402	CACNA2D1	0.0496312
ENSSSCG00000037964		0.0496918
ENSSSCG00000016792	RETREG1	0.0498339
ENSSSCG00000016017	DNAJC10	0.0498344
ENSSSCG00000009425		0.0498585
ENSSSCG00000027905		0.049925
ENSSSCG00000015940	UBR3	0.0500134
ENSSSCG00000010357	WAPL	0.0500476
ENSSSCG00000034407	AMN1	0.0500561
ENSSSCG00000038541	TMEM60	0.0501435
ENSSSCG00000022358	RAB28	0.0502077
ENSSSCG00000008878	PPID	0.0503812
ENSSSCG00000030089	RBM18	0.0503814
ENSSSCG00000018094	CYTB	0.0504336
ENSSSCG00000016019	NCKAP1	0.0505104
ENSSSCG00000039870		0.0505939
ENSSSCG00000035136	SDCCAG8	0.050644
ENSSSCG00000004216	ECHDC1	0.0506555
ENSSSCG00000010672	RAB11FIP2	0.0509926
ENSSSCG00000010674	FAM204A	0.051251
ENSSSCG00000029478	CUL4B	0.0512965
ENSSSCG00000004997	PRPF39	0.0513341
ENSSSCG00000015345	GLCCI1	0.0513395
ENSSSCG00000015537	XPR1	0.0513497
ENSSSCG00000004275	FAM135A	0.0513498
ENSSSCG00000030423	MIER1	0.0513797
ENSSSCG00000017024	CCNG1	0.0514327
ENSSSCG00000005356	DCAF10	0.0514609
ENSSSCG00000014838	PGM2L1	0.0514668
ENSSSCG00000011741	GOLIM4	0.0515061
ENSSSCG00000009591	AUH	0.0516155
ENSSSCG00000015358	CRPPA	0.0516224
ENSSSCG00000005267	ANXA1	0.051683
ENSSSCG00000027846	RRP15	0.0517463
ENSSSCG00000026722	PHF14	0.0517703
ENSSSCG00000038187		0.0518316
ENSSSCG00000006983	CNOT7	0.0518443
ENSSSCG00000004190	STX7	0.0519616
ENSSSCG00000009128	AP1AR	0.0520064
ENSSSCG00000039393	SPRED1	0.05201
ENSSSCG00000011723	MME	0.0520338
ENSSSCG00000013155		0.0520419
ENSSSCG00000030443	INTS13	0.052194
ENSSSCG00000039896	TMEM38B	0.0522861
ENSSSCG00000014998	AASDHPPT	0.0523472
ENSSSCG00000001810	PDE8A	0.0524701
ENSSSCG00000011923	NEPRO	0.052536
ENSSSCG00000015410	PHTF2	0.0525392
ENSSSCG00000010723	ACADSB	0.0526101
ENSSSCG00000017688	GGNBP2	0.0527159
ENSSSCG00000016248	AGFG1	0.0528522
ENSSSCG00000004813	TTC23	0.0528747
ENSSSCG00000005204	RANBP6	0.0529995
ENSSSCG00000028228	XPO1	0.0530614
ENSSSCG00000012474	DIAPH2	0.0530846
ENSSSCG00000021343	ZEB2	0.0532424
ENSSSCG00000028310	DR1	0.0532501
ENSSSCG00000002841	N4BP1	0.0532737
ENSSSCG00000031332	NAA30	0.0533215
ENSSSCG00000003670	RLF	0.0533338
ENSSSCG00000015937	KLHL23	0.0533518
ENSSSCG00000003728	TRAPPC8	0.0533872
ENSSSCG00000035495	KITLG	0.0534167
ENSSSCG00000017301	TLK2	0.0534786
ENSSSCG00000014088	IQGAP2	0.0534822
ENSSSCG00000027457	FBXO22	0.053514
ENSSSCG00000020879	FBXW7	0.0535272
ENSSSCG00000003627	ZMYM4	0.053673
ENSSSCG00000023050	SEPTIN10	0.0536991
ENSSSCG00000024125	KPNA3	0.0537568
ENSSSCG00000040294		0.0537751
ENSSSCG00000011679	ATR	0.0538745
ENSSSCG00000016234	CUL3	0.0539383
ENSSSCG00000039887	MARCH5	0.0539671
ENSSSCG00000040657	STRN3	0.0540858
ENSSSCG00000000549	PPFIBP1	0.054097
ENSSSCG00000026230	SRP19	0.0541298
ENSSSCG00000016068		0.0542791
ENSSSCG00000026719		0.0544164
ENSSSCG00000014913	PICALM	0.054429
ENSSSCG00000031121	TSEN15	0.0545512
ENSSSCG00000004963		0.0546628
ENSSSCG00000028867	PPIL4	0.0546715
ENSSSCG00000009570	MPHOSPH8	0.054691
ENSSSCG00000001487	KLHL31	0.0548228
ENSSSCG00000012452		0.0549181
ENSSSCG00000012649	SMARCA1	0.0549197
ENSSSCG00000009234	ABRAXAS1	0.0549259
ENSSSCG00000004371	CRYBG1	0.0550739
ENSSSCG00000006037	OXR1	0.0551371
ENSSSCG00000014151	CETN3	0.0551644
ENSSSCG00000028925	CEP95	0.0551928
ENSSSCG00000015446	PNPLA8	0.0552443
ENSSSCG00000034607	OGN	0.0553504
ENSSSCG00000011825	ATP13A3	0.0553603
ENSSSCG00000006126	DECR1	0.055363
ENSSSCG00000024622	ZNF667	0.0553803
ENSSSCG00000031354	DMAC2L	0.0554433
ENSSSCG00000015908	TTC21B	0.055463
ENSSSCG00000000512	TBC1D15	0.0555122
ENSSSCG00000007058	PLCB4	0.0555995
ENSSSCG00000004934	DPP8	0.0556051
ENSSSCG00000006251	TGS1	0.0556181
ENSSSCG00000023195		0.0556711
ENSSSCG00000014141	RFESD	0.0557121
ENSSSCG00000000570	C2CD5	0.0557259
ENSSSCG00000011304	ZNF197	0.0558609
ENSSSCG00000006163	PKIA	0.0558772
ENSSSCG00000010315	ADK	0.0558969
ENSSSCG00000006860	SLC30A7	0.0559625
ENSSSCG00000004106	LATS1	0.0560353
ENSSSCG00000022783		0.0561523
ENSSSCG00000013344	ANO5	0.0561638
ENSSSCG00000004639	USP8	0.0561893
ENSSSCG00000027429	YARS2	0.0561895
ENSSSCG00000015314	ANKIB1	0.0562145
ENSSSCG00000027860	ERAP2	0.0562212
ENSSSCG00000036114		0.0562386
ENSSSCG00000015697	CCNT2	0.0563541
ENSSSCG00000011858	ZNF148	0.0563685
ENSSSCG00000005065	AP5M1	0.0564037
ENSSSCG00000013849	TPM4	0.0564226
ENSSSCG00000023409	TIA1	0.0564596
ENSSSCG00000034395	CREB1	0.0565548
ENSSSCG00000033025	C21orf91	0.0568851
ENSSSCG00000038443	ZNF639	0.0569541
ENSSSCG00000004178	SLC18B1	0.0570143
ENSSSCG00000022845	PJA2	0.0570541
ENSSSCG00000009792	ZCCHC8	0.0571118
ENSSSCG00000036139	RRM2B	0.0571722
ENSSSCG00000006903	RPAP2	0.0572177
ENSSSCG00000004358	ASCC3	0.0572722
ENSSSCG00000004897	ZCCHC2	0.0573567
ENSSSCG00000006155	ZBTB10	0.0573712
ENSSSCG00000017836	PAFAH1B1	0.0574276
ENSSSCG00000004908	LMAN1	0.0574511
ENSSSCG00000004221	HINT3	0.0576057
ENSSSCG00000011628	DNAJC13	0.0577078
ENSSSCG00000011978	CPOX	0.0577904
ENSSSCG00000036688		0.0578132
ENSSSCG00000006052	FZD6	0.0580285
ENSSSCG00000004730	TMEM87A	0.0580508
ENSSSCG00000011652	STAG1	0.058064
ENSSSCG00000024419	RBBP8	0.0580681
ENSSSCG00000015327	CASD1	0.0581056
ENSSSCG00000015709	SLC35F5	0.0581782
ENSSSCG00000004542	NARS	0.058227
ENSSSCG00000014126	MSH3	0.0582444
ENSSSCG00000026001	DNAJC1	0.0583639
ENSSSCG00000010470	IDE	0.0584202
ENSSSCG00000005096	HIF1A	0.0584329
ENSSSCG00000022661	FCHO2	0.0584728
ENSSSCG00000014123	FAM151B	0.0584966
ENSSSCG00000039889	ARL14EP	0.0585107
ENSSSCG00000010440		0.0585193
ENSSSCG00000037384	BLOC1S6	0.058556
ENSSSCG00000022173	ANKRD50	0.0585783
ENSSSCG00000021149	RNF217	0.0586342
ENSSSCG00000006718	ZNF697	0.0586394
ENSSSCG00000005066	EXOC5	0.0587449
ENSSSCG00000030697	CAPN7	0.0589449
ENSSSCG00000009084	SPATA5	0.0589996
ENSSSCG00000024197	USP48	0.059004
ENSSSCG00000032752	ZBTB43	0.0590241
ENSSSCG00000015603	LPGAT1	0.0590657
ENSSSCG00000010801	CDC73	0.0591211
ENSSSCG00000010429	PRKG1	0.0591425
ENSSSCG00000004127	PLAGL1	0.0591574
ENSSSCG00000022708	ZNF638	0.059316
ENSSSCG00000026453	ACSM5	0.0593507
ENSSSCG00000006199	PREX2	0.0593599
ENSSSCG00000003995	ZNF606	0.059365
ENSSSCG00000005427		0.059375
ENSSSCG00000026945	LRRC2	0.0595194
ENSSSCG00000027722	BMP2K	0.0596316
ENSSSCG00000006294	NME7	0.0596372
ENSSSCG00000022225	NOP58	0.0597131
ENSSSCG00000021966	TOPBP1	0.0597963
ENSSSCG00000020842	TAF13	0.0598562
ENSSSCG00000008943	SLC4A4	0.0598902
ENSSSCG00000022895	CRYBG3	0.0599504
ENSSSCG00000008608	RDH14	0.0600917
ENSSSCG00000005346	ZCCHC7	0.0601276
ENSSSCG00000023112	PDS5A	0.0601337
ENSSSCG00000024916	DHX36	0.0602843
ENSSSCG00000008617	FAM49A	0.0603299
ENSSSCG00000027459	RNF13	0.0603389
ENSSSCG00000008772	RELL1	0.0603633
ENSSSCG00000002424	SPATA7	0.0603828
ENSSSCG00000012639	THOC2	0.0604847
ENSSSCG00000010250	VPS26A	0.0605075
ENSSSCG00000016147	PIKFYVE	0.0605805
ENSSSCG00000025910	ZNF277	0.060582
ENSSSCG00000037953		0.0605971
ENSSSCG00000003730	RNF138	0.060644
ENSSSCG00000031701	GXYLT1	0.0606697
ENSSSCG00000035505	YTHDC1	0.0607403
ENSSSCG00000022145	RPF1	0.0609191
ENSSSCG00000022387	TBPL1	0.0609816
ENSSSCG00000011745	PRKCI	0.0610249
ENSSSCG00000020931	MSH6	0.0614214
ENSSSCG00000030486	TBC1D23	0.0614665
ENSSSCG00000008573	RAB10	0.061571
ENSSSCG00000003787	ZRANB2	0.0615856
ENSSSCG00000004958	PIAS1	0.0616519
ENSSSCG00000004653	SECISBP2L	0.0617094
ENSSSCG00000024621	KAT2B	0.0619163
ENSSSCG00000010198	BMS1	0.0619228
ENSSSCG00000033377	FOPNL	0.0620221
ENSSSCG00000029621	BMPR1B	0.0620902
ENSSSCG00000000884	APAF1	0.062213
ENSSSCG00000004244	MAN1A1	0.062253
ENSSSCG00000022398	NUCKS1	0.062302
ENSSSCG00000039249		0.062389
ENSSSCG00000011731	SMC4	0.0623948
ENSSSCG00000027432	NSUN3	0.0624617
ENSSSCG00000015443	DLD	0.0627035
ENSSSCG00000004220	TRMT11	0.0627394
ENSSSCG00000008358	ACTR2	0.0628428
ENSSSCG00000005941	KHDRBS3	0.0628664
ENSSSCG00000008069	NOL8	0.0629978
ENSSSCG00000021205	STK26	0.0630188
ENSSSCG00000025290	ZNF596	0.0631134
ENSSSCG00000024555	ING2	0.0632239
ENSSSCG00000012546	NRK	0.0633752
ENSSSCG00000006870		0.0634309
ENSSSCG00000015945	METTL8	0.063596
ENSSSCG00000040912	SNX6	0.0636218
ENSSSCG00000005011	NEMF	0.0637384
ENSSSCG00000034259	PMEPA1	0.0637888
ENSSSCG00000010484	NOC3L	0.063821
ENSSSCG00000023357	REST	0.0638605
ENSSSCG00000016597	POT1	0.0640276
ENSSSCG00000006775	CAPZA1	0.064092
ENSSSCG00000004382	SEC63	0.0641259
ENSSSCG00000032357	APPL1	0.0641387
ENSSSCG00000027738	LRRFIP2	0.0642557
ENSSSCG00000017613	COIL	0.0642603
ENSSSCG00000006864	CDC14A	0.0642633
ENSSSCG00000009524	TMTC4	0.064275
ENSSSCG00000022828	PNN	0.0642921
ENSSSCG00000008494	NDUFAF7	0.0643481
ENSSSCG00000005022	NIN	0.0643621
ENSSSCG00000028444	ARMC10	0.0644481
ENSSSCG00000007235	TPX2	0.0646418
ENSSSCG00000006872	AGL	0.0646496
ENSSSCG00000009420	NUFIP1	0.0647093
ENSSSCG00000029790	PCYOX1	0.0647943
ENSSSCG00000027063	DPY19L1	0.0648555
ENSSSCG00000031170	TMEM123	0.0649121
ENSSSCG00000004110	TAB2	0.0649123
ENSSSCG00000003718	TAF4B	0.0650167
ENSSSCG00000015011		0.0654768
ENSSSCG00000007039	PRNP	0.06554
ENSSSCG00000014211	YTHDC2	0.0655997
ENSSSCG00000033811	CBFB	0.0656403
ENSSSCG00000027509	VPS54	0.0656601
ENSSSCG00000008475	MAP4K3	0.065759
ENSSSCG00000015868	ARL6IP6	0.0658584
ENSSSCG00000028148	DMD	0.0658713
ENSSSCG00000027256	CNIH1	0.0658806
ENSSSCG00000002935		0.0658857
ENSSSCG00000015987	NFE2L2	0.0660203
ENSSSCG00000006968	LONRF1	0.0661117
ENSSSCG00000032838	MYOZ2	0.0661571
ENSSSCG00000002254	NR2F2	0.066194
ENSSSCG00000017623	VEZF1	0.0661955
ENSSSCG00000004785	SRP14	0.066233
ENSSSCG00000012686	MOSPD1	0.0663039
ENSSSCG00000000488	MDM2	0.0664552
ENSSSCG00000026177	SLC25A40	0.0664703
ENSSSCG00000005016	L2HGDH	0.066476
ENSSSCG00000005040	GNPNAT1	0.0666944
ENSSSCG00000007077	ESF1	0.0667386
ENSSSCG00000010246	DDX50	0.0667676
ENSSSCG00000011760	TBL1XR1	0.0668946
ENSSSCG00000002316	COX16	0.0671679
ENSSSCG00000016266	CAB39	0.0672182
ENSSSCG00000016842	NIPBL	0.0672242
ENSSSCG00000010467	BTAF1	0.0673643
ENSSSCG00000025941	PTP4A1	0.0673834
ENSSSCG00000009717	CBR4	0.0674165
ENSSSCG00000016658	ANLN	0.0674435
ENSSSCG00000030408	DDX58	0.0674608
ENSSSCG00000026644	DDX46	0.0676245
ENSSSCG00000009747	STX2	0.0677562
ENSSSCG00000016033	GULP1	0.0678318
ENSSSCG00000035827	CTDSPL2	0.0678337
ENSSSCG00000039469	DNAL1	0.0680925
ENSSSCG00000010627	PDCD4	0.0683757
ENSSSCG00000021946		0.0683811
ENSSSCG00000031808	TM9SF2	0.0684982
ENSSSCG00000006342	UHMK1	0.0685549
ENSSSCG00000031077	KPNA4	0.0687582
ENSSSCG00000024009		0.0687666
ENSSSCG00000027681	ZFR	0.0688891
ENSSSCG00000005021	SAV1	0.0689998
ENSSSCG00000021216	TCEANC2	0.0690893
ENSSSCG00000014023	RUFY1	0.0691344
ENSSSCG00000017038	PWWP2A	0.0692567
ENSSSCG00000018091	ND5	0.0692943
ENSSSCG00000005575	RC3H2	0.0694727
ENSSSCG00000017033	SLU7	0.0695175
ENSSSCG00000014319	SMAD5	0.0696043
ENSSSCG00000007940		0.0697745
ENSSSCG00000010652	FAM160B1	0.0698066
ENSSSCG00000022496	STK39	0.0698483
ENSSSCG00000026922	DRAM2	0.0698755
ENSSSCG00000016098	ORC2	0.0698887
ENSSSCG00000009776	SBNO1	0.0699413
ENSSSCG00000008079	FAM120A	0.069952
ENSSSCG00000009460	DIS3	0.0699823
ENSSSCG00000010904	NEK7	0.0700865
ENSSSCG00000038487	TMPO	0.0701509
ENSSSCG00000037309	TIGD7	0.0702554
ENSSSCG00000014902	ANKRD42	0.0703402
ENSSSCG00000012713	ATP11C	0.0704777
ENSSSCG00000016717	MPP6	0.0705173
ENSSSCG00000003815	ALG6	0.070583
ENSSSCG00000008535	CLIP4	0.0705862
ENSSSCG00000022288	STK38L	0.07089
ENSSSCG00000005037	ERO1A	0.0709319
ENSSSCG00000010911	ZNF281	0.0710227
ENSSSCG00000010941		0.0710483
ENSSSCG00000000847	TDG	0.0711934
ENSSSCG00000021746	MRPL35	0.0713962
ENSSSCG00000015947	DCAF17	0.0714776
ENSSSCG00000030507	SMNDC1	0.0715342
ENSSSCG00000016960	RAD17	0.0715857
ENSSSCG00000032715	CERS6	0.0716095
ENSSSCG00000036634	MAP4K5	0.0716144
ENSSSCG00000007331	RBL1	0.0718673
ENSSSCG00000010621	ADD3	0.0720635
ENSSSCG00000008536		0.0720708
ENSSSCG00000008478	SOS1	0.0720723
ENSSSCG00000016564	UBE2H	0.0723299
ENSSSCG00000017419	DNAJC7	0.0723716
ENSSSCG00000016049	HIBCH	0.0724049
ENSSSCG00000036610	ARMC8	0.0724559
ENSSSCG00000006898	MTF2	0.072565
ENSSSCG00000031123	PPIG	0.0726392
ENSSSCG00000014022	HNRNPH1	0.0726575
ENSSSCG00000006267	PCMTD1	0.0726793
ENSSSCG00000030154	RSBN1	0.0727492
ENSSSCG00000010548	CHUK	0.0730423
ENSSSCG00000016998	NPM1	0.0732641
ENSSSCG00000021774	B3GALNT1	0.0732804
ENSSSCG00000012459	APOOL	0.0733344
ENSSSCG00000004529	POLI	0.0734371
ENSSSCG00000037594	PNISR	0.0734611
ENSSSCG00000026959	NPAT	0.073477
ENSSSCG00000016087	TYW5	0.0735661
ENSSSCG00000033860	ZMAT3	0.0736849
ENSSSCG00000006766	PHTF1	0.0736981
ENSSSCG00000008382	USP34	0.0739652
ENSSSCG00000013602	HNRNPM	0.0740258
ENSSSCG00000008467	EML4	0.0744572
ENSSSCG00000031631	GNL2	0.0745463
ENSSSCG00000029920	ELF2	0.0746766
ENSSSCG00000020853	BTBD3	0.0747226
ENSSSCG00000004104	KATNA1	0.0748478
ENSSSCG00000014170	CAST	0.0748708
ENSSSCG00000011235	UBP1	0.0750273
ENSSSCG00000029485	FBXO11	0.07528
ENSSSCG00000016062	NABP1	0.0753007
ENSSSCG00000003779	TYW3	0.0754461
ENSSSCG00000002627	GSTA4	0.0755541
ENSSSCG00000011881	IQCB1	0.075564
ENSSSCG00000009714	NEK1	0.0756224
ENSSSCG00000015013	RDX	0.0756691
ENSSSCG00000026018	MFSD1	0.0757796
ENSSSCG00000009793	CLIP1	0.0757945
ENSSSCG00000016518	TRIM24	0.0759019
ENSSSCG00000021885	MDFIC	0.0759501
ENSSSCG00000037066	GADD45A	0.0759614
ENSSSCG00000024412	RNF139	0.0760541
ENSSSCG00000036431	VPS13C	0.0760758
ENSSSCG00000029408	ZFP30	0.0763188
ENSSSCG00000029275	PPARGC1A	0.0763292
ENSSSCG00000014114	TENT2	0.0763754
ENSSSCG00000035488	WDR44	0.0765108
ENSSSCG00000024780	ZFAND1	0.0766068
ENSSSCG00000004636	TRPM7	0.0767405
ENSSSCG00000032494	TIMM21	0.0767937
ENSSSCG00000004628	TMOD2	0.0768306
ENSSSCG00000011025	ZEB1	0.0771732
ENSSSCG00000025194	ZSWIM6	0.0771878
ENSSSCG00000033185	PPP2R3A	0.077303
ENSSSCG00000004983		0.0774311
ENSSSCG00000016194	USP37	0.0776815
ENSSSCG00000024904	SEC22A	0.0777201
ENSSSCG00000014416	TCERG1	0.0777368
ENSSSCG00000008335		0.077915
ENSSSCG00000003716	SS18	0.0780607
ENSSSCG00000009414	ZC3H13	0.0780704
ENSSSCG00000015497	KLHL20	0.0781928
ENSSSCG00000009480	NDFIP2	0.0783606
ENSSSCG00000004441	DSE	0.078743
ENSSSCG00000040731	TMEM65	0.0787668
ENSSSCG00000004249	CEP85L	0.0788012
ENSSSCG00000022611	CAPRIN2	0.0789992
ENSSSCG00000011874	PARP14	0.0790327
ENSSSCG00000008808	GNPDA2	0.079161
ENSSSCG00000021184	OSGIN2	0.0792949
ENSSSCG00000022430	SLC30A5	0.0794691
ENSSSCG00000004747	RTF1	0.0794887
ENSSSCG00000011085	MLLT10	0.0797303
ENSSSCG00000038772	IKBIP	0.0797355
ENSSSCG00000035639	TERB1	0.0798696
ENSSSCG00000014009	CNOT6	0.0798728
ENSSSCG00000012203	TAB3	0.0799214
ENSSSCG00000012463	CHM	0.079978
ENSSSCG00000038867	PPM1K	0.0800012
ENSSSCG00000000840	WASHC4	0.0800432
ENSSSCG00000029113	OBI1	0.0801619
ENSSSCG00000000795	ADAMTS20	0.080272
ENSSSCG00000004241	GJA1	0.0803203
ENSSSCG00000016911	MTREX	0.0804049
ENSSSCG00000003762	ADGRL4	0.0804608
ENSSSCG00000009372	MRPS31	0.0806194
ENSSSCG00000039137	SMARCE1	0.0808643
ENSSSCG00000014997		0.0810639
ENSSSCG00000017605	MMD	0.0811
ENSSSCG00000022159	FNDC3A	0.0811623
ENSSSCG00000010679	EIF3A	0.0813145
ENSSSCG00000002287	MPP5	0.0814092
ENSSSCG00000010877	HNRNPU	0.08169
ENSSSCG00000039397	ETNK1	0.0817328
ENSSSCG00000012608	ZBTB33	0.0818259
ENSSSCG00000032372	ZFP90	0.0818904
ENSSSCG00000007520	GNAS	0.0819433
ENSSSCG00000008988	CCNG2	0.0821267
ENSSSCG00000005127		0.0821552
ENSSSCG00000010508	TM9SF3	0.0822404
ENSSSCG00000005183	PSIP1	0.082331
ENSSSCG00000005015	SOS2	0.0823938
ENSSSCG00000013402	USP47	0.0825761
ENSSSCG00000011332	SETD2	0.0830275
ENSSSCG00000027774	ZFP28	0.0831062
ENSSSCG00000011233	DYNC1LI1	0.0831142
ENSSSCG00000009397	CAB39L	0.0831659
ENSSSCG00000024529	TRMT5	0.0834516
ENSSSCG00000004172	SLC2A12	0.0834719
ENSSSCG00000022011	NMI	0.0837676
ENSSSCG00000034618	ZMYM6	0.0839921
ENSSSCG00000009449	TDRD3	0.0843251
ENSSSCG00000039221	MOB1A	0.0843601
ENSSSCG00000003792		0.0844331
ENSSSCG00000014074	GFM2	0.0844827
ENSSSCG00000035259	PHF3	0.0845668
ENSSSCG00000021793	SMIM14	0.0846605
ENSSSCG00000008360	CEP68	0.0847447
ENSSSCG00000029367		0.0851786
ENSSSCG00000008833		0.0852875
ENSSSCG00000035520		0.0854992
ENSSSCG00000031598	CDADC1	0.08551
ENSSSCG00000023724	ZBTB1	0.085616
ENSSSCG00000017047	CLINT1	0.0857118
ENSSSCG00000015969	CHRNA1	0.0858696
ENSSSCG00000004029	QKI	0.0859198
ENSSSCG00000009042	OTUD4	0.0859627
ENSSSCG00000001971	HECTD1	0.086055
ENSSSCG00000001963	EGLN3	0.0861324
ENSSSCG00000002446		0.0862547
ENSSSCG00000009774	C12orf65	0.0862613
ENSSSCG00000016834	LMBRD2	0.0863989
ENSSSCG00000034711		0.0865082
ENSSSCG00000015309	MTERF1	0.0865637
ENSSSCG00000014041	MXD3	0.0865999
ENSSSCG00000015944	TLK1	0.0866965
ENSSSCG00000008518	SLC30A6	0.0867126
ENSSSCG00000030502	CEP170	0.0867174
ENSSSCG00000016223	ACSL3	0.0869811
ENSSSCG00000037575	FKBP14	0.0870236
ENSSSCG00000028065	USPL1	0.0873043
ENSSSCG00000015791	CFAP97	0.0873457
ENSSSCG00000011929	SLC35A5	0.0875426
ENSSSCG00000026294	GMFB	0.0875955
ENSSSCG00000035430	YPEL3	0.087615
ENSSSCG00000014199	WDR36	0.0879093
ENSSSCG00000008437	SOCS5	0.0879372
ENSSSCG00000008339	GFPT1	0.0879846
ENSSSCG00000036828	SNX4	0.0880144
ENSSSCG00000005255		0.0880418
ENSSSCG00000004603	RFX7	0.0880441
ENSSSCG00000005950	PHF20L1	0.0882524
ENSSSCG00000028258	AZI2	0.0882654
ENSSSCG00000004625	LEO1	0.0883263
ENSSSCG00000017014	PANK3	0.0883999
ENSSSCG00000009541	ABHD13	0.0884409
ENSSSCG00000005403	SMC2	0.0886748
ENSSSCG00000029385	LIAS	0.088704
ENSSSCG00000004130		0.0888048
ENSSSCG00000022942	PHF6	0.0889038
ENSSSCG00000004088	ARMT1	0.0889253
ENSSSCG00000029348	THAP6	0.0889465
ENSSSCG00000005997	COL14A1	0.0889689
ENSSSCG00000017514	KPNB1	0.0889958
ENSSSCG00000012264		0.0890826
ENSSSCG00000014304	SEC24A	0.0890859
ENSSSCG00000008901	PAICS	0.089246
ENSSSCG00000013715		0.0894593
ENSSSCG00000033763	GNAQ	0.0894861
ENSSSCG00000036075	WASHC3	0.0897801
ENSSSCG00000008336	ANXA4	0.0898816
ENSSSCG00000008583	ITSN2	0.0900315
ENSSSCG00000011064	ACBD5	0.0903186
ENSSSCG00000002378	MLH3	0.0903419
ENSSSCG00000033786		0.0907084
ENSSSCG00000014239	CEP120	0.091047
ENSSSCG00000005173	HAUS6	0.0910705
ENSSSCG00000033669	RDH10	0.0912121
ENSSSCG00000006063	PABPC1	0.0913426
ENSSSCG00000006151	SNX16	0.0913527
ENSSSCG00000005083	DHRS7	0.0913594
ENSSSCG00000035281	ZNF292	0.091371
ENSSSCG00000010863	AHCTF1	0.091427
ENSSSCG00000008448	PREPL	0.0914522
ENSSSCG00000032023		0.0914928
ENSSSCG00000024623	USP25	0.0919017
ENSSSCG00000012523	TCEAL8	0.0921114
ENSSSCG00000006730	MAN1A2	0.0924125
ENSSSCG00000016061	MYO1B	0.0924585
ENSSSCG00000016958	PIK3R1	0.0926857
ENSSSCG00000008368	UGP2	0.0927241
ENSSSCG00000022830	KANSL1L	0.0928236
ENSSSCG00000000901	FGD6	0.0929813
ENSSSCG00000012163	RPS6KA3	0.0931799
ENSSSCG00000008940	GRSF1	0.0932185
ENSSSCG00000001756	IREB2	0.0933156
ENSSSCG00000016968	BDP1	0.0934258
ENSSSCG00000030528	LTN1	0.0934957
ENSSSCG00000011284	NKTR	0.093576
ENSSSCG00000024127	ABI1	0.0935952
ENSSSCG00000039854		0.0936287
ENSSSCG00000016104	TRAK2	0.093746
ENSSSCG00000017042	UBLCP1	0.0938988
ENSSSCG00000004139	ADGRG6	0.0940646
ENSSSCG00000016836	NADK2	0.0941331
ENSSSCG00000032726	SREK1	0.0942998
ENSSSCG00000016853	RICTOR	0.0943428
ENSSSCG00000003772		0.0945383
ENSSSCG00000004695	WDR76	0.0949165
ENSSSCG00000016116	WDR12	0.095003
ENSSSCG00000014139	ARSK	0.0952182
ENSSSCG00000014414		0.0953277
ENSSSCG00000027902	ZMPSTE24	0.0953427
ENSSSCG00000013367	GTF2H1	0.0954253
ENSSSCG00000039613		0.0957191
ENSSSCG00000014946	CEP295	0.0957822
ENSSSCG00000009072		0.0958569
ENSSSCG00000011229	STT3B	0.0959306
ENSSSCG00000017601	TOM1L1	0.0960365
ENSSSCG00000009419		0.0962475
ENSSSCG00000014028	CLK4	0.0967175
ENSSSCG00000010438	ATAD1	0.0968625
ENSSSCG00000009787	CCDC62	0.0970414
ENSSSCG00000026954	TMEM87B	0.0978061
ENSSSCG00000014223	COMMD10	0.0978249
ENSSSCG00000011946	ALCAM	0.0978377
ENSSSCG00000015407	GNAI1	0.0979038
ENSSSCG00000034398	C8orf37	0.0979047
ENSSSCG00000004314	PM20D2	0.0981786
ENSSSCG00000015566	EDEM3	0.0984471
ENSSSCG00000028585	CBLL1	0.0984999
ENSSSCG00000004617	FAM214A	0.0985362
ENSSSCG00000029615	VAMP7	0.0988596
ENSSSCG00000000657		0.0989354
ENSSSCG00000033155	TMEM30A	0.0989417
ENSSSCG00000040459		0.0990279
ENSSSCG00000015411	PTPN12	0.0991337
ENSSSCG00000036855	SLC25A36	0.0992907
ENSSSCG00000030679	C14orf28	0.0993136
ENSSSCG00000004595	ADAM10	0.0994926
ENSSSCG00000022656	SRFBP1	0.0995899
ENSSSCG00000006841	CLCC1	0.0998156
ENSSSCG00000032846	IMPAD1	0.0998484
ENSSSCG00000009242	LIN54	0.0999483
ENSSSCG00000008423	PPP1R21	0.099952
ENSSSCG00000023630	CPM	0.100016
ENSSSCG00000027898	ATP2B1	0.100169
ENSSSCG00000009730	ZNF26	0.100411
ENSSSCG00000010814	ESRRG	0.100427
ENSSSCG00000035101	KLF5	0.100431
ENSSSCG00000015568	RNF2	0.100494
ENSSSCG00000033812		0.100821
ENSSSCG00000014081	CERT1	0.101096
ENSSSCG00000006110	RBM12B	0.101391
ENSSSCG00000010688	MCMBP	0.101551
ENSSSCG00000015482	VAMP4	0.101857
ENSSSCG00000011101	ITGB1	0.10204
ENSSSCG00000011949	CEP97	0.102071
ENSSSCG00000002865	GPATCH1	0.102093
ENSSSCG00000004383	OSTM1	0.102192
ENSSSCG00000029352	CCNL1	0.102251
ENSSSCG00000005191	MPDZ	0.102409
ENSSSCG00000017673	INTS2	0.10248
ENSSSCG00000016659	KIAA0895	0.102502
ENSSSCG00000022868	KCTD4	0.102841
ENSSSCG00000034442		0.103244
ENSSSCG00000008801	SLC30A9	0.103417
ENSSSCG00000030660	PDIK1L	0.10368
ENSSSCG00000010235	SIRT1	0.103852
ENSSSCG00000021893	ROCK1	0.103992
ENSSSCG00000037821	RGS5	0.10416
ENSSSCG00000015430	RINT1	0.104168
ENSSSCG00000009401	RB1	0.104189
ENSSSCG00000003512	EIF4G3	0.104304
ENSSSCG00000031680	GGPS1	0.104406
ENSSSCG00000015842	PPP2CB	0.104441
ENSSSCG00000032261	CCDC117	0.104781
ENSSSCG00000026894	NFE2L3	0.104847
ENSSSCG00000023727	TRIM37	0.104899
ENSSSCG00000014217	FEM1C	0.104964
ENSSSCG00000011951	NFKBIZ	0.105301
ENSSSCG00000008831	DCUN1D4	0.105407
ENSSSCG00000016095	CLK1	0.105673
ENSSSCG00000029539	RAB23	0.106077
ENSSSCG00000037483	RFTN2	0.106116
ENSSSCG00000034795	SCAMP1	0.106167
ENSSSCG00000001002	PRPF4B	0.1063
ENSSSCG00000002931	ZNF565	0.10677
ENSSSCG00000012055	MORC3	0.107294
ENSSSCG00000004917	MALT1	0.1073
ENSSSCG00000016075	SF3B1	0.107432
ENSSSCG00000026232	FAM184B	0.107669
ENSSSCG00000038156	TMED7	0.107887
ENSSSCG00000015965	GPR155	0.10792
ENSSSCG00000011899	CD80	0.10818
ENSSSCG00000011510	TMF1	0.108483
ENSSSCG00000014207	APC	0.108512
ENSSSCG00000002252	ARRDC4	0.108532
ENSSSCG00000040013	MTUS1	0.108594
ENSSSCG00000008787	KLHL5	0.108729
ENSSSCG00000023174	USP53	0.10876
ENSSSCG00000016118	CYP20A1	0.108913
ENSSSCG00000021802	ABHD17B	0.109015
ENSSSCG00000017744	SUZ12	0.109026
ENSSSCG00000005058	ATG14	0.109032
ENSSSCG00000008591	ATAD2B	0.109053
ENSSSCG00000032583	SRSF5	0.109287
ENSSSCG00000024232	CCDC91	0.109347
ENSSSCG00000025087	ASPH	0.109348
ENSSSCG00000032561	PDCD1LG2	0.109514
ENSSSCG00000037598	SNX10	0.109813
ENSSSCG00000016123	PARD3B	0.109897
ENSSSCG00000018029		0.11014
ENSSSCG00000004663	SEMA6D	0.110247
ENSSSCG00000005364		0.110542
ENSSSCG00000030682	MACO1	0.110576
ENSSSCG00000004524	SMAD4	0.110807
ENSSSCG00000011511	FRMD4B	0.110977
ENSSSCG00000040639		0.111025
ENSSSCG00000016653	DNAJB9	0.111101
ENSSSCG00000017668	VMP1	0.11119
ENSSSCG00000005354	TRMT10B	0.111554
ENSSSCG00000040073	MZT1	0.111722
ENSSSCG00000004306	ORC3	0.111737
ENSSSCG00000011795	IGF2BP2	0.111769
ENSSSCG00000005506	MEGF9	0.111913
ENSSSCG00000001731	CENPQ	0.112288
ENSSSCG00000015670	GTDC1	0.112304
ENSSSCG00000036480	CTNNA3	0.11263
ENSSSCG00000016535	CALD1	0.112869
ENSSSCG00000014955	MRE11	0.11307
ENSSSCG00000027230	SLC35G1	0.113294
ENSSSCG00000036057	POLG2	0.113323
ENSSSCG00000009729	ZNF84	0.113346
ENSSSCG00000012520		0.113429
ENSSSCG00000008600	PUM2	0.11343
ENSSSCG00000009766	ATP6V0A2	0.113585
ENSSSCG00000036546	RNF141	0.113664
ENSSSCG00000025744	KDSR	0.113692
ENSSSCG00000008773	PGM2	0.114031
ENSSSCG00000010454	IFIT5	0.114675
ENSSSCG00000012202		0.114694
ENSSSCG00000006346	ATF6	0.114732
ENSSSCG00000011081		0.114856
ENSSSCG00000010687	INPP5F	0.115471
ENSSSCG00000016031	CALCRL	0.115649
ENSSSCG00000016916	IL6ST	0.115736
ENSSSCG00000038639	TOM1L2	0.115923
ENSSSCG00000012029	BACH1	0.117059
ENSSSCG00000027765	TOGARAM1	0.11706
ENSSSCG00000008857	MSMO1	0.117114
ENSSSCG00000017259	PRKAR1A	0.117361
ENSSSCG00000027455	SLC39A6	0.117722
ENSSSCG00000023294	KRCC1	0.118109
ENSSSCG00000012486	CSTF2	0.118115
ENSSSCG00000004143	TXLNB	0.118316
ENSSSCG00000003076		0.118376
ENSSSCG00000009093	BBS7	0.11916
ENSSSCG00000009369	COG6	0.11956
ENSSSCG00000007381	YWHAB	0.119673
ENSSSCG00000013523	SAFB2	0.119709
ENSSSCG00000004821	ASB7	0.119937
ENSSSCG00000016619	ING3	0.120109
ENSSSCG00000000486	NUP107	0.120118
ENSSSCG00000001070	FAM8A1	0.120614
ENSSSCG00000021038	NRIP1	0.120632
ENSSSCG00000040199	AFG1L	0.12127
ENSSSCG00000011045	MINDY3	0.121332
ENSSSCG00000038953	UBE2B	0.121484
ENSSSCG00000033528	BPTF	0.121559
ENSSSCG00000009967	PITPNB	0.121572
ENSSSCG00000009361	POSTN	0.121704
ENSSSCG00000039663	TWSG1	0.121778
ENSSSCG00000038931	C6orf120	0.121825
ENSSSCG00000004324		0.122016
ENSSSCG00000035676	G3BP1	0.122269
ENSSSCG00000010645	NHLRC2	0.122275
ENSSSCG00000008788	RFC1	0.122674
ENSSSCG00000014915	EED	0.122921
ENSSSCG00000025703	REV3L	0.123008
ENSSSCG00000014195	MAN2A1	0.123056
ENSSSCG00000008150	TMEM182	0.123195
ENSSSCG00000028336	YIPF6	0.123409
ENSSSCG00000023873	AZIN1	0.123526
ENSSSCG00000035658	VPS36	0.123582
ENSSSCG00000029082	KMT2E	0.123975
ENSSSCG00000012634	DOCK11	0.123996
ENSSSCG00000011500	KBTBD8	0.124016
ENSSSCG00000004121	FBXO30	0.124444
ENSSSCG00000029200	TRIM2	0.124533
ENSSSCG00000032529		0.124541
ENSSSCG00000017752	WSB1	0.124731
ENSSSCG00000010151	LYST	0.124763
ENSSSCG00000039338	SUGT1	0.125086
ENSSSCG00000017678	APPBP2	0.125569
ENSSSCG00000008428	MSH2	0.125782
ENSSSCG00000014324	MYOT	0.126158
ENSSSCG00000015576	TPR	0.126336
ENSSSCG00000008540	PPP1CB	0.126809
ENSSSCG00000023850		0.126976
ENSSSCG00000035114		0.126984
ENSSSCG00000012620	NKRF	0.127378
ENSSSCG00000030685	ARID2	0.127622
ENSSSCG00000004535	TCF4	0.127708
ENSSSCG00000036050	CD302	0.128029
ENSSSCG00000000808	SLC38A2	0.128278
ENSSSCG00000040855	C5orf51	0.128456
ENSSSCG00000032978		0.128528
ENSSSCG00000016094	BZW1	0.128626
ENSSSCG00000017895	RABEP1	0.128657
ENSSSCG00000009887	NAA25	0.128757
ENSSSCG00000003741		0.12886
ENSSSCG00000032313	POGLUT1	0.128886
ENSSSCG00000034139	EYA4	0.128941
ENSSSCG00000011514	MITF	0.129826
ENSSSCG00000006074	STK3	0.129841
ENSSSCG00000005089	SIX4	0.129848
ENSSSCG00000016101	CFLAR	0.129885
ENSSSCG00000016275	NCL	0.129889
ENSSSCG00000016866	GHR	0.12994
ENSSSCG00000012613	NKAP	0.129946
ENSSSCG00000015659	YOD1	0.130585
ENSSSCG00000004607	PYGO1	0.130609
ENSSSCG00000035824	PBRM1	0.130618
ENSSSCG00000034348	NBEA	0.130786
ENSSSCG00000021712	HERC6	0.130789
ENSSSCG00000005955	EFR3A	0.131335
ENSSSCG00000021741	ZNF527	0.131543
ENSSSCG00000009090	KIAA1109	0.131854
ENSSSCG00000021466	BMT2	0.131911
ENSSSCG00000038994	CLIC4	0.132164
ENSSSCG00000036052		0.132244
ENSSSCG00000009491	TGDS	0.132437
ENSSSCG00000021791	SENP7	0.133286
ENSSSCG00000000952	ZDHHC17	0.133295
ENSSSCG00000001918	NPTN	0.133461
ENSSSCG00000009049	USP38	0.13354
ENSSSCG00000011727	PTX3	0.133576
ENSSSCG00000011501	SUCLG2	0.133618
ENSSSCG00000037592	SLF2	0.13372
ENSSSCG00000017592	MBTD1	0.133895
ENSSSCG00000031461	ZKSCAN1	0.133913
ENSSSCG00000026082	DNAJC3	0.133968
ENSSSCG00000011066		0.134256
ENSSSCG00000009472	FBXL3	0.134524
ENSSSCG00000028345		0.134578
ENSSSCG00000012112	ARHGAP6	0.134604
ENSSSCG00000004634	AP4E1	0.134782
ENSSSCG00000033844	CYP1B1	0.134948
ENSSSCG00000022903	NAPEPLD	0.135153
ENSSSCG00000009327		0.135743
ENSSSCG00000012007	HSPA13	0.135796
ENSSSCG00000006073	OSR2	0.135801
ENSSSCG00000004414	CD164	0.13582
ENSSSCG00000009408	LRCH1	0.13667
ENSSSCG00000022636	DENND5B	0.137311
ENSSSCG00000011218	SLC4A7	0.137531
ENSSSCG00000026697	UHRF1BP1L	0.13763
ENSSSCG00000013399	TEAD1	0.137785
ENSSSCG00000000902	NR2C1	0.138846
ENSSSCG00000039876		0.139701
ENSSSCG00000014203	MCC	0.139778
ENSSSCG00000001732	MMUT	0.139872
ENSSSCG00000038623	TMED1	0.139887
ENSSSCG00000011300	EXOSC7	0.139933
ENSSSCG00000032094	DKK2	0.14013
ENSSSCG00000033527	ITFG1	0.140255
ENSSSCG00000011467	DENND6A	0.140316
ENSSSCG00000038873	SLMAP	0.140766
ENSSSCG00000004203	L3MBTL3	0.140809
ENSSSCG00000025139	ZNF507	0.141266
ENSSSCG00000032086	ZNF583	0.141677
ENSSSCG00000000793	PPHLN1	0.142071
ENSSSCG00000011854	LRCH3	0.142533
ENSSSCG00000007047		0.14266
ENSSSCG00000040801		0.142721
ENSSSCG00000008451		0.142908
ENSSSCG00000032176	SMURF2	0.143104
ENSSSCG00000003072	ZNF283	0.143173
ENSSSCG00000037204	ZNF248	0.143184
ENSSSCG00000033909		0.143272
ENSSSCG00000015315	RBM48	0.143343
ENSSSCG00000016986	CREBRF	0.143547
ENSSSCG00000008480		0.143743
ENSSSCG00000034418	CREBL2	0.143985
ENSSSCG00000004577	ICE2	0.144105
ENSSSCG00000010396	PARG	0.144286
ENSSSCG00000000895	SNRPF	0.144618
ENSSSCG00000009106	PDE5A	0.144961
ENSSSCG00000037420	TMEM170B	0.145057
ENSSSCG00000038632	ADNP2	0.145133
ENSSSCG00000004500	C18orf25	0.145139
ENSSSCG00000027017		0.145655
ENSSSCG00000035684	TMED10	0.146437
ENSSSCG00000014190	FBXL17	0.146782
ENSSSCG00000008404	MTIF2	0.146961
ENSSSCG00000013347	PRMT3	0.147599
ENSSSCG00000006252	TMEM68	0.147709
ENSSSCG00000022073	ZBTB38	0.147951
ENSSSCG00000024972	CCDC25	0.148026
ENSSSCG00000031337	SNX18	0.148166
ENSSSCG00000010247	DDX21	0.148189
ENSSSCG00000008499	STRN	0.148449
ENSSSCG00000005749	BRD3	0.148634
ENSSSCG00000037977	ALMS1	0.14867
ENSSSCG00000016835	SKP2	0.148956
ENSSSCG00000029174	CCDC126	0.149435
ENSSSCG00000009850	TAOK3	0.149692
ENSSSCG00000008111	NPHP1	0.150903
ENSSSCG00000015522	ANGPTL1	0.151463
ENSSSCG00000010212		0.151613
ENSSSCG00000005170	DENND4C	0.152418
ENSSSCG00000007460	ARFGEF2	0.152448
ENSSSCG00000010831	DUSP10	0.15261
ENSSSCG00000006260	LYPLA1	0.152953
ENSSSCG00000006340	UAP1	0.153374
ENSSSCG00000008374	B3GNT2	0.153574
ENSSSCG00000000927	TMTC3	0.153693
ENSSSCG00000004996	KLHL28	0.153938
ENSSSCG00000004717	UBR1	0.153961
ENSSSCG00000035196	BTBD8	0.154264
ENSSSCG00000029633	USP24	0.15435
ENSSSCG00000004293	SNX14	0.154559
ENSSSCG00000028433	DUS4L	0.154768
ENSSSCG00000011010	C9orf72	0.154948
ENSSSCG00000036488	KLF3	0.155083
ENSSSCG00000039472	SLC30A1	0.155435
ENSSSCG00000003326	PEG3	0.155493
ENSSSCG00000011497	MAGI1	0.155804
ENSSSCG00000035544		0.157602
ENSSSCG00000003401	KIF1B	0.157667
ENSSSCG00000001708	CDC5L	0.157673
ENSSSCG00000015589	VASH2	0.157704
ENSSSCG00000005087	SIX1	0.15771
ENSSSCG00000006894	FNBP1L	0.159361
ENSSSCG00000027528	TMEM107	0.1609
ENSSSCG00000006135	CPNE3	0.161085
ENSSSCG00000009771	DDX55	0.162019
ENSSSCG00000003729	RNF125	0.162074
ENSSSCG00000023955	RAD51C	0.162446
ENSSSCG00000009222	SPARCL1	0.163516
ENSSSCG00000008389	PAPOLG	0.163581
ENSSSCG00000036169	UMAD1	0.163927
ENSSSCG00000005078	DAAM1	0.164036
ENSSSCG00000016156	ACADL	0.164048
ENSSSCG00000005399	RNF20	0.164996
ENSSSCG00000012742	MTM1	0.16504
ENSSSCG00000032575	ZBTB26	0.16526
ENSSSCG00000009030	PRMT9	0.165305
ENSSSCG00000014240	CSNK1G3	0.165389
ENSSSCG00000010699	ATE1	0.165542
ENSSSCG00000017733	C17orf75	0.16582
ENSSSCG00000000502	CNOT2	0.16603
ENSSSCG00000006014	RAD21	0.166195
ENSSSCG00000011463	IL17RD	0.166375
ENSSSCG00000037314	TMCO1	0.166763
ENSSSCG00000016928	RAB3D	0.167061
ENSSSCG00000040713	TXLNG	0.167415
ENSSSCG00000039953	PNRC1	0.168383
ENSSSCG00000024027	PAFAH1B2	0.168745
ENSSSCG00000004921	ATP8B1	0.168871
ENSSSCG00000002688	PLCG2	0.169305
ENSSSCG00000004479	FILIP1	0.169319
ENSSSCG00000031288		0.170178
ENSSSCG00000031614	SMCO1	0.170493
ENSSSCG00000000469	LEMD3	0.170616
ENSSSCG00000014225	DTWD2	0.170879
ENSSSCG00000002266		0.171256
ENSSSCG00000010483	PLCE1	0.171348
ENSSSCG00000006564		0.17144
ENSSSCG00000004279	OGFRL1	0.17161
ENSSSCG00000028558	SGPP1	0.171719
ENSSSCG00000034879	MAML2	0.172455
ENSSSCG00000006939	ZNHIT6	0.172583
ENSSSCG00000029393	CENPJ	0.173288
ENSSSCG00000008737	C1QTNF7	0.174921
ENSSSCG00000011848	TFRC	0.175136
ENSSSCG00000028740	CTDSPL	0.175362
ENSSSCG00000029886	LYVE1	0.175717
ENSSSCG00000012659	ZNF280C	0.175928
ENSSSCG00000008298	DUSP11	0.176259
ENSSSCG00000011201	SATB1	0.176284
ENSSSCG00000009655	EBF2	0.17654
ENSSSCG00000027074	FER	0.177305
ENSSSCG00000021646	KLF9	0.177342
ENSSSCG00000022982	VPS50	0.177823
ENSSSCG00000037134		0.177975
ENSSSCG00000002387	GPATCH2L	0.177981
ENSSSCG00000014221	LVRN	0.178267
ENSSSCG00000015692	R3HDM1	0.178433
ENSSSCG00000030005	LGALSL	0.179965
ENSSSCG00000011767	TTC14	0.180902
ENSSSCG00000004600	TCF12	0.18148
ENSSSCG00000039609	ANKRD33B	0.181573
ENSSSCG00000013295	TRIM44	0.182011
ENSSSCG00000004379	SOBP	0.182038
ENSSSCG00000027608	FAM172A	0.182231
ENSSSCG00000011261	WDR48	0.182255
ENSSSCG00000032398	VGLL3	0.183179
ENSSSCG00000012695	INTS6L	0.183209
ENSSSCG00000038927	ZNF649	0.183224
ENSSSCG00000034645	C3orf38	0.183644
ENSSSCG00000015792	LRP2BP	0.183825
ENSSSCG00000014967	FAM76B	0.183903
ENSSSCG00000037465	SERP1	0.184002
ENSSSCG00000028786		0.184497
ENSSSCG00000000588	PLEKHA5	0.184807
ENSSSCG00000034261	TMEM59	0.185284
ENSSSCG00000039314	MCL1	0.186256
ENSSSCG00000030610	FNBP4	0.186731
ENSSSCG00000029998	KLF7	0.186872
ENSSSCG00000017790	TAOK1	0.187024
ENSSSCG00000022953	PTER	0.187242
ENSSSCG00000006100	VIRMA	0.188151
ENSSSCG00000014173	LNPEP	0.188351
ENSSSCG00000016563	TMEM209	0.188865
ENSSSCG00000006850	FAM102B	0.189643
ENSSSCG00000012165		0.189932
ENSSSCG00000012134	PIGA	0.19015
ENSSSCG00000016501	KDM7A	0.190183
ENSSSCG00000015235	ETS1	0.190325
ENSSSCG00000004089	RMND1	0.190362
ENSSSCG00000000939	ACSS3	0.190426
ENSSSCG00000008498	HEATR5B	0.190701
ENSSSCG00000033037	SLC25A37	0.191828
ENSSSCG00000037583	GNB4	0.192417
ENSSSCG00000033411	ZBED5	0.193463
ENSSSCG00000008363	AFTPH	0.193757
ENSSSCG00000030119	PRPF3	0.19581
ENSSSCG00000014269	FNIP1	0.195957
ENSSSCG00000010874	ADSS	0.196077
ENSSSCG00000011704	WWTR1	0.196281
ENSSSCG00000029203	TOX4	0.196415
ENSSSCG00000013335	LGR4	0.196627
ENSSSCG00000024479	ELAC1	0.197767
ENSSSCG00000008096	ZC3H6	0.198904
ENSSSCG00000011775	KLHL24	0.199732
ENSSSCG00000012150	REPS2	0.201189
ENSSSCG00000017046	EBF1	0.201278
ENSSSCG00000015311	CYP51A1	0.201441
ENSSSCG00000011746	SKIL	0.201533
ENSSSCG00000004718	TTBK2	0.201614
ENSSSCG00000016618	CPED1	0.203361
ENSSSCG00000040904	CLDN1	0.203418
ENSSSCG00000010540	ENTPD7	0.204466
ENSSSCG00000035212	KLF6	0.204952
ENSSSCG00000025152	CEP89	0.205726
ENSSSCG00000028135	PRTFDC1	0.205727
ENSSSCG00000006000	TAF2	0.205881
ENSSSCG00000030467	PHC3	0.206784
ENSSSCG00000015531		0.20708
ENSSSCG00000029860	EPB41L4A	0.208439
ENSSSCG00000012403	OGT	0.208855
ENSSSCG00000022081	PHLDB2	0.208877
ENSSSCG00000008799	LIMCH1	0.210867
ENSSSCG00000012606	ATP1B4	0.210903
ENSSSCG00000033156	CMTR2	0.210956
ENSSSCG00000016047	MSTN	0.210958
ENSSSCG00000014267		0.211147
ENSSSCG00000009157	TET2	0.211233
ENSSSCG00000005150	KLHL9	0.212099
ENSSSCG00000004123		0.212272
ENSSSCG00000039695		0.212398
ENSSSCG00000028840	EZH2	0.212529
ENSSSCG00000029606	AOX1	0.212714
ENSSSCG00000021161	CKS2	0.212788
ENSSSCG00000028996	ALDH1A1	0.213313
ENSSSCG00000038549	ZFP36L2	0.213364
ENSSSCG00000035012	DEPDC1B	0.214113
ENSSSCG00000023716	TNFAIP6	0.214253
ENSSSCG00000027767	SHLD2	0.214528
ENSSSCG00000006987	SLC7A2	0.214762
ENSSSCG00000009389	TRIM13	0.215079
ENSSSCG00000022521	DPY19L3	0.215223
ENSSSCG00000004485	CD109	0.215259
ENSSSCG00000036423	CCDC50	0.215288
ENSSSCG00000006508	ASH1L	0.216226
ENSSSCG00000001549	FKBP5	0.216835
ENSSSCG00000015378	SP4	0.216839
ENSSSCG00000027115		0.21689
ENSSSCG00000012035	SYNJ1	0.218348
ENSSSCG00000022101	BRCA1	0.218474
ENSSSCG00000004464	TENT5A	0.218533
ENSSSCG00000028101	SLC9B2	0.219458
ENSSSCG00000016991	DUSP1	0.219657
ENSSSCG00000011943	BBX	0.220013
ENSSSCG00000009399	CYSLTR2	0.220023
ENSSSCG00000017604	HLF	0.220303
ENSSSCG00000040286	CYLD	0.22059
ENSSSCG00000009864	MED13L	0.22124
ENSSSCG00000028035		0.221734
ENSSSCG00000022961	CLMP	0.221797
ENSSSCG00000013100		0.222963
ENSSSCG00000011028	EPC1	0.223829
ENSSSCG00000015567	NIBAN1	0.225002
ENSSSCG00000014232	LOX	0.225149
ENSSSCG00000032416	RGS1	0.226252
ENSSSCG00000009152	SGMS2	0.226571
ENSSSCG00000029805	RHOBTB3	0.227321
ENSSSCG00000027403	AASDH	0.227971
ENSSSCG00000030147	TRMT61B	0.228744
ENSSSCG00000012604	LAMP2	0.229086
ENSSSCG00000025777	ESR1	0.22945
ENSSSCG00000010957	AGTPBP1	0.229658
ENSSSCG00000007965	ZNF200	0.229999
ENSSSCG00000004726	LRRC57	0.231007
ENSSSCG00000037766	NR3C2	0.231412
ENSSSCG00000014168	ELL2	0.231644
ENSSSCG00000016843	CPLANE1	0.232134
ENSSSCG00000037424	CDK19	0.232703
ENSSSCG00000006206	SGK3	0.234528
ENSSSCG00000011752	FNDC3B	0.234853
ENSSSCG00000012314	SERAC1	0.2359
ENSSSCG00000015129	ARHGEF12	0.236409
ENSSSCG00000000579	GOLT1B	0.236608
ENSSSCG00000035258	RABL3	0.236809
ENSSSCG00000027646	TIPARP	0.237681
ENSSSCG00000021354	CNOT4	0.238232
ENSSSCG00000010448		0.23855
ENSSSCG00000016929	PDE4D	0.23968
ENSSSCG00000033787		0.240622
ENSSSCG00000039109	MTERF2	0.241253
ENSSSCG00000002414	SEL1L	0.241791
ENSSSCG00000014116	MTX3	0.242783
ENSSSCG00000016606	ASB15	0.242823
ENSSSCG00000013238	SLC39A13	0.243323
ENSSSCG00000000877	SCYL2	0.243668
ENSSSCG00000015052	USP28	0.243677
ENSSSCG00000008353	WDR92	0.24387
ENSSSCG00000011941	IFT57	0.245358
ENSSSCG00000035842	SUMO1	0.247327
ENSSSCG00000015136	UBASH3B	0.247527
ENSSSCG00000033144	YTHDF3	0.247546
ENSSSCG00000007360	CHD6	0.247963
ENSSSCG00000024439	PTGER4	0.248184
ENSSSCG00000038646	ENAH	0.248303
ENSSSCG00000033919	DCLK1	0.24853
ENSSSCG00000009704	HMGB2	0.248723
ENSSSCG00000016920	MIER3	0.248819
ENSSSCG00000001164	ZNF184	0.248891
ENSSSCG00000012581	NXT2	0.249388
ENSSSCG00000031147	ACAP2	0.25072
ENSSSCG00000000784	LRRK2	0.251052
ENSSSCG00000025711	MEIOB	0.251178
ENSSSCG00000015883	MARCH7	0.252293
ENSSSCG00000023122	KHDRBS1	0.253029
ENSSSCG00000028883	SETD4	0.253313
ENSSSCG00000015556	LAMC2	0.254253
ENSSSCG00000000869	UTP20	0.254309
ENSSSCG00000015284	MDM4	0.254343
ENSSSCG00000015857	UGGT1	0.254763
ENSSSCG00000024761	SNX13	0.255676
ENSSSCG00000023924	PDE1A	0.25683
ENSSSCG00000039616	ZBTB25	0.257305
ENSSSCG00000015820	NSD3	0.258447
ENSSSCG00000000534	IPO8	0.260574
ENSSSCG00000009633		0.261485
ENSSSCG00000027762		0.261558
ENSSSCG00000008136	RANBP2	0.26222
ENSSSCG00000004979	MYO9A	0.262382
ENSSSCG00000000510	TMEM19	0.262534
ENSSSCG00000012727	FMR1	0.262723
ENSSSCG00000008845		0.26369
[truncated: 282 more rows]

## Sheet: T0T1_WGCNA_Pink_module
Table S13: Gene co-expression Pink module and meat quality and gluteus medius (GM) fatty acids composition traits significantly associated according to WGCNA algorithm in the AL-T0/AL-T1 contrast.
Linoleic acid content (C18:2_ω6)				Arachidonic acid content (C20:4)				Intramuscular fatty acids content (GMIMF)				Meat lightness (L)				Polyunsaturated fatty acids content (PUFA)				Polyunsaturated/Saturated fatty acids ratio (PUFA/SFA)				Omega-6 content (ω6)
ID	Gene	P-value		ID	Gene	P-value		ID	Gene	P-value		ID	Gene	P-value		ID	Gene	P-value		ID	Gene	P-value		ID	Gene	P-value
ENSSSCG00000011972	FILIP1L	1.78375e-05		ENSSSCG00000025355	ZNF146	0.000472012		ENSSSCG00000006202	CSPP1	0.000639642		ENSSSCG00000008398	PPP4R3B	0.000202401		ENSSSCG00000011972	FILIP1L	0.000143914		ENSSSCG00000011972	FILIP1L	0.00030249		ENSSSCG00000011972	FILIP1L	5.10167e-05
ENSSSCG00000025355	ZNF146	2.3444e-05		ENSSSCG00000011972	FILIP1L	0.00146032		ENSSSCG00000025355	ZNF146	0.00196167		ENSSSCG00000010606	SLK	0.000314118		ENSSSCG00000008629	ROCK2	0.000474315		ENSSSCG00000004163	BCLAF1	0.000434718		ENSSSCG00000005073	ARID4A	0.000225562
ENSSSCG00000004163	BCLAF1	6.50057e-05		ENSSSCG00000016640	PPP1R3A	0.00268208		ENSSSCG00000004163	BCLAF1	0.00229965		ENSSSCG00000000806	SCAF11	0.000839773		ENSSSCG00000025355	ZNF146	0.000556882		ENSSSCG00000027594	USP16	0.000573454		ENSSSCG00000004163	BCLAF1	0.000228487
ENSSSCG00000006202	CSPP1	6.99601e-05		ENSSSCG00000010606	SLK	0.00402589		ENSSSCG00000016045	PMS1	0.00415718		ENSSSCG00000006994	PCM1	0.000878166		ENSSSCG00000004973	UACA	0.000565721		ENSSSCG00000020702	SENP6	0.000810716		ENSSSCG00000008629	ROCK2	0.000247926
ENSSSCG00000008629	ROCK2	7.57591e-05		ENSSSCG00000004973	UACA	0.00412016		ENSSSCG00000020702	SENP6	0.00491611		ENSSSCG00000004163	BCLAF1	0.00103599		ENSSSCG00000004163	BCLAF1	0.000657772		ENSSSCG00000025355	ZNF146	0.000904051		ENSSSCG00000027594	USP16	0.000396672
ENSSSCG00000020702	SENP6	8.31406e-05		ENSSSCG00000027594	USP16	0.00484437		ENSSSCG00000011972	FILIP1L	0.00504786		ENSSSCG00000020702	SENP6	0.00111127		ENSSSCG00000005073	ARID4A	0.000689354		ENSSSCG00000016640	PPP1R3A	0.000940055		ENSSSCG00000004973	UACA	0.000420817
ENSSSCG00000005073	ARID4A	0.000146933		ENSSSCG00000003768	NEXN	0.00493741		ENSSSCG00000027594	USP16	0.00570075		ENSSSCG00000008493	CEBPZ	0.0011599		ENSSSCG00000027594	USP16	0.000832131		ENSSSCG00000010606	SLK	0.00103481		ENSSSCG00000025355	ZNF146	0.000443329
ENSSSCG00000004973	UACA	0.000224492		ENSSSCG00000020702	SENP6	0.00515743		ENSSSCG00000016640	PPP1R3A	0.00604576		ENSSSCG00000023243	NFIA	0.00119188		ENSSSCG00000006202	CSPP1	0.00109149		ENSSSCG00000005073	ARID4A	0.00122783		ENSSSCG00000006202	CSPP1	0.000487049
ENSSSCG00000016640	PPP1R3A	0.000247918		ENSSSCG00000017795	NSRP1	0.005398		ENSSSCG00000008398	PPP4R3B	0.00626951		ENSSSCG00000006202	CSPP1	0.00138919		ENSSSCG00000016640	PPP1R3A	0.00127978		ENSSSCG00000027372	SAMD9	0.00131478		ENSSSCG00000020702	SENP6	0.000613869
ENSSSCG00000006994	PCM1	0.000257323		ENSSSCG00000028201	CWF19L2	0.00596577		ENSSSCG00000006994	PCM1	0.00646129		ENSSSCG00000027594	USP16	0.00147577		ENSSSCG00000020702	SENP6	0.00129038		ENSSSCG00000029608	SEC62	0.0013236		ENSSSCG00000016640	PPP1R3A	0.000631127
ENSSSCG00000003768	NEXN	0.000260703		ENSSSCG00000029608	SEC62	0.00675445		ENSSSCG00000008629	ROCK2	0.00782557		ENSSSCG00000010196	ZNF25	0.00169974		ENSSSCG00000028201	CWF19L2	0.00138797		ENSSSCG00000008629	ROCK2	0.00142597		ENSSSCG00000014882	RSF1	0.000662725
ENSSSCG00000027594	USP16	0.000262468		ENSSSCG00000027516	CIR1	0.00808535		ENSSSCG00000034066	ZCRB1	0.00963991		ENSSSCG00000014882	RSF1	0.00178099		ENSSSCG00000027516	CIR1	0.0014094		ENSSSCG00000016045	PMS1	0.00159275		ENSSSCG00000028201	CWF19L2	0.000823142
ENSSSCG00000004847	MPHOSPH10	0.000273625		ENSSSCG00000016008	CWC22	0.00881871		ENSSSCG00000010606	SLK	0.0100877		ENSSSCG00000005073	ARID4A	0.00180559		ENSSSCG00000014882	RSF1	0.00160866		ENSSSCG00000004973	UACA	0.00161562		ENSSSCG00000006994	PCM1	0.00088983
ENSSSCG00000008493	CEBPZ	0.000310223		ENSSSCG00000004163	BCLAF1	0.00951195		ENSSSCG00000014882	RSF1	0.0123008		ENSSSCG00000030197	CD2AP	0.00197836		ENSSSCG00000010606	SLK	0.0016351		ENSSSCG00000034066	ZCRB1	0.00188847		ENSSSCG00000010606	SLK	0.000964405
ENSSSCG00000008398	PPP4R3B	0.000311196		ENSSSCG00000010243	CCAR1	0.00951964		ENSSSCG00000016008	CWC22	0.0127801		ENSSSCG00000011972	FILIP1L	0.00214308		ENSSSCG00000003768	NEXN	0.00169973		ENSSSCG00000006994	PCM1	0.00225647		ENSSSCG00000015423	DNAJC2	0.00116773
ENSSSCG00000028201	CWF19L2	0.0004671		ENSSSCG00000014882	RSF1	0.00958463		ENSSSCG00000005073	ARID4A	0.0135233		ENSSSCG00000010243	CCAR1	0.00240567		ENSSSCG00000005060	KTN1	0.00172653		ENSSSCG00000028201	CWF19L2	0.00230496		ENSSSCG00000027372	SAMD9	0.00123781
ENSSSCG00000010243	CCAR1	0.000467712		ENSSSCG00000008629	ROCK2	0.00961134		ENSSSCG00000000806	SCAF11	0.0146486		ENSSSCG00000016045	PMS1	0.00247974		ENSSSCG00000027372	SAMD9	0.00188346		ENSSSCG00000017795	NSRP1	0.00234372		ENSSSCG00000008493	CEBPZ	0.00126973
ENSSSCG00000000806	SCAF11	0.000498581		ENSSSCG00000034066	ZCRB1	0.00978747		ENSSSCG00000004847	MPHOSPH10	0.0149901		ENSSSCG00000015423	DNAJC2	0.00264405		ENSSSCG00000029608	SEC62	0.00197484		ENSSSCG00000000806	SCAF11	0.00241219		ENSSSCG00000027516	CIR1	0.0014054
ENSSSCG00000015423	DNAJC2	0.000514113		ENSSSCG00000005060	KTN1	0.0099717		ENSSSCG00000015423	DNAJC2	0.0155824		ENSSSCG00000016008	CWC22	0.00278751		ENSSSCG00000010243	CCAR1	0.00214819		ENSSSCG00000010243	CCAR1	0.0025778		ENSSSCG00000010243	CCAR1	0.0014307
ENSSSCG00000010606	SLK	0.000551036		ENSSSCG00000006994	PCM1	0.0102498		ENSSSCG00000010196	ZNF25	0.0175242		ENSSSCG00000010625	SMC3	0.00292675		ENSSSCG00000015867	PRPF40A	0.00239219		ENSSSCG00000014882	RSF1	0.00267487		ENSSSCG00000005060	KTN1	0.00146361
ENSSSCG00000017795	NSRP1	0.000619524		ENSSSCG00000009119	LARP7	0.0113186		ENSSSCG00000008493	CEBPZ	0.0184191		ENSSSCG00000004973	UACA	0.00314837		ENSSSCG00000000806	SCAF11	0.00245271		ENSSSCG00000015423	DNAJC2	0.00277129		ENSSSCG00000000806	SCAF11	0.00147385
ENSSSCG00000005060	KTN1	0.000636948		ENSSSCG00000008493	CEBPZ	0.0122559		ENSSSCG00000028201	CWF19L2	0.0200366		ENSSSCG00000016640	PPP1R3A	0.00317056		ENSSSCG00000006994	PCM1	0.00259568		ENSSSCG00000006202	CSPP1	0.00291554		ENSSSCG00000008398	PPP4R3B	0.00147975
ENSSSCG00000016045	PMS1	0.000738521		ENSSSCG00000027372	SAMD9	0.0144364		ENSSSCG00000029608	SEC62	0.0205339		ENSSSCG00000015867	PRPF40A	0.00359397		ENSSSCG00000015917	XIRP2	0.00260596		ENSSSCG00000008493	CEBPZ	0.00309893		ENSSSCG00000029608	SEC62	0.00150901
ENSSSCG00000027516	CIR1	0.000803292		ENSSSCG00000005073	ARID4A	0.0144423		ENSSSCG00000030197	CD2AP	0.0212883		ENSSSCG00000029608	SEC62	0.00376259		ENSSSCG00000008493	CEBPZ	0.00270415		ENSSSCG00000015867	PRPF40A	0.00333046		ENSSSCG00000016045	PMS1	0.0015321
ENSSSCG00000014882	RSF1	0.000949901		ENSSSCG00000015917	XIRP2	0.0152194		ENSSSCG00000009119	LARP7	0.0243903		ENSSSCG00000025355	ZNF146	0.00382627		ENSSSCG00000017795	NSRP1	0.00285402		ENSSSCG00000015917	XIRP2	0.00358753		ENSSSCG00000003768	NEXN	0.00163177
ENSSSCG00000029608	SEC62	0.000954897		ENSSSCG00000004847	MPHOSPH10	0.0152244		ENSSSCG00000004973	UACA	0.0245185		ENSSSCG00000004847	MPHOSPH10	0.0047804		ENSSSCG00000004847	MPHOSPH10	0.00303586		ENSSSCG00000008398	PPP4R3B	0.00366547		ENSSSCG00000017795	NSRP1	0.00177519
ENSSSCG00000015867	PRPF40A	0.000957427		ENSSSCG00000000806	SCAF11	0.0153582		ENSSSCG00000003768	NEXN	0.024905		ENSSSCG00000034066	ZCRB1	0.00546564		ENSSSCG00000015423	DNAJC2	0.00327462		ENSSSCG00000005060	KTN1	0.00367748		ENSSSCG00000004847	MPHOSPH10	0.00177638
ENSSSCG00000009119	LARP7	0.00118039		ENSSSCG00000010196	ZNF25	0.0159893		ENSSSCG00000017795	NSRP1	0.0272041		ENSSSCG00000009071	JADE1	0.00591955		ENSSSCG00000016045	PMS1	0.00334759		ENSSSCG00000027516	CIR1	0.00368508		ENSSSCG00000015867	PRPF40A	0.00181796
ENSSSCG00000016008	CWC22	0.00122686		ENSSSCG00000016045	PMS1	0.0168528		ENSSSCG00000010625	SMC3	0.0309671		ENSSSCG00000015917	XIRP2	0.00835311		ENSSSCG00000034066	ZCRB1	0.00374737		ENSSSCG00000004847	MPHOSPH10	0.0040004		ENSSSCG00000015917	XIRP2	0.00210818
ENSSSCG00000034066	ZCRB1	0.00129206		ENSSSCG00000006202	CSPP1	0.0174204		ENSSSCG00000015867	PRPF40A	0.0334849		ENSSSCG00000008614	SMC6	0.00882716		ENSSSCG00000008180	EIF5B	0.00380933		ENSSSCG00000003768	NEXN	0.00424387		ENSSSCG00000016008	CWC22	0.0026516
ENSSSCG00000015917	XIRP2	0.00135296		ENSSSCG00000003700	ESCO1	0.0178183		ENSSSCG00000010243	CCAR1	0.0348874		ENSSSCG00000009119	LARP7	0.0100593		ENSSSCG00000016008	CWC22	0.00432513		ENSSSCG00000030197	CD2AP	0.00526079		ENSSSCG00000034066	ZCRB1	0.00305401
ENSSSCG00000010196	ZNF25	0.00194977		ENSSSCG00000015867	PRPF40A	0.0182453		ENSSSCG00000005060	KTN1	0.042526		ENSSSCG00000017795	NSRP1	0.0109713		ENSSSCG00000008398	PPP4R3B	0.00474533		ENSSSCG00000016008	CWC22	0.00562867		ENSSSCG00000008180	EIF5B	0.00391021
ENSSSCG00000011243	GOLGA4	0.00201755		ENSSSCG00000008398	PPP4R3B	0.0199494		ENSSSCG00000027516	CIR1	0.0484449		ENSSSCG00000030616	RESF1	0.0129856		ENSSSCG00000009119	LARP7	0.00699569		ENSSSCG00000009119	LARP7	0.00641323		ENSSSCG00000030197	CD2AP	0.00394962
ENSSSCG00000008180	EIF5B	0.00205334		ENSSSCG00000008180	EIF5B	0.022166		ENSSSCG00000015917	XIRP2	0.0546184		ENSSSCG00000027516	CIR1	0.0132522		ENSSSCG00000010625	SMC3	0.00804602		ENSSSCG00000008180	EIF5B	0.00721095		ENSSSCG00000010196	ZNF25	0.00400831
ENSSSCG00000010625	SMC3	0.00218925		ENSSSCG00000030616	RESF1	0.0225997		ENSSSCG00000008180	EIF5B	0.0554764		ENSSSCG00000005060	KTN1	0.01343		ENSSSCG00000030616	RESF1	0.00807812		ENSSSCG00000010625	SMC3	0.00733775		ENSSSCG00000010625	SMC3	0.00457587
ENSSSCG00000027372	SAMD9	0.00259442		ENSSSCG00000011243	GOLGA4	0.026081		ENSSSCG00000003700	ESCO1	0.0583043		ENSSSCG00000028201	CWF19L2	0.0145604		ENSSSCG00000030197	CD2AP	0.00815743		ENSSSCG00000030616	RESF1	0.00870984		ENSSSCG00000009119	LARP7	0.00475055
ENSSSCG00000030197	CD2AP	0.00266661		ENSSSCG00000027613	TRDN	0.0273156		ENSSSCG00000009071	JADE1	0.0588513		ENSSSCG00000008629	ROCK2	0.0320787		ENSSSCG00000010196	ZNF25	0.00860137		ENSSSCG00000010196	ZNF25	0.00924414		ENSSSCG00000030616	RESF1	0.00609844
ENSSSCG00000008614	SMC6	0.00609467		ENSSSCG00000010625	SMC3	0.0285318		ENSSSCG00000027372	SAMD9	0.0753861		ENSSSCG00000003768	NEXN	0.0346319		ENSSSCG00000011243	GOLGA4	0.0104597		ENSSSCG00000011243	GOLGA4	0.0110463		ENSSSCG00000011243	GOLGA4	0.006471
ENSSSCG00000012556	RBM41	0.00652238		ENSSSCG00000015423	DNAJC2	0.028561		ENSSSCG00000030616	RESF1	0.0754077		ENSSSCG00000008180	EIF5B	0.0456236		ENSSSCG00000023243	NFIA	0.0142975		ENSSSCG00000008614	SMC6	0.020485		ENSSSCG00000023243	NFIA	0.00782428
ENSSSCG00000030616	RESF1	0.00658575		ENSSSCG00000009071	JADE1	0.0373382		ENSSSCG00000011243	GOLGA4	0.0803454		ENSSSCG00000027372	SAMD9	0.0594835		ENSSSCG00000027613	TRDN	0.015085		ENSSSCG00000023243	NFIA	0.027953		ENSSSCG00000008614	SMC6	0.0111943
ENSSSCG00000027613	TRDN	0.012614		ENSSSCG00000030197	CD2AP	0.043864		ENSSSCG00000012556	RBM41	0.0881067		ENSSSCG00000011243	GOLGA4	0.0748375		ENSSSCG00000012556	RBM41	0.0221542		ENSSSCG00000012556	RBM41	0.0291111		ENSSSCG00000012556	RBM41	0.0133517
ENSSSCG00000023243	NFIA	0.0170972		ENSSSCG00000012556	RBM41	0.0600351		ENSSSCG00000008614	SMC6	0.102475		ENSSSCG00000008138	GCC2	0.125832		ENSSSCG00000008614	SMC6	0.0223671		ENSSSCG00000009071	JADE1	0.0292584		ENSSSCG00000027613	TRDN	0.0134752
ENSSSCG00000008138	GCC2	0.0210911		ENSSSCG00000008614	SMC6	0.0986214		ENSSSCG00000023243	NFIA	0.102918		ENSSSCG00000012556	RBM41	0.131251		ENSSSCG00000003700	ESCO1	0.0532226		ENSSSCG00000003700	ESCO1	0.0307538		ENSSSCG00000008138	GCC2	0.0389323
ENSSSCG00000003700	ESCO1	0.0218791		ENSSSCG00000008138	GCC2	0.102379		ENSSSCG00000008138	GCC2	0.150692		ENSSSCG00000027613	TRDN	0.22756		ENSSSCG00000008138	GCC2	0.0578431		ENSSSCG00000008138	GCC2	0.0364244		ENSSSCG00000003700	ESCO1	0.0562972
ENSSSCG00000009071	JADE1	0.0929695		ENSSSCG00000023243	NFIA	0.135278		ENSSSCG00000027613	TRDN	0.250498		ENSSSCG00000003700	ESCO1	0.232778		ENSSSCG00000009071	JADE1	0.095426		ENSSSCG00000027613	TRDN	0.0368155		ENSSSCG00000009071	JADE1	0.0712174

## Sheet: T0T1_WGCNA_Turquoise_module
Table S13: Gene co-expression Turquoise module and meat quality and gluteus medius (GM) fatty acids composition traits significantly associated according to WGCNA algorithm in the AL-T0/AL-T1 contrast.
Omega-6/Omega-3 ratio (ω6/ω3)
ID	Gene	P-value
ENSSSCG00000037645		9.97934e-06
ENSSSCG00000013260	MDK	1.02733e-05
ENSSSCG00000007170	CPXM1	1.61989e-05
ENSSSCG00000001765	ADAMTS7	2.02284e-05
ENSSSCG00000011398	SEMA3F	8.04252e-05
ENSSSCG00000017168	SEPTIN9	9.43842e-05
ENSSSCG00000036702	ACTN1	0.00012283
ENSSSCG00000010253	HK1	0.00012601
ENSSSCG00000029230	ECM1	0.000130513
ENSSSCG00000030325	C1QTNF6	0.000132591
ENSSSCG00000011358	TREX1	0.000137496
ENSSSCG00000025593		0.00014581
ENSSSCG00000011624	MCM2	0.000147501
ENSSSCG00000007435	PLTP	0.000149312
ENSSSCG00000004705	MAP1A	0.000153262
ENSSSCG00000012277	TIMP1	0.000167452
ENSSSCG00000001456		0.000167719
ENSSSCG00000006955	GSDMD	0.000181648
ENSSSCG00000028609	SLC12A4	0.000193915
ENSSSCG00000013114	SLC15A3	0.000206025
ENSSSCG00000015232	ST3GAL4	0.00023029
ENSSSCG00000017012	SLIT3	0.000253171
ENSSSCG00000027434	OLFM2	0.00025321
ENSSSCG00000013263	CREB3L1	0.000259548
ENSSSCG00000005924	MROH1	0.000282224
ENSSSCG00000023522	TGM2	0.000290673
ENSSSCG00000002039	MMP14	0.000297105
ENSSSCG00000000293	ITGA5	0.000308976
ENSSSCG00000006533	ADAM15	0.000325393
ENSSSCG00000016721	DBNL	0.00033516
ENSSSCG00000010600	CALHM2	0.000349828
ENSSSCG00000012318	MAGED1	0.000351363
ENSSSCG00000017526	COPZ2	0.000355847
ENSSSCG00000017422	FKBP10	0.0003838
ENSSSCG00000030303	ACHE	0.000399765
ENSSSCG00000040586		0.000407249
ENSSSCG00000039986	RGS8	0.000410214
ENSSSCG00000038992	TUBB6	0.000420887
ENSSSCG00000011399	GNAI2	0.000429621
ENSSSCG00000012766	BGN	0.000431349
ENSSSCG00000009516	UBAC2	0.000459753
ENSSSCG00000025109	PLD3	0.000482402
ENSSSCG00000032428	ARSA	0.000483331
ENSSSCG00000008122	ADRA2B	0.000502773
ENSSSCG00000003554	SELENON	0.000511781
ENSSSCG00000030421	GDI1	0.000512574
ENSSSCG00000017943	ACAP1	0.000519344
ENSSSCG00000014884		0.000525471
ENSSSCG00000024059	VAT1	0.000531955
ENSSSCG00000026084	SLC49A3	0.000540271
ENSSSCG00000003402	PGD	0.00054332
ENSSSCG00000036237	ITGA7	0.000544609
ENSSSCG00000037184	GPR4	0.000550082
ENSSSCG00000012787	L1CAM	0.000572526
ENSSSCG00000001372	GNL1	0.000574471
ENSSSCG00000013720		0.000583484
ENSSSCG00000008991	FRAS1	0.000588221
ENSSSCG00000037032	DNASE1L1	0.00060001
ENSSSCG00000028278	POLR2A	0.000603175
ENSSSCG00000028197	PFKL	0.000608798
ENSSSCG00000008312	DYSF	0.000614973
ENSSSCG00000037000	SIGMAR1	0.000616634
ENSSSCG00000025618	TAP1	0.000640627
ENSSSCG00000000194		0.000645918
ENSSSCG00000034137	PPIB	0.000658742
ENSSSCG00000000190	TUBA1B	0.000677496
ENSSSCG00000002689	CMIP	0.000697438
ENSSSCG00000029331	PALLD	0.000706528
ENSSSCG00000004738	MAPKBP1	0.000713992
ENSSSCG00000014852	ARRB1	0.000718403
ENSSSCG00000000681	P3H3	0.000730994
ENSSSCG00000001818	FES	0.000734045
ENSSSCG00000039983	GJA4	0.000737972
ENSSSCG00000036223	ACKR1	0.000744043
ENSSSCG00000023666	CTSB	0.000760011
ENSSSCG00000013886	B3GNT3	0.000767613
ENSSSCG00000002452	LGMN	0.000770149
ENSSSCG00000005934	TRAPPC9	0.000796973
ENSSSCG00000036152	TSPAN15	0.00081954
ENSSSCG00000037450	SSC5D	0.000856867
ENSSSCG00000010854	TMEM63A	0.000869081
ENSSSCG00000021821	MYO1C	0.000872305
ENSSSCG00000040538	WDFY2	0.0008748
ENSSSCG00000033299	FLNA	0.000876731
ENSSSCG00000012571	COL4A6	0.000884866
ENSSSCG00000004024		0.000915623
ENSSSCG00000022176		0.000927112
ENSSSCG00000001927		0.000927922
ENSSSCG00000016753	POLD2	0.000939022
ENSSSCG00000036178	CCDC167	0.000947275
ENSSSCG00000016450	NOS3	0.000949601
ENSSSCG00000013627	PRKCSH	0.000961515
ENSSSCG00000012836	AP2A2	0.000984933
ENSSSCG00000030015		0.0009871
ENSSSCG00000014869	LRRC32	0.000989548
ENSSSCG00000011641	SLCO2A1	0.00101014
ENSSSCG00000005317	TLN1	0.00103293
ENSSSCG00000010915	NAV1	0.00104775
ENSSSCG00000006273	MCM4	0.00107114
ENSSSCG00000030110		0.00107303
ENSSSCG00000032591		0.00108483
ENSSSCG00000011198	RFTN1	0.00109734
ENSSSCG00000017754		0.0011205
ENSSSCG00000011884	HCLS1	0.00113861
ENSSSCG00000035293		0.0011923
ENSSSCG00000010280	VSIR	0.00119825
ENSSSCG00000012893	UNC93B1	0.00120257
ENSSSCG00000008281	RTKN	0.00122992
ENSSSCG00000024823	RCN3	0.00124019
ENSSSCG00000031236	GLIPR2	0.00125047
ENSSSCG00000002815	ADGRG1	0.00125829
ENSSSCG00000010267	LRRC20	0.00131
ENSSSCG00000002451	RIN3	0.00131039
ENSSSCG00000007167	VPS16	0.00131405
ENSSSCG00000017918	ARRB2	0.00135811
ENSSSCG00000038094	GPX7	0.00138044
ENSSSCG00000007978		0.00138049
ENSSSCG00000013900		0.0013877
ENSSSCG00000013237	SPI1	0.00138814
ENSSSCG00000001455		0.00140885
ENSSSCG00000011251	MYD88	0.0014349
ENSSSCG00000017909	CHRNE	0.00144406
ENSSSCG00000010277	SLC29A3	0.00144741
ENSSSCG00000002919	TYROBP	0.00145889
ENSSSCG00000031615	SERPINB9	0.00147043
ENSSSCG00000012974	CFL1	0.00148188
ENSSSCG00000008239	CAPG	0.00150084
ENSSSCG00000036135	COL1A1	0.00150598
ENSSSCG00000038151	CMTM3	0.00150969
ENSSSCG00000011616	COPG1	0.00151341
ENSSSCG00000005620	SH2D3C	0.00154073
ENSSSCG00000017258	FAM20A	0.00154875
ENSSSCG00000001453	HLA-DRA	0.00155078
ENSSSCG00000022506	COL6A1	0.00155283
ENSSSCG00000016287	CHRND	0.00156
ENSSSCG00000029414		0.00156263
ENSSSCG00000001657	CUL7	0.00156572
ENSSSCG00000007675	EPHB4	0.00157059
ENSSSCG00000000145		0.00160907
ENSSSCG00000029002	PNKD	0.00162838
ENSSSCG00000006777	RHOC	0.00164409
ENSSSCG00000017429	P3H4	0.00164486
ENSSSCG00000013256	ARHGAP1	0.00165318
ENSSSCG00000003558	RPS6KA1	0.00167338
ENSSSCG00000027371	PCDHGA4	0.00168139
ENSSSCG00000000038	CYB5R3	0.00169411
ENSSSCG00000032284	CCND3	0.00170783
ENSSSCG00000015119	MFRP	0.00171112
ENSSSCG00000005751	COL5A1	0.0017248
ENSSSCG00000004547		0.00173885
ENSSSCG00000012832		0.00175539
ENSSSCG00000006474	NES	0.00180428
ENSSSCG00000017082	SPARC	0.00181884
ENSSSCG00000001873	CSPG4	0.00184009
ENSSSCG00000010005		0.00184832
ENSSSCG00000001422	C2	0.00184976
ENSSSCG00000003017	TGFB1	0.0018749
ENSSSCG00000000117	C22orf23	0.00189508
ENSSSCG00000028879	PLOD3	0.00191887
ENSSSCG00000025488	MCM3	0.0019238
ENSSSCG00000029570	PXDN	0.0019497
ENSSSCG00000017951	ATP1B2	0.00195543
ENSSSCG00000015846	RBPMS	0.00196986
ENSSSCG00000017109	ADAMTS16	0.00198036
ENSSSCG00000033608	LOXL2	0.00201946
ENSSSCG00000003137	PLEKHA4	0.00205385
ENSSSCG00000036549	DPYSL3	0.00207378
ENSSSCG00000010281	PSAP	0.00207526
ENSSSCG00000006512	FDPS	0.00207864
ENSSSCG00000031487	LSP1	0.00207998
ENSSSCG00000003577	WASF2	0.00209715
ENSSSCG00000010580	NFKB2	0.00209807
ENSSSCG00000017705	CCL5	0.00213652
ENSSSCG00000005641	DNM1	0.00215035
ENSSSCG00000026951	PSMB8	0.00216771
ENSSSCG00000001660	PTK7	0.00216976
ENSSSCG00000032964	STK11IP	0.00217157
ENSSSCG00000016267	ITM2C	0.00218053
ENSSSCG00000016379		0.00219315
ENSSSCG00000001439	GPSM3	0.00219684
ENSSSCG00000017365	G6PC3	0.00220274
ENSSSCG00000017873	CAMKK1	0.0022197
ENSSSCG00000000736	TEAD4	0.00222195
ENSSSCG00000009916	ACADS	0.00223731
ENSSSCG00000001507	ZBTB22	0.00223877
ENSSSCG00000006395		0.0022642
ENSSSCG00000040524	ISYNA1	0.00228653
ENSSSCG00000027124		0.00231785
ENSSSCG00000000368	MMP19	0.00231891
ENSSSCG00000017728	MYO1D	0.00233595
ENSSSCG00000001703	NFKBIE	0.00233682
ENSSSCG00000005654	SPTAN1	0.00233937
ENSSSCG00000017926	SLC16A13	0.00234472
ENSSSCG00000003253	MYADM	0.00234841
ENSSSCG00000011444	NT5DC2	0.00235952
ENSSSCG00000004679	SORD	0.00238445
ENSSSCG00000006561	SLC39A1	0.00239831
ENSSSCG00000039795		0.00240818
ENSSSCG00000013073	FADS3	0.00243271
ENSSSCG00000031493	CYBA	0.00244155
ENSSSCG00000016590	SND1	0.00245626
ENSSSCG00000040435	STAT6	0.00247111
ENSSSCG00000002829	MMP2	0.00248947
ENSSSCG00000014274	PDLIM4	0.00249133
ENSSSCG00000008557	EMILIN1	0.00249555
ENSSSCG00000030415	DPP3	0.00249903
ENSSSCG00000027946	MVP	0.00250862
ENSSSCG00000020976	CSRP1	0.00251994
ENSSSCG00000026331		0.00253505
ENSSSCG00000017928		0.00254937
ENSSSCG00000009545	COL4A2	0.00257092
ENSSSCG00000016215		0.00260475
ENSSSCG00000017218	CDR2L	0.00261714
ENSSSCG00000014853	GDPD5	0.00261722
ENSSSCG00000025108	G6PD	0.00261999
ENSSSCG00000012294	PLP2	0.00264439
ENSSSCG00000036531		0.00264636
ENSSSCG00000022208	TNFRSF1B	0.00266539
ENSSSCG00000017190	EXOC7	0.00266614
ENSSSCG00000012396	MED12	0.00269814
ENSSSCG00000001229		0.00270012
ENSSSCG00000007739	GUSB	0.00270119
ENSSSCG00000010341	TSPAN14	0.00270451
ENSSSCG00000012074		0.00274043
ENSSSCG00000000263	TNS2	0.00276861
ENSSSCG00000010097	LZTR1	0.00277384
ENSSSCG00000005243	PGM5	0.00277554
ENSSSCG00000003600	TINAGL1	0.00278997
ENSSSCG00000038954	PLIN3	0.00280807
ENSSSCG00000001457	SLA-DQB1	0.00280831
ENSSSCG00000036501	WDR1	0.00283867
ENSSSCG00000003603	COL16A1	0.00289623
ENSSSCG00000008687	MXD4	0.0029104
ENSSSCG00000002142	TEP1	0.00293466
ENSSSCG00000036446	PALD1	0.00298474
ENSSSCG00000033337	ARHGDIB	0.00299761
ENSSSCG00000006578	S100A4	0.00300392
ENSSSCG00000038732	AGAP2	0.00305207
ENSSSCG00000002277	SPTB	0.0031298
ENSSSCG00000005587	NEK6	0.00315437
ENSSSCG00000026863	FARP1	0.00316224
ENSSSCG00000005614	NIBAN2	0.00318238
ENSSSCG00000011033	VIM	0.00319198
ENSSSCG00000007431	CTSA	0.00320524
ENSSSCG00000013655	ICAM1	0.00320797
ENSSSCG00000003514	HSPG2	0.00322906
ENSSSCG00000035805	DLK1	0.00324206
ENSSSCG00000007952	TRAP1	0.00325209
ENSSSCG00000011575	ATG7	0.0032633
ENSSSCG00000017874	ATP2A3	0.00328827
ENSSSCG00000004549	RBPMS2	0.00329441
ENSSSCG00000027466	PCOLCE	0.00335105
ENSSSCG00000000130	CYTH4	0.00336413
ENSSSCG00000035419	RARRES2	0.00339137
ENSSSCG00000017952	SAT2	0.00339531
ENSSSCG00000004957	CLN6	0.0034046
ENSSSCG00000015072	PCSK7	0.00354748
ENSSSCG00000017159	TBC1D16	0.00357138
ENSSSCG00000011377	LAMB2	0.00357641
ENSSSCG00000000142	FOXRED2	0.00363868
ENSSSCG00000013087	TKFC	0.00364213
ENSSSCG00000014628	APBB1	0.00368713
ENSSSCG00000013895	MAST3	0.00369413
ENSSSCG00000003189	PRMT1	0.00369558
ENSSSCG00000005711	NUP214	0.00371792
ENSSSCG00000010131	TXNRD2	0.00372803
ENSSSCG00000011555	RPUSD3	0.00373852
ENSSSCG00000025114	FMNL3	0.00375461
ENSSSCG00000026457	GALNT17	0.00375591
ENSSSCG00000032613	SNAI1	0.00375685
ENSSSCG00000017181		0.00375963
ENSSSCG00000038991		0.00382
ENSSSCG00000022343	ENO1	0.00382814
ENSSSCG00000007797	ITGAL	0.00384119
ENSSSCG00000012365	MSN	0.00385396
ENSSSCG00000000118	MICALL1	0.00385641
ENSSSCG00000001770	CTSH	0.00390119
ENSSSCG00000002386		0.00390661
ENSSSCG00000040546		0.00391319
ENSSSCG00000017428	JUP	0.00392509
ENSSSCG00000003136		0.00393219
ENSSSCG00000001472	SLA-DOA	0.00396353
ENSSSCG00000017717	UNC45B	0.00396946
ENSSSCG00000001469	SLA-DMB	0.00397814
ENSSSCG00000025126	LGI4	0.00400067
ENSSSCG00000003493	CAPZB	0.00401634
ENSSSCG00000031492	PPP1R18	0.00401787
ENSSSCG00000000704	TAPBPL	0.00402505
ENSSSCG00000017152	SGSH	0.00403236
ENSSSCG00000002004	PSME2	0.00404489
ENSSSCG00000006529	SLC50A1	0.00407546
ENSSSCG00000015073	TAGLN	0.00408712
ENSSSCG00000002864	SLC7A10	0.00409994
ENSSSCG00000003582	SMPDL3B	0.00410738
ENSSSCG00000001427	C4A	0.00419986
ENSSSCG00000012890	TCIRG1	0.00423398
ENSSSCG00000003000	ITPKC	0.00423627
ENSSSCG00000008621	NBAS	0.0042404
ENSSSCG00000008019	JPT2	0.00424372
ENSSSCG00000010620	XPNPEP1	0.00424395
ENSSSCG00000022236	FOLR1	0.00429112
ENSSSCG00000040793	CTSD	0.00432167
ENSSSCG00000023080	TPP1	0.00433508
ENSSSCG00000014871	TSKU	0.00434506
ENSSSCG00000016461	ZYX	0.0043515
ENSSSCG00000007647	MAP11	0.00438771
ENSSSCG00000029763	IFI35	0.00439223
ENSSSCG00000027407	MYH14	0.00439592
ENSSSCG00000014430	ABLIM3	0.00444314
ENSSSCG00000000712	VWF	0.00446838
ENSSSCG00000023371	EHD2	0.00449144
ENSSSCG00000020846	SCARA3	0.00449792
ENSSSCG00000037096	TMEM88	0.00454095
ENSSSCG00000001697	TMEM63B	0.00458705
ENSSSCG00000012855	SLC22A18	0.00459562
ENSSSCG00000003569	SLC9A1	0.00461582
ENSSSCG00000007557	MICALL2	0.00463088
ENSSSCG00000002774	RIPOR1	0.00466094
ENSSSCG00000015825	ADGRA2	0.00466208
ENSSSCG00000040248		0.00467214
ENSSSCG00000010017	SMTN	0.0046729
ENSSSCG00000032957	PTPN23	0.00471039
ENSSSCG00000013007	ZFPL1	0.00475014
ENSSSCG00000000234	GRASP	0.00476961
ENSSSCG00000000737	TULP3	0.00477697
ENSSSCG00000015045	NCAM1	0.00478843
ENSSSCG00000013901	IFI30	0.00479084
ENSSSCG00000035653	PGAP2	0.00479191
ENSSSCG00000039071		0.00479692
ENSSSCG00000035733		0.00481369
ENSSSCG00000010519	ZDHHC16	0.00487766
ENSSSCG00000000685	TPI1	0.00490361
ENSSSCG00000032330	THY1	0.004929
ENSSSCG00000025955	SSBP4	0.00496035
ENSSSCG00000003115	MEIS3	0.00496291
ENSSSCG00000013723		0.00497479
ENSSSCG00000016656		0.00502116
ENSSSCG00000017761	UNC119	0.00502665
ENSSSCG00000014817	ARAP1	0.00505491
ENSSSCG00000036547	METTL7B	0.00506315
ENSSSCG00000038055	CORO1A	0.00507156
ENSSSCG00000027986	ABCB8	0.00508271
ENSSSCG00000001991	DHRS1	0.005109
ENSSSCG00000040642	LASP1	0.00512669
ENSSSCG00000036383	LGALS3BP	0.00518082
ENSSSCG00000027331	COL6A3	0.00521037
ENSSSCG00000031698	TSTA3	0.00522167
ENSSSCG00000017355	GRN	0.00524636
ENSSSCG00000012956	PACS1	0.00525081
ENSSSCG00000036317	VASP	0.00526563
ENSSSCG00000003613	HDAC1	0.0052876
ENSSSCG00000017089	ANXA6	0.00530712
ENSSSCG00000035952	TGFB1I1	0.00532419
ENSSSCG00000039307	H2AFJ	0.00532453
ENSSSCG00000022891	MYMK	0.00534689
ENSSSCG00000012971	EFEMP2	0.00538409
ENSSSCG00000034937	SH3BGRL3	0.00538839
ENSSSCG00000020677		0.00539095
ENSSSCG00000003488	UBR4	0.00539385
ENSSSCG00000017879	SPNS2	0.00541266
ENSSSCG00000007228	HM13	0.00542728
ENSSSCG00000012969	FIBP	0.00542911
ENSSSCG00000008697	HTT	0.00544309
ENSSSCG00000037025	PLVAP	0.00544356
ENSSSCG00000030229	ABHD14A	0.00546831
ENSSSCG00000007140	SMOX	0.00548816
ENSSSCG00000002684	CDH13	0.00551993
ENSSSCG00000007625	ARPC1B	0.00554882
ENSSSCG00000023377	EMP3	0.00556253
ENSSSCG00000007770	ORAI3	0.00558676
ENSSSCG00000038296	SH3RF3	0.00560986
ENSSSCG00000013876	MYO9B	0.00561373
ENSSSCG00000037539	SORCS2	0.00565041
ENSSSCG00000013638	ILF3	0.00566986
ENSSSCG00000015083		0.00569259
ENSSSCG00000023215	MAOB	0.00573155
ENSSSCG00000008265	DOK1	0.00574926
ENSSSCG00000017737	RNF135	0.00574948
ENSSSCG00000030149	CAPNS1	0.00579752
ENSSSCG00000035772	CDH5	0.00584803
ENSSSCG00000012837	CHID1	0.00587515
ENSSSCG00000004578	ANXA2	0.00589558
ENSSSCG00000013664	SHFL	0.00589845
ENSSSCG00000000765	IL17RA	0.0059045
ENSSSCG00000001912	PML	0.00591844
ENSSSCG00000003178	IRF3	0.00592567
ENSSSCG00000002972		0.00595302
ENSSSCG00000017826	SMG6	0.0059828
ENSSSCG00000039160		0.00598351
ENSSSCG00000017366	HDAC5	0.00603815
ENSSSCG00000003329	ACAP3	0.00606572
ENSSSCG00000010966	CCL19	0.00615072
ENSSSCG00000002898	LIN37	0.00615183
ENSSSCG00000003267	MBOAT7	0.00615707
ENSSSCG00000039861	HDHD3	0.00616484
ENSSSCG00000000734	TSPAN11	0.00620896
ENSSSCG00000011582	CAND2	0.00621734
ENSSSCG00000032242	HMGA1	0.00621806
ENSSSCG00000024206	CPPED1	0.00622458
ENSSSCG00000000379	ESYT1	0.00624393
ENSSSCG00000003339	INTS11	0.00625578
ENSSSCG00000005617	STXBP1	0.00629821
ENSSSCG00000003154	GYS1	0.00633689
ENSSSCG00000032796	GRINA	0.00636694
ENSSSCG00000001750	PAQR8	0.00638322
ENSSSCG00000028446	PCBP4	0.00638968
ENSSSCG00000021145	AP1S1	0.00640752
ENSSSCG00000013763	DCAF15	0.00640942
ENSSSCG00000010495	ALDH18A1	0.00644661
ENSSSCG00000016459	EPHA1	0.00648178
ENSSSCG00000013421	PTBP1	0.00657372
ENSSSCG00000017804	ABR	0.00658351
ENSSSCG00000021040	SLC26A11	0.00659034
ENSSSCG00000031125	AMPD2	0.00660611
ENSSSCG00000007359	LPIN3	0.00663592
ENSSSCG00000015231	DCPS	0.00663828
ENSSSCG00000024161		0.00668253
ENSSSCG00000003351	MMP23B	0.00677325
ENSSSCG00000034266	CACNA1H	0.00678852
ENSSSCG00000031767		0.00683799
ENSSSCG00000022864	EIF6	0.00684394
ENSSSCG00000034049		0.0068686
ENSSSCG00000005650	CERCAM	0.00690456
ENSSSCG00000008692	ADD1	0.00690869
ENSSSCG00000021557	SULT1A3	0.00690884
ENSSSCG00000028372	FAM131A	0.00691513
ENSSSCG00000003183	RRAS	0.00692397
ENSSSCG00000010855		0.0069284
ENSSSCG00000025344	PHC2	0.00698738
ENSSSCG00000039926		0.00699595
ENSSSCG00000026962	A4GALT	0.00704219
ENSSSCG00000017156	GAA	0.00705996
ENSSSCG00000014316	TGFBI	0.00707705
ENSSSCG00000003971	SCMH1	0.00710619
ENSSSCG00000014567	TRIM66	0.00712799
ENSSSCG00000026569	CLEC16A	0.00713899
ENSSSCG00000011646	KY	0.00715
ENSSSCG00000005738		0.00715178
ENSSSCG00000011357	SHISA5	0.00718504
ENSSSCG00000004058	EZR	0.00719048
ENSSSCG00000040957		0.007196
ENSSSCG00000001379	TUBB	0.00720623
ENSSSCG00000033190		0.00721075
ENSSSCG00000025545	HDAC6	0.00721134
ENSSSCG00000017245	CDC42EP4	0.00722286
ENSSSCG00000007715	ABHD11	0.00728507
ENSSSCG00000035238	ELOVL1	0.00730441
ENSSSCG00000006488	GLMP	0.00735772
ENSSSCG00000013038		0.00738712
ENSSSCG00000024463	PJA1	0.00741094
ENSSSCG00000011471	FLNB	0.00742284
ENSSSCG00000005325		0.00742698
ENSSSCG00000034058	ARHGDIA	0.00745045
ENSSSCG00000035939	ZNF512B	0.00745688
ENSSSCG00000038717		0.00746351
ENSSSCG00000023912	ORAI2	0.00747009
ENSSSCG00000032452	WFS1	0.00748815
ENSSSCG00000009879	TPCN1	0.00749277
ENSSSCG00000034758	PDXK	0.00750411
ENSSSCG00000012784	SSR4	0.00752341
ENSSSCG00000021067	BLVRB	0.00753195
ENSSSCG00000002000	IPO4	0.00761819
ENSSSCG00000006540	PBXIP1	0.00762483
ENSSSCG00000007980	FAM234A	0.00763453
ENSSSCG00000009782	ARL6IP4	0.00764903
ENSSSCG00000001424	SKIV2L	0.00768837
ENSSSCG00000005524	DAB2IP	0.00768972
ENSSSCG00000003913	MAST2	0.00770589
ENSSSCG00000013304	NAT10	0.00772757
ENSSSCG00000012063	VPS26C	0.00774489
ENSSSCG00000022289	PCDH1	0.00774577
ENSSSCG00000017578	ITGA3	0.00776329
ENSSSCG00000025821	C2CD2	0.00776794
ENSSSCG00000005908		0.0077723
ENSSSCG00000015116	MCAM	0.00778314
ENSSSCG00000014441	CSF1R	0.007801
ENSSSCG00000024189	SIL1	0.00781419
ENSSSCG00000026281	SCAP	0.00783759
ENSSSCG00000038969	DMPK	0.00786274
ENSSSCG00000017788	TP53I13	0.00788452
ENSSSCG00000008721	ABLIM2	0.00792746
ENSSSCG00000003561	ZDHHC18	0.00792979
ENSSSCG00000039144		0.00793213
ENSSSCG00000007565	TTYH3	0.00794508
ENSSSCG00000000087	TAB1	0.00797704
ENSSSCG00000000684	USP5	0.00798652
ENSSSCG00000000297	PDE1B	0.00805198
ENSSSCG00000006735	PTGFRN	0.00805436
ENSSSCG00000032031	QARS	0.00807684
ENSSSCG00000037310	ATP6AP1	0.00809098
ENSSSCG00000008633	PDIA6	0.00814112
ENSSSCG00000009567	RASA3	0.00814411
ENSSSCG00000040706	DBN1	0.00815225
ENSSSCG00000017583	SGCA	0.00820651
ENSSSCG00000033410		0.00823178
ENSSSCG00000040977	SNX8	0.00824461
ENSSSCG00000024389	SIGIRR	0.00834779
ENSSSCG00000030767		0.00834925
ENSSSCG00000017690	DHRS11	0.0083608
ENSSSCG00000040494	RPL3	0.00836106
ENSSSCG00000028465	ELAC2	0.00836392
ENSSSCG00000000708	TNFRSF1A	0.00840208
ENSSSCG00000025565		0.00840635
ENSSSCG00000016186		0.00842536
ENSSSCG00000001852	IDH2	0.00844298
ENSSSCG00000016571		0.00847975
ENSSSCG00000032116		0.00848923
ENSSSCG00000012397		0.00850821
ENSSSCG00000005625	ENG	0.00853878
ENSSSCG00000011385	APEH	0.00856553
ENSSSCG00000009759	SCARB1	0.00857591
ENSSSCG00000030309	NDRG2	0.00858409
ENSSSCG00000022162		0.00860521
ENSSSCG00000010756	MGMT	0.00862228
ENSSSCG00000035983	TPPP3	0.00862409
ENSSSCG00000009998	CASTOR1	0.00862579
ENSSSCG00000003156	HRC	0.00862844
ENSSSCG00000003433	PLOD1	0.00869436
ENSSSCG00000034723	PYCR1	0.00874019
ENSSSCG00000007547	ADAP1	0.00879009
ENSSSCG00000025499		0.00884027
ENSSSCG00000000964	LMF2	0.0088444
ENSSSCG00000007949	SRL	0.00892726
ENSSSCG00000002006	PSME1	0.0089362
ENSSSCG00000018058	ARHGAP23	0.00894478
ENSSSCG00000007682	SH2B2	0.0089449
ENSSSCG00000001821	UNC45A	0.0089661
ENSSSCG00000031074	FAM110D	0.00903501
ENSSSCG00000021597	PHLDA2	0.00905578
ENSSSCG00000001347	PPP1R10	0.00910825
ENSSSCG00000007574	SDK1	0.0091487
ENSSSCG00000039751	NLRC5	0.00916043
ENSSSCG00000004744	TYRO3	0.00920319
ENSSSCG00000032552		0.00921525
ENSSSCG00000037999	PPP1R14B	0.00923661
ENSSSCG00000011551	TADA3	0.00924909
ENSSSCG00000008040	TSC2	0.00925914
ENSSSCG00000023362	RHBDF2	0.00925987
ENSSSCG00000011603	TMEM43	0.00926408
ENSSSCG00000004052	FNDC1	0.00931932
ENSSSCG00000032291		0.00936632
ENSSSCG00000031316		0.00937038
ENSSSCG00000017764	KIAA0100	0.00938438
ENSSSCG00000007521	NELFCD	0.00941209
ENSSSCG00000022098		0.00941624
ENSSSCG00000013614	CNN1	0.00943417
ENSSSCG00000022317	SLC38A10	0.00943597
ENSSSCG00000015815	FGFR1	0.00944701
ENSSSCG00000022820		0.00946248
ENSSSCG00000003420		0.00948564
ENSSSCG00000017277	PECAM1	0.0095011
ENSSSCG00000006581		0.00950161
ENSSSCG00000002516	WARS	0.00952459
ENSSSCG00000032967	CACNB3	0.00963898
ENSSSCG00000023585	SERINC2	0.00966719
ENSSSCG00000032819	QPCTL	0.00968922
ENSSSCG00000001780	FAH	0.00976536
ENSSSCG00000017300	MRC2	0.00976937
ENSSSCG00000032010	RNH1	0.00978153
ENSSSCG00000008274		0.00978718
ENSSSCG00000027252	HCFC1R1	0.00980855
ENSSSCG00000025393		0.00982213
ENSSSCG00000020876	RTL5	0.00986323
ENSSSCG00000002921	CLIP3	0.00986618
ENSSSCG00000036887	CLPB	0.00989401
ENSSSCG00000035993	C1QTNF2	0.00990463
ENSSSCG00000005308	RUSC2	0.00991434
ENSSSCG00000000214	GPD1	0.00991792
ENSSSCG00000012999	CAPN1	0.00992728
ENSSSCG00000036824	AVPI1	0.00997619
ENSSSCG00000026414		0.00998087
ENSSSCG00000010079	PPM1F	0.00999567
ENSSSCG00000016502	PARP12	0.0100182
ENSSSCG00000012916		0.0100301
ENSSSCG00000013639	SLC44A2	0.0100648
ENSSSCG00000003477	NECAP2	0.0100752
ENSSSCG00000012982	SIPA1	0.0101018
ENSSSCG00000017230	TMEM104	0.010146
ENSSSCG00000017296	ACE	0.0101474
ENSSSCG00000013630	DNM2	0.0101692
ENSSSCG00000000423		0.0101724
ENSSSCG00000017912	PLD2	0.0101955
ENSSSCG00000002025	SLC22A17	0.010216
ENSSSCG00000040421	HMG20B	0.0102312
ENSSSCG00000040629	IL34	0.0102614
ENSSSCG00000001834	MFGE8	0.0102662
ENSSSCG00000016208	ZFAND2B	0.0102718
ENSSSCG00000013552	GPR108	0.0102748
ENSSSCG00000023228		0.0103071
ENSSSCG00000001430	ATF6B	0.0103087
ENSSSCG00000003138		0.0103171
ENSSSCG00000017924	PELP1	0.0103498
ENSSSCG00000003578	FGR	0.0103884
ENSSSCG00000023165	SEMA7A	0.0104076
ENSSSCG00000032974	MYADML2	0.0104499
ENSSSCG00000006390	CASQ1	0.0104699
ENSSSCG00000040682	MAPK3	0.0105116
ENSSSCG00000020823	BSCL2	0.0105199
ENSSSCG00000012238		0.0106197
ENSSSCG00000009978	AP1B1	0.0106373
ENSSSCG00000017524	CDK5RAP3	0.0106398
ENSSSCG00000023272	ILK	0.0108348
ENSSSCG00000016409	UBE3C	0.0108618
ENSSSCG00000003592	SDC3	0.0108778
ENSSSCG00000012985	LTBP3	0.0108955
ENSSSCG00000010011	TCN2	0.0109255
ENSSSCG00000002389	VASH1	0.0109483
ENSSSCG00000003489	EMC1	0.01095
ENSSSCG00000004870	CNDP2	0.0109827
ENSSSCG00000014388	HDAC3	0.0109999
ENSSSCG00000010032	PISD	0.0110823
ENSSSCG00000031557	CHCHD6	0.0111488
ENSSSCG00000008044	MLST8	0.0112023
ENSSSCG00000001992	RABGGTA	0.0112045
ENSSSCG00000005349	GRHPR	0.0112052
ENSSSCG00000026367	IFT172	0.0112165
ENSSSCG00000017139	RPTOR	0.0112359
ENSSSCG00000008215	SMYD1	0.011245
ENSSSCG00000008693	NOP14	0.0112554
ENSSSCG00000029145	POMGNT1	0.0112823
ENSSSCG00000003214	KCNC3	0.0112847
ENSSSCG00000002953		0.011286
ENSSSCG00000015113	ABCG4	0.0112959
ENSSSCG00000006357	FCER1G	0.0113047
ENSSSCG00000004687	B2M	0.0113241
ENSSSCG00000013604	MYO1F	0.0113443
ENSSSCG00000014431	AFAP1L1	0.0113787
ENSSSCG00000025270	CHRD	0.0114111
ENSSSCG00000023186	CA4	0.0114208
ENSSSCG00000030510	FBL	0.011425
ENSSSCG00000031757	CARS2	0.0114279
ENSSSCG00000028355	ACTG1	0.0114354
ENSSSCG00000035392	IGFBP2	0.0115053
ENSSSCG00000040449	ABHD12	0.0115271
ENSSSCG00000012324	IQSEC2	0.0115622
ENSSSCG00000011426	POC1A	0.0115655
ENSSSCG00000027745	ABCG1	0.0116038
ENSSSCG00000016174	FN1	0.0116777
ENSSSCG00000008057		0.0116845
ENSSSCG00000002714	WDR59	0.0116885
ENSSSCG00000036973	RAC3	0.0117635
ENSSSCG00000011287	HHATL	0.01179
ENSSSCG00000001651	CNPY3	0.0118059
ENSSSCG00000040608	AKR1B1	0.0118282
ENSSSCG00000036534	MYOM3	0.0118297
ENSSSCG00000006522	GBA	0.0118577
ENSSSCG00000017169	SEC14L1	0.0119146
ENSSSCG00000000955	TBC1D22A	0.0119915
ENSSSCG00000006361	PPOX	0.011999
ENSSSCG00000000396	STAT2	0.0120057
ENSSSCG00000011550	CAMK1	0.0120169
ENSSSCG00000012234	SRPX	0.0120534
ENSSSCG00000030217	COLGALT2	0.0121065
ENSSSCG00000017777	FLOT2	0.0121414
ENSSSCG00000034465	LRP10	0.0121472
ENSSSCG00000009888	ERP29	0.0122115
ENSSSCG00000007542	PRKAR1B	0.0122258
ENSSSCG00000008009	LMF1	0.0122747
ENSSSCG00000034569		0.0123929
ENSSSCG00000032637	EVC	0.0124244
ENSSSCG00000011372		0.0124253
ENSSSCG00000001398		0.0124301
ENSSSCG00000003919		0.0124357
ENSSSCG00000040769		0.012467
ENSSSCG00000013241	NR1H3	0.0125065
ENSSSCG00000023880	RRP8	0.0125321
ENSSSCG00000038089	COL18A1	0.0125512
ENSSSCG00000040710	SURF4	0.0126054
ENSSSCG00000010987	UBAP2	0.0126095
ENSSSCG00000000033	TSPO	0.0126429
ENSSSCG00000032481	DPM2	0.0126857
ENSSSCG00000003199	AP2A1	0.0127334
ENSSSCG00000005668	SH3GLB2	0.0127433
ENSSSCG00000006572	NPR1	0.0128337
ENSSSCG00000013034	PLCB3	0.0128474
ENSSSCG00000007968	RHBDF1	0.0128728
ENSSSCG00000017356	FAM171A2	0.0129856
ENSSSCG00000006496	LMNA	0.0130157
ENSSSCG00000032768		0.0130158
ENSSSCG00000017371	TMEM101	0.0130313
ENSSSCG00000007522	CTSZ	0.0130914
ENSSSCG00000013061	EML3	0.0131702
ENSSSCG00000020657	BCAM	0.0131772
ENSSSCG00000039612		0.0131843
ENSSSCG00000013667	COL5A3	0.0132076
ENSSSCG00000033854	LGALS1	0.0132223
ENSSSCG00000003922	UROD	0.0132376
ENSSSCG00000008056		0.0132627
ENSSSCG00000004205	ARHGAP18	0.0132751
ENSSSCG00000001470	SLA-DMA	0.0132777
ENSSSCG00000001595	DAAM2	0.0132858
ENSSSCG00000033516	DHDDS	0.0132872
ENSSSCG00000031642		0.01333
ENSSSCG00000001655	MEA1	0.0133396
ENSSSCG00000039243	CD81	0.0134361
ENSSSCG00000017769	RAB34	0.0134443
ENSSSCG00000012862	OSBPL5	0.0134462
ENSSSCG00000009555	LAMP1	0.0134479
ENSSSCG00000007988	JMJD8	0.0134542
ENSSSCG00000039909	ICAM2	0.0134822
ENSSSCG00000002895	KMT2B	0.0135034
ENSSSCG00000012779	ABCD1	0.0135133
ENSSSCG00000026465	BABAM2	0.0135162
ENSSSCG00000016751	GCK	0.0135196
ENSSSCG00000027875	CA14	0.0135773
ENSSSCG00000003505	DDOST	0.0135922
ENSSSCG00000017934	CLDN7	0.013613
ENSSSCG00000006469	MRPL24	0.0136706
ENSSSCG00000010034		0.0136828
ENSSSCG00000010929	CYB5R1	0.0136895
ENSSSCG00000001773	TMED3	0.0137096
ENSSSCG00000025830	NUP93	0.0137134
ENSSSCG00000028031	HDAC11	0.0137265
ENSSSCG00000008576		0.0137297
ENSSSCG00000012978	AP5B1	0.0137324
ENSSSCG00000007287	GSS	0.0137342
ENSSSCG00000024043	ADAMTS2	0.0137346
ENSSSCG00000005662	SPOUT1	0.0137769
ENSSSCG00000003105	SLC1A5	0.0137947
ENSSSCG00000012913	PPP1CA	0.0137989
ENSSSCG00000013884	MAP1S	0.0138196
ENSSSCG00000007669	GNB2	0.0138486
ENSSSCG00000017128		0.013852
ENSSSCG00000033978		0.0138555
ENSSSCG00000029521	CD82	0.0138628
ENSSSCG00000005593	OLFML2A	0.0139201
ENSSSCG00000038360		0.0139305
ENSSSCG00000008038	SLC9A3R2	0.013944
ENSSSCG00000030328	NDUFB10	0.0140047
ENSSSCG00000030130	DPYSL2	0.0140343
ENSSSCG00000037479		0.0140674
ENSSSCG00000010735	LHPP	0.0141503
ENSSSCG00000024676	SRPK3	0.0142103
ENSSSCG00000008147	FHL2	0.0142705
ENSSSCG00000030196	CUL9	0.0142732
ENSSSCG00000008101	FBLN7	0.0142734
ENSSSCG00000007776	BCL7C	0.0142809
ENSSSCG00000007306		0.0143089
ENSSSCG00000026152	PRKD2	0.0144137
ENSSSCG00000014565		0.0144468
ENSSSCG00000012838	TSPAN4	0.0144472
ENSSSCG00000010568	NPM3	0.0144539
ENSSSCG00000003491	AKR7A2	0.0144678
ENSSSCG00000009784	ABCB9	0.0145563
ENSSSCG00000009614	FAM160B2	0.014583
ENSSSCG00000015859	SAP130	0.0145969
ENSSSCG00000037360	CST3	0.0146383
ENSSSCG00000026092	SREBF2	0.0146471
ENSSSCG00000031819	TP53I11	0.0146603
ENSSSCG00000007763	BCKDK	0.0147202
ENSSSCG00000000376	SUOX	0.0147543
ENSSSCG00000002002	IRF9	0.0147577
ENSSSCG00000025133	ITGB2	0.01477
ENSSSCG00000005613	LRSAM1	0.0147705
ENSSSCG00000002868	PEPD	0.014776
ENSSSCG00000029256	AKR1A1	0.0148053
ENSSSCG00000039355		0.014833
ENSSSCG00000003088	APOE	0.0148667
ENSSSCG00000015203	ROBO4	0.0149254
ENSSSCG00000028052	OBSL1	0.0149307
ENSSSCG00000006776	MOV10	0.0149605
ENSSSCG00000029785	RPS9	0.0150142
ENSSSCG00000034360	CELSR2	0.0150161
ENSSSCG00000001362	MDC1	0.0150183
ENSSSCG00000005615	PTRH1	0.015023
ENSSSCG00000014351		0.0150356
ENSSSCG00000006827	CYB561D1	0.0150487
ENSSSCG00000001346	ABCF1	0.0150542
ENSSSCG00000017917	MINK1	0.0150594
ENSSSCG00000029362	CHMP2A	0.0150642
ENSSSCG00000007282	PIGU	0.0150646
ENSSSCG00000039056	GAS7	0.015067
ENSSSCG00000017227	FDXR	0.015085
ENSSSCG00000013181	SERPING1	0.0151022
ENSSSCG00000021289	GAK	0.0151078
ENSSSCG00000010331	ANXA11	0.0151105
ENSSSCG00000001409	PRRC2A	0.0152563
ENSSSCG00000038401	TRAM2	0.0152952
ENSSSCG00000031830		0.0153103
ENSSSCG00000030255	EIF4G1	0.0153766
ENSSSCG00000010108	KLHL22	0.0153837
ENSSSCG00000025023	PGGHG	0.0154069
ENSSSCG00000026412	PLXNA2	0.0154182
ENSSSCG00000036402	MYL9	0.0154363
ENSSSCG00000003187	FCGRT	0.0154623
ENSSSCG00000017882	MYBBP1A	0.0155532
ENSSSCG00000003694	EMILIN2	0.0155812
ENSSSCG00000007728		0.0155913
ENSSSCG00000001423	NELFE	0.0156015
ENSSSCG00000039148	P4HB	0.0156241
ENSSSCG00000015080	CEP164	0.0156246
ENSSSCG00000032942		0.0156925
ENSSSCG00000014833	UCP2	0.0156973
ENSSSCG00000000050	NAGA	0.0157768
ENSSSCG00000007324	SOGA1	0.0158303
ENSSSCG00000017818	SERPINF1	0.0158403
ENSSSCG00000013744	TRMT1	0.0159034
ENSSSCG00000005380	COL15A1	0.0159201
ENSSSCG00000024070		0.0159673
ENSSSCG00000029251		0.0161056
ENSSSCG00000012842	RPLP2	0.0161298
ENSSSCG00000034153	TAF6	0.016135
ENSSSCG00000001914	LOXL1	0.0162105
ENSSSCG00000031692		0.01622
ENSSSCG00000023318	MARS	0.0162247
ENSSSCG00000038912	IFITM3	0.0162355
ENSSSCG00000035176	SEMA6B	0.0162566
ENSSSCG00000013990	GUK1	0.0162632
ENSSSCG00000006453	KIRREL1	0.0162686
ENSSSCG00000038514	DDAH2	0.0162704
ENSSSCG00000032932	MSRB1	0.0162877
ENSSSCG00000014339	CTNNA1	0.0162918
ENSSSCG00000014792	STIM1	0.0163682
ENSSSCG00000007815	GTF3C1	0.0163776
ENSSSCG00000015107	VPS11	0.0163929
ENSSSCG00000034131	TXNDC5	0.016445
ENSSSCG00000036436	FZD1	0.0164565
ENSSSCG00000024570	KDM4B	0.0164883
ENSSSCG00000013747	RAD23A	0.0164913
ENSSSCG00000004771		0.0165215
ENSSSCG00000021706	KIF21B	0.0165467
ENSSSCG00000030947	ZFAT	0.0165492
ENSSSCG00000014811	INPPL1	0.0166198
ENSSSCG00000001242	GABBR1	0.0167258
ENSSSCG00000015326	COL1A2	0.0167295
ENSSSCG00000017335	HEXIM2	0.0167423
ENSSSCG00000034189		0.0167575
ENSSSCG00000038079	CLPP	0.0168122
ENSSSCG00000027538	TMEM258	0.0168273
ENSSSCG00000033968		0.0169024
ENSSSCG00000029189	DCHS1	0.0169324
ENSSSCG00000036569	PTP4A3	0.0169348
ENSSSCG00000017929	RNASEK	0.016935
ENSSSCG00000037077	SHMT2	0.0169795
ENSSSCG00000024990	MPI	0.0169896
ENSSSCG00000034448		0.016999
ENSSSCG00000024672	KLF16	0.0170025
ENSSSCG00000017146		0.0170044
ENSSSCG00000013758	ZSWIM4	0.0170117
ENSSSCG00000009620	BMP1	0.0170474
ENSSSCG00000040989	GPRC5C	0.0170745
ENSSSCG00000040835		0.0171427
ENSSSCG00000010799	COG7	0.017169
ENSSSCG00000014855	RPS3	0.0171935
ENSSSCG00000014395	PCDH12	0.0171983
ENSSSCG00000029304	STEAP3	0.0172063
ENSSSCG00000010586	SUFU	0.0172121
ENSSSCG00000004412	MICAL1	0.0172892
ENSSSCG00000016593	ARF5	0.0172947
ENSSSCG00000040556		0.017379
ENSSSCG00000005318	CREB3	0.017387
ENSSSCG00000002926	TBCB	0.0174071
ENSSSCG00000025425	FCSK	0.0174073
ENSSSCG00000001532	UHRF1BP1	0.017422
ENSSSCG00000003257	CACNG6	0.0174292
ENSSSCG00000025034	LAPTM5	0.0174344
ENSSSCG00000002998	SNRPA	0.0174358
ENSSSCG00000006157	MSTO1	0.0174871
ENSSSCG00000001987	RIPK3	0.0175014
ENSSSCG00000032642	DDX41	0.0175049
ENSSSCG00000006829	SYPL2	0.0175272
ENSSSCG00000039324	FLII	0.0175486
ENSSSCG00000022647	TIMM17B	0.017624
ENSSSCG00000038126	MGAT3	0.0176536
ENSSSCG00000016192	PLCD4	0.0176909
ENSSSCG00000013496	SIRT6	0.017736
ENSSSCG00000037777		0.0178314
ENSSSCG00000037568	RAB43	0.0178413
ENSSSCG00000011110	CCDC3	0.017881
ENSSSCG00000017383		0.0179008
ENSSSCG00000029949	CD248	0.0179016
ENSSSCG00000009972	KREMEN1	0.0179708
ENSSSCG00000002269	MTHFD1	0.0179752
ENSSSCG00000017866	TAX1BP3	0.0179865
ENSSSCG00000023485	PCDHGB5	0.0180014
ENSSSCG00000021861	PIGT	0.0180042
ENSSSCG00000024134	MGLL	0.018036
ENSSSCG00000001410	BAG6	0.0181047
ENSSSCG00000024001	PLXNA1	0.0181439
ENSSSCG00000003479	MFAP2	0.0183066
ENSSSCG00000033123	TMEM97	0.0183107
ENSSSCG00000004018	AFDN	0.0183737
ENSSSCG00000000059	XRCC6	0.0183785
ENSSSCG00000023379	UBE2L6	0.0183908
ENSSSCG00000023325		0.0184549
ENSSSCG00000032761		0.0184688
ENSSSCG00000012886		0.0185507
ENSSSCG00000038540		0.0185761
ENSSSCG00000031941	MED22	0.018595
ENSSSCG00000002298	ZFYVE26	0.0186249
ENSSSCG00000003168	ALDH16A1	0.0186407
ENSSSCG00000016754	AEBP1	0.018668
ENSSSCG00000034608	TMEM94	0.0186831
ENSSSCG00000037531	MAP3K11	0.0186988
ENSSSCG00000032024	URB1	0.018711
ENSSSCG00000011368	P4HTM	0.0187388
ENSSSCG00000013475	NCLN	0.0188282
ENSSSCG00000037530	TACC2	0.0189287
ENSSSCG00000036307		0.018947
ENSSSCG00000001476	HSD17B8	0.0189588
ENSSSCG00000015270	FMOD	0.0189723
ENSSSCG00000014365		0.0190379
ENSSSCG00000007681	CUX1	0.0190572
ENSSSCG00000012847	TALDO1	0.0190613
ENSSSCG00000013878	PGLS	0.0190855
ENSSSCG00000017333	FMNL1	0.0190877
ENSSSCG00000033169	RPS15	0.019116
ENSSSCG00000013572	PNPLA6	0.0191592
ENSSSCG00000033920	CTU2	0.0191621
ENSSSCG00000009860	FBXW8	0.0191713
ENSSSCG00000017208	SLC25A19	0.0192305
ENSSSCG00000033514	CRHR2	0.0192625
ENSSSCG00000000267	C12orf10	0.0192959
ENSSSCG00000016737		0.0193161
ENSSSCG00000003081	CEACAM16	0.0193235
ENSSSCG00000025027	METTL1	0.0193249
ENSSSCG00000012680	GPC3	0.0193461
ENSSSCG00000022741	PDGFRB	0.0193738
ENSSSCG00000024626	TNFAIP1	0.019397
ENSSSCG00000033262		0.0194095
ENSSSCG00000032787	ALAD	0.0194131
ENSSSCG00000009898	GCN1	0.0194223
ENSSSCG00000033697	RPS2	0.0194226
ENSSSCG00000035511	C1QTNF1	0.0194321
ENSSSCG00000035585		0.019433
ENSSSCG00000025363	SNX17	0.0194363
ENSSSCG00000029519	CIAPIN1	0.0194529
ENSSSCG00000039847		0.0194781
ENSSSCG00000017204	ITGB4	0.0195338
ENSSSCG00000014011	RASGEF1C	0.0195454
ENSSSCG00000020813	FAM20C	0.0195702
ENSSSCG00000012270	UBA1	0.0196416
ENSSSCG00000013017	EHD1	0.0196545
ENSSSCG00000035995	ITPA	0.0196737
ENSSSCG00000029070	PAFAH1B3	0.0196776
ENSSSCG00000016210	ABCB6	0.0196894
ENSSSCG00000010520	MMS19	0.0197603
ENSSSCG00000012914	RAD9A	0.0197912
ENSSSCG00000029630	TAF10	0.019809
ENSSSCG00000012328	HUWE1	0.0198704
ENSSSCG00000017232	SLC9A3R1	0.0198723
ENSSSCG00000028707	NF2	0.0198733
ENSSSCG00000030921	APOA1	0.0199104
ENSSSCG00000035029	NOVA2	0.0199262
ENSSSCG00000025981	SLC38A5	0.0199585
ENSSSCG00000020817	RPS16	0.0199752
ENSSSCG00000009004	SFRP2	0.0199777
ENSSSCG00000017087	GM2A	0.0199803
ENSSSCG00000035446	CAVIN1	0.019982
ENSSSCG00000039523		0.0199841
ENSSSCG00000024158	ANO1	0.019992
ENSSSCG00000003862	CC2D1B	0.0200058
ENSSSCG00000013856	AP1M1	0.0200665
ENSSSCG00000005906		0.0200715
ENSSSCG00000013001	MRPL49	0.020104
ENSSSCG00000035997	RPL10	0.0201105
ENSSSCG00000040875	ZFPM1	0.0201433
ENSSSCG00000040470	RPS20	0.020185
ENSSSCG00000013481	FZR1	0.0201889
ENSSSCG00000013094	DDB1	0.0202196
ENSSSCG00000002495	SYNE3	0.0202493
ENSSSCG00000008698	RGS12	0.0202721
ENSSSCG00000005358		0.0202799
ENSSSCG00000027840		0.0203057
ENSSSCG00000008305	SMYD5	0.0203115
ENSSSCG00000005904	VPS28	0.0203222
ENSSSCG00000033500	SNRPD2	0.0203309
ENSSSCG00000008226	POLR1A	0.0203633
ENSSSCG00000013020	MAP4K2	0.0203753
ENSSSCG00000009626	SORBS3	0.0204064
ENSSSCG00000005666	DOLK	0.0204295
ENSSSCG00000017936		0.0204298
ENSSSCG00000030030	FBH1	0.0204694
ENSSSCG00000011404	HYAL1	0.0204866
ENSSSCG00000001917	CD276	0.020491
ENSSSCG00000001571	MTCH1	0.0205065
ENSSSCG00000011410	CYB561D2	0.0205137
ENSSSCG00000016569	SMO	0.0205315
ENSSSCG00000003513	ECE1	0.0205646
ENSSSCG00000000034	TTLL12	0.0206024
ENSSSCG00000000444	DCTN2	0.02064
ENSSSCG00000003132		0.0206735
ENSSSCG00000012857	CARS	0.0207381
ENSSSCG00000017072	GALNT10	0.0207556
ENSSSCG00000037343	MRPS11	0.0208208
ENSSSCG00000010067	MIF	0.0208244
ENSSSCG00000000433	B4GALNT1	0.0208245
ENSSSCG00000023973	NOC2L	0.0209688
ENSSSCG00000023526	RAPGEF3	0.0210212
ENSSSCG00000013775	ADGRE5	0.0210612
ENSSSCG00000013072	FADS2	0.021062
ENSSSCG00000009957	MYO18B	0.0210985
ENSSSCG00000009213		0.0211219
ENSSSCG00000010773	TUBGCP2	0.021205
ENSSSCG00000039607	EXOC3	0.0212264
ENSSSCG00000022204	AGRN	0.0213525
ENSSSCG00000010083	PPIL2	0.0213699
ENSSSCG00000010599	PDCD11	0.0213823
ENSSSCG00000015110	DPAGT1	0.0214663
ENSSSCG00000007944		0.0215791
ENSSSCG00000013620	PLPPR2	0.0216937
ENSSSCG00000040513	AQP3	0.0217133
ENSSSCG00000003904	LRRC41	0.0217522
ENSSSCG00000017215	SLC16A5	0.0217611
ENSSSCG00000037013	WFIKKN1	0.0218595
ENSSSCG00000026516	EPHB3	0.0218766
ENSSSCG00000027205	LPCAT3	0.021899
ENSSSCG00000003983	SMAP2	0.0219698
ENSSSCG00000013745	FARSA	0.0219741
ENSSSCG00000039468	SERPINH1	0.0220591
ENSSSCG00000038879	RELB	0.0220633
ENSSSCG00000037209	TLNRD1	0.0220761
ENSSSCG00000021181	DHCR7	0.022138
ENSSSCG00000002235	LPCAT4	0.022146
ENSSSCG00000010092	PI4KA	0.0221851
ENSSSCG00000017359	RUNDC3A	0.0222341
ENSSSCG00000003413	MTOR	0.022391
ENSSSCG00000034288	AP4M1	0.0224461
ENSSSCG00000028387	CNKSR1	0.0224498
ENSSSCG00000001679	XPO5	0.0224825
ENSSSCG00000009664	PTK2B	0.0225214
ENSSSCG00000013514		0.0225311
ENSSSCG00000007285	GGT7	0.0226093
ENSSSCG00000007803	TUFM	0.0226655
ENSSSCG00000021944	RAC2	0.0226674
ENSSSCG00000028282	SLC1A4	0.0226684
ENSSSCG00000013444	BTBD2	0.0227055
ENSSSCG00000032782	PNPO	0.0227551
ENSSSCG00000001396		0.0228294
ENSSSCG00000016585	IMPDH1	0.0228797
ENSSSCG00000006392	IGSF8	0.0229309
ENSSSCG00000003950	TIE1	0.0229713
ENSSSCG00000005533	PTGS1	0.0229829
ENSSSCG00000009739	NOC4L	0.0230617
ENSSSCG00000038229	EML2	0.0230644
ENSSSCG00000002776	ATP6V0D1	0.0230985
ENSSSCG00000010514	RRP12	0.0231136
ENSSSCG00000024784	CACNA1S	0.0232409
ENSSSCG00000010703	HTRA1	0.0232513
ENSSSCG00000008238	ELMOD3	0.0232966
ENSSSCG00000025928	RPL18	0.0233118
ENSSSCG00000003551	PAQR7	0.0233275
ENSSSCG00000001654	PPP2R5D	0.0233277
ENSSSCG00000006524	THBS3	0.0234095
ENSSSCG00000033892	EVA1B	0.0234099
ENSSSCG00000023890	ATG2A	0.0234666
ENSSSCG00000002016	THTPA	0.0234736
ENSSSCG00000040100		0.0234742
ENSSSCG00000012970	CTSW	0.023513
ENSSSCG00000002787	E2F4	0.0235334
ENSSSCG00000024578	PHLDB1	0.0236068
ENSSSCG00000037979		0.0236204
ENSSSCG00000014043		0.0236409
ENSSSCG00000033606	HIST1H2AC	0.0237069
ENSSSCG00000000292	ZNF385A	0.0237783
ENSSSCG00000014396	DELE1	0.0238028
ENSSSCG00000000261		0.0238828
ENSSSCG00000012271	RBM10	0.02389
ENSSSCG00000009872	PLBD2	0.0239067
ENSSSCG00000004962	CORO2B	0.0239126
ENSSSCG00000016743	OGDH	0.0240255
ENSSSCG00000031144	RAMP3	0.0240508
ENSSSCG00000006500	UBQLN4	0.0241253
ENSSSCG00000017783		0.0241557
ENSSSCG00000003100	CCDC61	0.0241736
ENSSSCG00000003195	PNKP	0.0241849
ENSSSCG00000038956	HEYL	0.0242194
ENSSSCG00000029830		0.0242515
ENSSSCG00000017340	DCAKD	0.0242817
ENSSSCG00000013511	HDGFL2	0.0243796
ENSSSCG00000024263	SERF2	0.0243865
ENSSSCG00000034314	LSM4	0.0244262
ENSSSCG00000003930	RPS8	0.024452
ENSSSCG00000022004	SH3BP2	0.024475
ENSSSCG00000010059	GUCD1	0.0244877
ENSSSCG00000012859	NADSYN1	0.0244991
ENSSSCG00000021596		0.024503
ENSSSCG00000038706	C1QC	0.0245167
ENSSSCG00000024119	GLB1	0.0245391
ENSSSCG00000032188	METTL26	0.0245605
ENSSSCG00000025537	PTPN6	0.0245765
ENSSSCG00000008194	ACTR1B	0.0246198
ENSSSCG00000013752	STX10	0.0246543
ENSSSCG00000012822	MPP1	0.0247086
ENSSSCG00000032137		0.0247319
ENSSSCG00000007558	INTS1	0.0247591
ENSSSCG00000038960		0.0247922
ENSSSCG00000007286	ACSS2	0.0247948
ENSSSCG00000037487		0.0248083
ENSSSCG00000009758	DHX37	0.0248444
ENSSSCG00000027135	PPM1G	0.0248526
ENSSSCG00000013864	TMEM38A	0.0248788
ENSSSCG00000003040	ARHGEF1	0.0249165
ENSSSCG00000023837	WFDC1	0.0249238
ENSSSCG00000029944	FASN	0.0249382
ENSSSCG00000005773	RBFA	0.0250324
ENSSSCG00000017902	CAMTA2	0.0250601
ENSSSCG00000023639	NRM	0.0250651
ENSSSCG00000013039	NUDT22	0.0252018
ENSSSCG00000014017	MGAT4B	0.0252756
ENSSSCG00000001420	EHMT2	0.0253191
ENSSSCG00000037102	FSTL3	0.0253243
ENSSSCG00000039962	HSPB1	0.0253288
ENSSSCG00000002457	ITPK1	0.0254444
ENSSSCG00000004918	ALPK2	0.025451
ENSSSCG00000012791	NAA10	0.025452
ENSSSCG00000010053		0.025467
ENSSSCG00000029411	CAPN2	0.0255104
ENSSSCG00000036926	MVB12B	0.02553
ENSSSCG00000030798	FUS	0.0256147
ENSSSCG00000002669	CRISPLD2	0.025621
ENSSSCG00000024413	PPP2R1A	0.0256388
ENSSSCG00000009938	UNG	0.025692
ENSSSCG00000001700	SLC29A1	0.0257169
ENSSSCG00000021519	CPNE2	0.0257256
ENSSSCG00000021319	ALG3	0.0258634
ENSSSCG00000006325	MGST3	0.0258961
ENSSSCG00000017565	SPATA20	0.0258992
ENSSSCG00000040857	SNRPB	0.025919
ENSSSCG00000003663	HPCAL1	0.0260246
ENSSSCG00000017472	IGFBP4	0.0260248
ENSSSCG00000032022	GCHFR	0.0260421
ENSSSCG00000017515	TBKBP1	0.026128
ENSSSCG00000037566		0.0261658
ENSSSCG00000007115		0.026216
ENSSSCG00000007147	HSPA12B	0.0263037
ENSSSCG00000003042		0.0263104
ENSSSCG00000022609	WWP2	0.0263578
ENSSSCG00000026989		0.0263712
ENSSSCG00000017511	PLXDC1	0.0264008
ENSSSCG00000039424	MCRIP1	0.0264397
ENSSSCG00000009783	OGFOD2	0.0264422
ENSSSCG00000009914		0.0264497
ENSSSCG00000017489	PSMD3	0.0264571
ENSSSCG00000028889	VPS37B	0.0264803
ENSSSCG00000013041	FERMT3	0.0265527
ENSSSCG00000014349	TMEM173	0.026566
ENSSSCG00000001696		0.0266292
ENSSSCG00000006468	HDGF	0.0266314
ENSSSCG00000002763	PRMT7	0.0266459
ENSSSCG00000023354	ACAD9	0.0266916
ENSSSCG00000012997		0.0268262
ENSSSCG00000007430	NEURL2	0.0268265
ENSSSCG00000003301	PPP6R1	0.0268685
ENSSSCG00000012965	DRAP1	0.0269802
ENSSSCG00000000759	WNT5B	0.0270146
ENSSSCG00000027629	CDIPT	0.027031
ENSSSCG00000011390	IP6K1	0.0270452
ENSSSCG00000008022	TELO2	0.0270505
ENSSSCG00000003198	FUZ	0.0271645
ENSSSCG00000000133	TST	0.0272242
ENSSSCG00000013508	SH3GL1	0.0272566
ENSSSCG00000039542	CNN2	0.0272855
ENSSSCG00000010579	GBF1	0.0272983
ENSSSCG00000008836	SCFD2	0.0273182
ENSSSCG00000012920	CORO1B	0.027386
ENSSSCG00000013005	VPS51	0.0274181
ENSSSCG00000013897	RAB3A	0.02742
ENSSSCG00000027973	COG4	0.0275061
ENSSSCG00000018033	UBB	0.0275118
ENSSSCG00000001341		0.0276148
ENSSSCG00000035123	COMMD5	0.0276244
ENSSSCG00000032078	ZNF362	0.0276308
ENSSSCG00000039635		0.0276743
ENSSSCG00000014568	ST5	0.0276874
ENSSSCG00000037120	TK1	0.0276893
ENSSSCG00000036568	MVB12A	0.0277171
ENSSSCG00000025117	ATN1	0.0277173
ENSSSCG00000015074	SIDT2	0.0277368
ENSSSCG00000003155	PPP1R15A	0.0277595
ENSSSCG00000007289	TRPC4AP	0.0279272
ENSSSCG00000034350	SERHL2	0.0279322
ENSSSCG00000029509	KIF22	0.0279371
ENSSSCG00000003268	TSEN34	0.0279747
ENSSSCG00000011560	CRELD1	0.027988
ENSSSCG00000003085	CLPTM1	0.0279979
ENSSSCG00000032549	GNA12	0.0280285
ENSSSCG00000024655	PHB2	0.0280392
ENSSSCG00000030174	AP3S2	0.0280492
ENSSSCG00000040519	URGCP	0.0280821
ENSSSCG00000011158	PFKP	0.0281194
ENSSSCG00000012853	IRF7	0.0281765
ENSSSCG00000009814	ANAPC5	0.0282177
ENSSSCG00000020871		0.0282426
ENSSSCG00000015734	IMP4	0.0283719
ENSSSCG00000022901	KLHDC3	0.0283863
ENSSSCG00000009244	SEC31A	0.0284472
ENSSSCG00000017812	VPS53	0.0284512
ENSSSCG00000012578		0.0286177
ENSSSCG00000015453	PDIA4	0.0286201
ENSSSCG00000003612	EIF3I	0.0286362
ENSSSCG00000027689	SRM	0.0287352
ENSSSCG00000001477	RING1	0.0287781
ENSSSCG00000028794		0.0288788
ENSSSCG00000015742	TMEM177	0.0289427
ENSSSCG00000033689	GPS1	0.0290118
ENSSSCG00000015106	HYOU1	0.0290299
ENSSSCG00000027514	ELP5	0.0290622
ENSSSCG00000010276	UNC5B	0.0290772
ENSSSCG00000001910	ISLR	0.0290931
ENSSSCG00000032994	RNF187	0.0292293
ENSSSCG00000012348	APEX2	0.0292595
ENSSSCG00000036575	USHBP1	0.0292749
ENSSSCG00000001022	SSR1	0.0292774
ENSSSCG00000023820	ZMIZ2	0.029287
ENSSSCG00000007817	IL4R	0.0293766
ENSSSCG00000038234	TMEM175	0.0294214
ENSSSCG00000002267	RGMA	0.0294223
ENSSSCG00000021084	S100A6	0.0295847
ENSSSCG00000015233	RPUSD4	0.0296
ENSSSCG00000007992	PIGQ	0.0296078
ENSSSCG00000022454	NRBP1	0.0296098
ENSSSCG00000005664	LRRC8A	0.0296802
ENSSSCG00000000276	TARBP2	0.0297018
ENSSSCG00000003148	DBP	0.0297362
ENSSSCG00000035297	ISG12(A)	0.029758
ENSSSCG00000031142	NMNAT3	0.029784
ENSSSCG00000026169	MFSD12	0.0297988
ENSSSCG00000013269	MAPK8IP1	0.0298291
ENSSSCG00000034045	ERGIC3	0.0298379
ENSSSCG00000028346	SAMM50	0.0298742
ENSSSCG00000014632	FAM160A2	0.0298966
ENSSSCG00000011592	PLXND1	0.0299434
ENSSSCG00000003941	SZT2	0.0299731
ENSSSCG00000006539	SHC1	0.0299744
ENSSSCG00000031468		0.0300783
ENSSSCG00000036521	TNFSF13	0.0301261
ENSSSCG00000007687	LRWD1	0.0301487
ENSSSCG00000005918	DGAT1	0.0301724
ENSSSCG00000016578	FLNC	0.0301742
ENSSSCG00000018023	COX10	0.0302427
ENSSSCG00000001544	TEAD3	0.0302587
ENSSSCG00000034927		0.0303444
ENSSSCG00000013064	EEF1G	0.0303704
ENSSSCG00000013432	MIDN	0.0304578
ENSSSCG00000005925	EXOSC4	0.0305241
ENSSSCG00000029474	AVEN	0.0305273
ENSSSCG00000001435	AGPAT1	0.0305745
ENSSSCG00000017817	PRPF8	0.0306352
ENSSSCG00000023611		0.0306514
ENSSSCG00000001930		0.0307674
ENSSSCG00000038492	PHETA2	0.0307704
ENSSSCG00000008682	NSD2	0.03087
ENSSSCG00000003068	SMG9	0.0309221
ENSSSCG00000004971	TLE3	0.0309399
ENSSSCG00000015071	SIK3	0.0310883
ENSSSCG00000007334	SRC	0.0311137
ENSSSCG00000024809	CLCN4	0.0312373
ENSSSCG00000010105	SMPD4	0.031253
ENSSSCG00000029627		0.0312643
ENSSSCG00000002517	WDR25	0.0313156
ENSSSCG00000013419	R3HDM4	0.0313277
ENSSSCG00000026794	SIRT2	0.0313584
ENSSSCG00000008309	SPR	0.0313752
ENSSSCG00000017389	RAMP2	0.0314119
ENSSSCG00000006535	PMVK	0.0314273
ENSSSCG00000025568	TEAD2	0.0314423
ENSSSCG00000029185	MAPRE3	0.031463
ENSSSCG00000009215	ABCG2	0.031473
ENSSSCG00000028865	SAP18	0.0316778
ENSSSCG00000022058		0.0317036
ENSSSCG00000039094	PLEC	0.0317437
ENSSSCG00000014812	FOLR2	0.0317774
ENSSSCG00000011387	RNF123	0.0317814
ENSSSCG00000005608	ANGPTL2	0.0318501
ENSSSCG00000032803	CYP2S1	0.0320081
ENSSSCG00000037793	NIT1	0.032031
ENSSSCG00000020835		0.0320376
ENSSSCG00000005316		0.0320428
ENSSSCG00000003524	C1QA	0.0320573
ENSSSCG00000013468	THOP1	0.0322443
ENSSSCG00000013445	CSNK1G2	0.032299
ENSSSCG00000003216	POLD1	0.0323117
ENSSSCG00000008232	RNF181	0.0323194
ENSSSCG00000012905	TMEM134	0.032371
ENSSSCG00000013633	CARM1	0.0324029
ENSSSCG00000039267	ATP6V0B	0.0324407
ENSSSCG00000025176	NOTCH3	0.0325097
ENSSSCG00000031724	LYNX1	0.0325961
ENSSSCG00000003150	NUCB1	0.0327227
ENSSSCG00000002916	APLP1	0.0327492
ENSSSCG00000025264	PQBP1	0.0327511
ENSSSCG00000021250	FKBP9	0.0328504
ENSSSCG00000012973	MUS81	0.0328525
ENSSSCG00000018034		0.0328625
ENSSSCG00000033627	YIPF3	0.0328638
ENSSSCG00000014369	CD14	0.0328837
ENSSSCG00000008077	CARD19	0.0328857
ENSSSCG00000000290	COPZ1	0.0328902
ENSSSCG00000013905	FKBP8	0.0328914
ENSSSCG00000040643	CAV3	0.0328933
ENSSSCG00000010132	COMT	0.0329152
ENSSSCG00000014375	HARS	0.0329381
ENSSSCG00000025673		0.0330634
ENSSSCG00000011330	NBEAL2	0.0331133
ENSSSCG00000014919	ME3	0.0332356
ENSSSCG00000011346	PLXNB1	0.0332709
ENSSSCG00000014891	GAB2	0.0332829
ENSSSCG00000014575		0.0333801
ENSSSCG00000022725	FLOT1	0.0334108
ENSSSCG00000038806	AXL	0.0334409
ENSSSCG00000005320	RGP1	0.0335137
ENSSSCG00000004408	SMPD2	0.0336916
ENSSSCG00000010130	GNB1L	0.0337507
ENSSSCG00000030544	TMEM143	0.0337598
ENSSSCG00000028806	RPS6KA4	0.0337916
ENSSSCG00000014029	COL23A1	0.0338212
ENSSSCG00000021472	POLR2E	0.0338296
ENSSSCG00000024184	FASTK	0.0338303
ENSSSCG00000015200	ESAM	0.033973
ENSSSCG00000035442	SLC36A1	0.0340106
ENSSSCG00000014540		0.0340382
ENSSSCG00000001727	TNFRSF21	0.0341104
ENSSSCG00000005646	COQ4	0.0341235
ENSSSCG00000029102	MED24	0.0341661
ENSSSCG00000027486	TRIP6	0.0341749
ENSSSCG00000039235	PSMC4	0.0341877
ENSSSCG00000006385	NCSTN	0.0342477
ENSSSCG00000007719	CLIP2	0.0342701
ENSSSCG00000039782	STOML2	0.0343368
ENSSSCG00000017913		0.0343948
ENSSSCG00000032833	CD320	0.0344634
ENSSSCG00000031082	ATP13A2	0.0345478
ENSSSCG00000040012	TMEM147	0.0345563
ENSSSCG00000006369	F11R	0.0346689
ENSSSCG00000037318	TRABD2B	0.0349588
ENSSSCG00000031249	PTTG1IP	0.0350008
ENSSSCG00000027426	BCL3	0.0350797
ENSSSCG00000028018	EP400	0.0352165
ENSSSCG00000010317	DUPD1	0.0353042
ENSSSCG00000023177	RRP9	0.0353097
ENSSSCG00000007586	FSCN1	0.0353186
ENSSSCG00000003914	PRDX1	0.0353725
ENSSSCG00000013756	MRI1	0.0354172
ENSSSCG00000008241		0.035432
ENSSSCG00000000359		0.0354797
ENSSSCG00000022265	C19orf25	0.0355024
ENSSSCG00000040186	C12orf57	0.0356938
ENSSSCG00000003332	SDF4	0.0357575
ENSSSCG00000026752	BYSL	0.0357735
ENSSSCG00000039535	CAMK2B	0.0357758
ENSSSCG00000010981	NUDT2	0.0357872
ENSSSCG00000008287		0.0358015
ENSSSCG00000031381		0.035813
ENSSSCG00000012939	BRMS1	0.035834
ENSSSCG00000013403	GALNT18	0.036049
ENSSSCG00000007426	ACOT8	0.0362174
ENSSSCG00000014036	TMED9	0.0362313
ENSSSCG00000029590	ACD	0.0362456
ENSSSCG00000040207	P2RY2	0.0362515
ENSSSCG00000002640	DEF8	0.0362596
ENSSSCG00000020785	DES	0.0362606
ENSSSCG00000036746	RASL10B	0.0363339
ENSSSCG00000002873	GPI	0.0363538
ENSSSCG00000034096	DMAP1	0.0363628
ENSSSCG00000012790	ARHGAP4	0.0363791
ENSSSCG00000001528		0.0364056
ENSSSCG00000002813	KATNB1	0.0365153
ENSSSCG00000040833	BRF2	0.0365499
ENSSSCG00000023483	PLXNA3	0.0366201
ENSSSCG00000033926	NUDT1	0.0366227
ENSSSCG00000039894		0.0367056
ENSSSCG00000013467	SGTA	0.0367512
ENSSSCG00000010525		0.0368617
ENSSSCG00000008304	PRADC1	0.0368828
ENSSSCG00000003196	PTOV1	0.0369123
ENSSSCG00000021092	FAM53C	0.0369911
ENSSSCG00000009931	MVK	0.0371047
ENSSSCG00000001062	DTNBP1	0.0372051
ENSSSCG00000010565	DPCD	0.03722
ENSSSCG00000008041	PKD1	0.0372679
ENSSSCG00000024052	GPX4	0.0372931
ENSSSCG00000038467		0.0373203
ENSSSCG00000002965	ACTN4	0.0373318
ENSSSCG00000024974	RPL13	0.0373329
ENSSSCG00000001658	MRPL2	0.0373468
ENSSSCG00000033509	SAMD11	0.0374515
ENSSSCG00000020777	TRIOBP	0.0374569
ENSSSCG00000037427	PTDSS2	0.0375517
ENSSSCG00000015250	ADAMTS15	0.0375834
ENSSSCG00000012116		0.0376144
ENSSSCG00000001824	ZXDC	0.0376268
ENSSSCG00000033985	FIZ1	0.0376287
ENSSSCG00000010199	RET	0.0376805
ENSSSCG00000011409		0.037703
ENSSSCG00000009808	TMEM120B	0.0377788
ENSSSCG00000008459		0.0378056
ENSSSCG00000003359	TPRG1L	0.0378186
ENSSSCG00000003089	TOMM40	0.0378874
ENSSSCG00000005715	PRRC2B	0.0378996
ENSSSCG00000036275	NSMCE1	0.0379012
ENSSSCG00000005477	FKBP15	0.0379354
ENSSSCG00000017398	COASY	0.0379515
ENSSSCG00000000980	ALG12	0.037978
ENSSSCG00000013731	DNASE2	0.038093
ENSSSCG00000003218	MYBPC2	0.0381256
ENSSSCG00000032941	SIK2	0.0381843
ENSSSCG00000028723	CCDC102A	0.0382495
ENSSSCG00000035904	RPL7A	0.038308
ENSSSCG00000033327	PDGFB	0.0383216
ENSSSCG00000032467	RAB5C	0.0383499
ENSSSCG00000000141	EIF3D	0.038499
ENSSSCG00000003013	B9D2	0.0385581
ENSSSCG00000004489	EEF1A1	0.0385822
ENSSSCG00000007264		0.0386282
ENSSSCG00000023255	MOSPD3	0.0386661
ENSSSCG00000001008	BPHL	0.0386752
ENSSSCG00000029456	SLC7A1	0.0387086
ENSSSCG00000023142	GAMT	0.038787
ENSSSCG00000032110		0.0388872
ENSSSCG00000002390	ANGEL1	0.0389618
ENSSSCG00000002723	AARS	0.0389649
ENSSSCG00000037047		0.038985
ENSSSCG00000005638		0.0390246
ENSSSCG00000012482	SRPX2	0.039032
ENSSSCG00000040732	WDR81	0.0390346
ENSSSCG00000008094	CHCHD5	0.0390521
ENSSSCG00000014051	TSPAN17	0.0390898
ENSSSCG00000007246	TM9SF4	0.0390941
ENSSSCG00000013629	SMARCA4	0.0391654
ENSSSCG00000037237	COMTD1	0.0392218
ENSSSCG00000028720	NXN	0.0392408
ENSSSCG00000006737	IGSF3	0.0392595
ENSSSCG00000038950	VARS	0.0393273
ENSSSCG00000025842	SPAG8	0.0393967
ENSSSCG00000038938	FIS1	0.0394569
ENSSSCG00000033512	C1QB	0.0394659
ENSSSCG00000011620	RUVBL1	0.0394663
ENSSSCG00000011499	LRIG1	0.0394783
ENSSSCG00000009786	HIP1R	0.0395551
ENSSSCG00000028755	EIPR1	0.0396708
ENSSSCG00000016290	EFHD1	0.039804
ENSSSCG00000004745	RPAP1	0.039837
ENSSSCG00000004002	RPS5	0.039852
ENSSSCG00000003120	NAPA	0.0398556
ENSSSCG00000011598	FGD5	0.0399251
ENSSSCG00000021333	PAK4	0.0399963
ENSSSCG00000015747		0.0400372
ENSSSCG00000038384	COX4I2	0.040121
ENSSSCG00000013906		0.040159
ENSSSCG00000024103		0.0402475
ENSSSCG00000012327	HSD17B10	0.0402769
ENSSSCG00000027573	RPL29	0.0402771
ENSSSCG00000016034	COL3A1	0.0402832
ENSSSCG00000001787	IL16	0.0403057
ENSSSCG00000038364		0.0403714
ENSSSCG00000039194	KANK2	0.0403957
ENSSSCG00000022672	TRPM4	0.040408
ENSSSCG00000003106	AP2S1	0.0404264
ENSSSCG00000011001	APTX	0.040444
ENSSSCG00000010798	GGA2	0.0405935
ENSSSCG00000007811	SPNS1	0.0405998
ENSSSCG00000000694	GAPDH	0.0408084
ENSSSCG00000008039	NTHL1	0.0408097
ENSSSCG00000014287	SHROOM1	0.0408223
ENSSSCG00000023915	SLC2A4	0.0408335
ENSSSCG00000003197	MED25	0.0408833
ENSSSCG00000028076	ZBTB7C	0.0409451
ENSSSCG00000035256		0.0409575
ENSSSCG00000028638	UTP4	0.0409609
ENSSSCG00000034757		0.0409689
ENSSSCG00000000066	L3MBTL2	0.0410053
ENSSSCG00000026984	DIPK2B	0.0410687
ENSSSCG00000011437	ALAS1	0.041082
ENSSSCG00000037808		0.041158
ENSSSCG00000004970		0.0412346
ENSSSCG00000012087	SLC37A1	0.0412502
ENSSSCG00000013647	CDC37	0.0412919
ENSSSCG00000022536	SLC37A2	0.0413917
ENSSSCG00000022728	HOXC10	0.0414066
ENSSSCG00000025610	AGAP3	0.0414692
ENSSSCG00000024736	ACP4	0.0414726
ENSSSCG00000004551	ZNF609	0.0414875
ENSSSCG00000011359	ATRIP	0.0414903
ENSSSCG00000013510	UBXN6	0.0415257
ENSSSCG00000028048	ARHGEF15	0.0415835
ENSSSCG00000012679	GPC4	0.0415886
ENSSSCG00000017338	PLCD3	0.0416056
ENSSSCG00000038323	ACTN3	0.0416139
ENSSSCG00000001661	SRF	0.0416898
ENSSSCG00000016349	NDUFA10	0.0418855
ENSSSCG00000005640	CIZ1	0.0419174
ENSSSCG00000003229	ETFB	0.0419485
ENSSSCG00000008020	IFT140	0.0420218
ENSSSCG00000012934	CCS	0.0420591
ENSSSCG00000025321	MAZ	0.0420808
ENSSSCG00000006651	ADAMTSL4	0.0420869
ENSSSCG00000007478	ATP9A	0.0421085
ENSSSCG00000017207	NUP85	0.0422507
ENSSSCG00000024254	ALKBH7	0.0423367
ENSSSCG00000003458	CTRC	0.0423907
ENSSSCG00000013888	JAK3	0.042422
ENSSSCG00000007523	TUBB1	0.0424416
ENSSSCG00000029482	CHST15	0.0425054
ENSSSCG00000028635		0.0425094
ENSSSCG00000035103	PIGL	0.0425498
ENSSSCG00000025858	ELN	0.0425684
ENSSSCG00000017346	EFTUD2	0.0425734
ENSSSCG00000017201	UNK	0.0427418
ENSSSCG00000003264	CNOT3	0.042761
ENSSSCG00000026819	NID1	0.0428918
ENSSSCG00000035048	C1QBP	0.0429303
ENSSSCG00000035230	PIEZO1	0.04295
ENSSSCG00000023191	LYPLA2	0.043009
ENSSSCG00000005494	TNC	0.0430218
ENSSSCG00000012336	GNL3L	0.0430371
ENSSSCG00000023660	PARP1	0.0431595
ENSSSCG00000015108	HMBS	0.0432458
ENSSSCG00000029945	GCAT	0.0432755
ENSSSCG00000032073		0.0433064
ENSSSCG00000023229	ETV5	0.0433496
ENSSSCG00000017052	ADAM19	0.0433653
ENSSSCG00000035224		0.0434175
ENSSSCG00000007768	STX4	0.0434789
ENSSSCG00000032436		0.043498
ENSSSCG00000039360	LRFN4	0.0436516
ENSSSCG00000010972	DCTN3	0.0436808
ENSSSCG00000032488	ZADH2	0.0436815
ENSSSCG00000030045	PRMT5	0.0437227
ENSSSCG00000032059	PSENEN	0.0437305
ENSSSCG00000033082	HGS	0.0437447
ENSSSCG00000004506	CTIF	0.0438943
ENSSSCG00000003470	FAM131C	0.0439733
ENSSSCG00000022177	DIS3L2	0.0440279
ENSSSCG00000005658		0.0440645
ENSSSCG00000006954	EEF1D	0.0441944
ENSSSCG00000017199	TRIM47	0.0442442
ENSSSCG00000035134	MRPS7	0.0442571
ENSSSCG00000031269		0.0443645
ENSSSCG00000024864	ATXN10	0.0444044
ENSSSCG00000015227	SRPRA	0.0444653
ENSSSCG00000032959		0.0445104
ENSSSCG00000012054	DOP1B	0.04454
ENSSSCG00000000035	TTLL1	0.0445651
ENSSSCG00000013418	CFD	0.0447104
ENSSSCG00000033168	TMEM161A	0.0447696
ENSSSCG00000013766	IL27RA	0.0447897
ENSSSCG00000009999	TBC1D10A	0.044852
ENSSSCG00000017824		0.0448768
ENSSSCG00000036014	RPLP0	0.0448991
ENSSSCG00000030065	ZBTB47	0.0449028
ENSSSCG00000032842	GIPC1	0.0449317
ENSSSCG00000014277	IRF1	0.0450262
ENSSSCG00000009933	UBE3B	0.0450316
ENSSSCG00000013281	EXT2	0.0450869
ENSSSCG00000037398	NTAN1	0.0451237
ENSSSCG00000032711	DMAC2	0.0451316
ENSSSCG00000007705		0.0451615
ENSSSCG00000031600		0.0451684
ENSSSCG00000033660		0.0452294
ENSSSCG00000015256	JAM3	0.0453723
ENSSSCG00000017397	MLX	0.0453761
ENSSSCG00000036132	CKM	0.0453988
ENSSSCG00000007932	ROGDI	0.0454406
ENSSSCG00000012297	CCDC22	0.0454751
ENSSSCG00000021825	RPS21	0.0455036
ENSSSCG00000012273	USP11	0.0455084
ENSSSCG00000012378	PDZD11	0.045536
ENSSSCG00000040401	EEF1A2	0.0455846
ENSSSCG00000033626	SREBF1	0.0456168
ENSSSCG00000000994	GMDS	0.0456905
ENSSSCG00000037973	KCNAB3	0.0457946
ENSSSCG00000038128	CDYL2	0.0458086
ENSSSCG00000026612	TIMM50	0.0458167
ENSSSCG00000011572	SEC13	0.0458806
ENSSSCG00000001986	NFATC4	0.0459149
ENSSSCG00000039656		0.045953
ENSSSCG00000014818	STARD10	0.0459793
ENSSSCG00000021361	ZNF710	0.0460548
ENSSSCG00000029838	FZD2	0.0460622
ENSSSCG00000024770	LIG3	0.0460786
ENSSSCG00000013867	SIN3B	0.04616
ENSSSCG00000013622	TMEM205	0.0461753
ENSSSCG00000010359	LDB3	0.0462567
ENSSSCG00000028612	PTPRS	0.0463221
ENSSSCG00000026931	SERTAD1	0.0464697
ENSSSCG00000017519	MRPL10	0.0464942
ENSSSCG00000011371	NDUFAF3	0.0465074
ENSSSCG00000016992	NEURL1B	0.046535
ENSSSCG00000020783	SLC41A1	0.0465775
ENSSSCG00000008601	SDC1	0.0465778
ENSSSCG00000038220	RXRA	0.0466287
ENSSSCG00000012269	CDK16	0.0466745
ENSSSCG00000010329	ZMIZ1	0.0467142
ENSSSCG00000000690	MLF2	0.0467204
ENSSSCG00000032721	TRAF3IP3	0.0467257
ENSSSCG00000038474	AURKAIP1	0.0467341
ENSSSCG00000028559	LZTS1	0.0467431
ENSSSCG00000028827	PARVA	0.0467619
ENSSSCG00000000661	PHC1	0.0468285
ENSSSCG00000016725	TNS3	0.0468568
ENSSSCG00000021427	DCTN4	0.0468711
ENSSSCG00000013722	WDR83	0.0468896
ENSSSCG00000003396	CLSTN1	0.0469472
ENSSSCG00000038800	PUF60	0.0469917
ENSSSCG00000000268	AAAS	0.0470766
ENSSSCG00000035364	VKORC1	0.0470796
ENSSSCG00000003090		0.0471272
ENSSSCG00000039619	PIN1	0.0471845
ENSSSCG00000011296	ANO10	0.0471908
ENSSSCG00000038287	RDH13	0.0472129
ENSSSCG00000013922		0.0472134
ENSSSCG00000013048	SPINDOC	0.047232
ENSSSCG00000032262	IDUA	0.0472974
ENSSSCG00000007358	EMILIN3	0.0473174
ENSSSCG00000001900	CSK	0.0473554
ENSSSCG00000000972	TUBGCP6	0.0474339
ENSSSCG00000000110	PLA2G6	0.0474343
ENSSSCG00000006501	SSR2	0.0474405
ENSSSCG00000035645		0.0474552
ENSSSCG00000003055	XRCC1	0.0474563
ENSSSCG00000012910	RPS6KB2	0.0474999
ENSSSCG00000008695	MFSD10	0.0475179
ENSSSCG00000009511	STK24	0.0475229
ENSSSCG00000002374	DLST	0.0475769
ENSSSCG00000012895		0.0475896
ENSSSCG00000012840	CD151	0.0476251
ENSSSCG00000016577	ATP6V1F	0.0476476
ENSSSCG00000014878	PAK1	0.0476569
ENSSSCG00000010706	SAMD4B	0.0476821
ENSSSCG00000005943	ST3GAL1	0.0477093
ENSSSCG00000025675	EEF2	0.047735
ENSSSCG00000012783	IDH3G	0.0478787
ENSSSCG00000031727		0.0478974
ENSSSCG00000001838	POLG	0.0479352
ENSSSCG00000023920	P3H1	0.0479542
ENSSSCG00000000232	ACVRL1	0.0480196
ENSSSCG00000009988	THOC5	0.0480811
ENSSSCG00000003152	RUVBL2	0.0482802
ENSSSCG00000007304		0.0483817
ENSSSCG00000036455		0.0483987
ENSSSCG00000029119	PRPF6	0.0484717
ENSSSCG00000003382	TAS1R1	0.0485859
ENSSSCG00000022034	SMYD3	0.0486069
ENSSSCG00000039460	RPL28	0.0486616
ENSSSCG00000032154	ERF	0.048699
ENSSSCG00000013896	MPV17L2	0.0487027
ENSSSCG00000015538	KIAA1614	0.0487067
ENSSSCG00000007982		0.0487187
ENSSSCG00000037418		0.0488338
ENSSSCG00000005912	GPAA1	0.0488612
ENSSSCG00000002952	YIF1B	0.0488742
ENSSSCG00000001916	INSYN1	0.0488767
ENSSSCG00000007116	CD93	0.0489543
ENSSSCG00000010078		0.0491166
ENSSSCG00000010259	TYSND1	0.0491208
ENSSSCG00000036224		0.049176
ENSSSCG00000037131	CLTA	0.0492727
ENSSSCG00000017693	AATF	0.0492995
ENSSSCG00000017778	DHRS13	0.0493064
ENSSSCG00000006612	S100A10	0.0493887
ENSSSCG00000000024	PARVB	0.0494384
ENSSSCG00000021408	TKT	0.0495056
ENSSSCG00000001520	LEMD2	0.0495504
ENSSSCG00000003160	NTF4	0.0495669
ENSSSCG00000027812	IQSEC1	0.0496962
ENSSSCG00000006689	PIAS3	0.0497473
ENSSSCG00000036832	STK40	0.0497528
ENSSSCG00000013889		0.0497624
ENSSSCG00000038231	ABCD4	0.0497809
ENSSSCG00000029745	FAM193A	0.0498507
ENSSSCG00000003128	LIG1	0.0498807
ENSSSCG00000031513	HRAS	0.0498856
ENSSSCG00000011129	ITIH5	0.0499593
ENSSSCG00000013589	SNAPC2	0.0499943
ENSSSCG00000004674	SHF	0.0500449
ENSSSCG00000037354	MMACHC	0.0500736
ENSSSCG00000023498	HSPB6	0.050079
ENSSSCG00000007188		0.0501325
ENSSSCG00000025766	SLC10A3	0.0501789
ENSSSCG00000032251		0.0502274
ENSSSCG00000036102	TCF25	0.050283
ENSSSCG00000001511	PHF1	0.0503078
ENSSSCG00000017238	TTYH2	0.0503151
ENSSSCG00000035875	OS9	0.0504296
ENSSSCG00000001579		0.0504923
ENSSSCG00000003064	ETHE1	0.0505712
ENSSSCG00000035854	RAB11FIP3	0.0506105
ENSSSCG00000034502	H6PD	0.0507413
ENSSSCG00000037121	KIAA0319L	0.0507937
ENSSSCG00000017938	YBX2	0.050804
ENSSSCG00000001885	C15orf39	0.0509627
ENSSSCG00000024750	GFOD2	0.050998
ENSSSCG00000013779	PKN1	0.0510261
ENSSSCG00000038776	GET3	0.0510559
ENSSSCG00000012885		0.051106
ENSSSCG00000036938	CTDSP1	0.0512337
ENSSSCG00000024756	SPG7	0.0513382
ENSSSCG00000005716	POMT1	0.0513584
ENSSSCG00000036603		0.0513956
ENSSSCG00000030369	YARS	0.0514069
ENSSSCG00000012088		0.0515274
ENSSSCG00000010052	BCR	0.0515516
ENSSSCG00000010258	AIFM2	0.0515748
ENSSSCG00000016772	VPS41	0.0516039
ENSSSCG00000032265	TLE5	0.0516049
ENSSSCG00000036970	SUGP1	0.0516095
ENSSSCG00000014347	PROB1	0.0516293
ENSSSCG00000022655	PTGES2	0.0517538
ENSSSCG00000033107	DYNLT1	0.0517648
ENSSSCG00000033260	TNNI2	0.0517665
ENSSSCG00000003165	RPS11	0.0517939
ENSSSCG00000034876	PET100	0.0517961
ENSSSCG00000013930	ATP13A1	0.0518396
ENSSSCG00000006667	BOLA1	0.0519234
ENSSSCG00000000144	TXN2	0.0519646
ENSSSCG00000022310	VPS9D1	0.0520284
ENSSSCG00000037224		0.0520435
ENSSSCG00000032003		0.0521092
ENSSSCG00000007805	ATP2A1	0.0521833
ENSSSCG00000004761	ZFYVE19	0.0521926
ENSSSCG00000016216	TUBA4A	0.0522146
ENSSSCG00000017591	NME2	0.0523012
ENSSSCG00000033358	VPS37D	0.0523163
ENSSSCG00000007757	TRIM72	0.0524112
ENSSSCG00000012918	GRK2	0.0524916
ENSSSCG00000039021	LSM2	0.0525416
ENSSSCG00000003434	MFN2	0.0526509
ENSSSCG00000017401	ATP6V0A1	0.0527265
ENSSSCG00000031594		0.0528133
ENSSSCG00000017282	SCN4A	0.052874
ENSSSCG00000005944	NDRG1	0.0530896
ENSSSCG00000031981	SHISA4	0.0530964
ENSSSCG00000003486	ARHGEF10L	0.0532548
ENSSSCG00000005914	SHARPIN	0.0533102
ENSSSCG00000027307	NDUFA11	0.0533272
ENSSSCG00000010973	RPP25L	0.05333
ENSSSCG00000033136		0.0533874
ENSSSCG00000023391	LONP2	0.0534029
ENSSSCG00000001764	SH2D7	0.0534602
ENSSSCG00000035729	MYOZ3	0.0534838
ENSSSCG00000033171	MAPK11	0.0535374
ENSSSCG00000003343	ATAD3A	0.053589
ENSSSCG00000040535		0.053593
ENSSSCG00000000204	PRPF40B	0.0536514
ENSSSCG00000000361	CD63	0.053666
ENSSSCG00000005659	ZER1	0.0536807
ENSSSCG00000002645	GALNS	0.0537891
ENSSSCG00000011356	UQCRC1	0.0537981
ENSSSCG00000017091	TNIP1	0.0538416
ENSSSCG00000015535	QSOX1	0.0538606
ENSSSCG00000005678	NTMT1	0.0539128
ENSSSCG00000035344	UBE2S	0.0539681
ENSSSCG00000012560		0.0539927
ENSSSCG00000012984	SCYL1	0.054097
ENSSSCG00000013259	DGKZ	0.0541725
ENSSSCG00000025323	SF3B3	0.054205
ENSSSCG00000025647	SLC35C1	0.0543713
ENSSSCG00000012967	FOSL1	0.054584
ENSSSCG00000027288	DAGLB	0.0546052
ENSSSCG00000023760	CLEC14A	0.0547307
ENSSSCG00000014851	SLCO2B1	0.0547507
ENSSSCG00000004757	VPS18	0.0547591
ENSSSCG00000037061	RRP1	0.0548315
ENSSSCG00000036967	ARL8A	0.0549331
ENSSSCG00000040265	UBFD1	0.0550735
ENSSSCG00000027127	MAP2K2	0.0550787
ENSSSCG00000025260	CARD10	0.0552126
ENSSSCG00000031370		0.0553312
ENSSSCG00000002963		0.0553612
ENSSSCG00000007560	TMEM184A	0.0553871
ENSSSCG00000038086	ECHS1	0.055445
ENSSSCG00000036595		0.0555915
ENSSSCG00000008016	MRPS34	0.0557877
ENSSSCG00000017203	GALK1	0.055836
ENSSSCG00000035849	PTPRF	0.0558506
ENSSSCG00000012287	TFE3	0.0559885
ENSSSCG00000027491		0.0560268
ENSSSCG00000017521	SCRN2	0.056108
ENSSSCG00000009885	HECTD4	0.0561607
ENSSSCG00000006774	PPM1J	0.0563968
ENSSSCG00000000691	COPS7A	0.0564899
ENSSSCG00000014133	RPS23	0.0565378
ENSSSCG00000003217	ASPDH	0.0565528
ENSSSCG00000004961	ITGA11	0.0566123
ENSSSCG00000016372	STK25	0.0568002
ENSSSCG00000002013	DHRS4	0.0568513
ENSSSCG00000004856	NFATC1	0.056881
ENSSSCG00000006187	MSC	0.0569885
ENSSSCG00000006307	RCSD1	0.0569932
ENSSSCG00000012955	RAB1B	0.0570254
ENSSSCG00000017835	CLUH	0.0570636
ENSSSCG00000017136	TBCD	0.0571551
ENSSSCG00000008030	TSR3	0.0571578
ENSSSCG00000003570	WDTC1	0.0571921
ENSSSCG00000017949	WRAP53	0.0574426
ENSSSCG00000001504	WDR46	0.0574573
ENSSSCG00000007688		0.057472
ENSSSCG00000039873	DCXR	0.057512
ENSSSCG00000027128	LONP1	0.0575496
ENSSSCG00000007278	AHCY	0.0575936
ENSSSCG00000029430	IPO13	0.0576112
ENSSSCG00000035829	KMT5C	0.0576178
ENSSSCG00000016380		0.0576938
ENSSSCG00000003341	TAS1R3	0.0577992
ENSSSCG00000001463	PSMB9	0.0578313
ENSSSCG00000012904	AIP	0.057832
ENSSSCG00000030546	HSD11B1L	0.0578326
ENSSSCG00000009554	GRTP1	0.0578558
ENSSSCG00000034810	PEF1	0.0578584
ENSSSCG00000013423	WDR18	0.0580193
ENSSSCG00000037445		0.0580236
ENSSSCG00000008008	STUB1	0.0580778
ENSSSCG00000021891		0.0581679
ENSSSCG00000010111		0.0585008
ENSSSCG00000013239	PSMC3	0.0585494
ENSSSCG00000000010	FBLN1	0.0586891
ENSSSCG00000033982	ZNHIT1	0.0586934
ENSSSCG00000001701	HSP90AB1	0.0586995
ENSSSCG00000022777	SLC35C2	0.0587257
ENSSSCG00000035028	GRK6	0.0587261
ENSSSCG00000010774	ZNF511	0.0588504
ENSSSCG00000001762	CIB2	0.0589461
ENSSSCG00000003465	FBLIM1	0.0589511
ENSSSCG00000028920	POLDIP2	0.0594502
ENSSSCG00000003167		0.0594788
ENSSSCG00000002508	SETD3	0.0595628
ENSSSCG00000007806	RABEP2	0.0596285
ENSSSCG00000000411	NAB2	0.0597172
ENSSSCG00000037865	SOX18	0.0597686
ENSSSCG00000037459	TCTA	0.0598039
ENSSSCG00000035969	THRA	0.0598996
ENSSSCG00000032763	PYCR3	0.0600892
ENSSSCG00000006610	S100A11	0.0601381
ENSSSCG00000007383	TOMM34	0.0601534
ENSSSCG00000020737	ZNRD2	0.06021
ENSSSCG00000010306	SEC24C	0.060274
ENSSSCG00000011813	P3H2	0.0602762
ENSSSCG00000007800	SEPTIN1	0.0602942
ENSSSCG00000011609	FBLN2	0.0603114
ENSSSCG00000027525	DHCR24	0.0604356
ENSSSCG00000032144	ZNF140	0.0604666
ENSSSCG00000039930	ZNF446	0.0606065
ENSSSCG00000034378	IFNGR2	0.0608887
ENSSSCG00000032369	HSD3B7	0.0608914
ENSSSCG00000013600	RAB11B	0.0608914
ENSSSCG00000003289	ISOC2	0.0611777
ENSSSCG00000034632	PDXP	0.0613272
ENSSSCG00000032769		0.0613325
ENSSSCG00000000215	SMARCD1	0.0613385
ENSSSCG00000030849		0.061359
ENSSSCG00000003383	ZBTB48	0.0614633
ENSSSCG00000017510	CACNB1	0.0614999
ENSSSCG00000033836	SHKBP1	0.0616394
ENSSSCG00000031786	NCDN	0.0616575
ENSSSCG00000007032	PLAT	0.0617479
ENSSSCG00000008303	CCT7	0.0617686
ENSSSCG00000021934	OTUD5	0.0618566
ENSSSCG00000013656	MRPL4	0.061927
ENSSSCG00000007927	PPL	0.0620063
ENSSSCG00000010109	SCARF2	0.0621302
ENSSSCG00000031216	HS3ST6	0.0622631
ENSSSCG00000034440	MMP28	0.0622787
ENSSSCG00000017143	CEP131	0.0622906
ENSSSCG00000011619	EEFSEC	0.062296
ENSSSCG00000029602	WDR37	0.0623216
ENSSSCG00000004544	SPG21	0.0624115
ENSSSCG00000001702	SLC35B2	0.0624463
ENSSSCG00000012896	NDUFV1	0.062498
ENSSSCG00000005701	ASS1	0.0625617
ENSSSCG00000040273		0.062641
ENSSSCG00000002431	TDP1	0.0627044
ENSSSCG00000002712	LDHD	0.0627069
ENSSSCG00000012291	GPKOW	0.0628015
ENSSSCG00000037734	UBE2M	0.062853
ENSSSCG00000039843	IPO9	0.0629601
ENSSSCG00000001501	VPS52	0.0629989
ENSSSCG00000023680	MEPCE	0.0630439
ENSSSCG00000000062	CSDC2	0.0630462
ENSSSCG00000008007	WDR24	0.0630465
ENSSSCG00000039196	POLR2I	0.0630583
ENSSSCG00000016376		0.063059
ENSSSCG00000029458	SLC16A2	0.0630725
ENSSSCG00000013761	CC2D1A	0.0631507
ENSSSCG00000007738		0.0632183
ENSSSCG00000012279		0.0632201
ENSSSCG00000016781	TRIO	0.0632851
ENSSSCG00000007308	ROMO1	0.0632907
ENSSSCG00000011353	PFKFB4	0.0633325
ENSSSCG00000006089	PTDSS1	0.0633406
ENSSSCG00000030294	ZNF398	0.0633558
ENSSSCG00000003350	MIB2	0.0633933
ENSSSCG00000000258	RARG	0.0633974
ENSSSCG00000040850	GPR17	0.0633983
ENSSSCG00000013913	KLHL26	0.0635026
ENSSSCG00000005976	NDUFB9	0.0635273
ENSSSCG00000012953	YIF1A	0.0635415
ENSSSCG00000023935	GMPPA	0.0635487
ENSSSCG00000000064	ACO2	0.0636614
ENSSSCG00000025203	KNOP1	0.0636841
ENSSSCG00000008689	ZFYVE28	0.0638183
ENSSSCG00000029724	RACK1	0.0638644
ENSSSCG00000027907		0.0638939
ENSSSCG00000002026	EFS	0.0639459
ENSSSCG00000003435	MIIP	0.0639488
ENSSSCG00000040188	TNFSF12	0.0639871
ENSSSCG00000010681	SFXN4	0.0640686
ENSSSCG00000006083	LAPTM4B	0.0642067
ENSSSCG00000017906		0.0642103
ENSSSCG00000036235		0.0642871
ENSSSCG00000031349		0.0646737
ENSSSCG00000006502	ARHGEF2	0.0648631
ENSSSCG00000016435	SMARCD3	0.0648655
ENSSSCG00000013105		0.0649041
ENSSSCG00000002905	RBM42	0.0649559
ENSSSCG00000016532	WDR91	0.0649943
ENSSSCG00000032728	EFNB1	0.0650845
ENSSSCG00000012926	PC	0.0653745
ENSSSCG00000027197	DYRK1B	0.065395
ENSSSCG00000036796	VWA7	0.0654135
ENSSSCG00000034898	MYDGF	0.0654372
ENSSSCG00000035532	ATP5F1D	0.0654981
ENSSSCG00000035839	TOP3A	0.0655642
ENSSSCG00000032522		0.0655715
ENSSSCG00000003030	CIC	0.0656196
ENSSSCG00000037081		0.0656317
ENSSSCG00000001433	PPT2	0.0658774
ENSSSCG00000039311	NCS1	0.0659657
ENSSSCG00000032156		0.0660722
ENSSSCG00000007791	CD2BP2	0.0661511
ENSSSCG00000017907	PFN1	0.0661534
ENSSSCG00000007231	MYLK2	0.0661942
ENSSSCG00000040509	LIMD2	0.0661944
ENSSSCG00000002681	HSDL1	0.0662384
ENSSSCG00000039198	PCGF2	0.0662597
ENSSSCG00000007161	LZTS3	0.0664513
ENSSSCG00000014016	SQSTM1	0.0665976
ENSSSCG00000033759	TBXA2R	0.0666674
ENSSSCG00000028943	ECH1	0.0667729
ENSSSCG00000007998	RHBDL1	0.0667755
ENSSSCG00000037557	DRC3	0.0668471
ENSSSCG00000038940	GNPDA1	0.0669741
ENSSSCG00000039390	EIF3B	0.0670547
ENSSSCG00000032836	TRIM41	0.0670706
ENSSSCG00000013661	EIF3G	0.0671289
ENSSSCG00000013023	RASGRP2	0.0671366
ENSSSCG00000009761	NCOR2	0.067195
ENSSSCG00000010447	ACTA2	0.0672087
ENSSSCG00000010107	MED15	0.0673071
ENSSSCG00000039054	CRTAP	0.0673102
ENSSSCG00000007433	PCIF1	0.0674196
ENSSSCG00000000274	PCBP2	0.0675063
ENSSSCG00000000735	TSPAN9	0.0675451
ENSSSCG00000017119	CLPTM1L	0.0675471
ENSSSCG00000034227	RPL35	0.0676221
ENSSSCG00000005627	AK1	0.0676338
ENSSSCG00000007799	MYLPF	0.0676907
ENSSSCG00000028149	THYN1	0.0677087
ENSSSCG00000005649	URM1	0.0677626
ENSSSCG00000030017	FOXRED1	0.0678994
ENSSSCG00000003194	AKT1S1	0.0679423
ENSSSCG00000012773	PNCK	0.0680744
ENSSSCG00000039372	EMC10	0.0681631
ENSSSCG00000029154	NOSIP	0.068185
ENSSSCG00000037605	BRI3	0.068231
ENSSSCG00000039740		0.0682572
ENSSSCG00000017196	MRPL38	0.0682646
ENSSSCG00000034529	SMIM4	0.0683103
ENSSSCG00000002729		0.0683772
ENSSSCG00000013303	ABTB2	0.0684244
ENSSSCG00000011293	POMGNT2	0.068425
ENSSSCG00000039929	ERCC2	0.0684382
ENSSSCG00000035479	DISP1	0.0684473
ENSSSCG00000006696	GJA5	0.0684481
ENSSSCG00000039557	TRIM54	0.0684724
ENSSSCG00000039085		0.0685076
ENSSSCG00000003134	GRWD1	0.0685171
ENSSSCG00000005661	ENDOG	0.0686754
ENSSSCG00000014822		0.0686757
ENSSSCG00000015048	DRD2	0.0687008
ENSSSCG00000034101	D2HGDH	0.0687111
ENSSSCG00000034692	SH3BP4	0.0687208
ENSSSCG00000039647	EIF3F	0.0688081
ENSSSCG00000007941	CDIP1	0.0689464
ENSSSCG00000022584	PPP1R3F	0.068958
ENSSSCG00000003428	MTHFR	0.0690613
ENSSSCG00000038285	KLHL36	0.0691011
ENSSSCG00000033286		0.0691239
ENSSSCG00000036272		0.0691884
ENSSSCG00000008004	ANTKMT	0.0692544
ENSSSCG00000008550	SLC5A6	0.0693095
ENSSSCG00000017868		0.0693222
ENSSSCG00000000083		0.0693955
ENSSSCG00000001884	COMMD4	0.0694016
ENSSSCG00000031781	PSMB10	0.0694352
ENSSSCG00000003153	FTL	0.0694523
ENSSSCG00000000018	KIAA0930	0.0694862
ENSSSCG00000012290		0.0695524
ENSSSCG00000037232	SNX29	0.0695621
ENSSSCG00000034302	SLC12A7	0.0697089
ENSSSCG00000021587	MESD	0.0697336
ENSSSCG00000013524	MICOS13	0.0697463
ENSSSCG00000028063		0.0697989
ENSSSCG00000009755	AACS	0.0698041
ENSSSCG00000033148	MRPL12	0.0698708
ENSSSCG00000010010	PES1	0.0700787
ENSSSCG00000003404	DFFA	0.0702119
[truncated: 2,581 more rows]

## Sheet: T0T1_WGCNA_Yellow_module
Table S13: Gene co-expression Yellow module and meat quality and gluteus medius (GM) fatty acids composition traits significantly associated according to WGCNA algorithm in the AL-T0/AL-T1 contrast.
Intramuscular pH (PHGM)
ID	Gene	P-value
ENSSSCG00000029811	PLCL2	0.000282725
ENSSSCG00000031876	TMEM159	0.000488184
ENSSSCG00000028097	GPBP1L1	0.000629397
ENSSSCG00000024260	RPL11	0.000795896
ENSSSCG00000014013		0.00105147
ENSSSCG00000007088		0.00138246
ENSSSCG00000016970		0.00142275
ENSSSCG00000015872	GPD2	0.00156896
ENSSSCG00000014305	SAR1B	0.00157979
ENSSSCG00000014881	CLNS1A	0.00199823
ENSSSCG00000000891	LTA4H	0.0020241
ENSSSCG00000029578	NFATC3	0.00234108
ENSSSCG00000010261	PPA1	0.00260611
ENSSSCG00000026900	C15orf41	0.00286042
ENSSSCG00000031182	PRELID1	0.00321009
ENSSSCG00000030438		0.00321674
ENSSSCG00000004048	TCP1	0.0032201
ENSSSCG00000039060	RASSF3	0.00323401
ENSSSCG00000017732	ZNF207	0.00350188
ENSSSCG00000021628	TMEM70	0.00397809
ENSSSCG00000032216	ATMIN	0.00403512
ENSSSCG00000003520		0.0040424
ENSSSCG00000040929	TPT1	0.00427191
ENSSSCG00000029741		0.00435641
ENSSSCG00000005169	RPS6	0.00485457
ENSSSCG00000010876	DESI2	0.00495213
ENSSSCG00000004177	RPS12	0.00501956
ENSSSCG00000030284	TRNAU1AP	0.00522124
ENSSSCG00000002034	ACIN1	0.00542404
ENSSSCG00000040383	MFAP1	0.00550309
ENSSSCG00000039763	CMBL	0.00552193
ENSSSCG00000010928	KDM5B	0.00559593
ENSSSCG00000010563	BTRC	0.00585677
ENSSSCG00000001709	SUPT3H	0.00637359
ENSSSCG00000038708		0.00638482
ENSSSCG00000001556	MAPK14	0.0064276
ENSSSCG00000007733		0.00707192
ENSSSCG00000025940		0.00713472
ENSSSCG00000012689	ZNF75D	0.00722359
ENSSSCG00000015951	METAP1D	0.00745099
ENSSSCG00000025806	FAM118B	0.00767051
ENSSSCG00000017254	MAP2K6	0.00767838
ENSSSCG00000005982		0.0077186
ENSSSCG00000028423		0.00776449
ENSSSCG00000009029	ARHGAP10	0.00785243
ENSSSCG00000020963	EPDR1	0.00786095
ENSSSCG00000011103	PARD3	0.00790689
ENSSSCG00000008486	GALM	0.00795548
ENSSSCG00000008222		0.00797346
ENSSSCG00000006141	CA3	0.00805118
ENSSSCG00000009509	IPO5	0.00813162
ENSSSCG00000036711	UBE2D2	0.00820009
ENSSSCG00000015632		0.00821447
ENSSSCG00000006168	PEX2	0.00826083
ENSSSCG00000032111	RPL7	0.0083101
ENSSSCG00000026990	FAM162A	0.00853562
ENSSSCG00000032918		0.00870118
ENSSSCG00000030222	ANAPC7	0.00881697
ENSSSCG00000016157	MYL1	0.00883584
ENSSSCG00000028485	YBX1	0.00921758
ENSSSCG00000005782	TM2D3	0.00957998
ENSSSCG00000012114	MSL3	0.0096604
ENSSSCG00000003580	EYA3	0.00970752
ENSSSCG00000012405	RPS4X	0.00993272
ENSSSCG00000002045		0.00995345
ENSSSCG00000015534	ACBD6	0.0100839
ENSSSCG00000013855	FAM32A	0.0101032
ENSSSCG00000039046	RPL36A-HNRNPH2	0.0102014
ENSSSCG00000030957	NFKB1	0.0102421
ENSSSCG00000009140	CASP6	0.0102579
ENSSSCG00000009906	SRSF9	0.0104127
ENSSSCG00000000754	RAD52	0.0105361
ENSSSCG00000010295	ECD	0.0108903
ENSSSCG00000011629	ACAD11	0.0109345
ENSSSCG00000017058	MED7	0.0111315
ENSSSCG00000008143	UXS1	0.0114761
ENSSSCG00000009956	GRK3	0.0115558
ENSSSCG00000033424		0.0117061
ENSSSCG00000001578	CMTR1	0.0119975
ENSSSCG00000011535	ARL8B	0.0120883
ENSSSCG00000011131	PRKCQ	0.0131068
ENSSSCG00000009849	SUDS3	0.0135704
ENSSSCG00000003531	KDM1A	0.0135797
ENSSSCG00000009360	ALG5	0.01365
ENSSSCG00000013299	APIP	0.0138554
ENSSSCG00000009842	CCDC60	0.0140145
ENSSSCG00000010179	ARV1	0.0141212
ENSSSCG00000038907	DNAJC8	0.0141695
ENSSSCG00000009185	ADH5	0.0145494
ENSSSCG00000029003		0.0147532
ENSSSCG00000035199	PTGES3L	0.0149826
ENSSSCG00000008170	RPL31	0.0153985
ENSSSCG00000020868	TMEM192	0.0155558
ENSSSCG00000028855	GMPS	0.0156193
ENSSSCG00000008113	MRPS5	0.0156344
ENSSSCG00000009775	CDK2AP1	0.0156362
ENSSSCG00000009889	ALDH2	0.0157092
ENSSSCG00000000801	TMEM117	0.0157224
ENSSSCG00000034647	MRPS15	0.0157775
ENSSSCG00000012174	APOO	0.0160352
ENSSSCG00000017067	CNOT8	0.01616
ENSSSCG00000032541	TIGD2	0.0163541
ENSSSCG00000020858	KIF13A	0.0167099
ENSSSCG00000004945	RPL4	0.0167702
ENSSSCG00000007022	ANK1	0.0174626
ENSSSCG00000018082	COX3	0.0174744
ENSSSCG00000016572	TNPO3	0.0175682
ENSSSCG00000021007	MRPL19	0.0177733
ENSSSCG00000007026	VDAC3	0.0177802
ENSSSCG00000038254	PRKRA	0.0181392
ENSSSCG00000030632	UBE2V1	0.0181447
ENSSSCG00000024481	PDE4DIP	0.0185227
ENSSSCG00000033842	CFDP1	0.0186492
ENSSSCG00000038465	VAPA	0.0187106
ENSSSCG00000025906	ALKBH1	0.0187969
ENSSSCG00000023599	TIMM8B	0.0188948
ENSSSCG00000004556		0.0192577
ENSSSCG00000040854		0.0192934
ENSSSCG00000016078	HSPE1	0.0196435
ENSSSCG00000011036	STAM	0.0198863
ENSSSCG00000039555	JOSD1	0.0200437
ENSSSCG00000004508	DYM	0.0200892
ENSSSCG00000009019	RPS3A	0.0202186
ENSSSCG00000023010		0.0203413
ENSSSCG00000004510	ACAA2	0.0204821
ENSSSCG00000009925	GIT2	0.0204874
ENSSSCG00000004487	MTO1	0.0204982
ENSSSCG00000035393	SAAL1	0.0212215
ENSSSCG00000039978		0.0212988
ENSSSCG00000009519	CLYBL	0.0213746
ENSSSCG00000002352	ZNF410	0.0217505
ENSSSCG00000036296	RPS25	0.022089
ENSSSCG00000025492	NUDT13	0.0221102
ENSSSCG00000011373	QRICH1	0.0221585
ENSSSCG00000002629	FBXO9	0.0223531
ENSSSCG00000000383	RNF41	0.0224898
ENSSSCG00000012042	ATP5PO	0.022609
ENSSSCG00000027530	TAF12	0.0230435
ENSSSCG00000029219	SH3BGR	0.0234287
ENSSSCG00000006899	RPL5	0.0234738
ENSSSCG00000028542		0.0235013
ENSSSCG00000000161	PWP1	0.0238087
ENSSSCG00000017316	NSF	0.0239705
ENSSSCG00000000611		0.0240896
ENSSSCG00000014406	PRELID2	0.024184
ENSSSCG00000013366	LDHA	0.0241869
ENSSSCG00000012172	ACOT9	0.024389
ENSSSCG00000009238	COQ2	0.0244426
ENSSSCG00000017796	BLMH	0.0245709
ENSSSCG00000032720	SMPX	0.0246149
ENSSSCG00000016434	RHEB	0.0246696
ENSSSCG00000012569	ATG4A	0.025122
ENSSSCG00000008659		0.0254034
ENSSSCG00000008377	CCT4	0.0257002
ENSSSCG00000034725	UBE2R2	0.025749
ENSSSCG00000036168	PDSS2	0.0258701
ENSSSCG00000001871	HMG20A	0.0262954
ENSSSCG00000021355	SOD1	0.0263818
ENSSSCG00000004146	REPS1	0.0263854
ENSSSCG00000035768	RPS15A	0.0271411
ENSSSCG00000034501	RIOX2	0.0272016
ENSSSCG00000011562	EMC3	0.0272057
ENSSSCG00000001716	RCAN2	0.0272174
ENSSSCG00000012440	PGK1	0.0274289
ENSSSCG00000026498		0.0274372
ENSSSCG00000023434	PPM1L	0.027441
ENSSSCG00000007524		0.0276053
ENSSSCG00000036924	PSMA4	0.0276086
ENSSSCG00000011787	MAGEF1	0.0277102
ENSSSCG00000013470	MRPS33	0.027759
ENSSSCG00000038826	NDUFV2	0.0277981
ENSSSCG00000010325	KCNMA1	0.0279261
ENSSSCG00000015424	PSMC2	0.0284425
ENSSSCG00000012698	SLC9A6	0.0284644
ENSSSCG00000007853	LYRM1	0.0287472
ENSSSCG00000015384	TOMM7	0.0291212
ENSSSCG00000006507	DAP3	0.029914
ENSSSCG00000026472	RPL7L1	0.030288
ENSSSCG00000034771	CCNDBP1	0.0304667
ENSSSCG00000035820	TXNDC17	0.0304888
ENSSSCG00000002822	AMFR	0.0308279
ENSSSCG00000031593	NUDT3	0.0314662
ENSSSCG00000038493	PFDN1	0.0316382
ENSSSCG00000037228	RRAGB	0.0316481
ENSSSCG00000010290	MCU	0.0335255
ENSSSCG00000009611	XPO7	0.0342197
ENSSSCG00000037416	CLIC5	0.0342224
ENSSSCG00000038672		0.0344444
ENSSSCG00000011134	RBM17	0.0346106
ENSSSCG00000011082	COMMD3	0.0347473
ENSSSCG00000016985	BNIP1	0.034972
ENSSSCG00000008376	COMMD1	0.0350029
ENSSSCG00000011272		0.0350338
ENSSSCG00000032914	MANF	0.0350719
ENSSSCG00000010175	GNPAT	0.0362089
ENSSSCG00000031617	SFT2D2	0.0363531
ENSSSCG00000035007	RPL17-C18orf32	0.0367295
ENSSSCG00000028850	RPL26	0.0369787
ENSSSCG00000011893	COX17	0.0370487
ENSSSCG00000011494	PSMD6	0.0370809
ENSSSCG00000030211	NBR1	0.0375346
ENSSSCG00000040828		0.038065
ENSSSCG00000031140		0.038631
ENSSSCG00000011147	AKR1C2	0.0388585
ENSSSCG00000002804	CSNK2A2	0.0389034
ENSSSCG00000028033	SECISBP2	0.0400166
ENSSSCG00000002655	MAP1LC3B	0.0401301
ENSSSCG00000010058		0.0402055
ENSSSCG00000029651	SLN	0.040622
ENSSSCG00000017065	MRPL22	0.041404
ENSSSCG00000000697		0.0421974
ENSSSCG00000016695	HIBADH	0.0425792
ENSSSCG00000032747		0.042611
ENSSSCG00000017608		0.0429521
ENSSSCG00000021654	ZNF641	0.0431407
ENSSSCG00000009532	POGLUT2	0.0434198
ENSSSCG00000015486	PIGC	0.0437609
ENSSSCG00000028178	FH	0.0439138
ENSSSCG00000008753	ADGRA3	0.0439883
ENSSSCG00000012382		0.044311
ENSSSCG00000009821	ARPC3	0.0445727
ENSSSCG00000006081		0.0448109
ENSSSCG00000002707		0.0453076
ENSSSCG00000014071	BTF3	0.045562
ENSSSCG00000014394	RNF14	0.0455731
ENSSSCG00000028343	MRPL9	0.0456387
ENSSSCG00000027358	RPS17	0.0456902
ENSSSCG00000008877	ETFDH	0.047168
ENSSSCG00000009305	GTF3A	0.0475599
ENSSSCG00000009674	ELP3	0.0480046
ENSSSCG00000016177	XRCC5	0.048735
ENSSSCG00000038475		0.0491602
ENSSSCG00000038196		0.0496207
ENSSSCG00000004775		0.0496639
ENSSSCG00000040528	TTC1	0.0497253
ENSSSCG00000005006	RPL36AL	0.0501058
ENSSSCG00000022760		0.0501688
ENSSSCG00000011190	METTL6	0.0502769
ENSSSCG00000001769	MORF4L1	0.0503602
ENSSSCG00000004936	INTS14	0.0508872
ENSSSCG00000002799	CNOT1	0.0515463
ENSSSCG00000005996	MRPL13	0.0518306
ENSSSCG00000010251	SUPV3L1	0.0519785
ENSSSCG00000003673	CEP192	0.0528087
ENSSSCG00000010345	GHITM	0.0532688
ENSSSCG00000004037	MAP3K4	0.0539862
ENSSSCG00000021410	STRAP	0.054009
ENSSSCG00000011367	ARIH2	0.0540772
ENSSSCG00000011968	NIT2	0.0546307
ENSSSCG00000002743	IST1	0.055108
ENSSSCG00000039582		0.0553012
ENSSSCG00000024019		0.0554231
ENSSSCG00000011215	OXSM	0.0555701
ENSSSCG00000034190		0.055595
ENSSSCG00000013592	ELAVL1	0.0557846
ENSSSCG00000037065	EMP2	0.056019
ENSSSCG00000014376	HARS2	0.0560756
ENSSSCG00000011003	NDUFB6	0.0560977
ENSSSCG00000028553	ILF2	0.0562126
ENSSSCG00000014250		0.0562194
ENSSSCG00000040777		0.0562237
ENSSSCG00000004550	OAZ2	0.0566817
ENSSSCG00000009241	COPS4	0.057141
ENSSSCG00000029989	MED28	0.057357
ENSSSCG00000003903		0.0574645
ENSSSCG00000040327		0.0577342
ENSSSCG00000023118	BZW2	0.0585193
ENSSSCG00000015473	TMEM183A	0.0586468
ENSSSCG00000000905		0.0587029
ENSSSCG00000026257	STMN1	0.0589574
ENSSSCG00000023903	ATP5ME	0.0592978
ENSSSCG00000008207	RPIA	0.0593118
ENSSSCG00000009349	RFC3	0.0602736
ENSSSCG00000006830	PSMA5	0.0605163
ENSSSCG00000015754	MCPH1	0.0606594
ENSSSCG00000023495	PITHD1	0.0612349
ENSSSCG00000003984		0.0612937
ENSSSCG00000023277	NDUFA1	0.0613936
ENSSSCG00000002433	PSMC1	0.0617678
ENSSSCG00000030426	C9orf78	0.0620264
ENSSSCG00000010682	PRDX3	0.0627737
ENSSSCG00000000767	ATP6V1E1	0.0635332
ENSSSCG00000038507		0.0636514
ENSSSCG00000003691	MYL12A	0.0639799
ENSSSCG00000036584	HAUS8	0.064914
ENSSSCG00000035570	HNRNPL	0.0649287
ENSSSCG00000021023	SCAF4	0.0651455
ENSSSCG00000017593	UTP18	0.0653087
ENSSSCG00000010962	FRMD3	0.0655962
ENSSSCG00000025966	EIF4H	0.0657905
ENSSSCG00000039715	FAHD1	0.0660856
ENSSSCG00000011274	CTNNB1	0.0661195
ENSSSCG00000007307		0.0665207
ENSSSCG00000007322		0.0670101
ENSSSCG00000035771	MRPS22	0.0697854
ENSSSCG00000034655	COQ7	0.0699007
ENSSSCG00000007342	RPRD1B	0.0699137
ENSSSCG00000005009	KLHDC2	0.0699467
ENSSSCG00000006725		0.0705106
ENSSSCG00000037251		0.07053
ENSSSCG00000033326	RPL37	0.0712249
ENSSSCG00000012046		0.071456
ENSSSCG00000015422	PMPCB	0.0719493
ENSSSCG00000031809	ZKSCAN5	0.0725939
ENSSSCG00000007618	ZNF789	0.0730251
ENSSSCG00000036294	NUDT19	0.0732602
ENSSSCG00000003643	SF3A3	0.0739494
ENSSSCG00000015558	SMG7	0.0751457
ENSSSCG00000038191	ABT1	0.0757086
ENSSSCG00000002035	C14orf119	0.0758589
ENSSSCG00000040087	SPRTN	0.0762242
ENSSSCG00000001564	SRSF3	0.0764444
ENSSSCG00000029652	TMBIM6	0.0765914
ENSSSCG00000001800	TM6SF1	0.0771067
ENSSSCG00000005347	POLR1E	0.0779246
ENSSSCG00000022788	PPA2	0.0788663
ENSSSCG00000016232	MRPL44	0.0791089
ENSSSCG00000023130	ASCC1	0.0791363
ENSSSCG00000022839	IFFO2	0.0804432
ENSSSCG00000026229		0.0807217
ENSSSCG00000034444	EIF4EBP2	0.0810785
ENSSSCG00000027085	UQCRFS1	0.0812915
ENSSSCG00000003738	MAPRE2	0.0821655
ENSSSCG00000015034	SDHD	0.0825585
ENSSSCG00000010560	MRPL43	0.0829052
ENSSSCG00000000860	NUP37	0.0836676
ENSSSCG00000024313		0.0843341
ENSSSCG00000007743		0.0846675
ENSSSCG00000028805	PTPRM	0.085847
ENSSSCG00000006544	UBE2Q1	0.0858924
ENSSSCG00000031088		0.0875949
ENSSSCG00000005095		0.0878353
ENSSSCG00000038466	EIF4E2	0.087927
ENSSSCG00000028406	FOCAD	0.089051
ENSSSCG00000033176	SAP30L	0.0907128
ENSSSCG00000006153	FABP5	0.0911663
ENSSSCG00000038900		0.0913713
ENSSSCG00000028973	PHACTR4	0.0920863
ENSSSCG00000002381	NEK9	0.0925001
ENSSSCG00000033402	SARAF	0.092523
ENSSSCG00000031530	DERL2	0.0931372
ENSSSCG00000023245	NONO	0.0931794
ENSSSCG00000015949	SLC25A12	0.0932874
ENSSSCG00000008225	PTCD3	0.0936163
ENSSSCG00000024443	ORC6	0.0943986
ENSSSCG00000031892	HSBP1	0.0951901
ENSSSCG00000009556	CUL4A	0.0956065
ENSSSCG00000001573	PIM1	0.0963725
ENSSSCG00000005478		0.0966233
ENSSSCG00000040571		0.0967503
ENSSSCG00000002406	AHSA1	0.0978366
ENSSSCG00000025751	MDH1	0.0979354
ENSSSCG00000007845	UQCRC2	0.0982561
ENSSSCG00000028679	PLEKHB2	0.0987404
ENSSSCG00000039425	BPGM	0.0988409
ENSSSCG00000008546	GPN1	0.0989141
ENSSSCG00000023862	MTMR8	0.0997211
ENSSSCG00000015565	C1orf21	0.100563
ENSSSCG00000030567	SSR3	0.101559
ENSSSCG00000009744	SFSWAP	0.102236
ENSSSCG00000008332	C2orf42	0.102905
ENSSSCG00000004094	PPP1R14C	0.103018
ENSSSCG00000027711	SS18L2	0.105148
ENSSSCG00000034278	SLC31A1	0.106296
ENSSSCG00000029169	MAPKAP1	0.106887
ENSSSCG00000033971	ZNF407	0.106934
ENSSSCG00000005532	MRRF	0.106957
ENSSSCG00000009186	METAP1	0.10762
ENSSSCG00000014791	RRM1	0.107847
ENSSSCG00000010299	ANXA7	0.108409
ENSSSCG00000001207	PGBD1	0.110203
ENSSSCG00000024384	DCAF12	0.110681
ENSSSCG00000005217	RCL1	0.111016
ENSSSCG00000022446	SEL1L3	0.111254
ENSSSCG00000021634	PPP1R8	0.111401
ENSSSCG00000028414		0.113058
ENSSSCG00000039045	SLC26A2	0.113499
ENSSSCG00000028288	PRPF38A	0.114853
ENSSSCG00000012816	MTCP1	0.115337
ENSSSCG00000013861	SLC35E1	0.115738
ENSSSCG00000002697	NUDT7	0.120601
ENSSSCG00000034086	ATP5F1C	0.121295
ENSSSCG00000014880	AQP11	0.121783
ENSSSCG00000008602	LAPTM4A	0.122092
ENSSSCG00000009146	RPL34	0.122582
ENSSSCG00000029313	ITGB1BP1	0.122796
ENSSSCG00000021588	DAPK2	0.123205
ENSSSCG00000020962	DYNLL2	0.123844
ENSSSCG00000022955	POLR2B	0.124199
ENSSSCG00000027166	BICD2	0.125865
ENSSSCG00000005596	ARPC5L	0.126123
ENSSSCG00000022714	OSER1	0.12634
ENSSSCG00000016758	STK17A	0.126476
ENSSSCG00000028974	UST	0.126879
ENSSSCG00000004148	CCDC28A	0.130311
ENSSSCG00000030108	ZNFX1	0.130315
ENSSSCG00000038304		0.130553
ENSSSCG00000015790	SLC25A4	0.130598
ENSSSCG00000010550	CWF19L1	0.131047
ENSSSCG00000017069	LARP1	0.131584
ENSSSCG00000010030	EIF4ENIF1	0.131605
ENSSSCG00000005933	CHRAC1	0.131718
ENSSSCG00000026446		0.132385
ENSSSCG00000008947	COX18	0.136383
ENSSSCG00000038399	ATP5PF	0.137228
ENSSSCG00000039591	SERINC3	0.138034
ENSSSCG00000016543	EXOC4	0.138496
ENSSSCG00000004374	QRSL1	0.138758
ENSSSCG00000006016	EIF3H	0.139172
ENSSSCG00000039058		0.139666
ENSSSCG00000031913	NDUFB4	0.140313
ENSSSCG00000031893		0.141803
ENSSSCG00000031639	ZCCHC17	0.142281
ENSSSCG00000017957	EIF4A1	0.14293
ENSSSCG00000037372		0.146508
ENSSSCG00000021210	HIKESHI	0.148443
ENSSSCG00000038650	TLCD1	0.149549
ENSSSCG00000006646	ARNT	0.150145
ENSSSCG00000030428	TWNK	0.152592
ENSSSCG00000023738	COG3	0.153191
ENSSSCG00000036966		0.153283
ENSSSCG00000004826	SELENOS	0.153418
ENSSSCG00000031707	CTDSP2	0.153443
ENSSSCG00000035034	CNIH4	0.153993
ENSSSCG00000011351	TMA7	0.154023
ENSSSCG00000026622	EAF1	0.154807
ENSSSCG00000010035	YWHAH	0.155079
ENSSSCG00000031869	VPS72	0.155559
ENSSSCG00000001533	TAF11	0.156548
ENSSSCG00000030204	IPPK	0.156729
ENSSSCG00000011565	BRK1	0.157706
ENSSSCG00000011901	TMEM39A	0.157804
ENSSSCG00000036676	MAIP1	0.157907
ENSSSCG00000030125	SELENOF	0.159032
ENSSSCG00000033167	SLC7A6OS	0.16156
ENSSSCG00000015288	RBBP5	0.161984
ENSSSCG00000010187	TAF5L	0.164949
ENSSSCG00000032129	COX7B	0.165058
ENSSSCG00000009854	RFC5	0.165793
ENSSSCG00000040984	PPIL1	0.166462
ENSSSCG00000017731	PSMD11	0.167476
ENSSSCG00000013232		0.168477
ENSSSCG00000022390	RGN	0.169109
ENSSSCG00000028600	SLC39A9	0.169346
ENSSSCG00000030268	ZFAND5	0.170029
ENSSSCG00000010999	SMU1	0.170118
ENSSSCG00000010542	CUTC	0.170601
ENSSSCG00000015432	ATXN7L1	0.170944
ENSSSCG00000002340	PSEN1	0.17114
ENSSSCG00000040786	SPTBN1	0.171627
ENSSSCG00000014327	BRD8	0.171943
ENSSSCG00000012334	TSR2	0.172335
ENSSSCG00000008548	SUPT7L	0.173703
ENSSSCG00000029168	MARF1	0.174272
ENSSSCG00000004224	HDDC2	0.175164
ENSSSCG00000033278	ATP6V1D	0.175295
ENSSSCG00000039587		0.175296
ENSSSCG00000029311	MYPN	0.175527
ENSSSCG00000012061		0.175585
ENSSSCG00000009934	KCTD10	0.175591
ENSSSCG00000007109	XRN2	0.176289
ENSSSCG00000023273	SH3YL1	0.17686
ENSSSCG00000022107	CHTOP	0.177698
ENSSSCG00000028633	AMMECR1L	0.178212
ENSSSCG00000015796	PDLIM3	0.178619
ENSSSCG00000015583	SMYD2	0.178621
ENSSSCG00000001975	PRKD1	0.179557
ENSSSCG00000009569	PSPC1	0.180648
ENSSSCG00000008569	HADHB	0.181005
ENSSSCG00000038989	CRK	0.181665
ENSSSCG00000038307	POLE4	0.181746
ENSSSCG00000023373	ZNHIT3	0.183335
ENSSSCG00000034617		0.184317
ENSSSCG00000012525	BEX1	0.187636
ENSSSCG00000027506	POLD3	0.187916
ENSSSCG00000004373	RTN4IP1	0.190041
ENSSSCG00000034774	TBX6	0.191719
ENSSSCG00000015065	BUD13	0.191815
ENSSSCG00000017382	EZH1	0.192748
ENSSSCG00000015602	INTS7	0.192854
ENSSSCG00000006386	COPA	0.193046
ENSSSCG00000030487		0.193683
ENSSSCG00000011317	FYCO1	0.194133
ENSSSCG00000017869	ITGAE	0.194615
ENSSSCG00000038237	UQCC1	0.195656
ENSSSCG00000010829		0.195938
ENSSSCG00000006809	RBM15	0.197625
ENSSSCG00000040937	ACCSL	0.198954
ENSSSCG00000038366	RAP2B	0.205651
ENSSSCG00000040663	HERPUD1	0.205869
ENSSSCG00000032910	C12orf73	0.206172
ENSSSCG00000003555	HMGN2	0.208106
ENSSSCG00000013223	NUP160	0.208968
ENSSSCG00000024791		0.21209
ENSSSCG00000007352	DHX35	0.213566
ENSSSCG00000029649	IFT46	0.214048
ENSSSCG00000021024	ASB8	0.214553
ENSSSCG00000035581	SUGCT	0.214762
ENSSSCG00000039577		0.217056
ENSSSCG00000034843		0.218178
ENSSSCG00000002460		0.218314
ENSSSCG00000006371	USF1	0.219386
ENSSSCG00000012532	TCEAL1	0.220054
ENSSSCG00000012366	LAS1L	0.221051
ENSSSCG00000015611	UTP25	0.221936
ENSSSCG00000028167	SLIRP	0.222005
ENSSSCG00000016109	ALS2	0.223553
ENSSSCG00000031881	CDC42SE1	0.226771
ENSSSCG00000005725		0.229794
ENSSSCG00000012489	TRMT2B	0.230932
ENSSSCG00000010576	NOLC1	0.23095
ENSSSCG00000015563	RGL1	0.231403
ENSSSCG00000028287	C2orf68	0.231983
ENSSSCG00000010158	TOMM20	0.232055
ENSSSCG00000004480	COX7A2	0.234319
ENSSSCG00000007475	MOCS3	0.236572
ENSSSCG00000001880	SIN3A	0.237034
ENSSSCG00000029212	GDE1	0.237408
ENSSSCG00000010692	WDR11	0.241822
ENSSSCG00000029005	KPNA2	0.243454
ENSSSCG00000007609		0.24387
ENSSSCG00000011639	SRPRB	0.245188
ENSSSCG00000035790	BTG1	0.247291
ENSSSCG00000040060	APEX1	0.247388
ENSSSCG00000028694	ATP6V1B2	0.248567
ENSSSCG00000031791	ARF4	0.250535
ENSSSCG00000038957		0.250787
ENSSSCG00000038534	TSR1	0.252454
ENSSSCG00000005777	TXNL4A	0.25556
ENSSSCG00000024361	TFB1M	0.259499
ENSSSCG00000006304	MPC2	0.259896
ENSSSCG00000011395	RBM5	0.260215
ENSSSCG00000004454	ME1	0.262181
ENSSSCG00000025921	TMEM41A	0.262527
ENSSSCG00000024938	SH3BP5	0.263095
ENSSSCG00000040943	DCTN5	0.264473
ENSSSCG00000034752	SUPT4H1	0.265359
ENSSSCG00000010135	DGCR8	0.269279
ENSSSCG00000039494	NDUFC2	0.269951
ENSSSCG00000036129	RNF114	0.270428
ENSSSCG00000011447	SPCS1	0.271259
ENSSSCG00000021652	LSM8	0.272289
ENSSSCG00000007179	STK35	0.27836
ENSSSCG00000007963	ZNF263	0.278696
ENSSSCG00000003596	SNRNP40	0.280256
ENSSSCG00000001038		0.287595
ENSSSCG00000033690	DERL1	0.288188
ENSSSCG00000010308	CHCHD1	0.288227
ENSSSCG00000034835		0.288931
ENSSSCG00000022282	BDH2	0.291029
ENSSSCG00000037381	GET1	0.297268
ENSSSCG00000038533	NAPG	0.297482
ENSSSCG00000016912	PLPP1	0.311546
ENSSSCG00000011567		0.311897
ENSSSCG00000025820	SLC15A4	0.313225
ENSSSCG00000016492	AGK	0.315206
ENSSSCG00000017525	NFE2L1	0.315408
ENSSSCG00000005645	TRUB2	0.315709
ENSSSCG00000037185		0.319044
ENSSSCG00000006510		0.320062
ENSSSCG00000007617		0.320322
ENSSSCG00000001757	WDR61	0.325803
ENSSSCG00000031847	RBM28	0.326338
ENSSSCG00000004367	POPDC3	0.32829
ENSSSCG00000002367	ISCA2	0.330942
ENSSSCG00000039080	TRIB2	0.332059
ENSSSCG00000007955	CLUAP1	0.333041
ENSSSCG00000016291	GIGYF2	0.33558
ENSSSCG00000024411		0.336316
ENSSSCG00000008130	CIAO1	0.336411
ENSSSCG00000011864	UMPS	0.338072
ENSSSCG00000013437	TCF3	0.339337
ENSSSCG00000025010	UNC50	0.347183
ENSSSCG00000034345	SPRY3	0.347934
ENSSSCG00000030253	NOL9	0.349019
ENSSSCG00000030373	METTL9	0.34926
ENSSSCG00000006319	POGK	0.354362
ENSSSCG00000023865		0.355858
ENSSSCG00000020715	GOLGA7	0.363719
ENSSSCG00000016548		0.363914
ENSSSCG00000024776	SNRPG	0.367376
ENSSSCG00000017919	MED11	0.383584
ENSSSCG00000036483		0.417735
ENSSSCG00000007931	GLYR1	0.426478
ENSSSCG00000016566	NRF1	0.427203
ENSSSCG00000000693	NCAPD2	0.428203
ENSSSCG00000032239		0.432781
ENSSSCG00000018008	SCO1	0.445351
ENSSSCG00000021200		0.451971
ENSSSCG00000010605	STN1	0.456359
ENSSSCG00000011433	WDR82	0.45812
ENSSSCG00000007076	NDUFAF5	0.484069
ENSSSCG00000009974	EWSR1	0.484595
ENSSSCG00000040922	IP6K2	0.493917
ENSSSCG00000029576	ZNF239	0.499614
ENSSSCG00000003980	EXO5	0.519255
ENSSSCG00000034129	MRPL33	0.528355
ENSSSCG00000015545	GLUL	0.537549
ENSSSCG00000022664	ZSCAN16	0.541455
ENSSSCG00000015721	ERCC3	0.541491
ENSSSCG00000003621	ZSCAN20	0.54436
ENSSSCG00000027119	SELRC1	0.55053
ENSSSCG00000015035	C11orf52	0.551405
ENSSSCG00000002459		0.564271
ENSSSCG00000017099	FASTKD3	0.574502
ENSSSCG00000004114	RAB32	0.587172
ENSSSCG00000007808	NFATC2IP	0.588116
ENSSSCG00000008690	RNF4	0.589665
ENSSSCG00000039867	UCK2	0.604201
ENSSSCG00000021761	UBAP1	0.622613
ENSSSCG00000031442	CLP1	0.63853
ENSSSCG00000011604	CHCHD4	0.643387
ENSSSCG00000036756	ZNF496	0.651473
ENSSSCG00000005355	EXOSC3	0.653248
ENSSSCG00000036564	ZNF740	0.654351
ENSSSCG00000035863	PLIN2	0.654394
ENSSSCG00000006691	POLR3C	0.677355
ENSSSCG00000022787	RABIF	0.682329
ENSSSCG00000027865	GALC	0.683851
ENSSSCG00000005370		0.713907
ENSSSCG00000014033	RMND5B	0.793295
ENSSSCG00000001206	ZSCAN26	0.805615
ENSSSCG00000002344	RIOX1	0.896612
ENSSSCG00000040425	YRDC	0.920438
ENSSSCG00000009844	HSPB8	0.921344
ENSSSCG00000005890	ZNF7	0.927891
ENSSSCG00000003103	FKRP	0.934197
ENSSSCG00000000842	KANSL2	0.939041
ENSSSCG00000037843	TMEM138	0.95065
ENSSSCG00000040007	PIGV	0.98011
ENSSSCG00000002748	DHX38	0.982995
ENSSSCG00000011270	EIF1B	0.984068
ENSSSCG00000012623	SLC25A5	0.989785
ENSSSCG00000022212	SNRNP35	0.995502
